# Supplementary material for: Differential scanning calorimetry of whole Escherichia coli treated with the antimicrobial peptide MSI-78 indicate a multi-hit mechanism with ribosomes as a novel target
Source: PeerJ. 2015 Dec 17;3:e1516. doi: 10.7717/peerj.1516 (PMC4690349; doi:10.7717/peerj.1516)
Supplement: Supplemental Information 1 [file peerj-03-1516-s002.xlsx]

## Sheet: Control JM109 scans
Experiment 1			Experiment 2			Experiment 3			Experiment 4			Experiment 5			Experiment 6			Experiment 7			Experiment 8
Temperature	Power		Temperature	Power		Temperature	Power (µW)		Temp	Power		Temp	Power		Temp	Power		Temp	Power		Temp	Power
5.00122	-35.791		5.00121	-35.764		5.00116	-35.937		5.001	-36.515		5.001	-36.515		5.00062	-36.182		5.00131	-36.18		5.00088	-37.51
5.02437	-35.223		5.01867	-34.992		5.0185	-35.168		5.01833	-35.727		5.01833	-35.727		5.01791	-35.405		5.01874	-35.414		5.0189	-36.754
5.0571	-32.309		5.04996	-33.428		5.05674	-32.431		5.05649	-32.944		5.05649	-32.944		5.04904	-33.74		5.05691	-32.439		5.05048	-34.811
5.1026	-26.906		5.08669	-28.746		5.09426	-27.686		5.09394	-28.199		5.09394	-28.199		5.08567	-28.986		5.09434	-27.359		5.08731	-29.711
5.14375	-23.804		5.12679	-24.958		5.13491	-24.393		5.13454	-25.058		5.13454	-25.058		5.12573	-25.231		5.1349	-23.619		5.13572	-24.803
5.18683	-22.854		5.16916	-23.371		5.18467	-23.297		5.17727	-24.154		5.17727	-24.154		5.1681	-23.761		5.18633	-22.203		5.18712	-23.494
5.23122	-22.787		5.21309	-22.814		5.22908	-23.521		5.22147	-24.406		5.22147	-24.406		5.22101	-23.615		5.23071	-21.937		5.23143	-23.424
5.27642	-25.115		5.26709	-25.128		5.27433	-26.165		5.27568	-28.327		5.27568	-28.327		5.26615	-26.265		5.27593	-24.084		5.27654	-25.742
5.32204	-28.473		5.31266	-28.497		5.32002	-29.901		5.32136	-32.594		5.32136	-32.594		5.31181	-30.11		5.32159	-27.278		5.32207	-29.089
5.36782	-32.304		5.35844	-32.395		5.36587	-34.125		5.3672	-37.333		5.3672	-37.333		5.35768	-34.514		5.36741	-30.94		5.36777	-32.88
5.41354	-36.224		5.4042	-36.447		5.41167	-38.423		5.41299	-42.123		5.41299	-42.123		5.40353	-39.041		5.41319	-34.696		5.41342	-36.743
5.45908	-39.966		5.4498	-40.365		5.45728	-42.497		5.45859	-46.653		5.45859	-46.653		5.44922	-43.386		5.45878	-38.301		5.45888	-40.401
5.50433	-43.354		5.49513	-43.981		5.50261	-46.118		5.5039	-50.741		5.5039	-50.741		5.49463	-47.35		5.5041	-41.591		5.50408	-43.705
5.54926	-46.317		5.54014	-47.176		5.54761	-49.228		5.54888	-54.254		5.54888	-54.254		5.53971	-50.772		5.55803	-45.09		5.55789	-47.238
5.59383	-48.857		5.5848	-49.924		5.59223	-51.858		5.59349	-57.166		5.59349	-57.166		5.58443	-53.674		5.60256	-47.417		5.60234	-49.518
5.63803	-50.964		5.62908	-52.217		5.63649	-54.056		5.63773	-59.546		5.63773	-59.546		5.62876	-56.098		5.64674	-49.334		5.64644	-51.401
5.68188	-52.639		5.67301	-54.046		5.68038	-55.84		5.6816	-61.493		5.6816	-61.493		5.67273	-58.079		5.69055	-50.852		5.6902	-52.903
5.7254	-53.915		5.7166	-55.439		5.72394	-57.227		5.72514	-63.06		5.72514	-63.06		5.71635	-59.634		5.73403	-51.983		5.73365	-54.034
5.76861	-54.849		5.75987	-56.464		5.76718	-58.236		5.76836	-64.252		5.76836	-64.252		5.75966	-60.774		5.77721	-52.795		5.7768	-54.837
5.81156	-55.491		5.80287	-57.179		5.81015	-58.929		5.81131	-65.092		5.81131	-65.092		5.80267	-61.565		5.82012	-53.333		5.81968	-55.37
5.85426	-55.895		5.84562	-57.64		5.85286	-59.368		5.854	-65.643		5.854	-65.643		5.84542	-62.082		5.86278	-53.65		5.86234	-55.688
5.89676	-56.113		5.88815	-57.899		5.89536	-59.606		5.89649	-65.966		5.89649	-65.966		5.89644	-62.411		5.90524	-53.811		5.9048	-55.847
5.93908	-56.209		5.93049	-58.017		5.93769	-59.713		5.93879	-66.12		5.93879	-66.12		5.93875	-62.526		5.94752	-53.878		5.94708	-55.913
5.98124	-56.253		5.97268	-58.068		5.97986	-59.76		5.98095	-66.18		5.98095	-66.18		5.98091	-62.575		5.98966	-53.918		5.98922	-55.953
6.02329	-56.273		6.01474	-58.098		6.0219	-59.784		6.02298	-66.215		6.02298	-66.215		6.02293	-62.601		6.03168	-53.884		6.03125	-55.919
6.06523	-56.121		6.05669	-58.001		6.06384	-59.636		6.0649	-66.167		6.0649	-66.167		6.06486	-62.454		6.0736	-53.592		6.07318	-55.634
6.11546	-55.624		6.09856	-57.636		6.1057	-59.227		6.10674	-65.844		6.10674	-65.844		6.11507	-61.926		6.11543	-53.105		6.11503	-55.154
6.15724	-55.069		6.14037	-57.111		6.1475	-58.672		6.14853	-65.33		6.14853	-65.33		6.15684	-61.34		6.15721	-52.516		6.15683	-54.57
6.19899	-54.45		6.18212	-56.504		6.18925	-58.039		6.19026	-64.714		6.19026	-64.714		6.19857	-60.678		6.19894	-51.877		6.19858	-53.933
6.2407	-53.802		6.22384	-55.852		6.23096	-57.369		6.23196	-64.042		6.23196	-64.042		6.24027	-59.992		6.24064	-51.212		6.24029	-53.277
6.28238	-53.149		6.26553	-55.186		6.27265	-56.694		6.27364	-63.349		6.27364	-63.349		6.28195	-59.299		6.28232	-50.548		6.28198	-52.618
6.32406	-52.505		6.3072	-54.525		6.31432	-56.018		6.3153	-62.661		6.3153	-62.661		6.3236	-58.612		6.32398	-49.894		6.32366	-51.976
6.36572	-51.879		6.34886	-53.877		6.35597	-55.362		6.35694	-61.987		6.35694	-61.987		6.36524	-57.946		6.36563	-49.266		6.36532	-51.35
6.40737	-51.275		6.39051	-53.257		6.39761	-54.734		6.39858	-61.333		6.39858	-61.333		6.40687	-57.308		6.40726	-48.66		6.40697	-50.75
6.44901	-50.695		6.43214	-52.659		6.43926	-54.131		6.4402	-60.707		6.4402	-60.707		6.4485	-56.697		6.44889	-48.085		6.44862	-50.174
6.49066	-50.147		6.47377	-52.093		6.48089	-53.559		6.48183	-60.109		6.48183	-60.109		6.49012	-56.116		6.49051	-47.539		6.49027	-49.629
6.5323	-49.619		6.5154	-51.556		6.52252	-53.016		6.52345	-59.539		6.52345	-59.539		6.53173	-55.565		6.53214	-47.017		6.53192	-49.11
6.57395	-49.123		6.55703	-51.041		6.56415	-52.497		6.56507	-58.996		6.56507	-58.996		6.57335	-55.041		6.57377	-46.525		6.57357	-48.617
6.6156	-48.647		6.59867	-50.555		6.60579	-52.007		6.6067	-58.487		6.6067	-58.487		6.61498	-54.549		6.61541	-46.055		6.61523	-48.15
6.65726	-48.196		6.64032	-50.089		6.64744	-51.544		6.64834	-57.998		6.64834	-57.998		6.65662	-54.074		6.65704	-45.605		6.65689	-47.705
6.69893	-47.772		6.68197	-49.646		6.6891	-51.097		6.68999	-57.531		6.68999	-57.531		6.69827	-53.623		6.69869	-45.186		6.69857	-47.279
6.7406	-47.362		6.72364	-49.227		6.73077	-50.672		6.73165	-57.09		6.73165	-57.09		6.73993	-53.199		6.74035	-44.789		6.74858	-46.801
6.78228	-46.976		6.76531	-48.827		6.77245	-50.269		6.77332	-56.664		6.77332	-56.664		6.7816	-52.79		6.78202	-44.403		6.79026	-46.421
6.82397	-46.61		6.80699	-48.445		6.81414	-49.884		6.81501	-56.261		6.81501	-56.261		6.82329	-52.401		6.8237	-44.037		6.83195	-46.064
6.86566	-46.258		6.84868	-48.081		6.85583	-49.521		6.8567	-55.879		6.8567	-55.879		6.86498	-52.032		6.86539	-43.691		6.87364	-45.718
6.90735	-45.92		6.89037	-47.738		6.89753	-49.176		6.89839	-55.511		6.89839	-55.511		6.90668	-51.679		6.90709	-43.359		6.91533	-45.39
6.94905	-45.599		6.93207	-47.41		6.93924	-48.842		6.94009	-55.161		6.94009	-55.161		6.94837	-51.338		6.94879	-43.037		6.95703	-45.078
6.99075	-45.293		6.97377	-47.092		6.98094	-48.525		6.98179	-54.831		6.98179	-54.831		6.99008	-51.02		6.99049	-42.731		6.99872	-44.779
7.03245	-44.999		7.01547	-46.788		7.02265	-48.223		7.02349	-54.516		7.02349	-54.516		7.03179	-50.718		7.03219	-42.446		7.04042	-44.491
7.07415	-44.717		7.05717	-46.501		7.06436	-47.934		7.06519	-54.209		7.06519	-54.209		7.07349	-50.421		7.0739	-42.171		7.08213	-44.215
7.11586	-44.441		7.09888	-46.228		7.10606	-47.657		7.10689	-53.919		7.10689	-53.919		7.1152	-50.137		7.1156	-41.908		7.12383	-43.946
7.15755	-44.18		7.14892	-45.905		7.15611	-47.333		7.1486	-53.639		7.1486	-53.639		7.15691	-49.869		7.15731	-41.651		7.16552	-43.687
7.19926	-43.928		7.19062	-45.646		7.19782	-47.074		7.19031	-53.367		7.19031	-53.367		7.19863	-49.611		7.19901	-41.403		7.20722	-43.439
7.24096	-43.688		7.23232	-45.4		7.23953	-46.828		7.23201	-53.103		7.23201	-53.103		7.24033	-49.36		7.24072	-41.163		7.24892	-43.197
7.28266	-43.455		7.27403	-45.163		7.28124	-46.59		7.27371	-52.848		7.27371	-52.848		7.28204	-49.113		7.28242	-40.934		7.29062	-42.963
7.32436	-43.223		7.31573	-44.937		7.32294	-46.358		7.31541	-52.603		7.31541	-52.603		7.32375	-48.874		7.32412	-40.713		7.33231	-42.738
7.36605	-43.002		7.35743	-44.718		7.36464	-46.13		7.35711	-52.369		7.35711	-52.369		7.36545	-48.649		7.36582	-40.499		7.37401	-42.522
7.40775	-42.792		7.39912	-44.498		7.40634	-45.913		7.39881	-52.143		7.39881	-52.143		7.40716	-48.431		7.40752	-40.287		7.4157	-42.315
7.44945	-42.591		7.44082	-44.292		7.44804	-45.704		7.44051	-51.918		7.44051	-51.918		7.44886	-48.221		7.44922	-40.085		7.4574	-42.114
7.49115	-42.392		7.48251	-44.089		7.48974	-45.503		7.48221	-51.7		7.48221	-51.7		7.49056	-48.014		7.49092	-39.885		7.4991	-41.913
7.53284	-42.197		7.52421	-43.897		7.53144	-45.306		7.52391	-51.491		7.52391	-51.491		7.53226	-47.811		7.53262	-39.696		7.54079	-41.719
7.57453	-42.006		7.5659	-43.709		7.57314	-45.117		7.5656	-51.291		7.5656	-51.291		7.57396	-47.615		7.57431	-39.515		7.58248	-41.532
7.61623	-41.823		7.60759	-43.528		7.61484	-44.931		7.60729	-51.095		7.60729	-51.095		7.61566	-47.428		7.61601	-39.335		7.62418	-41.354
7.65792	-41.646		7.64928	-43.347		7.65653	-44.748		7.64898	-50.905		7.64898	-50.905		7.65735	-47.247		7.6577	-39.161		7.66587	-41.183
7.69961	-41.478		7.69097	-43.172		7.69822	-44.573		7.69067	-50.718		7.69067	-50.718		7.69905	-47.071		7.6994	-38.99		7.70756	-41.016
7.7413	-41.315		7.73266	-43.007		7.73992	-44.405		7.73236	-50.539		7.73236	-50.539		7.74074	-46.895		7.74109	-38.828		7.74924	-40.855
7.78299	-41.154		7.77435	-42.843		7.78161	-44.245		7.77405	-50.365		7.77405	-50.365		7.78243	-46.727		7.78278	-38.67		7.79093	-40.697
7.82468	-40.998		7.81604	-42.691		7.82331	-44.086		7.81573	-50.2		7.81573	-50.2		7.82412	-46.563		7.82447	-38.517		7.83261	-40.541
7.86637	-40.846		7.85773	-42.542		7.86499	-43.934		7.85742	-50.036		7.85742	-50.036		7.86581	-46.406		7.87449	-38.343		7.8743	-40.394
7.90806	-40.703		7.89941	-42.397		7.90668	-43.784		7.89911	-49.875		7.89911	-49.875		7.9075	-46.257		7.91618	-38.202		7.91599	-40.253
7.94974	-40.566		7.9411	-42.255		7.94837	-43.64		7.9408	-49.72		7.9408	-49.72		7.94918	-46.111		7.95787	-38.062		7.95767	-40.116
7.99143	-40.43		7.98279	-42.115		7.99006	-43.502		7.98248	-49.573		7.98248	-49.573		7.99087	-45.972		7.99955	-37.928		7.99936	-39.985
8.03311	-40.302		8.02447	-41.983		8.03175	-43.369		8.02417	-49.428		8.02417	-49.428		8.03256	-45.834		8.04124	-37.798		8.04104	-39.856
8.07479	-40.177		8.06616	-41.856		8.07343	-43.238		8.06585	-49.29		8.06585	-49.29		8.07425	-45.697		8.08292	-37.675		8.08272	-39.731
8.11647	-40.055		8.10784	-41.732		8.11511	-43.113		8.10754	-49.154		8.10754	-49.154		8.11594	-45.568		8.1246	-37.555		8.1244	-39.609
8.15816	-39.935		8.14952	-41.615		8.1568	-42.993		8.14922	-49.022		8.14922	-49.022		8.15763	-45.443		8.16629	-37.441		8.16609	-39.49
8.19984	-39.817		8.1912	-41.501		8.19849	-42.872		8.1909	-48.892		8.1909	-48.892		8.19931	-45.324		8.20797	-37.331		8.20777	-39.375
8.24152	-39.703		8.23289	-41.39		8.24017	-42.755		8.23258	-48.77		8.23258	-48.77		8.24099	-45.21		8.24965	-37.223		8.24945	-39.264
8.2832	-39.594		8.27457	-41.281		8.28185	-42.643		8.27426	-48.652		8.27426	-48.652		8.28268	-45.097		8.29133	-37.117		8.29113	-39.158
8.32488	-39.489		8.31625	-41.173		8.32353	-42.536		8.31594	-48.538		8.31594	-48.538		8.32436	-44.987		8.33301	-37.015		8.33281	-39.055
8.36656	-39.389		8.35792	-41.068		8.36522	-42.436		8.35762	-48.429		8.35762	-48.429		8.36604	-44.878		8.37469	-36.914		8.37449	-38.958
8.40824	-39.292		8.3996	-40.969		8.4069	-42.339		8.3993	-48.322		8.3993	-48.322		8.40772	-44.774		8.41637	-36.818		8.41616	-38.863
8.44991	-39.195		8.44128	-40.876		8.45691	-42.225		8.44098	-48.216		8.44098	-48.216		8.44941	-44.674		8.45805	-36.725		8.45784	-38.77
8.49159	-39.105		8.48295	-40.785		8.49859	-42.132		8.48266	-48.115		8.48266	-48.115		8.49109	-44.577		8.49973	-36.634		8.49952	-38.678
8.53327	-39.015		8.52463	-40.699		8.54027	-42.041		8.52434	-48.016		8.52434	-48.016		8.53277	-44.483		8.54141	-36.547		8.5412	-38.588
8.57494	-38.929		8.56631	-40.616		8.58195	-41.952		8.56601	-47.921		8.56601	-47.921		8.57444	-44.394		8.58309	-36.464		8.58288	-38.503
8.61662	-38.845		8.60799	-40.535		8.62363	-41.867		8.60769	-47.831		8.60769	-47.831		8.61612	-44.309		8.62477	-36.384		8.62455	-38.421
8.6583	-38.765		8.64967	-40.455		8.66531	-41.785		8.64937	-47.744		8.64937	-47.744		8.6578	-44.225		8.66645	-36.305		8.66623	-38.343
8.69998	-38.687		8.69135	-40.376		8.70699	-41.706		8.69105	-47.66		8.69105	-47.66		8.69948	-44.141		8.70812	-36.228		8.7079	-38.268
8.74166	-38.613		8.73303	-40.298		8.74867	-41.632		8.73272	-47.576		8.73272	-47.576		8.74116	-44.06		8.7498	-36.154		8.74958	-38.196
8.78333	-38.543		8.7747	-40.224		8.79035	-41.56		8.7744	-47.494		8.7744	-47.494		8.78284	-43.98		8.79814	-36.069		8.79126	-38.127
8.82501	-38.476		8.81638	-40.153		8.83203	-41.488		8.81608	-47.413		8.81608	-47.413		8.82451	-43.905		8.83982	-35.998		8.83293	-38.058
8.86669	-38.408		8.85806	-40.086		8.87371	-41.418		8.85776	-47.335		8.85776	-47.335		8.86619	-43.835		8.88149	-35.93		8.87461	-37.99
8.90836	-38.342		8.89973	-40.022		8.91538	-41.351		8.89944	-47.26		8.89944	-47.26		8.90787	-43.766		8.92317	-35.866		8.91628	-37.925
8.95003	-38.279		8.94141	-39.961		8.95706	-41.286		8.94111	-47.19		8.94111	-47.19		8.94955	-43.7		8.96485	-35.804		8.95796	-37.859
8.99171	-38.216		8.98308	-39.901		8.99873	-41.221		8.98279	-47.122		8.98279	-47.122		8.99122	-43.635		9.00652	-35.745		8.99963	-37.797
9.03338	-38.156		9.02475	-39.845		9.04041	-41.159		9.02446	-47.058		9.02446	-47.058		9.0329	-43.571		9.04819	-35.69		9.0413	-37.736
9.07506	-38.099		9.06643	-39.787		9.08208	-41.099		9.06614	-46.996		9.06614	-46.996		9.07457	-43.508		9.08987	-35.633		9.08298	-37.679
9.11673	-38.043		9.1081	-39.732		9.12375	-41.042		9.10781	-46.935		9.10781	-46.935		9.11624	-43.448		9.13154	-35.58		9.12465	-37.623
9.1584	-37.989		9.14978	-39.678		9.16543	-40.987		9.14949	-46.873		9.14949	-46.873		9.15792	-43.387		9.17322	-35.527		9.16632	-37.571
9.20008	-37.939		9.19146	-39.624		9.20711	-40.936		9.19116	-46.813		9.19116	-46.813		9.19959	-43.329		9.2149	-35.475		9.20799	-37.521
9.24175	-37.891		9.23313	-39.572		9.24878	-40.886		9.23283	-46.753		9.23283	-46.753		9.24127	-43.273		9.25657	-35.424		9.24967	-37.472
9.29176	-37.835		9.2748	-39.522		9.29046	-40.837		9.28284	-46.685		9.28284	-46.685		9.29127	-43.209		9.29824	-35.375		9.29968	-37.414
9.33343	-37.79		9.31647	-39.474		9.33213	-40.789		9.32451	-46.632		9.32451	-46.632		9.33295	-43.159		9.33991	-35.328		9.34135	-37.366
9.3751	-37.744		9.35814	-39.428		9.37381	-40.742		9.36618	-46.58		9.36618	-46.58		9.37462	-43.112		9.38158	-35.283		9.38302	-37.32
9.41677	-37.698		9.39981	-39.384		9.41548	-40.696		9.40786	-46.53		9.40786	-46.53		9.4163	-43.066		9.42325	-35.238		9.42469	-37.276
9.45845	-37.654		9.44148	-39.342		9.45715	-40.651		9.44953	-46.482		9.44953	-46.482		9.45797	-43.021		9.46492	-35.196		9.46636	-37.231
9.50012	-37.61		9.48315	-39.302		9.49882	-40.607		9.4912	-46.435		9.4912	-46.435		9.49964	-42.975		9.50659	-35.156		9.50804	-37.188
9.54179	-37.567		9.52483	-39.264		9.5405	-40.567		9.53287	-46.387		9.53287	-46.387		9.54131	-42.93		9.54826	-35.118		9.54971	-37.148
9.58347	-37.527		9.5665	-39.226		9.58217	-40.529		9.57454	-46.34		9.57454	-46.34		9.58299	-42.887		9.58993	-35.08		9.59138	-37.108
9.62514	-37.489		9.60817	-39.189		9.62384	-40.49		9.61621	-46.295		9.61621	-46.295		9.62466	-42.844		9.63161	-35.043		9.63305	-37.069
9.66681	-37.452		9.64984	-39.154		9.66552	-40.453		9.65788	-46.25		9.65788	-46.25		9.66633	-42.804		9.67328	-35.007		9.67473	-37.033
9.70848	-37.416		9.69151	-39.117		9.70719	-40.417		9.69955	-46.206		9.69955	-46.206		9.708	-42.765		9.71495	-34.971		9.7164	-36.996
9.75015	-37.383		9.73318	-39.082		9.74886	-40.384		9.74123	-46.165		9.74123	-46.165		9.74967	-42.728		9.75663	-34.935		9.75807	-36.963
9.79182	-37.351		9.77485	-39.049		9.79053	-40.35		9.7829	-46.125		9.7829	-46.125		9.79135	-42.693		9.7983	-34.901		9.79974	-36.929
9.83349	-37.319		9.82486	-39.01		9.8322	-40.317		9.82457	-46.087		9.82457	-46.087		9.83302	-42.661		9.83997	-34.868		9.84141	-36.896
9.87516	-37.287		9.87319	-38.975		9.87387	-40.285		9.86624	-46.051		9.86624	-46.051		9.87469	-42.629		9.88164	-34.837		9.88308	-36.865
9.91683	-37.257		9.91486	-38.947		9.91554	-40.254		9.90791	-46.017		9.90791	-46.017		9.91637	-42.597		9.92331	-34.807		9.92475	-36.833
9.95849	-37.226		9.95653	-38.919		9.95721	-40.222		9.94958	-45.983		9.94958	-45.983		9.95804	-42.565		9.96498	-34.778		9.96642	-36.802
10.0002	-37.197		9.99821	-38.893		9.99888	-40.192		9.99125	-45.95		9.99125	-45.95		9.99971	-42.534		10.0067	-34.75		10.0081	-36.773
10.0418	-37.168		10.0399	-38.868		10.0405	-40.161		10.0329	-45.917		10.0329	-45.917		10.0414	-42.503		10.0483	-34.724		10.0498	-36.744
10.0835	-37.14		10.0816	-38.843		10.0822	-40.133		10.0746	-45.885		10.0746	-45.885		10.0831	-42.472		10.09	-34.698		10.0914	-36.716
10.1252	-37.113		10.1232	-38.82		10.1239	-40.106		10.1163	-45.853		10.1163	-45.853		10.1247	-42.442		10.1317	-34.673		10.1331	-36.691
10.1669	-37.087		10.1649	-38.796		10.1656	-40.081		10.1579	-45.822		10.1579	-45.822		10.1664	-42.414		10.1733	-34.648		10.1748	-36.666
10.2085	-37.063		10.2066	-38.773		10.2072	-40.056		10.1996	-45.793		10.1996	-45.793		10.2081	-42.387		10.215	-34.625		10.2164	-36.641
10.2502	-37.039		10.2482	-38.75		10.2489	-40.033		10.2413	-45.765		10.2413	-45.765		10.2497	-42.359		10.2567	-34.601		10.2581	-36.617
10.2919	-37.018		10.2899	-38.728		10.2906	-40.011		10.2829	-45.738		10.2829	-45.738		10.2914	-42.334		10.2983	-34.578		10.2998	-36.594
10.3402	-36.994		10.3316	-38.706		10.3323	-39.991		10.3246	-45.711		10.3246	-45.711		10.3331	-42.31		10.34	-34.555		10.3414	-36.572
10.3819	-36.975		10.3732	-38.684		10.3739	-39.971		10.3663	-45.686		10.3663	-45.686		10.3747	-42.287		10.3817	-34.534		10.3831	-36.551
10.4235	-36.956		10.4149	-38.663		10.4156	-39.951		10.4079	-45.661		10.4079	-45.661		10.4164	-42.265		10.4233	-34.513		10.4248	-36.529
10.4652	-36.937		10.4566	-38.643		10.4573	-39.93		10.4496	-45.636		10.4496	-45.636		10.4581	-42.244		10.465	-34.494		10.4665	-36.508
10.5069	-36.918		10.4982	-38.624		10.4989	-39.911		10.4913	-45.612		10.4913	-45.612		10.4998	-42.223		10.5067	-34.475		10.5081	-36.487
10.5485	-36.9		10.5399	-38.606		10.5406	-39.89		10.533	-45.588		10.533	-45.588		10.5414	-42.201		10.5483	-34.456		10.5498	-36.467
10.5902	-36.882		10.5816	-38.59		10.5823	-39.871		10.5746	-45.565		10.5746	-45.565		10.5831	-42.18		10.59	-34.438		10.5915	-36.448
10.6319	-36.864		10.6233	-38.574		10.6239	-39.852		10.6163	-45.542		10.6163	-45.542		10.6248	-42.16		10.6317	-34.421		10.6331	-36.429
10.6735	-36.846		10.6649	-38.559		10.6656	-39.834		10.658	-45.518		10.658	-45.518		10.6731	-42.136		10.6733	-34.405		10.6748	-36.412
10.7152	-36.829		10.7066	-38.544		10.7073	-39.816		10.6996	-45.496		10.6996	-45.496		10.7148	-42.117		10.715	-34.389		10.7165	-36.396
10.7569	-36.814		10.7483	-38.531		10.7489	-39.8		10.7413	-45.476		10.7413	-45.476		10.7564	-42.098		10.7567	-34.374		10.7581	-36.38
10.7985	-36.798		10.7899	-38.518		10.7906	-39.785		10.783	-45.457		10.783	-45.457		10.7981	-42.08		10.7983	-34.358		10.8065	-36.362
10.8402	-36.783		10.8316	-38.504		10.8323	-39.77		10.8246	-45.438		10.8246	-45.438		10.8398	-42.064		10.84	-34.343		10.8481	-36.348
10.8819	-36.77		10.8733	-38.492		10.874	-39.757		10.8663	-45.42		10.8663	-45.42		10.8814	-42.047		10.8817	-34.328		10.8898	-36.334
10.9236	-36.757		10.9149	-38.479		10.9156	-39.743		10.908	-45.403		10.908	-45.403		10.9231	-42.032		10.9234	-34.313		10.9315	-36.321
10.9652	-36.745		10.9566	-38.467		10.9573	-39.73		10.9496	-45.387		10.9496	-45.387		10.9648	-42.017		10.965	-34.298		10.9732	-36.308
11.0069	-36.734		10.9983	-38.454		10.999	-39.717		10.9913	-45.37		10.9913	-45.37		11.0064	-42.002		11.0067	-34.284		11.0148	-36.295
11.0486	-36.722		11.0399	-38.442		11.0406	-39.704		11.033	-45.354		11.033	-45.354		11.0481	-41.987		11.0484	-34.27		11.0565	-36.283
11.0902	-36.711		11.0816	-38.431		11.0823	-39.691		11.0746	-45.338		11.0746	-45.338		11.0898	-41.973		11.09	-34.257		11.0982	-36.271
11.1319	-36.701		11.1233	-38.421		11.124	-39.679		11.1163	-45.321		11.1163	-45.321		11.1315	-41.959		11.1317	-34.244		11.1398	-36.258
11.1736	-36.689		11.1649	-38.411		11.1656	-39.667		11.158	-45.305		11.158	-45.305		11.1731	-41.945		11.1734	-34.232		11.1815	-36.246
11.2152	-36.678		11.2066	-38.401		11.2073	-39.655		11.1997	-45.288		11.1997	-45.288		11.2148	-41.93		11.215	-34.221		11.2232	-36.234
11.2569	-36.668		11.2483	-38.392		11.249	-39.643		11.2413	-45.272		11.2413	-45.272		11.2565	-41.916		11.2567	-34.21		11.2648	-36.222
11.2986	-36.656		11.2899	-38.383		11.2906	-39.631		11.283	-45.257		11.283	-45.257		11.2981	-41.902		11.2984	-34.199		11.3065	-36.21
11.3402	-36.646		11.3316	-38.374		11.3323	-39.62		11.3247	-45.243		11.3247	-45.243		11.3398	-41.889		11.34	-34.19		11.3482	-36.199
11.3819	-36.636		11.3733	-38.366		11.374	-39.609		11.3663	-45.23		11.3663	-45.23		11.3815	-41.877		11.3817	-34.18		11.3898	-36.189
11.4236	-36.627		11.4149	-38.359		11.4156	-39.6		11.408	-45.217		11.408	-45.217		11.4231	-41.865		11.4234	-34.171		11.4315	-36.178
11.4652	-36.618		11.4566	-38.351		11.4573	-39.59		11.4497	-45.205		11.4497	-45.205		11.4648	-41.855		11.4651	-34.162		11.4732	-36.169
11.5069	-36.61		11.4983	-38.344		11.499	-39.581		11.4913	-45.192		11.4913	-45.192		11.5065	-41.845		11.5067	-34.153		11.5148	-36.16
11.5486	-36.601		11.54	-38.337		11.5406	-39.573		11.533	-45.18		11.533	-45.18		11.5481	-41.836		11.5484	-34.144		11.5565	-36.151
11.5902	-36.594		11.5816	-38.33		11.5823	-39.565		11.5747	-45.168		11.5747	-45.168		11.5898	-41.826		11.5901	-34.136		11.5982	-36.143
11.6319	-36.587		11.6233	-38.323		11.624	-39.557		11.6163	-45.156		11.6163	-45.156		11.6315	-41.817		11.6317	-34.128		11.6398	-36.135
11.6736	-36.581		11.665	-38.316		11.6656	-39.55		11.658	-45.144		11.658	-45.144		11.6731	-41.807		11.6734	-34.12		11.6815	-36.126
11.7152	-36.574		11.7066	-38.309		11.7073	-39.542		11.6997	-45.132		11.6997	-45.132		11.7148	-41.798		11.7151	-34.113		11.7232	-36.118
11.7569	-36.567		11.7483	-38.302		11.749	-39.535		11.748	-45.117		11.748	-45.117		11.7565	-41.789		11.7567	-34.105		11.7648	-36.109
11.7986	-36.56		11.7899	-38.296		11.7906	-39.528		11.7897	-45.106		11.7897	-45.106		11.7981	-41.78		11.7984	-34.098		11.8065	-36.101
11.8402	-36.553		11.8316	-38.29		11.8323	-39.52		11.8313	-45.095		11.8313	-45.095		11.8398	-41.771		11.84	-34.09		11.8482	-36.092
11.8819	-36.546		11.8733	-38.284		11.874	-39.513		11.873	-45.084		11.873	-45.084		11.8815	-41.763		11.8817	-34.083		11.8898	-36.085
11.9236	-36.539		11.9149	-38.279		11.9156	-39.506		11.9147	-45.074		11.9147	-45.074		11.9231	-41.754		11.9234	-34.077		11.9315	-36.077
11.9652	-36.532		11.9566	-38.275		11.9573	-39.499		11.9563	-45.064		11.9563	-45.064		11.9648	-41.746		11.965	-34.071		11.9732	-36.07
12.0069	-36.526		11.9983	-38.27		11.999	-39.493		11.998	-45.055		11.998	-45.055		12.0065	-41.738		12.0067	-34.064		12.0148	-36.063
12.0486	-36.519		12.04	-38.266		12.0406	-39.487		12.0397	-45.046		12.0397	-45.046		12.0481	-41.73		12.0484	-34.058		12.0565	-36.057
12.0902	-36.513		12.0816	-38.263		12.0823	-39.482		12.0813	-45.038		12.0813	-45.038		12.0898	-41.724		12.0901	-34.052		12.0982	-36.051
12.1319	-36.507		12.1233	-38.259		12.124	-39.477		12.123	-45.029		12.123	-45.029		12.1315	-41.717		12.1317	-34.045		12.1398	-36.045
12.1736	-36.502		12.165	-38.256		12.1656	-39.472		12.1647	-45.02		12.1647	-45.02		12.1731	-41.711		12.1734	-34.039		12.1815	-36.04
12.2152	-36.497		12.2066	-38.252		12.2073	-39.468		12.2063	-45.011		12.2063	-45.011		12.2148	-41.705		12.2151	-34.033		12.2232	-36.035
12.2569	-36.493		12.2483	-38.249		12.249	-39.464		12.248	-45.003		12.248	-45.003		12.2565	-41.698		12.2567	-34.027		12.2648	-36.029
12.2986	-36.489		12.29	-38.246		12.2906	-39.459		12.2897	-44.994		12.2897	-44.994		12.2981	-41.692		12.2984	-34.021		12.3065	-36.025
12.3402	-36.485		12.3316	-38.242		12.3323	-39.455		12.3313	-44.986		12.3313	-44.986		12.3398	-41.685		12.3401	-34.016		12.3482	-36.019
12.3819	-36.482		12.3733	-38.239		12.374	-39.451		12.373	-44.978		12.373	-44.978		12.3815	-41.679		12.3817	-34.011		12.3898	-36.015
12.4236	-36.478		12.415	-38.236		12.4156	-39.447		12.4147	-44.971		12.4147	-44.971		12.4231	-41.673		12.4234	-34.006		12.4315	-36.009
12.4652	-36.475		12.4566	-38.233		12.4573	-39.443		12.4563	-44.964		12.4563	-44.964		12.4648	-41.667		12.4651	-34.001		12.4732	-36.005
12.5069	-36.472		12.4983	-38.23		12.499	-39.439		12.498	-44.956		12.498	-44.956		12.5065	-41.66		12.5067	-33.997		12.5149	-36
12.5486	-36.468		12.54	-38.228		12.5406	-39.435		12.5397	-44.949		12.5397	-44.949		12.5481	-41.654		12.5484	-33.994		12.5565	-35.996
12.5902	-36.464		12.5816	-38.225		12.5823	-39.431		12.5813	-44.943		12.5813	-44.943		12.5898	-41.648		12.5901	-33.99		12.5982	-35.991
12.6319	-36.461		12.6233	-38.223		12.624	-39.427		12.623	-44.937		12.623	-44.937		12.6315	-41.642		12.6317	-33.987		12.6398	-35.987
12.6736	-36.457		12.665	-38.221		12.6656	-39.423		12.6647	-44.931		12.6647	-44.931		12.6731	-41.637		12.6734	-33.984		12.6815	-35.983
12.7152	-36.453		12.7066	-38.219		12.7073	-39.42		12.7063	-44.925		12.7063	-44.925		12.7148	-41.632		12.7151	-33.981		12.7232	-35.98
12.7569	-36.449		12.7483	-38.218		12.749	-39.417		12.748	-44.918		12.748	-44.918		12.7565	-41.627		12.7567	-33.978		12.7648	-35.976
12.7986	-36.446		12.79	-38.216		12.7906	-39.414		12.7897	-44.912		12.7897	-44.912		12.7981	-41.623		12.7984	-33.976		12.8065	-35.973
12.8402	-36.443		12.8316	-38.215		12.8323	-39.411		12.8313	-44.906		12.8313	-44.906		12.8398	-41.619		12.8401	-33.973		12.8482	-35.97
12.8819	-36.44		12.8733	-38.213		12.874	-39.409		12.873	-44.9		12.873	-44.9		12.8815	-41.615		12.8817	-33.97		12.8898	-35.967
12.9236	-36.437		12.915	-38.212		12.9156	-39.407		12.9147	-44.893		12.9147	-44.893		12.9231	-41.61		12.9234	-33.967		12.9315	-35.965
12.9652	-36.434		12.9566	-38.211		12.9573	-39.405		12.9563	-44.887		12.9563	-44.887		12.9648	-41.606		12.9651	-33.964		12.9732	-35.962
13.0069	-36.432		12.9983	-38.209		12.999	-39.403		12.998	-44.881		12.998	-44.881		13.0065	-41.602		13.0067	-33.961		13.0148	-35.959
13.0486	-36.43		13.04	-38.208		13.0406	-39.401		13.0397	-44.875		13.0397	-44.875		13.0481	-41.598		13.0484	-33.958		13.0565	-35.956
13.0902	-36.428		13.0816	-38.207		13.0823	-39.399		13.0813	-44.869		13.0813	-44.869		13.0898	-41.593		13.0901	-33.955		13.0982	-35.953
13.1319	-36.426		13.1233	-38.206		13.124	-39.397		13.123	-44.864		13.123	-44.864		13.1315	-41.59		13.1318	-33.953		13.1398	-35.951
13.1736	-36.423		13.165	-38.204		13.1656	-39.395		13.1647	-44.859		13.1647	-44.859		13.1732	-41.586		13.1734	-33.95		13.1815	-35.948
13.2152	-36.421		13.2066	-38.203		13.2073	-39.393		13.2063	-44.854		13.2063	-44.854		13.2148	-41.582		13.2151	-33.948		13.2232	-35.945
13.2569	-36.419		13.2483	-38.202		13.249	-39.391		13.248	-44.85		13.248	-44.85		13.2565	-41.579		13.2567	-33.946		13.2648	-35.942
13.2986	-36.417		13.29	-38.201		13.2906	-39.389		13.2897	-44.846		13.2897	-44.846		13.2981	-41.576		13.2984	-33.944		13.3065	-35.939
13.3402	-36.415		13.3316	-38.2		13.3323	-39.387		13.3313	-44.841		13.3313	-44.841		13.3398	-41.573		13.3401	-33.942		13.3482	-35.937
13.3819	-36.412		13.3733	-38.2		13.374	-39.386		13.373	-44.837		13.373	-44.837		13.3815	-41.57		13.3817	-33.94		13.3898	-35.934
13.4236	-36.41		13.415	-38.199		13.4156	-39.384		13.4147	-44.832		13.4147	-44.832		13.4232	-41.567		13.4234	-33.939		13.4315	-35.932
13.4652	-36.408		13.4566	-38.199		13.4573	-39.383		13.4563	-44.828		13.4563	-44.828		13.4648	-41.564		13.4651	-33.937		13.4732	-35.93
13.5069	-36.407		13.4983	-38.198		13.499	-39.382		13.498	-44.823		13.498	-44.823		13.5065	-41.562		13.5067	-33.935		13.5148	-35.928
13.5569	-36.405		13.54	-38.198		13.5406	-39.381		13.5397	-44.818		13.5397	-44.818		13.5481	-41.559		13.5484	-33.933		13.5565	-35.926
13.5986	-36.404		13.5816	-38.198		13.5823	-39.38		13.5813	-44.814		13.5813	-44.814		13.5898	-41.557		13.5901	-33.931		13.5982	-35.924
13.6402	-36.403		13.6233	-38.197		13.624	-39.379		13.623	-44.809		13.623	-44.809		13.6315	-41.554		13.6317	-33.929		13.6398	-35.923
13.6819	-36.402		13.665	-38.197		13.6656	-39.379		13.6647	-44.805		13.6647	-44.805		13.6731	-41.551		13.6734	-33.927		13.6815	-35.921
13.7236	-36.401		13.7066	-38.197		13.7073	-39.378		13.7063	-44.801		13.7063	-44.801		13.7148	-41.548		13.7151	-33.926		13.7232	-35.919
13.7652	-36.4		13.7483	-38.197		13.749	-39.377		13.748	-44.797		13.748	-44.797		13.7565	-41.546		13.7567	-33.924		13.7648	-35.918
13.8069	-36.399		13.79	-38.196		13.7906	-39.376		13.7897	-44.793		13.7897	-44.793		13.7981	-41.543		13.7984	-33.922		13.8065	-35.916
13.8486	-36.398		13.8316	-38.196		13.8323	-39.376		13.8313	-44.79		13.8313	-44.79		13.8398	-41.54		13.8401	-33.921		13.8482	-35.914
13.8902	-36.397		13.8733	-38.196		13.874	-39.375		13.873	-44.786		13.873	-44.786		13.8815	-41.537		13.8817	-33.92		13.8898	-35.913
13.9319	-36.396		13.915	-38.196		13.9156	-39.374		13.9147	-44.782		13.9147	-44.782		13.9231	-41.535		13.9234	-33.918		13.9315	-35.911
13.9736	-36.396		13.9566	-38.196		13.9573	-39.374		13.9563	-44.779		13.9563	-44.779		13.9648	-41.533		13.9651	-33.917		13.9732	-35.91
14.0152	-36.395		13.9983	-38.195		13.999	-39.373		13.998	-44.775		13.998	-44.775		14.0065	-41.531		14.0067	-33.916		14.0148	-35.909
14.0569	-36.393		14.04	-38.195		14.0406	-39.372		14.0397	-44.772		14.0397	-44.772		14.0481	-41.529		14.0484	-33.915		14.0565	-35.908
14.0986	-36.392		14.0816	-38.195		14.0823	-39.372		14.0813	-44.768		14.0813	-44.768		14.0898	-41.527		14.0901	-33.914		14.0982	-35.907
14.1402	-36.391		14.1233	-38.195		14.124	-39.371		14.123	-44.765		14.123	-44.765		14.1315	-41.526		14.1317	-33.914		14.1398	-35.906
14.1819	-36.39		14.165	-38.195		14.1656	-39.371		14.1647	-44.761		14.1647	-44.761		14.1731	-41.524		14.1734	-33.913		14.1815	-35.905
14.2236	-36.39		14.2066	-38.195		14.2073	-39.371		14.2063	-44.757		14.2063	-44.757		14.2148	-41.523		14.2151	-33.912		14.2232	-35.904
14.2652	-36.389		14.2483	-38.195		14.249	-39.37		14.248	-44.753		14.248	-44.753		14.2565	-41.521		14.2567	-33.911		14.2648	-35.903
14.3069	-36.388		14.29	-38.195		14.2906	-39.37		14.2897	-44.749		14.2897	-44.749		14.2981	-41.52		14.2984	-33.91		14.3065	-35.902
14.3486	-36.388		14.3316	-38.195		14.3323	-39.37		14.3313	-44.746		14.3313	-44.746		14.3398	-41.518		14.3401	-33.909		14.3482	-35.901
14.3902	-36.388		14.3733	-38.195		14.374	-39.37		14.373	-44.743		14.373	-44.743		14.3815	-41.517		14.3817	-33.909		14.3898	-35.901
14.4319	-36.387		14.415	-38.195		14.4156	-39.369		14.4147	-44.74		14.4147	-44.74		14.4231	-41.515		14.4234	-33.908		14.4315	-35.9
14.4736	-36.387		14.4566	-38.195		14.4573	-39.369		14.4563	-44.737		14.4563	-44.737		14.4648	-41.513		14.4651	-33.907		14.4732	-35.899
14.5152	-36.387		14.4983	-38.195		14.499	-39.369		14.498	-44.735		14.498	-44.735		14.5065	-41.512		14.5067	-33.907		14.5148	-35.898
14.5569	-36.387		14.54	-38.195		14.5406	-39.369		14.5397	-44.733		14.5397	-44.733		14.5481	-41.51		14.5484	-33.906		14.5565	-35.897
14.5986	-36.386		14.5816	-38.195		14.5823	-39.369		14.5813	-44.73		14.5813	-44.73		14.5898	-41.509		14.5901	-33.905		14.5982	-35.896
14.6402	-36.386		14.6233	-38.195		14.624	-39.368		14.623	-44.728		14.623	-44.728		14.6315	-41.508		14.6317	-33.905		14.6398	-35.895
14.6819	-36.386		14.665	-38.195		14.6656	-39.368		14.6647	-44.725		14.6647	-44.725		14.6731	-41.507		14.6734	-33.904		14.6815	-35.894
14.7236	-36.386		14.7066	-38.195		14.7073	-39.368		14.7063	-44.722		14.7063	-44.722		14.7148	-41.506		14.7151	-33.904		14.7232	-35.893
14.7652	-36.385		14.7483	-38.195		14.749	-39.368		14.748	-44.719		14.748	-44.719		14.7565	-41.505		14.7567	-33.904		14.7648	-35.893
14.8069	-36.385		14.79	-38.195		14.7906	-39.368		14.7897	-44.716		14.7897	-44.716		14.7981	-41.504		14.7984	-33.903		14.8065	-35.892
14.8486	-36.385		14.8316	-38.195		14.8323	-39.368		14.8313	-44.713		14.8313	-44.713		14.8398	-41.503		14.8401	-33.903		14.8482	-35.892
14.8902	-36.385		14.8733	-38.195		14.874	-39.368		14.873	-44.711		14.873	-44.711		14.8815	-41.502		14.8817	-33.903		14.8898	-35.891
14.9319	-36.384		14.9149	-38.195		14.9156	-39.367		14.9147	-44.708		14.9147	-44.708		14.9231	-41.501		14.9234	-33.902		14.9315	-35.891
14.9736	-36.384		14.9566	-38.195		14.9573	-39.367		14.9563	-44.706		14.9563	-44.706		14.9648	-41.5		14.9651	-33.902		14.9732	-35.89
15.0152	-36.384		14.9983	-38.195		14.999	-39.367		14.998	-44.703		14.998	-44.703		15.0065	-41.499		15.0067	-33.901		15.0148	-35.89
15.0569	-36.384		15.04	-38.196		15.0406	-39.367		15.0397	-44.701		15.0397	-44.701		15.0481	-41.498		15.0484	-33.901		15.0565	-35.89
15.0986	-36.384		15.0816	-38.196		15.0823	-39.367		15.0813	-44.699		15.0813	-44.699		15.0898	-41.497		15.0901	-33.901		15.0982	-35.889
15.1402	-36.384		15.1233	-38.196		15.124	-39.367		15.123	-44.698		15.123	-44.698		15.1315	-41.496		15.1317	-33.9		15.1398	-35.889
15.1819	-36.383		15.165	-38.196		15.1656	-39.367		15.1647	-44.696		15.1647	-44.696		15.1731	-41.495		15.1734	-33.9		15.1815	-35.889
15.2236	-36.383		15.2066	-38.196		15.2073	-39.367		15.2063	-44.694		15.2063	-44.694		15.2148	-41.494		15.2151	-33.9		15.2232	-35.888
15.2652	-36.383		15.2483	-38.197		15.249	-39.367		15.248	-44.692		15.248	-44.692		15.2565	-41.493		15.2567	-33.9		15.2648	-35.888
15.3069	-36.383		15.2899	-38.197		15.2906	-39.367		15.2897	-44.69		15.2897	-44.69		15.2981	-41.492		15.2984	-33.899		15.3065	-35.888
15.3486	-36.383		15.3316	-38.197		15.3323	-39.367		15.3313	-44.688		15.3313	-44.688		15.3398	-41.491		15.3401	-33.899		15.3482	-35.887
15.3902	-36.383		15.3733	-38.197		15.374	-39.367		15.373	-44.686		15.373	-44.686		15.3815	-41.49		15.3817	-33.899		15.3898	-35.887
15.4319	-36.383		15.4149	-38.198		15.4156	-39.367		15.4147	-44.684		15.4147	-44.684		15.4231	-41.49		15.4234	-33.899		15.4315	-35.887
15.4736	-36.383		15.4566	-38.198		15.4573	-39.367		15.4563	-44.682		15.4563	-44.682		15.4648	-41.489		15.465	-33.898		15.4732	-35.887
15.5152	-36.382		15.4983	-38.198		15.499	-39.367		15.498	-44.68		15.498	-44.68		15.5065	-41.489		15.5067	-33.898		15.5148	-35.887
15.5569	-36.382		15.5399	-38.199		15.5406	-39.367		15.5397	-44.677		15.5397	-44.677		15.5481	-41.488		15.5484	-33.898		15.5565	-35.886
15.5986	-36.382		15.5816	-38.199		15.5823	-39.367		15.5813	-44.675		15.5813	-44.675		15.5898	-41.487		15.59	-33.898		15.5982	-35.886
15.6402	-36.382		15.6233	-38.2		15.624	-39.367		15.623	-44.673		15.623	-44.673		15.6315	-41.487		15.6317	-33.898		15.6398	-35.886
15.6819	-36.382		15.6649	-38.201		15.6656	-39.367		15.6646	-44.671		15.6646	-44.671		15.6731	-41.486		15.6734	-33.897		15.6815	-35.886
15.7236	-36.382		15.7066	-38.202		15.7073	-39.367		15.7063	-44.67		15.7063	-44.67		15.7148	-41.486		15.715	-33.897		15.7232	-35.886
15.7652	-36.382		15.7483	-38.203		15.749	-39.367		15.748	-44.668		15.748	-44.668		15.7565	-41.485		15.7567	-33.897		15.7648	-35.885
15.8069	-36.382		15.7899	-38.204		15.7906	-39.367		15.7896	-44.667		15.7896	-44.667		15.7981	-41.484		15.7984	-33.897		15.8065	-35.885
15.8486	-36.382		15.8316	-38.205		15.8323	-39.368		15.8313	-44.665		15.8313	-44.665		15.8398	-41.484		15.84	-33.897		15.8482	-35.885
15.8902	-36.382		15.8733	-38.206		15.874	-39.368		15.873	-44.664		15.873	-44.664		15.8815	-41.483		15.8817	-33.897		15.8898	-35.885
15.9319	-36.382		15.9149	-38.207		15.9156	-39.368		15.9146	-44.662		15.9146	-44.662		15.9231	-41.482		15.9234	-33.896		15.9315	-35.885
15.9736	-36.382		15.9566	-38.208		15.9573	-39.368		15.9563	-44.661		15.9563	-44.661		15.9648	-41.482		15.965	-33.896		15.9732	-35.884
16.0152	-36.382		15.9983	-38.21		15.999	-39.368		15.998	-44.659		15.998	-44.659		16.0065	-41.481		16.0067	-33.896		16.0148	-35.884
16.0569	-36.382		16.0399	-38.211		16.0406	-39.368		16.0397	-44.657		16.0397	-44.657		16.0481	-41.481		16.0484	-33.896		16.0565	-35.884
16.0985	-36.382		16.0816	-38.212		16.0823	-39.368		16.0813	-44.656		16.0813	-44.656		16.0898	-41.48		16.0901	-33.896		16.0982	-35.884
16.1402	-36.382		16.1233	-38.213		16.1239	-39.369		16.123	-44.654		16.123	-44.654		16.1315	-41.48		16.1317	-33.896		16.1398	-35.884
16.1819	-36.382		16.1649	-38.214		16.1656	-39.369		16.1647	-44.652		16.1647	-44.652		16.1731	-41.48		16.1734	-33.896		16.1815	-35.883
16.2236	-36.382		16.2066	-38.216		16.2073	-39.369		16.2063	-44.651		16.2063	-44.651		16.2148	-41.48		16.2151	-33.896		16.2231	-35.883
16.2652	-36.382		16.2483	-38.217		16.2489	-39.369		16.248	-44.649		16.248	-44.649		16.2565	-41.479		16.2567	-33.896		16.2648	-35.883
16.3069	-36.382		16.2899	-38.219		16.2906	-39.369		16.2897	-44.648		16.2897	-44.648		16.2981	-41.479		16.2984	-33.896		16.3065	-35.883
16.3485	-36.382		16.3316	-38.221		16.3323	-39.369		16.3313	-44.646		16.3313	-44.646		16.3398	-41.479		16.3401	-33.896		16.3481	-35.883
16.3902	-36.382		16.3733	-38.223		16.3806	-39.37		16.373	-44.645		16.373	-44.645		16.3815	-41.478		16.3817	-33.896		16.3898	-35.883
16.4319	-36.382		16.4149	-38.225		16.4223	-39.37		16.4147	-44.644		16.4147	-44.644		16.4231	-41.478		16.4234	-33.896		16.4315	-35.883
16.4735	-36.382		16.4566	-38.227		16.464	-39.37		16.4563	-44.643		16.4563	-44.643		16.4648	-41.478		16.4651	-33.895		16.4731	-35.883
16.5152	-36.382		16.4983	-38.23		16.5056	-39.37		16.498	-44.642		16.498	-44.642		16.5065	-41.477		16.5067	-33.895		16.5148	-35.883
16.5569	-36.382		16.5399	-38.233		16.5473	-39.371		16.5396	-44.641		16.5396	-44.641		16.5481	-41.477		16.5484	-33.895		16.5565	-35.883
16.5985	-36.382		16.5816	-38.235		16.5889	-39.371		16.5813	-44.639		16.5813	-44.639		16.5898	-41.477		16.5901	-33.895		16.5981	-35.883
16.6402	-36.382		16.6233	-38.238		16.6306	-39.371		16.623	-44.638		16.623	-44.638		16.6315	-41.476		16.6317	-33.895		16.6398	-35.883
16.6819	-36.382		16.6649	-38.24		16.6723	-39.372		16.6646	-44.637		16.6646	-44.637		16.6731	-41.476		16.6734	-33.895		16.6815	-35.883
16.7235	-36.382		16.7066	-38.243		16.7139	-39.372		16.7063	-44.635		16.7063	-44.635		16.7148	-41.476		16.7151	-33.895		16.7231	-35.883
16.7652	-36.382		16.7483	-38.246		16.7556	-39.373		16.748	-44.634		16.748	-44.634		16.7565	-41.476		16.7567	-33.895		16.7648	-35.882
16.8069	-36.382		16.7899	-38.248		16.7973	-39.373		16.7896	-44.632		16.7896	-44.632		16.7981	-41.475		16.7984	-33.895		16.8065	-35.882
16.8485	-36.382		16.8316	-38.251		16.8389	-39.373		16.8313	-44.631		16.8313	-44.631		16.8398	-41.475		16.8401	-33.895		16.8481	-35.882
16.8902	-36.382		16.8732	-38.253		16.8806	-39.374		16.873	-44.629		16.873	-44.629		16.8815	-41.475		16.8817	-33.895		16.8898	-35.882
16.9319	-36.382		16.9149	-38.256		16.9223	-39.374		16.9147	-44.628		16.9147	-44.628		16.9231	-41.475		16.9234	-33.895		16.9315	-35.882
16.9735	-36.382		16.9566	-38.259		16.9639	-39.375		16.9563	-44.627		16.9563	-44.627		16.9648	-41.475		16.965	-33.895		16.9731	-35.882
17.0152	-36.382		16.9982	-38.262		17.0056	-39.376		16.998	-44.626		16.998	-44.626		17.0064	-41.474		17.0067	-33.895		17.0148	-35.882
17.0569	-36.382		17.0399	-38.265		17.0473	-39.376		17.0396	-44.625		17.0396	-44.625		17.0481	-41.474		17.0484	-33.895		17.0565	-35.882
17.0985	-36.382		17.0816	-38.268		17.0889	-39.377		17.0813	-44.624		17.0813	-44.624		17.0898	-41.474		17.09	-33.895		17.0981	-35.882
17.1402	-36.382		17.1233	-38.271		17.1306	-39.378		17.123	-44.623		17.123	-44.623		17.1314	-41.474		17.1317	-33.895		17.1398	-35.882
17.1819	-36.383		17.1649	-38.275		17.1723	-39.379		17.1646	-44.622		17.1646	-44.622		17.1731	-41.474		17.1734	-33.895		17.1815	-35.882
17.2235	-36.383		17.2066	-38.279		17.2139	-39.38		17.2063	-44.621		17.2063	-44.621		17.2148	-41.473		17.2151	-33.895		17.2231	-35.882
17.2652	-36.383		17.2483	-38.282		17.2556	-39.381		17.248	-44.62		17.248	-44.62		17.2564	-41.473		17.2567	-33.895		17.2648	-35.882
17.3069	-36.383		17.2899	-38.286		17.2973	-39.383		17.2896	-44.62		17.2896	-44.62		17.2981	-41.473		17.2984	-33.895		17.3065	-35.882
17.3485	-36.383		17.3316	-38.289		17.3389	-39.384		17.3313	-44.619		17.3313	-44.619		17.3398	-41.473		17.34	-33.896		17.3481	-35.882
17.3902	-36.383		17.3732	-38.293		17.3806	-39.385		17.373	-44.618		17.373	-44.618		17.3814	-41.473		17.3817	-33.896		17.3898	-35.882
17.4319	-36.384		17.4149	-38.296		17.4223	-39.386		17.4146	-44.617		17.4146	-44.617		17.4231	-41.473		17.4234	-33.896		17.4315	-35.882
17.4735	-36.384		17.4566	-38.3		17.4639	-39.387		17.4563	-44.616		17.4563	-44.616		17.4648	-41.472		17.465	-33.896		17.4731	-35.882
17.5152	-36.384		17.4982	-38.303		17.5056	-39.388		17.498	-44.615		17.498	-44.615		17.5064	-41.472		17.5067	-33.896		17.5148	-35.882
17.5569	-36.384		17.5399	-38.306		17.5473	-39.39		17.5396	-44.614		17.5396	-44.614		17.5481	-41.472		17.5484	-33.896		17.5565	-35.883
17.5985	-36.384		17.5816	-38.309		17.5889	-39.391		17.5813	-44.613		17.5813	-44.613		17.5898	-41.472		17.59	-33.896		17.5981	-35.883
17.6402	-36.385		17.6232	-38.312		17.6306	-39.392		17.623	-44.612		17.623	-44.612		17.6314	-41.472		17.6317	-33.896		17.6398	-35.883
17.6819	-36.385		17.6649	-38.315		17.6723	-39.393		17.6646	-44.611		17.6646	-44.611		17.6731	-41.472		17.6734	-33.897		17.6815	-35.883
17.7235	-36.385		17.7066	-38.317		17.7139	-39.395		17.7063	-44.61		17.7063	-44.61		17.7148	-41.472		17.715	-33.897		17.7231	-35.883
17.7652	-36.385		17.7482	-38.32		17.7556	-39.396		17.748	-44.61		17.748	-44.61		17.7564	-41.471		17.7567	-33.897		17.7648	-35.883
17.8069	-36.385		17.7899	-38.323		17.7973	-39.398		17.7896	-44.609		17.7896	-44.609		17.7981	-41.471		17.7984	-33.897		17.8065	-35.883
17.8485	-36.386		17.8316	-38.326		17.8389	-39.399		17.8313	-44.609		17.8313	-44.609		17.8398	-41.471		17.84	-33.897		17.8481	-35.883
17.8902	-36.386		17.8732	-38.33		17.8806	-39.401		17.873	-44.608		17.873	-44.608		17.8814	-41.471		17.8817	-33.897		17.8898	-35.883
17.9319	-36.386		17.9149	-38.333		17.9223	-39.403		17.9146	-44.607		17.9146	-44.607		17.9231	-41.471		17.9234	-33.898		17.9315	-35.883
17.9735	-36.387		17.9566	-38.337		17.9639	-39.405		17.9563	-44.606		17.9563	-44.606		17.9648	-41.471		17.965	-33.898		17.9731	-35.883
18.0152	-36.387		17.9982	-38.341		18.0056	-39.407		17.998	-44.606		17.998	-44.606		18.0064	-41.471		18.0067	-33.898		18.0148	-35.883
18.0569	-36.388		18.0399	-38.345		18.0473	-39.409		18.0396	-44.605		18.0396	-44.605		18.0481	-41.471		18.0484	-33.898		18.0565	-35.883
18.0985	-36.388		18.0816	-38.349		18.0889	-39.411		18.0813	-44.604		18.0813	-44.604		18.0898	-41.47		18.09	-33.898		18.0981	-35.883
18.1402	-36.389		18.1232	-38.353		18.1306	-39.414		18.123	-44.603		18.123	-44.603		18.1314	-41.47		18.1317	-33.898		18.1398	-35.884
18.1819	-36.389		18.1649	-38.358		18.1723	-39.416		18.1646	-44.603		18.1646	-44.603		18.1731	-41.47		18.1734	-33.899		18.1815	-35.884
18.2235	-36.39		18.2066	-38.362		18.2139	-39.418		18.2063	-44.602		18.2063	-44.602		18.2148	-41.47		18.215	-33.899		18.2231	-35.884
18.2652	-36.39		18.2482	-38.366		18.2556	-39.42		18.248	-44.601		18.248	-44.601		18.2564	-41.47		18.2567	-33.899		18.2648	-35.884
18.3069	-36.39		18.2899	-38.37		18.2973	-39.422		18.2896	-44.6		18.2896	-44.6		18.2981	-41.47		18.2984	-33.9		18.3065	-35.884
18.3485	-36.391		18.3316	-38.374		18.3389	-39.424		18.3313	-44.6		18.3313	-44.6		18.3398	-41.47		18.34	-33.9		18.3481	-35.884
18.3902	-36.391		18.3733	-38.378		18.3806	-39.426		18.373	-44.599		18.373	-44.599		18.3814	-41.47		18.3817	-33.901		18.3898	-35.885
18.4319	-36.392		18.4149	-38.381		18.4223	-39.428		18.4146	-44.599		18.4146	-44.599		18.4231	-41.47		18.4234	-33.901		18.4315	-35.885
18.4735	-36.393		18.4566	-38.385		18.4639	-39.43		18.4563	-44.598		18.4563	-44.598		18.4648	-41.47		18.465	-33.901		18.4731	-35.885
18.5152	-36.393		18.4982	-38.388		18.5056	-39.432		18.498	-44.598		18.498	-44.598		18.5064	-41.47		18.5067	-33.902		18.5148	-35.885
18.5569	-36.394		18.5399	-38.392		18.5473	-39.435		18.5396	-44.598		18.5396	-44.598		18.5481	-41.47		18.5484	-33.902		18.5565	-35.885
18.5985	-36.395		18.5816	-38.396		18.5889	-39.437		18.5813	-44.597		18.5813	-44.597		18.5898	-41.47		18.59	-33.903		18.5981	-35.885
18.6402	-36.396		18.6232	-38.399		18.6306	-39.44		18.623	-44.597		18.623	-44.597		18.6314	-41.47		18.6317	-33.903		18.6398	-35.886
18.6819	-36.397		18.6732	-38.404		18.6723	-39.442		18.6646	-44.596		18.6646	-44.596		18.6731	-41.47		18.6734	-33.903		18.6815	-35.886
18.7235	-36.398		18.7149	-38.408		18.7139	-39.445		18.7063	-44.596		18.7063	-44.596		18.7148	-41.47		18.715	-33.904		18.7231	-35.886
18.7652	-36.399		18.7566	-38.412		18.7556	-39.448		18.748	-44.595		18.748	-44.595		18.7564	-41.47		18.7567	-33.905		18.7648	-35.886
18.8069	-36.4		18.7982	-38.416		18.7973	-39.451		18.7896	-44.594		18.7896	-44.594		18.7981	-41.47		18.7984	-33.905		18.8065	-35.887
18.8485	-36.401		18.8399	-38.421		18.8389	-39.454		18.8313	-44.594		18.8313	-44.594		18.8398	-41.47		18.84	-33.906		18.8481	-35.887
18.8902	-36.401		18.8816	-38.425		18.8806	-39.456		18.873	-44.593		18.873	-44.593		18.8814	-41.47		18.8817	-33.907		18.8898	-35.887
18.9319	-36.402		18.9232	-38.429		18.9223	-39.459		18.9146	-44.593		18.9146	-44.593		18.9231	-41.47		18.9234	-33.907		18.9315	-35.887
18.9735	-36.403		18.9649	-38.434		18.9639	-39.462		18.9563	-44.593		18.9563	-44.593		18.9648	-41.47		18.965	-33.908		18.9731	-35.888
19.0152	-36.404		19.0066	-38.438		19.0056	-39.464		18.998	-44.592		18.998	-44.592		19.0064	-41.47		19.0067	-33.909		19.0148	-35.888
19.0569	-36.405		19.0482	-38.442		19.0473	-39.467		19.0396	-44.592		19.0396	-44.592		19.0481	-41.47		19.0484	-33.909		19.0565	-35.888
19.0985	-36.406		19.0899	-38.446		19.0889	-39.47		19.0813	-44.591		19.0813	-44.591		19.0898	-41.47		19.09	-33.91		19.0981	-35.889
19.1402	-36.408		19.1316	-38.45		19.1306	-39.472		19.123	-44.591		19.123	-44.591		19.1314	-41.47		19.1317	-33.911		19.1398	-35.889
19.1819	-36.409		19.1732	-38.453		19.1723	-39.475		19.1646	-44.591		19.1646	-44.591		19.1731	-41.47		19.1734	-33.912		19.1815	-35.889
19.2235	-36.41		19.2149	-38.457		19.2139	-39.478		19.2063	-44.59		19.2063	-44.59		19.2148	-41.47		19.215	-33.912		19.2231	-35.89
19.2652	-36.412		19.2566	-38.46		19.2556	-39.481		19.2479	-44.59		19.2479	-44.59		19.2564	-41.47		19.2567	-33.913		19.2648	-35.89
19.3069	-36.414		19.2982	-38.464		19.2973	-39.484		19.2896	-44.589		19.2896	-44.589		19.2981	-41.47		19.2983	-33.914		19.3065	-35.89
19.3485	-36.416		19.3399	-38.467		19.3389	-39.487		19.3313	-44.589		19.3313	-44.589		19.3398	-41.47		19.34	-33.914		19.3481	-35.891
19.3902	-36.417		19.3816	-38.47		19.3806	-39.49		19.3729	-44.588		19.3729	-44.588		19.3814	-41.47		19.3817	-33.915		19.3898	-35.891
19.4319	-36.419		19.4232	-38.474		19.4222	-39.493		19.4146	-44.588		19.4146	-44.588		19.4231	-41.47		19.4233	-33.916		19.4315	-35.891
19.4735	-36.421		19.4649	-38.477		19.4639	-39.496		19.4563	-44.587		19.4563	-44.587		19.4648	-41.47		19.465	-33.917		19.4731	-35.892
19.5152	-36.423		19.5066	-38.481		19.5056	-39.5		19.4979	-44.587		19.4979	-44.587		19.5064	-41.47		19.5067	-33.918		19.5148	-35.892
19.5569	-36.424		19.5482	-38.485		19.5472	-39.503		19.5396	-44.586		19.5396	-44.586		19.5481	-41.47		19.5484	-33.919		19.5565	-35.892
19.5985	-36.426		19.5899	-38.489		19.5889	-39.506		19.5813	-44.586		19.5813	-44.586		19.5898	-41.47		19.59	-33.92		19.5981	-35.893
19.6402	-36.428		19.6316	-38.493		19.6306	-39.509		19.623	-44.585		19.623	-44.585		19.6314	-41.47		19.6317	-33.921		19.6398	-35.893
19.6819	-36.43		19.6732	-38.497		19.6722	-39.512		19.6646	-44.585		19.6646	-44.585		19.6731	-41.47		19.6734	-33.922		19.6815	-35.894
19.7235	-36.431		19.7149	-38.501		19.7139	-39.515		19.7063	-44.584		19.7063	-44.584		19.7148	-41.47		19.715	-33.924		19.7231	-35.895
19.7652	-36.433		19.7566	-38.506		19.7556	-39.518		19.748	-44.584		19.748	-44.584		19.7564	-41.47		19.7567	-33.925		19.7648	-35.895
19.8069	-36.435		19.7982	-38.511		19.7972	-39.52		19.7896	-44.584		19.7896	-44.584		19.7981	-41.47		19.7984	-33.926		19.8065	-35.896
19.8485	-36.437		19.8399	-38.515		19.8389	-39.522		19.8313	-44.583		19.8313	-44.583		19.8398	-41.47		19.84	-33.927		19.8481	-35.897
19.8902	-36.439		19.8816	-38.519		19.8806	-39.525		19.873	-44.583		19.873	-44.583		19.8814	-41.47		19.8817	-33.929		19.8898	-35.898
19.9319	-36.441		19.9232	-38.523		19.9222	-39.527		19.9146	-44.583		19.9146	-44.583		19.9231	-41.47		19.9234	-33.93		19.9314	-35.899
19.9735	-36.443		19.9649	-38.528		19.9639	-39.53		19.9563	-44.582		19.9563	-44.582		19.9647	-41.47		19.9717	-33.932		19.9731	-35.9
20.0152	-36.445		20.0066	-38.532		20.0056	-39.533		19.9979	-44.582		19.9979	-44.582		20.0064	-41.47		20.0133	-33.933		20.0148	-35.9
20.0569	-36.447		20.0482	-38.536		20.0472	-39.536		20.0396	-44.581		20.0396	-44.581		20.0481	-41.47		20.055	-33.935		20.0564	-35.901
20.0985	-36.449		20.0899	-38.539		20.0889	-39.539		20.0813	-44.581		20.0813	-44.581		20.0897	-41.47		20.0967	-33.936		20.0981	-35.902
20.1402	-36.451		20.1316	-38.543		20.1306	-39.543		20.1229	-44.58		20.1229	-44.58		20.1314	-41.47		20.1383	-33.938		20.1398	-35.902
20.1819	-36.454		20.1732	-38.547		20.1722	-39.546		20.1646	-44.58		20.1646	-44.58		20.1731	-41.47		20.18	-33.939		20.1814	-35.903
20.2235	-36.456		20.2149	-38.551		20.2139	-39.55		20.2063	-44.58		20.2063	-44.58		20.2147	-41.47		20.2217	-33.941		20.2231	-35.903
20.2652	-36.458		20.2566	-38.555		20.2556	-39.553		20.2479	-44.579		20.2479	-44.579		20.2564	-41.47		20.2633	-33.942		20.2648	-35.904
20.3069	-36.46		20.2982	-38.559		20.2972	-39.557		20.2896	-44.579		20.2896	-44.579		20.2981	-41.47		20.305	-33.944		20.3064	-35.905
20.3485	-36.462		20.3399	-38.564		20.3389	-39.561		20.3313	-44.578		20.3313	-44.578		20.3397	-41.47		20.3467	-33.946		20.3481	-35.906
20.3902	-36.464		20.3816	-38.568		20.3806	-39.565		20.3729	-44.578		20.3729	-44.578		20.3814	-41.47		20.3883	-33.947		20.3898	-35.907
20.4319	-36.466		20.4232	-38.573		20.4222	-39.568		20.4146	-44.578		20.4146	-44.578		20.4231	-41.47		20.43	-33.949		20.4314	-35.908
20.4735	-36.468		20.4649	-38.577		20.4639	-39.572		20.4563	-44.577		20.4563	-44.577		20.4647	-41.47		20.4717	-33.951		20.4731	-35.909
20.5152	-36.469		20.5066	-38.582		20.5056	-39.575		20.4979	-44.577		20.4979	-44.577		20.5064	-41.47		20.5133	-33.952		20.5148	-35.91
20.5569	-36.471		20.5482	-38.586		20.5472	-39.579		20.5396	-44.577		20.5396	-44.577		20.5481	-41.47		20.555	-33.954		20.5564	-35.911
20.5985	-36.473		20.5899	-38.59		20.5889	-39.582		20.5813	-44.576		20.5813	-44.576		20.5897	-41.47		20.5967	-33.955		20.5981	-35.912
20.6402	-36.476		20.6316	-38.594		20.6306	-39.585		20.6229	-44.576		20.6229	-44.576		20.6314	-41.47		20.6383	-33.956		20.6398	-35.913
20.6819	-36.478		20.6732	-38.599		20.6722	-39.588		20.6646	-44.576		20.6646	-44.576		20.6731	-41.47		20.68	-33.957		20.6814	-35.915
20.7235	-36.481		20.7149	-38.604		20.7139	-39.591		20.7063	-44.575		20.7063	-44.575		20.7147	-41.47		20.7217	-33.959		20.7231	-35.916
20.7652	-36.483		20.7566	-38.609		20.7556	-39.594		20.7479	-44.575		20.7479	-44.575		20.7564	-41.47		20.7633	-33.96		20.7648	-35.917
20.8068	-36.485		20.7982	-38.613		20.7972	-39.598		20.7896	-44.574		20.7896	-44.574		20.7981	-41.47		20.805	-33.961		20.8064	-35.918
20.8485	-36.488		20.8399	-38.617		20.8389	-39.601		20.8313	-44.574		20.8313	-44.574		20.8397	-41.47		20.8467	-33.963		20.8481	-35.919
20.8902	-36.49		20.8815	-38.621		20.8806	-39.605		20.8729	-44.573		20.8729	-44.573		20.8814	-41.47		20.8883	-33.964		20.8897	-35.921
20.9318	-36.492		20.9232	-38.625		20.9222	-39.609		20.9146	-44.573		20.9146	-44.573		20.9231	-41.47		20.93	-33.965		20.9314	-35.922
20.9735	-36.494		20.9649	-38.628		20.9639	-39.613		20.9563	-44.572		20.9563	-44.572		20.9647	-41.47		20.9717	-33.967		20.9731	-35.923
21.0152	-36.496		21.0066	-38.631		21.0056	-39.617		20.9979	-44.572		20.9979	-44.572		21.0064	-41.47		21.0133	-33.968		21.0147	-35.924
21.0568	-36.498		21.0566	-38.636		21.0472	-39.621		21.0396	-44.571		21.0396	-44.571		21.0481	-41.47		21.055	-33.97		21.0564	-35.925
21.0985	-36.5		21.1049	-38.64		21.0889	-39.625		21.0813	-44.571		21.0813	-44.571		21.0897	-41.47		21.0967	-33.972		21.0981	-35.927
21.1402	-36.502		21.1466	-38.643		21.1306	-39.629		21.1229	-44.571		21.1229	-44.571		21.1314	-41.47		21.1383	-33.973		21.1397	-35.928
21.1818	-36.504		21.1882	-38.647		21.1722	-39.632		21.1646	-44.57		21.1646	-44.57		21.1731	-41.47		21.18	-33.975		21.1814	-35.93
21.2235	-36.505		21.2299	-38.651		21.2139	-39.636		21.2063	-44.57		21.2063	-44.57		21.2147	-41.47		21.2217	-33.976		21.2231	-35.932
21.2652	-36.507		21.2716	-38.655		21.2556	-39.64		21.2479	-44.57		21.2479	-44.57		21.2564	-41.47		21.2633	-33.978		21.2647	-35.933
21.3068	-36.508		21.3132	-38.66		21.2972	-39.643		21.2896	-44.569		21.2896	-44.569		21.2981	-41.47		21.305	-33.979		21.3064	-35.935
21.3485	-36.51		21.3549	-38.665		21.3389	-39.646		21.3313	-44.569		21.3313	-44.569		21.3397	-41.47		21.3467	-33.981		21.3481	-35.936
21.3902	-36.511		21.3966	-38.67		21.3806	-39.649		21.3729	-44.569		21.3729	-44.569		21.3814	-41.47		21.3883	-33.982		21.3897	-35.938
21.4318	-36.513		21.4382	-38.675		21.4222	-39.652		21.4146	-44.568		21.4146	-44.568		21.423	-41.47		21.43	-33.983		21.4314	-35.939
21.4802	-36.515		21.4799	-38.68		21.4639	-39.655		21.4563	-44.568		21.4563	-44.568		21.4647	-41.47		21.4717	-33.985		21.4731	-35.94
21.5218	-36.517		21.5215	-38.685		21.5056	-39.658		21.4979	-44.567		21.4979	-44.567		21.5064	-41.47		21.5133	-33.986		21.5147	-35.942
21.5635	-36.52		21.5632	-38.69		21.5472	-39.661		21.5396	-44.567		21.5396	-44.567		21.548	-41.47		21.555	-33.987		21.5564	-35.943
21.6052	-36.522		21.6049	-38.694		21.5889	-39.665		21.5813	-44.566		21.5813	-44.566		21.5897	-41.47		21.5967	-33.989		21.5981	-35.944
21.6468	-36.525		21.6465	-38.698		21.6306	-39.668		21.6229	-44.566		21.6229	-44.566		21.6314	-41.47		21.6383	-33.99		21.6397	-35.946
21.6885	-36.528		21.6882	-38.702		21.6722	-39.671		21.6646	-44.565		21.6646	-44.565		21.673	-41.47		21.68	-33.992		21.6814	-35.947
21.7302	-36.53		21.7299	-38.706		21.7139	-39.675		21.7063	-44.565		21.7063	-44.565		21.7147	-41.471		21.7217	-33.994		21.7231	-35.949
21.7718	-36.533		21.7715	-38.709		21.7556	-39.679		21.7479	-44.565		21.7479	-44.565		21.7564	-41.471		21.7633	-33.996		21.7647	-35.95
21.8135	-36.535		21.8132	-38.712		21.7972	-39.682		21.7896	-44.564		21.7896	-44.564		21.798	-41.471		21.805	-33.997		21.8064	-35.952
21.8552	-36.538		21.8549	-38.716		21.8389	-39.687		21.8313	-44.564		21.8313	-44.564		21.8464	-41.471		21.8466	-33.999		21.8481	-35.954
21.8968	-36.54		21.8965	-38.719		21.8806	-39.691		21.8729	-44.564		21.8729	-44.564		21.888	-41.471		21.8883	-34.001		21.8897	-35.956
21.9385	-36.541		21.9382	-38.723		21.9222	-39.695		21.9146	-44.563		21.9146	-44.563		21.9297	-41.471		21.93	-34.003		21.9314	-35.958
21.9802	-36.543		21.9799	-38.727		21.9639	-39.699		21.9563	-44.563		21.9563	-44.563		21.9714	-41.471		21.9717	-34.004		21.9797	-35.96
22.0218	-36.545		22.0215	-38.731		22.0056	-39.703		21.9979	-44.563		21.9979	-44.563		22.013	-41.471		22.0133	-34.006		22.0214	-35.962
22.0635	-36.547		22.0632	-38.736		22.0472	-39.708		22.0396	-44.562		22.0396	-44.562		22.0547	-41.471		22.055	-34.007		22.0631	-35.965
22.1051	-36.549		22.1049	-38.741		22.0889	-39.712		22.0896	-44.562		22.0896	-44.562		22.0964	-41.471		22.0966	-34.009		22.1131	-35.967
22.1468	-36.551		22.1465	-38.745		22.1305	-39.716		22.1313	-44.561		22.1313	-44.561		22.138	-41.471		22.1383	-34.01		22.1547	-35.969
22.1885	-36.554		22.1882	-38.75		22.1722	-39.719		22.1729	-44.561		22.1729	-44.561		22.1797	-41.471		22.18	-34.012		22.1964	-35.971
22.2302	-36.556		22.2299	-38.755		22.2139	-39.723		22.2146	-44.56		22.2146	-44.56		22.2214	-41.471		22.2216	-34.013		22.2381	-35.973
22.2718	-36.559		22.2715	-38.76		22.2555	-39.727		22.2563	-44.56		22.2563	-44.56		22.263	-41.471		22.2633	-34.014		22.2797	-35.975
22.3135	-36.562		22.3132	-38.764		22.2972	-39.73		22.2979	-44.559		22.2979	-44.559		22.3047	-41.471		22.305	-34.016		22.3214	-35.977
22.3551	-36.565		22.3549	-38.769		22.3389	-39.734		22.3396	-44.559		22.3396	-44.559		22.3464	-41.471		22.3466	-34.017		22.363	-35.979
22.3968	-36.567		22.3965	-38.773		22.3805	-39.737		22.3813	-44.558		22.3813	-44.558		22.388	-41.471		22.3883	-34.019		22.4047	-35.981
22.4385	-36.57		22.4382	-38.777		22.4222	-39.741		22.4229	-44.558		22.4229	-44.558		22.4297	-41.471		22.43	-34.021		22.4464	-35.982
22.4801	-36.572		22.4799	-38.782		22.4639	-39.745		22.4646	-44.558		22.4646	-44.558		22.4714	-41.472		22.4716	-34.022		22.4881	-35.984
22.5218	-36.574		22.5215	-38.786		22.5055	-39.749		22.5062	-44.557		22.5062	-44.557		22.513	-41.472		22.5133	-34.024		22.5297	-35.987
22.5635	-36.577		22.5632	-38.79		22.5472	-39.753		22.5479	-44.557		22.5479	-44.557		22.5547	-41.472		22.555	-34.026		22.5714	-35.989
22.6051	-36.579		22.6049	-38.793		22.5889	-39.757		22.5896	-44.557		22.5896	-44.557		22.5964	-41.472		22.5966	-34.029		22.6131	-35.991
22.6468	-36.58		22.6465	-38.796		22.6305	-39.761		22.6312	-44.556		22.6312	-44.556		22.638	-41.472		22.6383	-34.03		22.6547	-35.993
22.6885	-36.582		22.6882	-38.8		22.6722	-39.765		22.6729	-44.556		22.6729	-44.556		22.6797	-41.472		22.68	-34.032		22.6964	-35.996
22.7301	-36.583		22.7298	-38.805		22.7139	-39.769		22.7146	-44.555		22.7146	-44.555		22.7214	-41.472		22.7216	-34.034		22.7381	-35.998
22.7718	-36.585		22.7715	-38.809		22.7555	-39.772		22.7562	-44.555		22.7562	-44.555		22.763	-41.472		22.7633	-34.036		22.7797	-36.001
22.8135	-36.587		22.8132	-38.813		22.7972	-39.776		22.7979	-44.554		22.7979	-44.554		22.8047	-41.472		22.805	-34.038		22.8214	-36.003
22.8551	-36.588		22.8548	-38.817		22.8389	-39.78		22.8396	-44.554		22.8396	-44.554		22.8464	-41.472		22.8466	-34.04		22.863	-36.005
22.8968	-36.59		22.8965	-38.821		22.8805	-39.784		22.8879	-44.553		22.8879	-44.553		22.888	-41.473		22.8883	-34.041		22.9047	-36.007
22.9385	-36.592		22.9382	-38.825		22.9222	-39.787		22.9296	-44.553		22.9296	-44.553		22.9297	-41.473		22.93	-34.043		22.9464	-36.009
22.9801	-36.595		22.9798	-38.829		22.9639	-39.791		22.9712	-44.552		22.9712	-44.552		22.9714	-41.473		22.9716	-34.045		22.988	-36.011
23.0218	-36.597		23.0215	-38.834		23.0055	-39.794		23.0129	-44.552		23.0129	-44.552		23.013	-41.473		23.0133	-34.046		23.0297	-36.013
23.0635	-36.6		23.0632	-38.838		23.0472	-39.797		23.0546	-44.552		23.0546	-44.552		23.0547	-41.473		23.055	-34.048		23.0714	-36.015
23.1051	-36.603		23.1048	-38.843		23.0889	-39.801		23.0962	-44.551		23.0962	-44.551		23.0964	-41.473		23.0966	-34.05		23.113	-36.017
23.1468	-36.605		23.1465	-38.847		23.1305	-39.804		23.1379	-44.551		23.1379	-44.551		23.138	-41.473		23.1383	-34.052		23.1547	-36.019
23.1885	-36.608		23.1882	-38.851		23.1722	-39.808		23.1796	-44.551		23.1796	-44.551		23.1797	-41.474		23.18	-34.054		23.1964	-36.021
23.2301	-36.61		23.2298	-38.856		23.2139	-39.811		23.2212	-44.551		23.2212	-44.551		23.2214	-41.474		23.2216	-34.055		23.238	-36.023
23.2718	-36.613		23.2715	-38.86		23.2555	-39.815		23.2629	-44.55		23.2629	-44.55		23.263	-41.474		23.2633	-34.057		23.2797	-36.026
23.3135	-36.615		23.3132	-38.863		23.2972	-39.818		23.3046	-44.55		23.3046	-44.55		23.3047	-41.474		23.305	-34.059		23.3214	-36.028
23.3551	-36.618		23.3548	-38.867		23.3389	-39.823		23.3462	-44.549		23.3462	-44.549		23.3464	-41.474		23.3466	-34.061		23.363	-36.031
23.3968	-36.62		23.3965	-38.871		23.3805	-39.827		23.3879	-44.549		23.3879	-44.549		23.388	-41.474		23.3883	-34.062		23.4047	-36.033
23.4385	-36.623		23.4382	-38.875		23.4222	-39.831		23.4296	-44.548		23.4296	-44.548		23.4297	-41.474		23.43	-34.064		23.4464	-36.036
23.4801	-36.625		23.4798	-38.88		23.4639	-39.835		23.4712	-44.548		23.4712	-44.548		23.4714	-41.474		23.4716	-34.066		23.488	-36.038
23.5218	-36.628		23.5215	-38.884		23.5055	-39.839		23.5129	-44.547		23.5129	-44.547		23.513	-41.474		23.5133	-34.067		23.5297	-36.041
23.5635	-36.631		23.5632	-38.888		23.5472	-39.843		23.5546	-44.547		23.5546	-44.547		23.5547	-41.475		23.555	-34.069		23.5714	-36.044
23.6051	-36.633		23.6048	-38.893		23.5889	-39.847		23.5962	-44.546		23.5962	-44.546		23.5964	-41.475		23.5966	-34.07		23.613	-36.046
23.6468	-36.636		23.6465	-38.898		23.6305	-39.85		23.6379	-44.546		23.6379	-44.546		23.638	-41.475		23.6383	-34.071		23.6547	-36.049
23.6885	-36.638		23.6882	-38.903		23.6722	-39.854		23.6795	-44.546		23.6795	-44.546		23.6797	-41.475		23.68	-34.073		23.6964	-36.052
23.7301	-36.641		23.7298	-38.908		23.7139	-39.857		23.7212	-44.545		23.7212	-44.545		23.7214	-41.475		23.7216	-34.074		23.738	-36.054
23.7718	-36.644		23.7715	-38.913		23.7555	-39.86		23.7629	-44.545		23.7629	-44.545		23.763	-41.475		23.7633	-34.076		23.7797	-36.057
23.8135	-36.647		23.8132	-38.918		23.7972	-39.863		23.8045	-44.545		23.8045	-44.545		23.8047	-41.476		23.8049	-34.077		23.8214	-36.059
23.8551	-36.65		23.8548	-38.923		23.8389	-39.867		23.8462	-44.544		23.8462	-44.544		23.8464	-41.476		23.8466	-34.079		23.863	-36.062
23.8968	-36.653		23.8965	-38.928		23.8805	-39.871		23.8879	-44.544		23.8879	-44.544		23.888	-41.476		23.8883	-34.081		23.9047	-36.064
23.9385	-36.656		23.9382	-38.932		23.9222	-39.874		23.9295	-44.543		23.9295	-44.543		23.9297	-41.476		23.9299	-34.083		23.9464	-36.067
23.9801	-36.659		23.9798	-38.936		23.9639	-39.878		23.9712	-44.543		23.9712	-44.543		23.9714	-41.476		23.9716	-34.084		23.988	-36.07
24.0218	-36.662		24.0215	-38.941		24.0055	-39.882		24.0129	-44.542		24.0129	-44.542		24.013	-41.476		24.0133	-34.086		24.0297	-36.073
24.0635	-36.664		24.0632	-38.945		24.0472	-39.886		24.0545	-44.542		24.0545	-44.542		24.0547	-41.477		24.0549	-34.088		24.0714	-36.075
24.1051	-36.667		24.1048	-38.949		24.0889	-39.89		24.0962	-44.541		24.0962	-44.541		24.0964	-41.477		24.0966	-34.09		24.113	-36.078
24.1468	-36.669		24.1465	-38.953		24.1305	-39.894		24.1379	-44.541		24.1379	-44.541		24.138	-41.477		24.1383	-34.091		24.1547	-36.081
24.1885	-36.671		24.1882	-38.957		24.1722	-39.899		24.1795	-44.54		24.1795	-44.54		24.1797	-41.477		24.1799	-34.093		24.1964	-36.084
24.2301	-36.673		24.2298	-38.96		24.2139	-39.904		24.2212	-44.54		24.2212	-44.54		24.2214	-41.477		24.2216	-34.094		24.238	-36.086
24.2718	-36.674		24.2715	-38.964		24.2555	-39.908		24.2629	-44.54		24.2629	-44.54		24.263	-41.478		24.2633	-34.096		24.2797	-36.089
24.3135	-36.677		24.3132	-38.967		24.2972	-39.913		24.3045	-44.539		24.3045	-44.539		24.3047	-41.478		24.3049	-34.097		24.3214	-36.092
24.3551	-36.679		24.3548	-38.97		24.3389	-39.918		24.3462	-44.539		24.3462	-44.539		24.3464	-41.478		24.3466	-34.099		24.363	-36.094
24.3968	-36.681		24.3965	-38.974		24.3805	-39.922		24.3879	-44.538		24.3879	-44.538		24.388	-41.478		24.3883	-34.1		24.4047	-36.097
24.4385	-36.683		24.4382	-38.978		24.4222	-39.926		24.4295	-44.538		24.4295	-44.538		24.4297	-41.478		24.4299	-34.101		24.4464	-36.099
24.4801	-36.686		24.4798	-38.981		24.4639	-39.93		24.4712	-44.538		24.4712	-44.538		24.4714	-41.479		24.4716	-34.103		24.488	-36.101
24.5218	-36.688		24.5215	-38.985		24.5055	-39.934		24.5129	-44.537		24.5129	-44.537		24.513	-41.479		24.5133	-34.104		24.5297	-36.103
24.5634	-36.691		24.5632	-38.99		24.5472	-39.938		24.5545	-44.537		24.5545	-44.537		24.5547	-41.479		24.5549	-34.106		24.5713	-36.106
24.6051	-36.694		24.6048	-38.995		24.5889	-39.941		24.5962	-44.537		24.5962	-44.537		24.5964	-41.479		24.5966	-34.107		24.613	-36.108
24.6468	-36.697		24.6465	-39		24.6305	-39.945		24.6379	-44.536		24.6379	-44.536		24.638	-41.479		24.6383	-34.109		24.6547	-36.11
24.6885	-36.699		24.6882	-39.006		24.6722	-39.948		24.6795	-44.535		24.6795	-44.535		24.6797	-41.479		24.6799	-34.111		24.6964	-36.112
24.7301	-36.702		24.7298	-39.013		24.7139	-39.951		24.7212	-44.535		24.7212	-44.535		24.7214	-41.48		24.7216	-34.113		24.738	-36.115
24.7718	-36.704		24.7715	-39.018		24.7555	-39.955		24.7629	-44.534		24.7629	-44.534		24.763	-41.48		24.7633	-34.115		24.7797	-36.117
24.8135	-36.707		24.8132	-39.024		24.7972	-39.959		24.8045	-44.533		24.8045	-44.533		24.8047	-41.48		24.8049	-34.116		24.8213	-36.12
24.8551	-36.709		24.8548	-39.028		24.8389	-39.963		24.8462	-44.533		24.8462	-44.533		24.8464	-41.48		24.8466	-34.118		24.863	-36.123
24.8968	-36.711		24.8965	-39.033		24.8805	-39.967		24.8879	-44.532		24.8879	-44.532		24.888	-41.48		24.8883	-34.12		24.9047	-36.126
24.9385	-36.713		24.9382	-39.037		24.9222	-39.971		24.9295	-44.532		24.9295	-44.532		24.9297	-41.481		24.9299	-34.121		24.9463	-36.129
24.9801	-36.716		24.9798	-39.041		24.9639	-39.976		24.9712	-44.531		24.9712	-44.531		24.9714	-41.481		24.9716	-34.123		24.988	-36.131
25.0218	-36.718		25.0215	-39.045		25.0055	-39.98		25.0129	-44.531		25.0129	-44.531		25.013	-41.481		25.0133	-34.124		25.0297	-36.134
25.0635	-36.72		25.0631	-39.049		25.0472	-39.985		25.0545	-44.53		25.0545	-44.53		25.0547	-41.481		25.0549	-34.126		25.0713	-36.137
25.1051	-36.723		25.1048	-39.052		25.0889	-39.99		25.0962	-44.53		25.0962	-44.53		25.0964	-41.481		25.0966	-34.127		25.113	-36.14
25.1468	-36.726		25.1465	-39.056		25.1305	-39.995		25.1379	-44.529		25.1379	-44.529		25.138	-41.482		25.1383	-34.129		25.1547	-36.143
25.1885	-36.729		25.1881	-39.059		25.1722	-39.999		25.1795	-44.529		25.1795	-44.529		25.1797	-41.482		25.1799	-34.13		25.1963	-36.145
25.2301	-36.732		25.2298	-39.063		25.2139	-40.003		25.2212	-44.529		25.2212	-44.529		25.2214	-41.482		25.2216	-34.132		25.238	-36.148
25.2718	-36.735		25.2715	-39.068		25.2555	-40.007		25.2629	-44.528		25.2629	-44.528		25.263	-41.482		25.2633	-34.133		25.2797	-36.15
25.3135	-36.737		25.3131	-39.072		25.2972	-40.011		25.3045	-44.528		25.3045	-44.528		25.3047	-41.482		25.3049	-34.135		25.3213	-36.152
25.3551	-36.74		25.3548	-39.076		25.3389	-40.014		25.3462	-44.527		25.3462	-44.527		25.3464	-41.483		25.3466	-34.137		25.363	-36.155
25.3968	-36.743		25.3965	-39.081		25.3805	-40.018		25.3879	-44.526		25.3879	-44.526		25.388	-41.483		25.3883	-34.138		25.4047	-36.157
25.4384	-36.746		25.4381	-39.085		25.4222	-40.021		25.4295	-44.526		25.4295	-44.526		25.4297	-41.483		25.4299	-34.14		25.4463	-36.16
25.4801	-36.748		25.4798	-39.091		25.4639	-40.025		25.4712	-44.525		25.4712	-44.525		25.4714	-41.483		25.4716	-34.141		25.488	-36.163
25.5218	-36.751		25.5215	-39.096		25.5055	-40.029		25.5129	-44.525		25.5129	-44.525		25.513	-41.483		25.5133	-34.143		25.5297	-36.166
25.5634	-36.754		25.5631	-39.101		25.5472	-40.033		25.5545	-44.524		25.5545	-44.524		25.5547	-41.484		25.5549	-34.144		25.5713	-36.169
25.6051	-36.756		25.6048	-39.106		25.5889	-40.037		25.5962	-44.524		25.5962	-44.524		25.5964	-41.484		25.5966	-34.146		25.613	-36.172
25.6468	-36.758		25.6465	-39.111		25.6305	-40.041		25.6379	-44.523		25.6379	-44.523		25.638	-41.484		25.6383	-34.147		25.6547	-36.175
25.6885	-36.76		25.6881	-39.116		25.6722	-40.045		25.6795	-44.523		25.6795	-44.523		25.6797	-41.484		25.6799	-34.149		25.6963	-36.178
25.7301	-36.762		25.7298	-39.12		25.7139	-40.049		25.7212	-44.523		25.7212	-44.523		25.7214	-41.485		25.7216	-34.15		25.738	-36.181
25.7718	-36.765		25.7715	-39.124		25.7555	-40.054		25.7629	-44.522		25.7629	-44.522		25.763	-41.485		25.7633	-34.151		25.7797	-36.184
25.8134	-36.767		25.8132	-39.128		25.7972	-40.059		25.8045	-44.521		25.8045	-44.521		25.8047	-41.485		25.8049	-34.153		25.8213	-36.187
25.8551	-36.769		25.8548	-39.131		25.8389	-40.065		25.8462	-44.52		25.8462	-44.52		25.8464	-41.485		25.8466	-34.154		25.863	-36.19
25.8968	-36.772		25.8965	-39.135		25.8805	-40.07		25.8879	-44.519		25.8879	-44.519		25.888	-41.485		25.8883	-34.155		25.9047	-36.193
25.9384	-36.774		25.9382	-39.138		25.9222	-40.075		25.9295	-44.518		25.9295	-44.518		25.9297	-41.486		25.9299	-34.157		25.9463	-36.196
25.9801	-36.777		25.9798	-39.142		25.9639	-40.081		25.9712	-44.518		25.9712	-44.518		25.9714	-41.486		25.9716	-34.158		25.988	-36.198
26.0218	-36.779		26.0215	-39.146		26.0055	-40.085		26.0129	-44.517		26.0129	-44.517		26.013	-41.486		26.0133	-34.16		26.0297	-36.201
26.0634	-36.782		26.0631	-39.15		26.0472	-40.09		26.0545	-44.516		26.0545	-44.516		26.0547	-41.486		26.0549	-34.161		26.0713	-36.203
26.1051	-36.785		26.1048	-39.154		26.0889	-40.095		26.0962	-44.515		26.0962	-44.515		26.0964	-41.486		26.0966	-34.163		26.113	-36.206
26.1468	-36.788		26.1465	-39.158		26.1305	-40.1		26.1379	-44.515		26.1379	-44.515		26.138	-41.487		26.1383	-34.165		26.1547	-36.209
26.1884	-36.79		26.1881	-39.162		26.1722	-40.104		26.1795	-44.514		26.1795	-44.514		26.1797	-41.487		26.1799	-34.167		26.1963	-36.212
26.2301	-36.793		26.2298	-39.167		26.2139	-40.108		26.2212	-44.513		26.2212	-44.513		26.2214	-41.487		26.2216	-34.168		26.238	-36.215
26.2718	-36.796		26.2715	-39.171		26.2555	-40.111		26.2629	-44.512		26.2629	-44.512		26.263	-41.487		26.2633	-34.17		26.2797	-36.218
26.3134	-36.798		26.3131	-39.175		26.2972	-40.115		26.3045	-44.512		26.3045	-44.512		26.3047	-41.487		26.3049	-34.172		26.3213	-36.222
26.3551	-36.8		26.3548	-39.179		26.3389	-40.118		26.3462	-44.511		26.3462	-44.511		26.3464	-41.488		26.3466	-34.173		26.363	-36.225
26.3968	-36.802		26.3965	-39.183		26.3805	-40.122		26.3879	-44.511		26.3879	-44.511		26.388	-41.488		26.3883	-34.174		26.4047	-36.229
26.4384	-36.805		26.4381	-39.187		26.4222	-40.126		26.4295	-44.51		26.4295	-44.51		26.4297	-41.488		26.4299	-34.176		26.4463	-36.233
26.4801	-36.807		26.4798	-39.191		26.4638	-40.13		26.4712	-44.509		26.4712	-44.509		26.4714	-41.488		26.4716	-34.177		26.488	-36.236
26.5218	-36.81		26.5215	-39.195		26.5055	-40.135		26.5129	-44.509		26.5129	-44.509		26.513	-41.488		26.5133	-34.179		26.5297	-36.24
26.5634	-36.812		26.5631	-39.2		26.5472	-40.139		26.5545	-44.508		26.5545	-44.508		26.5547	-41.489		26.5549	-34.18		26.5713	-36.243
26.6051	-36.814		26.6048	-39.204		26.5889	-40.144		26.5962	-44.507		26.5962	-44.507		26.5964	-41.489		26.5966	-34.182		26.613	-36.247
26.6468	-36.817		26.6465	-39.208		26.6305	-40.148		26.6379	-44.506		26.6379	-44.506		26.638	-41.489		26.6383	-34.183		26.6547	-36.25
26.6884	-36.82		26.6881	-39.212		26.6722	-40.152		26.6795	-44.505		26.6795	-44.505		26.6797	-41.489		26.6799	-34.185		26.6963	-36.254
26.7301	-36.823		26.7298	-39.216		26.7139	-40.157		26.7212	-44.504		26.7212	-44.504		26.7214	-41.489		26.7216	-34.186		26.738	-36.257
26.7718	-36.827		26.7715	-39.221		26.7555	-40.161		26.7629	-44.503		26.7629	-44.503		26.763	-41.49		26.7633	-34.188		26.7797	-36.26
26.8134	-36.83		26.8131	-39.224		26.7972	-40.165		26.8045	-44.502		26.8045	-44.502		26.8047	-41.49		26.8049	-34.19		26.8213	-36.264
26.8551	-36.834		26.8548	-39.228		26.8389	-40.169		26.8462	-44.501		26.8462	-44.501		26.8464	-41.49		26.8466	-34.192		26.863	-36.267
26.8968	-36.837		26.8965	-39.232		26.8805	-40.173		26.8879	-44.5		26.8879	-44.5		26.888	-41.49		26.8883	-34.194		26.9047	-36.27
26.9384	-36.84		26.9381	-39.235		26.9222	-40.177		26.9295	-44.499		26.9295	-44.499		26.9297	-41.49		26.9299	-34.195		26.9463	-36.273
26.9801	-36.843		26.9798	-39.239		26.9639	-40.181		26.9712	-44.499		26.9712	-44.499		26.9714	-41.491		26.9716	-34.197		26.988	-36.277
27.0218	-36.845		27.0215	-39.244		27.0055	-40.184		27.0129	-44.498		27.0129	-44.498		27.013	-41.491		27.0133	-34.198		27.0297	-36.28
27.0634	-36.848		27.0631	-39.248		27.0472	-40.188		27.0545	-44.497		27.0545	-44.497		27.0547	-41.491		27.0549	-34.2		27.0713	-36.283
27.1051	-36.85		27.1048	-39.253		27.0889	-40.193		27.0962	-44.496		27.0962	-44.496		27.0963	-41.491		27.0966	-34.201		27.113	-36.286
27.1468	-36.851		27.1465	-39.258		27.1305	-40.197		27.1379	-44.495		27.1379	-44.495		27.138	-41.492		27.1383	-34.203		27.1547	-36.289
27.1884	-36.853		27.1881	-39.263		27.1722	-40.201		27.1795	-44.494		27.1795	-44.494		27.1797	-41.492		27.1799	-34.205		27.1963	-36.292
27.2301	-36.855		27.2298	-39.268		27.2138	-40.206		27.2212	-44.493		27.2212	-44.493		27.2213	-41.492		27.2216	-34.206		27.238	-36.295
27.2718	-36.857		27.2715	-39.272		27.2555	-40.21		27.2629	-44.492		27.2629	-44.492		27.263	-41.492		27.2633	-34.208		27.2797	-36.298
27.3134	-36.859		27.3131	-39.277		27.2972	-40.215		27.3045	-44.491		27.3045	-44.491		27.3047	-41.492		27.3049	-34.209		27.3213	-36.301
27.3551	-36.861		27.3548	-39.281		27.3388	-40.219		27.3462	-44.489		27.3462	-44.489		27.3463	-41.492		27.3466	-34.21		27.363	-36.304
27.3968	-36.863		27.3965	-39.285		27.3805	-40.224		27.3879	-44.488		27.3879	-44.488		27.388	-41.493		27.3883	-34.212		27.4047	-36.307
27.4384	-36.865		27.4381	-39.289		27.4222	-40.229		27.4295	-44.487		27.4295	-44.487		27.4297	-41.493		27.4299	-34.214		27.4463	-36.31
27.4801	-36.868		27.4798	-39.292		27.4638	-40.234		27.4712	-44.486		27.4712	-44.486		27.4713	-41.493		27.4716	-34.216		27.488	-36.312
27.5218	-36.87		27.5215	-39.296		27.5055	-40.239		27.5129	-44.485		27.5129	-44.485		27.513	-41.493		27.5133	-34.218		27.5297	-36.315
27.5634	-36.873		27.5631	-39.3		27.5472	-40.243		27.5545	-44.484		27.5545	-44.484		27.5547	-41.493		27.5549	-34.22		27.5713	-36.317
27.6051	-36.876		27.6048	-39.304		27.5888	-40.247		27.5962	-44.483		27.5962	-44.483		27.5963	-41.493		27.5966	-34.221		27.613	-36.32
27.6468	-36.878		27.6464	-39.308		27.6305	-40.25		27.6379	-44.482		27.6379	-44.482		27.638	-41.494		27.6383	-34.223		27.6547	-36.322
27.6884	-36.881		27.6881	-39.313		27.6722	-40.254		27.6795	-44.482		27.6795	-44.482		27.6797	-41.494		27.6799	-34.225		27.6963	-36.325
27.7301	-36.883		27.7298	-39.318		27.7138	-40.259		27.7212	-44.481		27.7212	-44.481		27.7213	-41.494		27.7216	-34.226		27.738	-36.327
27.7718	-36.885		27.7714	-39.324		27.7555	-40.262		27.7628	-44.48		27.7628	-44.48		27.763	-41.494		27.7633	-34.227		27.7797	-36.33
27.8134	-36.886		27.8131	-39.33		27.7972	-40.266		27.8045	-44.479		27.8045	-44.479		27.8047	-41.494		27.8049	-34.228		27.8213	-36.333
27.8551	-36.888		27.8548	-39.336		27.8388	-40.27		27.8462	-44.478		27.8462	-44.478		27.8463	-41.495		27.8466	-34.229		27.863	-36.336
27.8968	-36.89		27.8964	-39.342		27.8805	-40.274		27.8878	-44.477		27.8878	-44.477		27.888	-41.495		27.8883	-34.231		27.9047	-36.339
27.9384	-36.892		27.9381	-39.348		27.9222	-40.278		27.9295	-44.476		27.9295	-44.476		27.9297	-41.495		27.9299	-34.232		27.9463	-36.342
27.9801	-36.895		27.9798	-39.353		27.9638	-40.282		27.9712	-44.475		27.9712	-44.475		27.9713	-41.495		27.9716	-34.233		27.988	-36.346
28.0217	-36.897		28.0214	-39.358		28.0055	-40.286		28.0128	-44.474		28.0128	-44.474		28.013	-41.495		28.0132	-34.234		28.0297	-36.349
28.0634	-36.9		28.0631	-39.363		28.0472	-40.29		28.0545	-44.473		28.0545	-44.473		28.0547	-41.495		28.0549	-34.235		28.0713	-36.352
28.1051	-36.903		28.1048	-39.367		28.0888	-40.294		28.0962	-44.472		28.0962	-44.472		28.0963	-41.496		28.0966	-34.237		28.113	-36.355
28.1467	-36.906		28.1464	-39.372		28.1305	-40.299		28.1379	-44.471		28.1379	-44.471		28.138	-41.496		28.1382	-34.238		28.1547	-36.358
28.1884	-36.909		28.1881	-39.377		28.1788	-40.304		28.1795	-44.47		28.1795	-44.47		28.1797	-41.496		28.1799	-34.239		28.1963	-36.361
28.2301	-36.912		28.2298	-39.381		28.2205	-40.309		28.2212	-44.47		28.2212	-44.47		28.2213	-41.496		28.2216	-34.241		28.238	-36.364
28.2718	-36.915		28.2714	-39.385		28.2622	-40.314		28.2628	-44.469		28.2628	-44.469		28.263	-41.496		28.2632	-34.242		28.2797	-36.367
28.3134	-36.918		28.3131	-39.389		28.3038	-40.317		28.3045	-44.468		28.3045	-44.468		28.3047	-41.496		28.3049	-34.244		28.3213	-36.369
28.3551	-36.921		28.3548	-39.393		28.3455	-40.32		28.3462	-44.467		28.3462	-44.467		28.3463	-41.497		28.3466	-34.245		28.363	-36.372
28.3968	-36.924		28.3964	-39.398		28.3872	-40.323		28.3878	-44.466		28.3878	-44.466		28.388	-41.497		28.3882	-34.247		28.4047	-36.374
28.4384	-36.926		28.4381	-39.403		28.4288	-40.326		28.4295	-44.465		28.4295	-44.465		28.4297	-41.497		28.4299	-34.248		28.4463	-36.377
28.4801	-36.929		28.4798	-39.407		28.4705	-40.33		28.4712	-44.465		28.4712	-44.465		28.4713	-41.497		28.4716	-34.249		28.488	-36.38
28.5218	-36.931		28.5214	-39.411		28.5121	-40.334		28.5128	-44.463		28.5128	-44.463		28.513	-41.497		28.5132	-34.251		28.5297	-36.383
28.5634	-36.934		28.5631	-39.415		28.5538	-40.338		28.5545	-44.462		28.5545	-44.462		28.5547	-41.498		28.5549	-34.252		28.5713	-36.386
28.6051	-36.936		28.6048	-39.418		28.5955	-40.341		28.5962	-44.461		28.5962	-44.461		28.5963	-41.498		28.5966	-34.253		28.613	-36.389
28.6467	-36.938		28.6464	-39.422		28.6371	-40.344		28.6378	-44.46		28.6378	-44.46		28.638	-41.498		28.6382	-34.255		28.6547	-36.392
28.6884	-36.94		28.6881	-39.426		28.6788	-40.347		28.6795	-44.459		28.6795	-44.459		28.6796	-41.498		28.6799	-34.256		28.6963	-36.396
28.7301	-36.942		28.7298	-39.43		28.7205	-40.35		28.7212	-44.458		28.7212	-44.458		28.7213	-41.498		28.7216	-34.257		28.738	-36.399
28.7718	-36.944		28.7715	-39.434		28.7621	-40.354		28.7628	-44.457		28.7628	-44.457		28.763	-41.498		28.7632	-34.259		28.7797	-36.402
28.8134	-36.947		28.8131	-39.438		28.8038	-40.358		28.8045	-44.456		28.8045	-44.456		28.8046	-41.499		28.8049	-34.26		28.8213	-36.405
28.8551	-36.949		28.8548	-39.442		28.8455	-40.363		28.8462	-44.455		28.8462	-44.455		28.8463	-41.499		28.8466	-34.262		28.863	-36.409
28.8968	-36.952		28.8964	-39.445		28.8871	-40.368		28.8878	-44.454		28.8878	-44.454		28.888	-41.499		28.8882	-34.263		28.9047	-36.412
28.9384	-36.954		28.9381	-39.448		28.9288	-40.373		28.9295	-44.454		28.9295	-44.454		28.9296	-41.499		28.9299	-34.264		28.9463	-36.414
28.9801	-36.957		28.9798	-39.451		28.9705	-40.378		28.9712	-44.453		28.9712	-44.453		28.9713	-41.499		28.9716	-34.266		28.988	-36.417
29.0217	-36.959		29.0214	-39.454		29.0121	-40.383		29.0128	-44.452		29.0128	-44.452		29.013	-41.499		29.0132	-34.267		29.0297	-36.42
29.0634	-36.962		29.0631	-39.458		29.0538	-40.389		29.0545	-44.451		29.0545	-44.451		29.0546	-41.5		29.0549	-34.269		29.0713	-36.423
29.1051	-36.965		29.1048	-39.461		29.0955	-40.394		29.0962	-44.45		29.0962	-44.45		29.0963	-41.5		29.0966	-34.27		29.113	-36.426
29.1467	-36.968		29.1464	-39.464		29.1371	-40.398		29.1378	-44.449		29.1378	-44.449		29.138	-41.5		29.1382	-34.271		29.1546	-36.429
29.1884	-36.97		29.1881	-39.467		29.1788	-40.403		29.1795	-44.448		29.1795	-44.448		29.1796	-41.5		29.1799	-34.272		29.1963	-36.432
29.2301	-36.972		29.2298	-39.471		29.2205	-40.407		29.2212	-44.447		29.2212	-44.447		29.2213	-41.5		29.2216	-34.274		29.238	-36.435
29.2717	-36.974		29.2714	-39.474		29.2621	-40.41		29.2628	-44.446		29.2628	-44.446		29.263	-41.5		29.2632	-34.275		29.2796	-36.438
29.3134	-36.977		29.3131	-39.478		29.3038	-40.413		29.3045	-44.445		29.3045	-44.445		29.3046	-41.501		29.3049	-34.276		29.3213	-36.442
29.3551	-36.979		29.3548	-39.482		29.3455	-40.416		29.3462	-44.444		29.3462	-44.444		29.3463	-41.501		29.3466	-34.277		29.363	-36.445
29.3967	-36.981		29.3964	-39.486		29.3871	-40.419		29.3878	-44.443		29.3878	-44.443		29.388	-41.501		29.3882	-34.279		29.4046	-36.448
29.4384	-36.983		29.4381	-39.49		29.4288	-40.423		29.4295	-44.443		29.4295	-44.443		29.4296	-41.501		29.4299	-34.28		29.4463	-36.451
29.4801	-36.985		29.4798	-39.495		29.4705	-40.426		29.4712	-44.442		29.4712	-44.442		29.4713	-41.501		29.4716	-34.282		29.488	-36.454
29.5217	-36.988		29.5214	-39.5		29.5121	-40.429		29.5128	-44.441		29.5128	-44.441		29.513	-41.501		29.5132	-34.284		29.5296	-36.457
29.5634	-36.99		29.5631	-39.504		29.5538	-40.432		29.5545	-44.44		29.5545	-44.44		29.5546	-41.501		29.5549	-34.286		29.5713	-36.46
29.6051	-36.993		29.6047	-39.508		29.5955	-40.436		29.5962	-44.439		29.5962	-44.439		29.5963	-41.502		29.5966	-34.288		29.613	-36.463
29.6467	-36.996		29.6464	-39.512		29.6371	-40.44		29.6378	-44.438		29.6378	-44.438		29.638	-41.502		29.6382	-34.29		29.6546	-36.466
29.6884	-36.998		29.6881	-39.516		29.6788	-40.444		29.6795	-44.437		29.6795	-44.437		29.6796	-41.502		29.6799	-34.292		29.6963	-36.469
29.7301	-37.001		29.7297	-39.519		29.7205	-40.448		29.7212	-44.436		29.7212	-44.436		29.7213	-41.502		29.7216	-34.294		29.738	-36.471
29.7717	-37.003		29.7714	-39.523		29.7621	-40.452		29.7628	-44.435		29.7628	-44.435		29.763	-41.502		29.7632	-34.295		29.7796	-36.474
29.8134	-37.006		29.8131	-39.527		29.8038	-40.456		29.8045	-44.434		29.8045	-44.434		29.8046	-41.502		29.8049	-34.297		29.8213	-36.477
29.8551	-37.008		29.8547	-39.531		29.8455	-40.46		29.8462	-44.432		29.8462	-44.432		29.8463	-41.503		29.8466	-34.299		29.863	-36.479
29.8967	-37.011		29.8964	-39.535		29.8871	-40.464		29.8878	-44.431		29.8878	-44.431		29.888	-41.503		29.8882	-34.3		29.9046	-36.482
29.9384	-37.013		29.9381	-39.539		29.9288	-40.468		29.9295	-44.43		29.9295	-44.43		29.9296	-41.503		29.9299	-34.301		29.9463	-36.485
29.98	-37.015		29.9797	-39.544		29.9705	-40.471		29.9711	-44.428		29.9711	-44.428		29.9713	-41.503		29.9716	-34.303		29.988	-36.488
30.0217	-37.018		30.0214	-39.549		30.0121	-40.475		30.0128	-44.427		30.0128	-44.427		30.013	-41.503		30.0132	-34.304		30.0296	-36.491
30.0634	-37.02		30.0631	-39.554		30.0538	-40.478		30.0545	-44.426		30.0545	-44.426		30.0546	-41.503		30.0549	-34.305		30.0713	-36.495
30.105	-37.023		30.1047	-39.558		30.0954	-40.48		30.0961	-44.425		30.0961	-44.425		30.0963	-41.503		30.0966	-34.307		30.113	-36.498
30.1467	-37.025		30.1464	-39.563		30.1371	-40.482		30.1378	-44.424		30.1378	-44.424		30.138	-41.503		30.1382	-34.308		30.1546	-36.502
30.1884	-37.027		30.1881	-39.568		30.1788	-40.484		30.1795	-44.423		30.1795	-44.423		30.1796	-41.503		30.1799	-34.31		30.1963	-36.505
30.23	-37.029		30.2297	-39.572		30.2204	-40.487		30.2212	-44.421		30.2212	-44.421		30.2213	-41.504		30.2216	-34.311		30.238	-36.508
30.2717	-37.032		30.2714	-39.576		30.2621	-40.489		30.2628	-44.42		30.2628	-44.42		30.263	-41.504		30.2632	-34.313		30.2796	-36.512
30.3134	-37.034		30.3131	-39.579		30.3038	-40.492		30.3045	-44.419		30.3045	-44.419		30.3046	-41.504		30.3049	-34.315		30.3213	-36.515
30.355	-37.037		30.3547	-39.583		30.3454	-40.495		30.3462	-44.418		30.3462	-44.418		30.3463	-41.504		30.3466	-34.316		30.363	-36.518
30.3967	-37.039		30.3964	-39.586		30.3871	-40.499		30.3878	-44.416		30.3878	-44.416		30.388	-41.504		30.3882	-34.317		30.4046	-36.521
30.4384	-37.042		30.4381	-39.589		30.4288	-40.503		30.4295	-44.415		30.4295	-44.415		30.4296	-41.504		30.4299	-34.319		30.4463	-36.523
30.48	-37.044		30.4797	-39.592		30.4704	-40.506		30.4712	-44.413		30.4712	-44.413		30.4713	-41.504		30.4716	-34.32		30.488	-36.526
30.5217	-37.047		30.5214	-39.595		30.5121	-40.51		30.5128	-44.412		30.5128	-44.412		30.5129	-41.504		30.5132	-34.321		30.5296	-36.528
30.5634	-37.049		30.5631	-39.598		30.5538	-40.513		30.5545	-44.411		30.5545	-44.411		30.5546	-41.504		30.5549	-34.322		30.5713	-36.531
30.605	-37.051		30.6047	-39.601		30.5954	-40.517		30.5961	-44.41		30.5961	-44.41		30.5963	-41.505		30.5966	-34.324		30.613	-36.534
30.6467	-37.053		30.6464	-39.604		30.6371	-40.521		30.6378	-44.409		30.6378	-44.409		30.6379	-41.505		30.6382	-34.325		30.6546	-36.536
30.6884	-37.055		30.6881	-39.607		30.6788	-40.525		30.6795	-44.407		30.6795	-44.407		30.6796	-41.505		30.6799	-34.326		30.6963	-36.54
30.73	-37.057		30.7297	-39.609		30.7204	-40.529		30.7211	-44.406		30.7211	-44.406		30.7213	-41.505		30.7216	-34.327		30.738	-36.542
30.7717	-37.059		30.7714	-39.612		30.7621	-40.532		30.7628	-44.405		30.7628	-44.405		30.7629	-41.505		30.7632	-34.328		30.7796	-36.546
30.8134	-37.061		30.8131	-39.615		30.8038	-40.535		30.8045	-44.403		30.8045	-44.403		30.8046	-41.505		30.8049	-34.329		30.8213	-36.549
30.855	-37.063		30.8547	-39.618		30.8454	-40.537		30.8461	-44.402		30.8461	-44.402		30.8463	-41.505		30.8466	-34.331		30.863	-36.552
30.8967	-37.065		30.8964	-39.621		30.8871	-40.539		30.8878	-44.401		30.8878	-44.401		30.8879	-41.505		30.8882	-34.332		30.9046	-36.556
30.9384	-37.067		30.9381	-39.625		30.9288	-40.541		30.9295	-44.399		30.9295	-44.399		30.9296	-41.505		30.9299	-34.334		30.9463	-36.559
30.98	-37.069		30.9797	-39.629		30.9704	-40.544		30.9711	-44.397		30.9711	-44.397		30.9713	-41.505		30.9715	-34.335		30.988	-36.562
31.0217	-37.071		31.0214	-39.632		31.0121	-40.548		31.0128	-44.395		31.0128	-44.395		31.0129	-41.505		31.0132	-34.337		31.0296	-36.565
31.0634	-37.074		31.0631	-39.635		31.0538	-40.551		31.0545	-44.394		31.0545	-44.394		31.0546	-41.505		31.0549	-34.338		31.0713	-36.568
31.105	-37.076		31.1047	-39.638		31.0954	-40.555		31.0961	-44.392		31.0961	-44.392		31.0963	-41.505		31.0965	-34.34		31.113	-36.571
31.1467	-37.078		31.1464	-39.641		31.1371	-40.559		31.1378	-44.39		31.1378	-44.39		31.1379	-41.505		31.1382	-34.341		31.1546	-36.573
31.1884	-37.08		31.1881	-39.644		31.1788	-40.563		31.1795	-44.388		31.1795	-44.388		31.1796	-41.505		31.1865	-34.342		31.1963	-36.576
31.23	-37.083		31.2297	-39.646		31.2204	-40.567		31.2211	-44.387		31.2211	-44.387		31.2213	-41.505		31.2282	-34.344		31.2379	-36.578
31.2717	-37.085		31.2714	-39.649		31.2621	-40.572		31.2628	-44.385		31.2628	-44.385		31.2629	-41.505		31.2699	-34.344		31.2796	-36.58
31.3134	-37.087		31.3131	-39.652		31.3038	-40.576		31.3045	-44.384		31.3045	-44.384		31.3046	-41.505		31.3115	-34.346		31.3213	-36.583
31.355	-37.089		31.3547	-39.655		31.3454	-40.581		31.3461	-44.382		31.3461	-44.382		31.3463	-41.505		31.3532	-34.347		31.3629	-36.586
31.3967	-37.091		31.3964	-39.658		31.3871	-40.586		31.3878	-44.381		31.3878	-44.381		31.3879	-41.505		31.3949	-34.348		31.4046	-36.588
31.4384	-37.093		31.4381	-39.661		31.4288	-40.59		31.4295	-44.38		31.4295	-44.38		31.4296	-41.505		31.4365	-34.349		31.4463	-36.591
31.48	-37.095		31.4797	-39.665		31.4704	-40.595		31.4711	-44.378		31.4711	-44.378		31.4713	-41.505		31.4782	-34.35		31.4879	-36.594
31.5217	-37.096		31.5214	-39.668		31.5121	-40.6		31.5128	-44.376		31.5128	-44.376		31.5129	-41.505		31.5199	-34.351		31.5296	-36.597
31.5634	-37.099		31.5631	-39.673		31.5538	-40.605		31.5545	-44.374		31.5545	-44.374		31.5546	-41.505		31.5615	-34.353		31.5713	-36.6
31.605	-37.101		31.6047	-39.679		31.5954	-40.61		31.5961	-44.372		31.5961	-44.372		31.5963	-41.505		31.6032	-34.354		31.6129	-36.603
31.6467	-37.103		31.6464	-39.683		31.6371	-40.614		31.6378	-44.37		31.6378	-44.37		31.6379	-41.505		31.6449	-34.355		31.6546	-36.606
31.6884	-37.106		31.6881	-39.688		31.6788	-40.618		31.6795	-44.369		31.6795	-44.369		31.6796	-41.505		31.6865	-34.357		31.6963	-36.609
31.73	-37.108		31.7297	-39.692		31.7204	-40.622		31.7211	-44.367		31.7211	-44.367		31.7213	-41.505		31.7282	-34.358		31.7379	-36.612
31.7717	-37.11		31.7714	-39.695		31.7621	-40.626		31.7628	-44.365		31.7628	-44.365		31.7629	-41.505		31.7699	-34.359		31.7796	-36.614
31.8133	-37.113		31.8131	-39.7		31.8038	-40.63		31.8044	-44.363		31.8044	-44.363		31.8046	-41.505		31.8115	-34.36		31.8213	-36.616
31.855	-37.116		31.8547	-39.704		31.8454	-40.633		31.8461	-44.361		31.8461	-44.361		31.8463	-41.505		31.8532	-34.361		31.8629	-36.619
31.8967	-37.118		31.8964	-39.708		31.8871	-40.636		31.8878	-44.36		31.8878	-44.36		31.8879	-41.505		31.8949	-34.362		31.9046	-36.621
31.9383	-37.12		31.9381	-39.711		31.9288	-40.639		31.9294	-44.358		31.9294	-44.358		31.9296	-41.505		31.9365	-34.363		31.9463	-36.622
31.98	-37.123		31.9797	-39.714		31.9704	-40.643		31.9711	-44.356		31.9711	-44.356		31.9713	-41.505		31.9782	-34.364		31.9879	-36.624
32.0217	-37.125		32.0214	-39.718		32.0121	-40.647		32.0128	-44.354		32.0128	-44.354		32.0129	-41.505		32.0198	-34.365		32.0296	-36.626
32.0633	-37.128		32.063	-39.721		32.0538	-40.652		32.0545	-44.352		32.0545	-44.352		32.0546	-41.505		32.0615	-34.366		32.0713	-36.628
32.105	-37.129		32.1047	-39.723		32.0954	-40.656		32.0961	-44.35		32.0961	-44.35		32.0962	-41.505		32.1032	-34.367		32.1129	-36.63
32.1467	-37.131		32.1464	-39.726		32.1371	-40.66		32.1378	-44.348		32.1378	-44.348		32.1379	-41.505		32.1448	-34.368		32.1546	-36.633
32.1883	-37.133		32.188	-39.729		32.1788	-40.663		32.1794	-44.346		32.1794	-44.346		32.1796	-41.505		32.1865	-34.37		32.1963	-36.635
32.23	-37.136		32.2364	-39.733		32.2204	-40.667		32.2211	-44.343		32.2211	-44.343		32.2212	-41.505		32.2282	-34.371		32.2379	-36.638
32.2717	-37.138		32.2781	-39.736		32.2621	-40.67		32.2628	-44.341		32.2628	-44.341		32.2629	-41.505		32.2698	-34.372		32.2796	-36.64
32.3133	-37.14		32.3197	-39.739		32.3038	-40.674		32.3044	-44.339		32.3044	-44.339		32.3046	-41.505		32.3115	-34.373		32.3296	-36.644
32.355	-37.142		32.3614	-39.743		32.3454	-40.676		32.3544	-44.336		32.3544	-44.336		32.3546	-41.505		32.3532	-34.374		32.3713	-36.646
32.3967	-37.144		32.4031	-39.746		32.3871	-40.679		32.3961	-44.334		32.3961	-44.334		32.3962	-41.505		32.3948	-34.375		32.4129	-36.649
32.4383	-37.146		32.4447	-39.75		32.4288	-40.68		32.4378	-44.332		32.4378	-44.332		32.4379	-41.505		32.4365	-34.376		32.4546	-36.651
32.48	-37.149		32.4864	-39.753		32.4704	-40.681		32.4794	-44.331		32.4794	-44.331		32.4796	-41.505		32.4782	-34.377		32.4963	-36.654
32.5217	-37.151		32.528	-39.757		32.5121	-40.683		32.5211	-44.329		32.5211	-44.329		32.5213	-41.505		32.5198	-34.378		32.5379	-36.656
32.5633	-37.153		32.5697	-39.76		32.5538	-40.686		32.5628	-44.328		32.5628	-44.328		32.5629	-41.505		32.5615	-34.379		32.5796	-36.658
32.605	-37.155		32.6114	-39.764		32.5954	-40.69		32.6044	-44.326		32.6044	-44.326		32.6046	-41.505		32.6032	-34.379		32.6212	-36.661
32.6467	-37.157		32.653	-39.768		32.6371	-40.694		32.6461	-44.324		32.6461	-44.324		32.6462	-41.505		32.6448	-34.38		32.6629	-36.663
32.6883	-37.159		32.6947	-39.771		32.6787	-40.698		32.6878	-44.322		32.6878	-44.322		32.6879	-41.505		32.6865	-34.381		32.7046	-36.665
32.73	-37.161		32.7364	-39.774		32.7204	-40.703		32.7294	-44.32		32.7294	-44.32		32.7296	-41.505		32.7282	-34.382		32.7462	-36.668
32.7717	-37.162		32.778	-39.777		32.7621	-40.705		32.7711	-44.318		32.7711	-44.318		32.7712	-41.505		32.7698	-34.383		32.7879	-36.67
32.8133	-37.164		32.8197	-39.78		32.8037	-40.707		32.8128	-44.316		32.8128	-44.316		32.8129	-41.504		32.8115	-34.383		32.8296	-36.672
32.855	-37.165		32.8614	-39.783		32.8454	-40.711		32.8544	-44.314		32.8544	-44.314		32.8546	-41.504		32.8532	-34.384		32.8713	-36.674
32.9034	-37.166		32.903	-39.786		32.8871	-40.716		32.8961	-44.312		32.8961	-44.312		32.8962	-41.504		32.8948	-34.385		32.9129	-36.676
32.945	-37.168		32.9447	-39.789		32.9287	-40.721		32.9378	-44.31		32.9378	-44.31		32.9379	-41.504		32.9365	-34.386		32.9546	-36.679
32.9867	-37.169		32.9864	-39.792		32.9704	-40.726		32.9794	-44.308		32.9794	-44.308		32.9796	-41.504		32.9782	-34.387		32.9963	-36.681
33.0283	-37.17		33.028	-39.796		33.0121	-40.73		33.0211	-44.306		33.0211	-44.306		33.0212	-41.504		33.0198	-34.388		33.0379	-36.683
33.07	-37.171		33.0697	-39.799		33.0538	-40.734		33.0628	-44.304		33.0628	-44.304		33.0696	-41.504		33.0615	-34.388		33.0796	-36.685
33.1117	-37.173		33.1114	-39.803		33.0954	-40.739		33.1044	-44.303		33.1044	-44.303		33.1112	-41.504		33.1032	-34.389		33.1279	-36.688
33.1533	-37.175		33.1531	-39.807		33.1371	-40.743		33.1461	-44.301		33.1461	-44.301		33.1529	-41.504		33.1448	-34.39		33.1696	-36.69
33.195	-37.176		33.1947	-39.811		33.1787	-40.748		33.1878	-44.299		33.1878	-44.299		33.1946	-41.504		33.1865	-34.39		33.2112	-36.692
33.2367	-37.178		33.2364	-39.816		33.2204	-40.752		33.2294	-44.297		33.2294	-44.297		33.2362	-41.504		33.2282	-34.391		33.2529	-36.694
33.2783	-37.18		33.2781	-39.819		33.2621	-40.756		33.2711	-44.295		33.2711	-44.295		33.2779	-41.504		33.2698	-34.391		33.2946	-36.696
33.32	-37.182		33.3197	-39.824		33.3037	-40.759		33.3128	-44.293		33.3128	-44.293		33.3196	-41.503		33.3115	-34.392		33.3362	-36.698
33.3617	-37.184		33.3614	-39.83		33.3454	-40.762		33.3544	-44.291		33.3544	-44.291		33.3612	-41.503		33.3532	-34.392		33.3779	-36.7
33.4033	-37.185		33.403	-39.836		33.3871	-40.764		33.3961	-44.289		33.3961	-44.289		33.4029	-41.503		33.3948	-34.393		33.4196	-36.702
33.445	-37.187		33.4447	-39.841		33.4287	-40.766		33.4378	-44.287		33.4378	-44.287		33.4446	-41.503		33.4365	-34.393		33.4612	-36.704
33.4867	-37.188		33.4864	-39.844		33.4704	-40.769		33.4794	-44.284		33.4794	-44.284		33.4862	-41.503		33.4782	-34.394		33.5029	-36.706
33.5283	-37.19		33.528	-39.847		33.5121	-40.772		33.5211	-44.282		33.5211	-44.282		33.5279	-41.503		33.5198	-34.395		33.5446	-36.708
33.57	-37.191		33.5697	-39.849		33.5537	-40.775		33.5628	-44.28		33.5628	-44.28		33.5696	-41.503		33.5615	-34.395		33.5862	-36.711
33.6117	-37.193		33.6114	-39.851		33.5954	-40.776		33.6044	-44.278		33.6044	-44.278		33.6112	-41.503		33.6032	-34.396		33.6279	-36.714
33.6533	-37.195		33.653	-39.854		33.6371	-40.777		33.6461	-44.276		33.6461	-44.276		33.6529	-41.503		33.6448	-34.397		33.6696	-36.717
33.695	-37.197		33.6947	-39.856		33.6787	-40.778		33.6878	-44.275		33.6878	-44.275		33.6946	-41.502		33.6865	-34.397		33.7112	-36.72
33.7366	-37.199		33.7364	-39.859		33.7204	-40.782		33.7294	-44.273		33.7294	-44.273		33.7362	-41.502		33.7282	-34.398		33.7529	-36.723
33.7783	-37.201		33.778	-39.862		33.7621	-40.786		33.7711	-44.271		33.7711	-44.271		33.7779	-41.502		33.7698	-34.398		33.7946	-36.726
33.82	-37.204		33.8197	-39.864		33.8037	-40.792		33.8128	-44.27		33.8128	-44.27		33.8195	-41.502		33.8115	-34.399		33.8362	-36.728
33.8617	-37.206		33.8614	-39.867		33.8454	-40.797		33.8544	-44.268		33.8544	-44.268		33.8612	-41.502		33.8532	-34.4		33.8779	-36.731
33.9033	-37.208		33.903	-39.87		33.8871	-40.802		33.8961	-44.266		33.8961	-44.266		33.9029	-41.502		33.8948	-34.4		33.9196	-36.734
33.945	-37.21		33.9447	-39.873		33.9287	-40.806		33.9377	-44.264		33.9377	-44.264		33.9445	-41.501		33.9365	-34.401		33.9612	-36.736
33.9867	-37.212		33.9864	-39.876		33.9704	-40.81		33.9794	-44.262		33.9794	-44.262		33.9862	-41.501		33.9782	-34.401		34.0029	-36.738
34.0283	-37.214		34.028	-39.878		34.0121	-40.814		34.0211	-44.26		34.0211	-44.26		34.0279	-41.501		34.0198	-34.402		34.0446	-36.741
34.07	-37.216		34.0697	-39.881		34.0537	-40.818		34.0628	-44.258		34.0628	-44.258		34.0695	-41.501		34.0615	-34.403		34.0862	-36.743
34.1116	-37.217		34.1114	-39.884		34.0954	-40.822		34.1044	-44.256		34.1044	-44.256		34.1112	-41.501		34.1032	-34.403		34.1279	-36.745
34.1533	-37.219		34.153	-39.887		34.1371	-40.827		34.1461	-44.254		34.1461	-44.254		34.1529	-41.501		34.1448	-34.404		34.1696	-36.747
34.195	-37.22		34.1947	-39.89		34.1787	-40.832		34.1944	-44.252		34.1944	-44.252		34.1945	-41.5		34.1865	-34.405		34.2112	-36.749
34.2367	-37.222		34.2364	-39.893		34.2204	-40.838		34.2361	-44.25		34.2361	-44.25		34.2362	-41.5		34.2282	-34.405		34.2529	-36.751
34.2783	-37.223		34.278	-39.895		34.2621	-40.842		34.2777	-44.248		34.2777	-44.248		34.2779	-41.5		34.2698	-34.406		34.2946	-36.753
34.32	-37.224		34.3197	-39.898		34.3037	-40.847		34.3194	-44.246		34.3194	-44.246		34.3195	-41.5		34.3115	-34.407		34.3362	-36.755
34.3616	-37.226		34.3614	-39.901		34.3454	-40.852		34.3611	-44.244		34.3611	-44.244		34.3612	-41.5		34.3532	-34.407		34.3779	-36.757
34.4033	-37.228		34.403	-39.905		34.3871	-40.857		34.4027	-44.242		34.4027	-44.242		34.4029	-41.5		34.3948	-34.408		34.4196	-36.759
34.445	-37.23		34.4447	-39.909		34.4287	-40.862		34.4444	-44.24		34.4444	-44.24		34.4445	-41.499		34.4365	-34.408		34.4612	-36.762
34.4866	-37.232		34.4864	-39.914		34.4704	-40.867		34.4861	-44.238		34.4861	-44.238		34.4862	-41.499		34.4782	-34.409		34.5029	-36.764
34.5283	-37.234		34.528	-39.917		34.5121	-40.871		34.5277	-44.236		34.5277	-44.236		34.5279	-41.499		34.5198	-34.409		34.5446	-36.766
34.57	-37.236		34.5697	-39.921		34.5537	-40.875		34.5694	-44.233		34.5694	-44.233		34.5695	-41.499		34.5615	-34.409		34.5862	-36.768
34.6116	-37.239		34.6114	-39.925		34.5954	-40.878		34.6111	-44.231		34.6111	-44.231		34.6112	-41.499		34.6032	-34.41		34.6279	-36.77
34.6533	-37.241		34.653	-39.929		34.6371	-40.882		34.6527	-44.229		34.6527	-44.229		34.6529	-41.498		34.6448	-34.41		34.6696	-36.772
34.695	-37.243		34.6947	-39.933		34.6787	-40.887		34.6944	-44.227		34.6944	-44.227		34.6945	-41.498		34.6865	-34.41		34.7112	-36.774
34.7366	-37.244		34.7364	-39.936		34.7204	-40.891		34.7361	-44.224		34.7361	-44.224		34.7362	-41.498		34.7282	-34.411		34.7529	-36.776
34.7783	-37.246		34.778	-39.939		34.7621	-40.896		34.7777	-44.223		34.7777	-44.223		34.7779	-41.498		34.7698	-34.411		34.7946	-36.778
34.82	-37.247		34.8197	-39.942		34.8037	-40.9		34.8194	-44.221		34.8194	-44.221		34.8195	-41.498		34.8115	-34.411		34.8362	-36.78
34.8616	-37.248		34.8614	-39.945		34.8454	-40.905		34.8611	-44.219		34.8611	-44.219		34.8612	-41.497		34.8532	-34.412		34.8779	-36.781
34.9033	-37.25		34.903	-39.948		34.8871	-40.91		34.9027	-44.217		34.9027	-44.217		34.9029	-41.497		34.8948	-34.412		34.9196	-36.784
34.945	-37.251		34.9447	-39.951		34.9287	-40.915		34.9444	-44.216		34.9444	-44.216		34.9445	-41.497		34.9365	-34.412		34.9612	-36.786
34.9866	-37.253		34.9864	-39.955		34.9704	-40.92		34.9861	-44.214		34.9861	-44.214		34.9862	-41.497		34.9782	-34.413		35.0029	-36.788
35.0283	-37.254		35.028	-39.958		35.0121	-40.926		35.0277	-44.212		35.0277	-44.212		35.0279	-41.497		35.0198	-34.413		35.0446	-36.79
35.07	-37.256		35.0697	-39.961		35.0537	-40.931		35.0694	-44.21		35.0694	-44.21		35.0695	-41.496		35.0615	-34.413		35.0862	-36.793
35.1116	-37.257		35.1114	-39.963		35.0954	-40.937		35.1111	-44.208		35.1111	-44.208		35.1112	-41.496		35.1032	-34.414		35.1279	-36.795
35.1533	-37.259		35.153	-39.966		35.1371	-40.942		35.1527	-44.205		35.1527	-44.205		35.1529	-41.496		35.1448	-34.414		35.1696	-36.797
35.195	-37.261		35.1947	-39.969		35.1787	-40.945		35.1944	-44.203		35.1944	-44.203		35.1945	-41.496		35.1865	-34.414		35.2112	-36.8
35.2366	-37.263		35.2364	-39.971		35.2204	-40.949		35.2361	-44.201		35.2361	-44.201		35.2362	-41.495		35.2282	-34.414		35.2529	-36.802
35.2783	-37.265		35.278	-39.974		35.2621	-40.953		35.2777	-44.199		35.2777	-44.199		35.2779	-41.495		35.2698	-34.415		35.2946	-36.804
35.32	-37.266		35.3197	-39.978		35.3037	-40.956		35.3194	-44.197		35.3194	-44.197		35.3195	-41.495		35.3115	-34.415		35.3362	-36.806
35.3616	-37.268		35.3614	-39.981		35.3454	-40.96		35.3611	-44.196		35.3611	-44.196		35.3612	-41.495		35.3532	-34.415		35.3779	-36.808
35.4033	-37.269		35.403	-39.984		35.3871	-40.963		35.4027	-44.194		35.4027	-44.194		35.4029	-41.494		35.3948	-34.415		35.4196	-36.81
35.445	-37.271		35.4447	-39.987		35.4287	-40.965		35.4444	-44.192		35.4444	-44.192		35.4445	-41.494		35.4365	-34.416		35.4612	-36.812
35.4866	-37.272		35.4864	-39.991		35.4704	-40.967		35.4861	-44.19		35.4861	-44.19		35.4862	-41.494		35.4782	-34.416		35.5029	-36.814
35.5283	-37.274		35.528	-39.994		35.5121	-40.97		35.5277	-44.189		35.5277	-44.189		35.5279	-41.494		35.5198	-34.416		35.5446	-36.816
35.57	-37.275		35.5697	-39.997		35.5537	-40.974		35.5694	-44.187		35.5694	-44.187		35.5695	-41.493		35.5615	-34.417		35.5862	-36.818
35.6116	-37.276		35.6114	-40.001		35.5954	-40.977		35.6111	-44.185		35.6111	-44.185		35.6112	-41.493		35.6031	-34.417		35.6279	-36.82
35.6533	-37.277		35.653	-40.004		35.6371	-40.98		35.6527	-44.183		35.6527	-44.183		35.6529	-41.493		35.6448	-34.417		35.6696	-36.822
35.695	-37.279		35.6947	-40.007		35.6787	-40.984		35.6944	-44.181		35.6944	-44.181		35.6945	-41.492		35.6865	-34.417		35.7112	-36.824
35.7366	-37.28		35.7363	-40.01		35.7204	-40.988		35.7361	-44.178		35.7361	-44.178		35.7362	-41.492		35.7281	-34.417		35.7529	-36.827
35.7783	-37.282		35.778	-40.013		35.762	-40.993		35.7777	-44.176		35.7777	-44.176		35.7779	-41.492		35.7698	-34.418		35.7946	-36.829
35.82	-37.283		35.8197	-40.016		35.8037	-40.998		35.8194	-44.173		35.8194	-44.173		35.8195	-41.492		35.8115	-34.418		35.8362	-36.831
35.8616	-37.285		35.8614	-40.019		35.8454	-41.004		35.8611	-44.171		35.8611	-44.171		35.8612	-41.491		35.8531	-34.418		35.8779	-36.834
35.9033	-37.287		35.903	-40.022		35.887	-41.009		35.9027	-44.169		35.9027	-44.169		35.9029	-41.491		35.8948	-34.418		35.9196	-36.836
35.945	-37.29		35.9447	-40.026		35.9287	-41.014		35.9444	-44.167		35.9444	-44.167		35.9445	-41.491		35.9365	-34.418		35.9612	-36.839
35.9866	-37.292		35.9864	-40.029		35.9704	-41.02		35.9861	-44.165		35.9861	-44.165		35.9862	-41.491		35.9781	-34.419		36.0029	-36.841
36.0283	-37.294		36.028	-40.032		36.012	-41.025		36.0277	-44.163		36.0277	-44.163		36.0279	-41.49		36.0198	-34.419		36.0446	-36.843
36.07	-37.295		36.0697	-40.035		36.0537	-41.029		36.0694	-44.161		36.0694	-44.161		36.0695	-41.49		36.0615	-34.419		36.0862	-36.845
36.1116	-37.297		36.1114	-40.039		36.0954	-41.033		36.1111	-44.159		36.1111	-44.159		36.1112	-41.49		36.1031	-34.419		36.1279	-36.847
36.1533	-37.298		36.153	-40.042		36.137	-41.038		36.1527	-44.157		36.1527	-44.157		36.1529	-41.49		36.1448	-34.419		36.1695	-36.849
36.195	-37.299		36.1947	-40.045		36.1787	-41.043		36.1944	-44.155		36.1944	-44.155		36.1945	-41.489		36.1865	-34.42		36.2112	-36.851
36.2366	-37.3		36.2363	-40.049		36.2204	-41.047		36.2361	-44.153		36.2361	-44.153		36.2362	-41.489		36.2281	-34.42		36.2529	-36.853
36.2783	-37.301		36.278	-40.053		36.262	-41.051		36.2777	-44.15		36.2777	-44.15		36.2779	-41.488		36.2698	-34.42		36.2946	-36.855
36.32	-37.302		36.3197	-40.057		36.3037	-41.056		36.3194	-44.148		36.3194	-44.148		36.3195	-41.488		36.3115	-34.42		36.3362	-36.856
36.3616	-37.304		36.3613	-40.061		36.3454	-41.06		36.3611	-44.146		36.3611	-44.146		36.3612	-41.487		36.3531	-34.42		36.3779	-36.858
36.4033	-37.306		36.403	-40.065		36.387	-41.064		36.4027	-44.143		36.4027	-44.143		36.4029	-41.487		36.3948	-34.421		36.4196	-36.86
36.445	-37.307		36.4447	-40.069		36.4287	-41.07		36.4444	-44.141		36.4444	-44.141		36.4445	-41.486		36.4365	-34.421		36.4612	-36.862
36.4866	-37.309		36.4863	-40.073		36.4704	-41.075		36.4861	-44.139		36.4861	-44.139		36.4862	-41.486		36.4781	-34.421		36.5029	-36.864
36.5283	-37.311		36.528	-40.079		36.512	-41.08		36.5277	-44.137		36.5277	-44.137		36.5279	-41.485		36.5198	-34.421		36.5445	-36.866
36.57	-37.313		36.5697	-40.082		36.5537	-41.086		36.5694	-44.135		36.5694	-44.135		36.5695	-41.485		36.5615	-34.421		36.5862	-36.868
36.6116	-37.315		36.6113	-40.086		36.5954	-41.092		36.6111	-44.134		36.6111	-44.134		36.6112	-41.484		36.6031	-34.421		36.6279	-36.87
36.6533	-37.317		36.653	-40.09		36.637	-41.098		36.6527	-44.131		36.6527	-44.131		36.6529	-41.484		36.6448	-34.422		36.6695	-36.872
36.695	-37.318		36.6947	-40.093		36.6787	-41.103		36.6944	-44.129		36.6944	-44.129		36.6945	-41.483		36.6865	-34.422		36.7112	-36.873
36.7366	-37.32		36.7363	-40.097		36.7204	-41.108		36.7361	-44.127		36.7361	-44.127		36.7362	-41.483		36.7281	-34.422		36.7529	-36.875
36.7783	-37.321		36.778	-40.1		36.762	-41.112		36.7777	-44.125		36.7777	-44.125		36.7779	-41.482		36.7698	-34.422		36.7945	-36.876
36.82	-37.322		36.8197	-40.104		36.8037	-41.117		36.8194	-44.123		36.8194	-44.123		36.8195	-41.481		36.8115	-34.422		36.8362	-36.878
36.8616	-37.323		36.8613	-40.107		36.8454	-41.121		36.8611	-44.121		36.8611	-44.121		36.8612	-41.481		36.8531	-34.422		36.8779	-36.88
36.9033	-37.324		36.903	-40.11		36.887	-41.125		36.9027	-44.119		36.9027	-44.119		36.9029	-41.48		36.8948	-34.423		36.9195	-36.881
36.945	-37.325		36.9447	-40.113		36.9287	-41.128		36.9444	-44.116		36.9444	-44.116		36.9445	-41.479		36.9365	-34.423		36.9612	-36.883
36.9866	-37.326		36.9863	-40.117		36.9704	-41.132		36.9861	-44.114		36.9861	-44.114		36.9862	-41.478		36.9781	-34.423		37.0029	-36.885
37.0283	-37.326		37.028	-40.12		37.012	-41.135		37.0277	-44.112		37.0277	-44.112		37.0279	-41.478		37.0198	-34.423		37.0445	-36.887
37.07	-37.327		37.0697	-40.123		37.0537	-41.139		37.0694	-44.111		37.0694	-44.111		37.0695	-41.477		37.0615	-34.423		37.0862	-36.889
37.1116	-37.328		37.1113	-40.127		37.0954	-41.142		37.111	-44.109		37.111	-44.109		37.1112	-41.476		37.1031	-34.423		37.1279	-36.89
37.1533	-37.329		37.153	-40.132		37.137	-41.146		37.1527	-44.108		37.1527	-44.108		37.1529	-41.476		37.1448	-34.423		37.1695	-36.892
37.195	-37.331		37.1947	-40.136		37.1787	-41.149		37.1944	-44.106		37.1944	-44.106		37.1945	-41.475		37.1865	-34.423		37.2112	-36.894
37.2366	-37.332		37.2363	-40.139		37.2204	-41.152		37.236	-44.105		37.236	-44.105		37.2362	-41.475		37.2281	-34.423		37.2529	-36.896
37.2783	-37.333		37.278	-40.142		37.262	-41.155		37.2777	-44.103		37.2777	-44.103		37.2779	-41.474		37.2698	-34.423		37.2945	-36.897
37.32	-37.334		37.3197	-40.145		37.3037	-41.158		37.3194	-44.101		37.3194	-44.101		37.3195	-41.473		37.3115	-34.423		37.3362	-36.899
37.3616	-37.335		37.3613	-40.148		37.3454	-41.159		37.361	-44.099		37.361	-44.099		37.3612	-41.472		37.3531	-34.423		37.3779	-36.9
37.4033	-37.336		37.403	-40.15		37.387	-41.162		37.4027	-44.097		37.4027	-44.097		37.4028	-41.472		37.3948	-34.424		37.4195	-36.901
37.445	-37.337		37.4447	-40.153		37.4287	-41.165		37.4444	-44.095		37.4444	-44.095		37.4445	-41.471		37.4365	-34.424		37.4612	-36.903
37.4866	-37.338		37.4863	-40.156		37.4704	-41.169		37.486	-44.093		37.486	-44.093		37.4862	-41.47		37.4781	-34.424		37.5029	-36.904
37.5283	-37.339		37.528	-40.159		37.512	-41.174		37.5277	-44.091		37.5277	-44.091		37.5279	-41.468		37.5198	-34.424		37.5445	-36.905
37.57	-37.34		37.5697	-40.161		37.5537	-41.178		37.5694	-44.088		37.5694	-44.088		37.5695	-41.467		37.5615	-34.424		37.5862	-36.907
37.6116	-37.341		37.6113	-40.163		37.5953	-41.182		37.611	-44.086		37.611	-44.086		37.6112	-41.466		37.6031	-34.424		37.6279	-36.908
37.6533	-37.342		37.653	-40.165		37.637	-41.187		37.6527	-44.084		37.6527	-44.084		37.6529	-41.465		37.6448	-34.424		37.6695	-36.909
37.6949	-37.343		37.6947	-40.167		37.6787	-41.191		37.6944	-44.082		37.6944	-44.082		37.6945	-41.464		37.6865	-34.424		37.7112	-36.911
37.7366	-37.344		37.7363	-40.168		37.7203	-41.196		37.736	-44.08		37.736	-44.08		37.7362	-41.463		37.7281	-34.424		37.7529	-36.912
37.7783	-37.346		37.778	-40.169		37.762	-41.2		37.7777	-44.078		37.7777	-44.078		37.7779	-41.462		37.7698	-34.424		37.7945	-36.914
37.8199	-37.348		37.8197	-40.17		37.8037	-41.205		37.8194	-44.076		37.8194	-44.076		37.8195	-41.462		37.8115	-34.424		37.8362	-36.915
37.8616	-37.349		37.8613	-40.171		37.8453	-41.21		37.861	-44.074		37.861	-44.074		37.8612	-41.461		37.8531	-34.424		37.8779	-36.917
37.9033	-37.35		37.903	-40.173		37.887	-41.214		37.9027	-44.072		37.9027	-44.072		37.9029	-41.46		37.8948	-34.424		37.9195	-36.919
37.9449	-37.352		37.9447	-40.174		37.9287	-41.219		37.9444	-44.07		37.9444	-44.07		37.9445	-41.459		37.9365	-34.424		37.9612	-36.92
37.9866	-37.353		37.9863	-40.176		37.9703	-41.225		37.986	-44.067		37.986	-44.067		37.9862	-41.458		37.9781	-34.424		38.0029	-36.922
38.0283	-37.354		38.028	-40.178		38.012	-41.23		38.0277	-44.065		38.0277	-44.065		38.0279	-41.457		38.0198	-34.424		38.0445	-36.923
38.0699	-37.355		38.0697	-40.18		38.0537	-41.235		38.0694	-44.062		38.0694	-44.062		38.0695	-41.456		38.0615	-34.424		38.0862	-36.925
38.1116	-37.355		38.1113	-40.183		38.0953	-41.24		38.111	-44.06		38.111	-44.06		38.1112	-41.455		38.1031	-34.424		38.1279	-36.926
38.1533	-37.356		38.153	-40.185		38.137	-41.243		38.1527	-44.057		38.1527	-44.057		38.1528	-41.454		38.1448	-34.424		38.1695	-36.928
38.1949	-37.356		38.1947	-40.188		38.1787	-41.245		38.1944	-44.055		38.1944	-44.055		38.1945	-41.453		38.1865	-34.424		38.2112	-36.93
38.2366	-37.357		38.2363	-40.191		38.2203	-41.249		38.236	-44.052		38.236	-44.052		38.2362	-41.452		38.2281	-34.424		38.2529	-36.931
38.2783	-37.357		38.278	-40.194		38.262	-41.252		38.2777	-44.05		38.2777	-44.05		38.2778	-41.451		38.2698	-34.424		38.2945	-36.933
38.3199	-37.358		38.3196	-40.198		38.3037	-41.256		38.3194	-44.048		38.3194	-44.048		38.3195	-41.45		38.3115	-34.424		38.3362	-36.935
38.3616	-37.359		38.3613	-40.201		38.3453	-41.259		38.361	-44.046		38.361	-44.046		38.3612	-41.449		38.3531	-34.424		38.3779	-36.937
38.4033	-37.36		38.403	-40.204		38.387	-41.261		38.4027	-44.044		38.4027	-44.044		38.4028	-41.448		38.3948	-34.424		38.4195	-36.938
38.4449	-37.36		38.4446	-40.207		38.4287	-41.263		38.4444	-44.042		38.4444	-44.042		38.4445	-41.447		38.4365	-34.424		38.4612	-36.94
38.4866	-37.361		38.4863	-40.21		38.4703	-41.266		38.486	-44.04		38.486	-44.04		38.4862	-41.446		38.4781	-34.424		38.5029	-36.942
38.5283	-37.362		38.528	-40.214		38.512	-41.269		38.5277	-44.037		38.5277	-44.037		38.5278	-41.445		38.5198	-34.424		38.5445	-36.944
38.5699	-37.363		38.5696	-40.218		38.5537	-41.273		38.5694	-44.034		38.5694	-44.034		38.5695	-41.444		38.5615	-34.424		38.5862	-36.945
38.6116	-37.364		38.6113	-40.221		38.5953	-41.277		38.611	-44.032		38.611	-44.032		38.6112	-41.442		38.6031	-34.424		38.6278	-36.947
38.6533	-37.364		38.653	-40.224		38.637	-41.282		38.6527	-44.029		38.6527	-44.029		38.6528	-41.441		38.6448	-34.424		38.6695	-36.948
38.6949	-37.365		38.6946	-40.227		38.6787	-41.287		38.6944	-44.026		38.6944	-44.026		38.6945	-41.44		38.6865	-34.424		38.7112	-36.949
38.7366	-37.366		38.7363	-40.23		38.7203	-41.293		38.736	-44.024		38.736	-44.024		38.7362	-41.438		38.7281	-34.424		38.7528	-36.95
38.7783	-37.367		38.778	-40.232		38.762	-41.298		38.7777	-44.021		38.7777	-44.021		38.7778	-41.437		38.7698	-34.424		38.7945	-36.951
38.8199	-37.368		38.8196	-40.235		38.8037	-41.303		38.8194	-44.019		38.8194	-44.019		38.8195	-41.436		38.8114	-34.424		38.8362	-36.952
38.8616	-37.368		38.8613	-40.238		38.8453	-41.308		38.861	-44.016		38.861	-44.016		38.8612	-41.435		38.8531	-34.423		38.8778	-36.953
38.9033	-37.369		38.903	-40.24		38.887	-41.312		38.9027	-44.014		38.9027	-44.014		38.9028	-41.433		38.8948	-34.423		38.9195	-36.955
38.9449	-37.369		38.9446	-40.243		38.9287	-41.316		38.9444	-44.012		38.9444	-44.012		38.9445	-41.432		38.9364	-34.423		38.9612	-36.956
38.9866	-37.37		38.9863	-40.245		38.9703	-41.319		38.986	-44.009		38.986	-44.009		38.9862	-41.431		38.9781	-34.423		39.0028	-36.957
39.0283	-37.371		39.028	-40.247		39.012	-41.322		39.0277	-44.006		39.0277	-44.006		39.0278	-41.43		39.0198	-34.423		39.0445	-36.958
39.0699	-37.372		39.0696	-40.249		39.0537	-41.324		39.0694	-44.003		39.0694	-44.003		39.0695	-41.429		39.0614	-34.423		39.0862	-36.96
39.1116	-37.373		39.1113	-40.25		39.0953	-41.327		39.111	-44		39.111	-44		39.1112	-41.428		39.1031	-34.423		39.1278	-36.961
39.1533	-37.374		39.153	-40.252		39.1453	-41.33		39.161	-43.996		39.161	-43.996		39.1528	-41.427		39.1448	-34.423		39.1778	-36.963
39.1949	-37.375		39.1946	-40.253		39.187	-41.332		39.2027	-43.993		39.2027	-43.993		39.1945	-41.426		39.1864	-34.423		39.2195	-36.964
39.2366	-37.376		39.2363	-40.254		39.2287	-41.336		39.2443	-43.989		39.2443	-43.989		39.2362	-41.424		39.2281	-34.422		39.2612	-36.965
39.2783	-37.376		39.278	-40.255		39.2703	-41.34		39.286	-43.986		39.286	-43.986		39.2778	-41.423		39.2698	-34.422		39.3028	-36.966
39.3199	-37.377		39.3196	-40.256		39.312	-41.343		39.3277	-43.983		39.3277	-43.983		39.3195	-41.422		39.3114	-34.422		39.3445	-36.968
39.3616	-37.378		39.3613	-40.257		39.3537	-41.347		39.3693	-43.98		39.3693	-43.98		39.3612	-41.42		39.3531	-34.422		39.3862	-36.969
39.4033	-37.379		39.403	-40.259		39.3953	-41.35		39.411	-43.978		39.411	-43.978		39.4028	-41.419		39.3948	-34.422		39.4278	-36.97
39.4449	-37.38		39.4446	-40.261		39.437	-41.354		39.4527	-43.976		39.4527	-43.976		39.4445	-41.417		39.4364	-34.422		39.4695	-36.971
39.4866	-37.381		39.4863	-40.263		39.4787	-41.358		39.4943	-43.973		39.4943	-43.973		39.4862	-41.416		39.4781	-34.421		39.5112	-36.972
39.5283	-37.381		39.528	-40.265		39.5203	-41.363		39.536	-43.971		39.536	-43.971		39.5278	-41.415		39.5198	-34.421		39.5528	-36.973
39.5699	-37.382		39.5696	-40.268		39.562	-41.368		39.5777	-43.968		39.5777	-43.968		39.5695	-41.414		39.5614	-34.421		39.5945	-36.974
39.6116	-37.383		39.6113	-40.27		39.6037	-41.372		39.6193	-43.965		39.6193	-43.965		39.6112	-41.413		39.6031	-34.421		39.6362	-36.975
39.6533	-37.384		39.653	-40.273		39.6453	-41.376		39.661	-43.962		39.661	-43.962		39.6528	-41.412		39.6448	-34.421		39.6778	-36.977
39.6949	-37.386		39.6946	-40.275		39.6937	-41.38		39.7027	-43.96		39.7027	-43.96		39.6945	-41.411		39.6864	-34.42		39.7195	-36.978
39.7366	-37.387		39.7363	-40.278		39.7353	-41.384		39.7443	-43.957		39.7443	-43.957		39.7362	-41.41		39.7281	-34.42		39.7612	-36.98
39.7783	-37.388		39.778	-40.28		39.777	-41.387		39.786	-43.954		39.786	-43.954		39.7778	-41.408		39.7698	-34.42		39.8028	-36.981
39.8199	-37.389		39.8196	-40.282		39.8186	-41.389		39.8277	-43.952		39.8277	-43.952		39.8195	-41.407		39.8114	-34.42		39.8445	-36.982
39.8616	-37.39		39.8613	-40.284		39.8603	-41.391		39.8693	-43.949		39.8693	-43.949		39.8612	-41.405		39.8531	-34.42		39.8862	-36.984
39.9032	-37.391		39.903	-40.286		39.902	-41.394		39.911	-43.947		39.911	-43.947		39.9028	-41.404		39.8948	-34.419		39.9278	-36.985
39.9449	-37.392		39.9446	-40.289		39.9436	-41.397		39.9527	-43.944		39.9527	-43.944		39.9445	-41.402		39.9364	-34.419		39.9695	-36.986
39.9866	-37.393		39.9863	-40.291		39.9853	-41.4		39.9943	-43.942		39.9943	-43.942		39.9862	-41.401		39.9781	-34.419		40.0112	-36.987
40.0283	-37.394		40.028	-40.294		40.027	-41.404		40.036	-43.94		40.036	-43.94		40.0278	-41.4		40.0198	-34.419		40.0528	-36.988
40.0699	-37.395		40.0696	-40.296		40.0686	-41.408		40.0777	-43.938		40.0777	-43.938		40.0695	-41.399		40.0614	-34.419		40.0945	-36.989
40.1116	-37.396		40.1113	-40.298		40.1103	-41.413		40.1193	-43.936		40.1193	-43.936		40.1112	-41.398		40.1031	-34.419		40.1362	-36.991
40.1533	-37.397		40.1529	-40.3		40.152	-41.417		40.161	-43.933		40.161	-43.933		40.1528	-41.397		40.1448	-34.418		40.1778	-36.992
40.1949	-37.398		40.1946	-40.303		40.1936	-41.421		40.2027	-43.931		40.2027	-43.931		40.1945	-41.396		40.1864	-34.418		40.2195	-36.993
40.2366	-37.4		40.2363	-40.305		40.2353	-41.423		40.2443	-43.928		40.2443	-43.928		40.2362	-41.395		40.2281	-34.418		40.2612	-36.995
40.2782	-37.401		40.2779	-40.308		40.277	-41.425		40.286	-43.925		40.286	-43.925		40.2778	-41.394		40.2698	-34.418		40.3028	-36.996
40.3199	-37.402		40.3196	-40.312		40.3186	-41.428		40.3277	-43.923		40.3277	-43.923		40.3195	-41.394		40.3114	-34.417		40.3445	-36.998
40.3616	-37.404		40.3613	-40.315		40.3603	-41.431		40.3693	-43.92		40.3693	-43.92		40.3612	-41.393		40.3531	-34.417		40.3862	-36.999
40.4032	-37.405		40.4029	-40.318		40.402	-41.434		40.411	-43.918		40.411	-43.918		40.4028	-41.391		40.3948	-34.417		40.4278	-37.001
40.4449	-37.406		40.4446	-40.321		40.4436	-41.437		40.4527	-43.916		40.4527	-43.916		40.4445	-41.39		40.4364	-34.417		40.4695	-37.003
40.4866	-37.408		40.4863	-40.323		40.4853	-41.44		40.4943	-43.914		40.4943	-43.914		40.4862	-41.389		40.4781	-34.417		40.5112	-37.005
40.5282	-37.409		40.5279	-40.324		40.527	-41.444		40.536	-43.912		40.536	-43.912		40.5278	-41.388		40.5198	-34.416		40.5528	-37.006
40.5699	-37.41		40.5696	-40.326		40.5686	-41.447		40.5777	-43.91		40.5777	-43.91		40.5695	-41.387		40.5614	-34.416		40.5945	-37.008
40.6116	-37.411		40.6113	-40.327		40.6103	-41.451		40.6193	-43.908		40.6193	-43.908		40.6112	-41.387		40.6031	-34.416		40.6362	-37.01
40.6532	-37.412		40.6529	-40.328		40.652	-41.454		40.661	-43.906		40.661	-43.906		40.6528	-41.386		40.6448	-34.416		40.6778	-37.012
40.6949	-37.413		40.6946	-40.33		40.6936	-41.459		40.7027	-43.905		40.7027	-43.905		40.6945	-41.385		40.6864	-34.416		40.7195	-37.013
40.7366	-37.414		40.7363	-40.332		40.7353	-41.463		40.7443	-43.903		40.7443	-43.903		40.7362	-41.384		40.7281	-34.415		40.7612	-37.015
40.7782	-37.415		40.7779	-40.334		40.777	-41.468		40.786	-43.901		40.786	-43.901		40.7778	-41.384		40.7698	-34.415		40.8028	-37.017
40.8199	-37.416		40.8196	-40.336		40.8186	-41.472		40.8277	-43.899		40.8277	-43.899		40.8195	-41.383		40.8114	-34.415		40.8445	-37.019
40.8616	-37.418		40.8613	-40.338		40.8603	-41.475		40.8693	-43.897		40.8693	-43.897		40.8612	-41.382		40.8531	-34.415		40.8861	-37.021
40.9032	-37.419		40.9029	-40.341		40.902	-41.479		40.911	-43.895		40.911	-43.895		40.9028	-41.381		40.8948	-34.414		40.9278	-37.023
40.9449	-37.42		40.9446	-40.344		40.9436	-41.482		40.9527	-43.894		40.9527	-43.894		40.9445	-41.381		40.9364	-34.414		40.9695	-37.025
40.9866	-37.422		40.9863	-40.348		40.9853	-41.486		40.9943	-43.892		40.9943	-43.892		40.9862	-41.38		40.9781	-34.414		41.0111	-37.028
41.0282	-37.424		41.0279	-40.352		41.027	-41.49		41.036	-43.891		41.036	-43.891		41.0278	-41.379		41.0197	-34.414		41.0528	-37.03
41.0699	-37.426		41.0696	-40.356		41.0686	-41.493		41.0777	-43.89		41.0777	-43.89		41.0695	-41.378		41.0614	-34.414		41.0945	-37.032
41.1116	-37.428		41.1113	-40.36		41.1103	-41.496		41.1193	-43.889		41.1193	-43.889		41.1112	-41.377		41.1031	-34.414		41.1362	-37.035
41.1532	-37.43		41.1529	-40.363		41.152	-41.5		41.161	-43.888		41.161	-43.888		41.1528	-41.376		41.1447	-34.413		41.1778	-37.037
41.1949	-37.432		41.1946	-40.365		41.1936	-41.503		41.2027	-43.887		41.2027	-43.887		41.1945	-41.376		41.1864	-34.413		41.2195	-37.04
41.2366	-37.434		41.2363	-40.368		41.2353	-41.506		41.2443	-43.886		41.2443	-43.886		41.2362	-41.375		41.2281	-34.413		41.2612	-37.042
41.2782	-37.435		41.2779	-40.371		41.277	-41.51		41.286	-43.885		41.286	-43.885		41.2778	-41.374		41.2697	-34.413		41.3028	-37.044
41.3199	-37.437		41.3196	-40.373		41.3186	-41.513		41.3276	-43.884		41.3276	-43.884		41.3195	-41.374		41.3114	-34.413		41.3445	-37.046
41.3616	-37.439		41.3613	-40.376		41.3603	-41.518		41.3693	-43.883		41.3693	-43.883		41.3612	-41.373		41.3531	-34.413		41.3861	-37.048
41.4032	-37.44		41.4029	-40.379		41.402	-41.522		41.411	-43.882		41.411	-43.882		41.4028	-41.373		41.3947	-34.413		41.4278	-37.05
41.4449	-37.442		41.4446	-40.383		41.4436	-41.525		41.4526	-43.88		41.4526	-43.88		41.4445	-41.373		41.4364	-34.413		41.4695	-37.052
41.4866	-37.444		41.4863	-40.387		41.4853	-41.528		41.4943	-43.879		41.4943	-43.879		41.4862	-41.372		41.4781	-34.413		41.5111	-37.054
41.5282	-37.445		41.5279	-40.391		41.527	-41.533		41.536	-43.878		41.536	-43.878		41.5278	-41.371		41.5197	-34.412		41.5528	-37.057
41.5699	-37.447		41.5696	-40.395		41.5686	-41.537		41.5776	-43.877		41.5776	-43.877		41.5695	-41.371		41.5614	-34.412		41.5945	-37.059
41.6116	-37.449		41.6113	-40.4		41.6103	-41.542		41.6193	-43.876		41.6193	-43.876		41.6112	-41.37		41.6031	-34.412		41.6361	-37.062
41.6532	-37.451		41.6529	-40.405		41.652	-41.547		41.661	-43.876		41.661	-43.876		41.6528	-41.369		41.6447	-34.412		41.6778	-37.064
41.6949	-37.454		41.6946	-40.409		41.6936	-41.553		41.7026	-43.875		41.7026	-43.875		41.6945	-41.368		41.6864	-34.412		41.7195	-37.067
41.7366	-37.456		41.7363	-40.412		41.7353	-41.558		41.7443	-43.875		41.7443	-43.875		41.7361	-41.368		41.7281	-34.412		41.7611	-37.07
41.7782	-37.458		41.7779	-40.415		41.777	-41.563		41.786	-43.874		41.786	-43.874		41.7778	-41.367		41.7697	-34.412		41.8028	-37.073
41.8199	-37.46		41.8196	-40.417		41.8186	-41.568		41.8276	-43.874		41.8276	-43.874		41.8195	-41.366		41.8114	-34.412		41.8445	-37.075
41.8616	-37.462		41.8613	-40.419		41.8603	-41.574		41.8693	-43.873		41.8693	-43.873		41.8612	-41.366		41.8531	-34.412		41.8861	-37.078
41.9032	-37.464		41.9029	-40.421		41.902	-41.58		41.911	-43.873		41.911	-43.873		41.9028	-41.365		41.8947	-34.412		41.9278	-37.081
41.9449	-37.467		41.9446	-40.424		41.9436	-41.587		41.9526	-43.872		41.9526	-43.872		41.9445	-41.365		41.9364	-34.412		41.9695	-37.083
41.9866	-37.468		41.9863	-40.428		41.9853	-41.594		41.9943	-43.872		41.9943	-43.872		41.9862	-41.364		41.9781	-34.412		42.0111	-37.086
42.0282	-37.47		42.0279	-40.431		42.027	-41.601		42.036	-43.871		42.036	-43.871		42.0278	-41.363		42.0197	-34.412		42.0528	-37.088
42.0699	-37.471		42.0696	-40.436		42.0686	-41.608		42.0776	-43.871		42.0776	-43.871		42.0695	-41.362		42.0614	-34.412		42.0945	-37.091
42.1116	-37.472		42.1112	-40.441		42.1103	-41.614		42.1193	-43.87		42.1193	-43.87		42.1112	-41.362		42.1031	-34.412		42.1361	-37.093
42.1532	-37.474		42.1529	-40.446		42.152	-41.621		42.161	-43.869		42.161	-43.869		42.1528	-41.361		42.1447	-34.412		42.1778	-37.096
42.1949	-37.475		42.1946	-40.452		42.1936	-41.628		42.2026	-43.869		42.2026	-43.869		42.1945	-41.36		42.1864	-34.412		42.2195	-37.098
42.2366	-37.477		42.2362	-40.459		42.2353	-41.634		42.2443	-43.868		42.2443	-43.868		42.2362	-41.358		42.2281	-34.412		42.2611	-37.101
42.2782	-37.479		42.2779	-40.467		42.2769	-41.641		42.286	-43.867		42.286	-43.867		42.2778	-41.357		42.2697	-34.412		42.3028	-37.104
42.3199	-37.481		42.3196	-40.475		42.3186	-41.647		42.3276	-43.867		42.3276	-43.867		42.3195	-41.356		42.3181	-34.412		42.3445	-37.107
42.3616	-37.483		42.3613	-40.483		42.3603	-41.653		42.3693	-43.866		42.3693	-43.866		42.3611	-41.355		42.3597	-34.412		42.3861	-37.11
42.4032	-37.486		42.4029	-40.49		42.4019	-41.66		42.411	-43.866		42.411	-43.866		42.4028	-41.354		42.4014	-34.412		42.4278	-37.113
42.4449	-37.488		42.4446	-40.498		42.4436	-41.667		42.4526	-43.865		42.4526	-43.865		42.4445	-41.353		42.4431	-34.412		42.4695	-37.116
42.4866	-37.49		42.4863	-40.506		42.4853	-41.673		42.4943	-43.865		42.4943	-43.865		42.4861	-41.352		42.4847	-34.412		42.5111	-37.119
42.5282	-37.492		42.5279	-40.514		42.5269	-41.679		42.536	-43.864		42.536	-43.864		42.5278	-41.351		42.5264	-34.412		42.5528	-37.122
42.5699	-37.494		42.5696	-40.522		42.5686	-41.685		42.5776	-43.863		42.5776	-43.863		42.5695	-41.349		42.5681	-34.412		42.5944	-37.124
42.6116	-37.495		42.6112	-40.529		42.6103	-41.69		42.6193	-43.862		42.6193	-43.862		42.6111	-41.348		42.6097	-34.412		42.6361	-37.126
42.6532	-37.497		42.6529	-40.536		42.6519	-41.694		42.661	-43.861		42.661	-43.861		42.6528	-41.346		42.6514	-34.412		42.6778	-37.128
42.6949	-37.498		42.6946	-40.543		42.6936	-41.699		42.7026	-43.861		42.7026	-43.861		42.6945	-41.345		42.6931	-34.412		42.7194	-37.13
42.7366	-37.5		42.7362	-40.55		42.7353	-41.704		42.7443	-43.86		42.7443	-43.86		42.7361	-41.343		42.7347	-34.412		42.7611	-37.132
42.7782	-37.501		42.7779	-40.556		42.7769	-41.708		42.786	-43.859		42.786	-43.859		42.7778	-41.341		42.7764	-34.412		42.8028	-37.134
42.8199	-37.502		42.8196	-40.563		42.8186	-41.713		42.8276	-43.858		42.8276	-43.858		42.8195	-41.339		42.8181	-34.413		42.8445	-37.136
42.8616	-37.503		42.8612	-40.569		42.8603	-41.717		42.8693	-43.858		42.8693	-43.858		42.8611	-41.337		42.8597	-34.413		42.8861	-37.138
42.9032	-37.505		42.9029	-40.576		42.9019	-41.72		42.911	-43.857		42.911	-43.857		42.9028	-41.336		42.9014	-34.413		42.9278	-37.14
42.9449	-37.506		42.9446	-40.583		42.9436	-41.723		42.9526	-43.857		42.9526	-43.857		42.9445	-41.334		42.9431	-34.413		42.9695	-37.143
42.9866	-37.507		42.9862	-40.59		42.9853	-41.727		42.9943	-43.856		42.9943	-43.856		42.9861	-41.332		42.9847	-34.413		43.0111	-37.145
43.0282	-37.509		43.0279	-40.597		43.0269	-41.733		43.036	-43.856		43.036	-43.856		43.0278	-41.33		43.0264	-34.413		43.0528	-37.148
43.0699	-37.51		43.0696	-40.604		43.0686	-41.74		43.0776	-43.855		43.0776	-43.855		43.0695	-41.328		43.068	-34.413		43.0944	-37.15
43.1116	-37.511		43.1112	-40.611		43.1103	-41.748		43.1193	-43.854		43.1193	-43.854		43.1111	-41.326		43.1097	-34.413		43.1361	-37.152
43.1532	-37.512		43.1529	-40.618		43.1519	-41.758		43.161	-43.853		43.161	-43.853		43.1528	-41.324		43.1514	-34.413		43.1778	-37.155
43.1949	-37.513		43.1946	-40.625		43.1936	-41.766		43.2026	-43.852		43.2026	-43.852		43.1945	-41.321		43.193	-34.414		43.2195	-37.157
43.2365	-37.514		43.2362	-40.631		43.2353	-41.775		43.2443	-43.851		43.2443	-43.851		43.2361	-41.319		43.2347	-34.414		43.2611	-37.159
43.2782	-37.515		43.2779	-40.636		43.277	-41.784		43.286	-43.85		43.286	-43.85		43.2778	-41.316		43.2764	-34.414		43.3028	-37.16
43.3199	-37.516		43.3196	-40.641		43.3186	-41.792		43.3276	-43.849		43.3276	-43.849		43.3195	-41.312		43.318	-34.414		43.3445	-37.162
43.3615	-37.516		43.3696	-40.646		43.3603	-41.8		43.3693	-43.848		43.3693	-43.848		43.3611	-41.308		43.3597	-34.414		43.3861	-37.164
43.4032	-37.517		43.4179	-40.652		43.4019	-41.805		43.411	-43.847		43.411	-43.847		43.4028	-41.304		43.4014	-34.414		43.4278	-37.165
43.4449	-37.517		43.4596	-40.656		43.4436	-41.809		43.4526	-43.846		43.4526	-43.846		43.4445	-41.301		43.443	-34.414		43.4695	-37.167
43.4866	-37.518		43.5012	-40.661		43.4853	-41.814		43.4943	-43.845		43.4943	-43.845		43.4861	-41.297		43.4847	-34.414		43.5111	-37.168
43.5282	-37.518		43.5429	-40.666		43.5269	-41.818		43.536	-43.843		43.536	-43.843		43.5278	-41.293		43.5264	-34.414		43.5528	-37.17
43.5699	-37.519		43.5846	-40.67		43.5686	-41.822		43.5776	-43.842		43.5776	-43.842		43.5695	-41.289		43.568	-34.414		43.5945	-37.171
43.6115	-37.52		43.6262	-40.674		43.6103	-41.827		43.6193	-43.84		43.6193	-43.84		43.6111	-41.285		43.6097	-34.414		43.6361	-37.172
43.6532	-37.521		43.6679	-40.678		43.6519	-41.831		43.661	-43.839		43.661	-43.839		43.6528	-41.282		43.6514	-34.414		43.6778	-37.173
43.6949	-37.521		43.7096	-40.682		43.6936	-41.835		43.7026	-43.837		43.7026	-43.837		43.6945	-41.277		43.693	-34.414		43.7195	-37.175
43.7365	-37.522		43.7512	-40.686		43.7353	-41.84		43.7443	-43.834		43.7443	-43.834		43.7361	-41.273		43.7347	-34.414		43.7611	-37.176
43.7782	-37.523		43.7929	-40.689		43.7769	-41.846		43.786	-43.832		43.786	-43.832		43.7778	-41.268		43.7764	-34.414		43.8028	-37.177
43.8199	-37.523		43.8346	-40.693		43.8186	-41.851		43.8276	-43.829		43.8276	-43.829		43.8195	-41.263		43.818	-34.414		43.8445	-37.178
43.8615	-37.523		43.8762	-40.698		43.8603	-41.858		43.8693	-43.826		43.8693	-43.826		43.8611	-41.258		43.8597	-34.414		43.8861	-37.178
43.9032	-37.524		43.9179	-40.701		43.9019	-41.864		43.911	-43.824		43.911	-43.824		43.9028	-41.253		43.9014	-34.414		43.9278	-37.179
43.9449	-37.524		43.9596	-40.705		43.9436	-41.87		43.9526	-43.821		43.9526	-43.821		43.9445	-41.248		43.943	-34.414		43.9695	-37.179
43.9865	-37.524		44.0012	-40.709		43.9853	-41.876		43.9943	-43.819		43.9943	-43.819		43.9861	-41.243		43.9847	-34.414		44.0111	-37.18
44.0282	-37.524		44.0429	-40.713		44.0269	-41.882		44.036	-43.816		44.036	-43.816		44.0278	-41.238		44.0264	-34.414		44.0528	-37.18
44.0765	-37.524		44.0846	-40.716		44.0686	-41.887		44.0776	-43.813		44.0776	-43.813		44.0695	-41.232		44.068	-34.414		44.0944	-37.18
44.1182	-37.525		44.1262	-40.72		44.1103	-41.892		44.1193	-43.81		44.1193	-43.81		44.1111	-41.227		44.1097	-34.414		44.1361	-37.181
44.1599	-37.525		44.1679	-40.723		44.1519	-41.897		44.161	-43.807		44.161	-43.807		44.1528	-41.222		44.1514	-34.414		44.1778	-37.181
44.2015	-37.525		44.2096	-40.725		44.1936	-41.901		44.2026	-43.803		44.2026	-43.803		44.2011	-41.215		44.193	-34.414		44.2194	-37.181
44.2432	-37.525		44.2512	-40.727		44.2353	-41.904		44.2443	-43.799		44.2443	-43.799		44.2428	-41.21		44.2347	-34.414		44.2611	-37.182
44.2849	-37.525		44.2929	-40.729		44.2769	-41.907		44.286	-43.795		44.286	-43.795		44.2845	-41.204		44.2764	-34.414		44.3094	-37.182
44.3265	-37.526		44.3346	-40.732		44.3186	-41.909		44.3276	-43.79		44.3276	-43.79		44.3261	-41.197		44.318	-34.414		44.3511	-37.182
44.3682	-37.526		44.3762	-40.734		44.3603	-41.912		44.3693	-43.786		44.3693	-43.786		44.3678	-41.19		44.3597	-34.414		44.3928	-37.183
44.4099	-37.526		44.4179	-40.737		44.4019	-41.914		44.411	-43.781		44.411	-43.781		44.4094	-41.183		44.4014	-34.413		44.4344	-37.183
44.4515	-37.526		44.4596	-40.739		44.4436	-41.917		44.4526	-43.777		44.4526	-43.777		44.4511	-41.176		44.443	-34.413		44.4761	-37.183
44.4932	-37.526		44.5012	-40.741		44.4853	-41.918		44.4943	-43.772		44.4943	-43.772		44.4928	-41.169		44.4847	-34.413		44.5178	-37.183
44.5349	-37.526		44.5429	-40.744		44.5269	-41.918		44.5359	-43.767		44.5359	-43.767		44.5344	-41.162		44.5264	-34.413		44.5594	-37.183
44.5765	-37.526		44.5846	-40.746		44.5686	-41.919		44.5776	-43.762		44.5776	-43.762		44.5761	-41.155		44.568	-34.413		44.6011	-37.184
44.6182	-37.526		44.6262	-40.746		44.6103	-41.921		44.6193	-43.757		44.6193	-43.757		44.6178	-41.149		44.6097	-34.413		44.6428	-37.184
44.6599	-37.526		44.6679	-40.747		44.6519	-41.923		44.6609	-43.752		44.6609	-43.752		44.6594	-41.142		44.6514	-34.413		44.6844	-37.184
44.7015	-37.526		44.7096	-40.747		44.6936	-41.925		44.7026	-43.746		44.7026	-43.746		44.7011	-41.135		44.693	-34.412		44.7261	-37.184
44.7432	-37.526		44.7512	-40.748		44.7353	-41.928		44.7443	-43.74		44.7443	-43.74		44.7428	-41.128		44.7347	-34.412		44.7678	-37.184
44.7849	-37.526		44.7929	-40.749		44.7769	-41.931		44.7859	-43.733		44.7859	-43.733		44.7844	-41.12		44.7764	-34.412		44.8094	-37.184
44.8265	-37.526		44.8346	-40.75		44.8186	-41.933		44.8276	-43.726		44.8276	-43.726		44.8261	-41.111		44.818	-34.412		44.8511	-37.184
44.8682	-37.526		44.8762	-40.751		44.8603	-41.934		44.8693	-43.719		44.8693	-43.719		44.8678	-41.103		44.8597	-34.412		44.8928	-37.184
44.9098	-37.526		44.9179	-40.752		44.9019	-41.936		44.9109	-43.713		44.9109	-43.713		44.9094	-41.096		44.9014	-34.411		44.9344	-37.184
44.9515	-37.526		44.9596	-40.752		44.9436	-41.938		44.9526	-43.706		44.9526	-43.706		44.9511	-41.088		44.943	-34.411		44.9761	-37.184
44.9932	-37.526		45.0012	-40.753		44.9853	-41.94		44.9943	-43.7		44.9943	-43.7		44.9928	-41.08		44.9847	-34.411		45.0178	-37.184
45.0349	-37.526		45.0429	-40.754		45.0269	-41.942		45.0359	-43.694		45.0359	-43.694		45.0344	-41.074		45.0264	-34.41		45.0594	-37.184
45.0765	-37.526		45.0846	-40.754		45.0686	-41.944		45.0776	-43.687		45.0776	-43.687		45.0761	-41.067		45.068	-34.41		45.1011	-37.184
45.1182	-37.526		45.1262	-40.755		45.1103	-41.947		45.1193	-43.68		45.1193	-43.68		45.1178	-41.06		45.1097	-34.409		45.1428	-37.184
45.1599	-37.526		45.1679	-40.755		45.1519	-41.95		45.1609	-43.673		45.1609	-43.673		45.1594	-41.053		45.1513	-34.409		45.1844	-37.184
45.2015	-37.526		45.2096	-40.756		45.1936	-41.952		45.2026	-43.666		45.2026	-43.666		45.2011	-41.045		45.193	-34.408		45.2261	-37.184
45.2432	-37.525		45.2512	-40.756		45.2353	-41.955		45.2443	-43.657		45.2443	-43.657		45.2428	-41.037		45.2347	-34.408		45.2678	-37.184
45.2848	-37.525		45.2929	-40.756		45.2769	-41.957		45.2859	-43.649		45.2859	-43.649		45.2844	-41.029		45.2763	-34.407		45.3094	-37.183
45.3265	-37.525		45.3346	-40.757		45.3186	-41.959		45.3276	-43.641		45.3276	-43.641		45.3261	-41.02		45.318	-34.406		45.3511	-37.183
45.3682	-37.525		45.3762	-40.757		45.3603	-41.961		45.3693	-43.634		45.3693	-43.634		45.3678	-41.011		45.3597	-34.405		45.3927	-37.183
45.4098	-37.525		45.4179	-40.757		45.4019	-41.963		45.4176	-43.625		45.4176	-43.625		45.4094	-41.003		45.4014	-34.404		45.4344	-37.183
45.4515	-37.524		45.4596	-40.757		45.4436	-41.964		45.4593	-43.617		45.4593	-43.617		45.4511	-40.995		45.443	-34.403		45.4761	-37.183
45.4932	-37.524		45.5012	-40.757		45.4853	-41.965		45.5009	-43.609		45.5009	-43.609		45.4928	-40.988		45.4847	-34.402		45.5177	-37.182
45.5348	-37.524		45.5429	-40.757		45.5269	-41.967		45.5426	-43.602		45.5426	-43.602		45.5344	-40.98		45.5264	-34.401		45.5594	-37.182
45.5765	-37.523		45.5846	-40.758		45.5686	-41.967		45.5843	-43.594		45.5843	-43.594		45.5761	-40.972		45.568	-34.399		45.6011	-37.182
45.6182	-37.523		45.6262	-40.758		45.6103	-41.968		45.6259	-43.585		45.6259	-43.585		45.6178	-40.964		45.6097	-34.397		45.6428	-37.181
45.6598	-37.522		45.6679	-40.758		45.6519	-41.968		45.6676	-43.576		45.6676	-43.576		45.6594	-40.956		45.6514	-34.395		45.6844	-37.181
45.7015	-37.521		45.7096	-40.758		45.6936	-41.968		45.7093	-43.566		45.7093	-43.566		45.7011	-40.947		45.693	-34.394		45.7261	-37.18
45.7432	-37.519		45.7512	-40.758		45.7353	-41.969		45.7509	-43.557		45.7509	-43.557		45.7428	-40.937		45.7347	-34.392		45.7678	-37.179
45.7848	-37.518		45.7929	-40.758		45.7769	-41.969		45.7926	-43.547		45.7926	-43.547		45.7844	-40.928		45.7764	-34.39		45.8094	-37.178
45.8265	-37.516		45.8346	-40.758		45.8186	-41.97		45.8343	-43.538		45.8343	-43.538		45.8261	-40.919		45.818	-34.388		45.8511	-37.177
45.8682	-37.514		45.8762	-40.758		45.8602	-41.971		45.8759	-43.529		45.8759	-43.529		45.8678	-40.91		45.8597	-34.386		45.8928	-37.175
45.9099	-37.511		45.9179	-40.757		45.9019	-41.972		45.9176	-43.52		45.9176	-43.52		45.9094	-40.902		45.9013	-34.384		45.9344	-37.173
45.9515	-37.508		45.9596	-40.757		45.9436	-41.972		45.9593	-43.512		45.9593	-43.512		45.9511	-40.893		45.943	-34.382		45.9761	-37.172
45.9932	-37.506		46.0012	-40.757		45.9852	-41.973		46.0009	-43.503		46.0009	-43.503		45.9928	-40.884		45.9847	-34.379		46.0177	-37.17
46.0349	-37.503		46.0429	-40.757		46.0269	-41.974		46.0426	-43.494		46.0426	-43.494		46.0344	-40.875		46.0263	-34.377		46.0594	-37.168
46.0765	-37.5		46.0846	-40.757		46.0686	-41.975		46.0843	-43.484		46.0843	-43.484		46.0761	-40.865		46.068	-34.374		46.1011	-37.165
46.1182	-37.498		46.1262	-40.757		46.1102	-41.976		46.1259	-43.474		46.1259	-43.474		46.1178	-40.856		46.1097	-34.371		46.1428	-37.163
46.1598	-37.494		46.1679	-40.757		46.1519	-41.976		46.1676	-43.464		46.1676	-43.464		46.1594	-40.845		46.1514	-34.368		46.1844	-37.159
46.2015	-37.491		46.2096	-40.757		46.1936	-41.976		46.2093	-43.454		46.2093	-43.454		46.2011	-40.835		46.193	-34.365		46.2261	-37.156
46.2432	-37.487		46.2512	-40.757		46.2352	-41.977		46.251	-43.445		46.251	-43.445		46.2428	-40.824		46.2347	-34.362		46.2677	-37.152
46.2848	-37.483		46.2929	-40.756		46.2769	-41.977		46.2926	-43.434		46.2926	-43.434		46.2844	-40.814		46.2763	-34.359		46.3094	-37.148
46.3265	-37.479		46.3346	-40.756		46.3186	-41.977		46.3343	-43.424		46.3343	-43.424		46.3261	-40.804		46.318	-34.356		46.3511	-37.143
46.3682	-37.474		46.3762	-40.755		46.3602	-41.977		46.3759	-43.414		46.3759	-43.414		46.3678	-40.794		46.3597	-34.353		46.3927	-37.138
46.4098	-37.47		46.4179	-40.754		46.4019	-41.977		46.4176	-43.404		46.4176	-43.404		46.4094	-40.784		46.4013	-34.35		46.4344	-37.132
46.4515	-37.466		46.4596	-40.753		46.4436	-41.977		46.4593	-43.393		46.4593	-43.393		46.4511	-40.774		46.443	-34.347		46.4761	-37.127
46.4932	-37.462		46.5012	-40.751		46.4852	-41.977		46.5009	-43.382		46.5009	-43.382		46.4928	-40.764		46.4847	-34.343		46.5177	-37.121
46.5348	-37.457		46.5429	-40.75		46.5269	-41.978		46.5426	-43.371		46.5426	-43.371		46.5344	-40.754		46.5263	-34.34		46.5594	-37.115
46.5765	-37.452		46.5846	-40.748		46.5686	-41.978		46.5843	-43.358		46.5843	-43.358		46.5761	-40.742		46.568	-34.336		46.6011	-37.109
46.6182	-37.447		46.6262	-40.745		46.6102	-41.978		46.6259	-43.345		46.6259	-43.345		46.6178	-40.731		46.6097	-34.332		46.6427	-37.103
46.6598	-37.442		46.6679	-40.743		46.6519	-41.978		46.6676	-43.333		46.6676	-43.333		46.6594	-40.72		46.6513	-34.328		46.6844	-37.096
46.7015	-37.437		46.7095	-40.741		46.6936	-41.978		46.7093	-43.321		46.7093	-43.321		46.7011	-40.709		46.693	-34.323		46.7261	-37.089
46.7432	-37.431		46.7512	-40.738		46.7352	-41.978		46.7509	-43.311		46.7509	-43.311		46.7428	-40.699		46.7347	-34.319		46.7677	-37.081
46.7848	-37.425		46.7929	-40.734		46.7769	-41.978		46.7926	-43.3		46.7926	-43.3		46.7844	-40.688		46.7763	-34.315		46.8094	-37.073
46.8265	-37.419		46.8345	-40.729		46.8186	-41.978		46.8343	-43.288		46.8343	-43.288		46.8261	-40.678		46.818	-34.311		46.8511	-37.065
46.8682	-37.412		46.8762	-40.725		46.8602	-41.977		46.8759	-43.277		46.8759	-43.277		46.8678	-40.668		46.8597	-34.308		46.8927	-37.057
46.9098	-37.406		46.9179	-40.721		46.9019	-41.977		46.9176	-43.265		46.9176	-43.265		46.9094	-40.657		46.9013	-34.304		46.9344	-37.05
46.9515	-37.4		46.9595	-40.716		46.9436	-41.977		46.9593	-43.253		46.9593	-43.253		46.9511	-40.645		46.943	-34.301		46.9761	-37.043
46.9932	-37.394		47.0012	-40.708		46.9852	-41.977		47.0009	-43.241		47.0009	-43.241		46.9928	-40.633		46.9847	-34.298		47.0177	-37.037
47.0348	-37.388		47.0429	-40.701		47.0269	-41.977		47.0426	-43.228		47.0426	-43.228		47.0344	-40.62		47.0263	-34.294		47.0594	-37.03
47.0765	-37.383		47.0845	-40.693		47.0686	-41.976		47.0843	-43.215		47.0843	-43.215		47.0761	-40.608		47.068	-34.29		47.1011	-37.023
47.1182	-37.376		47.1262	-40.684		47.1102	-41.976		47.1259	-43.202		47.1259	-43.202		47.1178	-40.595		47.1097	-34.286		47.1427	-37.016
47.1598	-37.37		47.1679	-40.676		47.1519	-41.976		47.1676	-43.189		47.1676	-43.189		47.1594	-40.583		47.1513	-34.282		47.1844	-37.009
47.2015	-37.362		47.2095	-40.667		47.1936	-41.976		47.2093	-43.177		47.2093	-43.177		47.2011	-40.573		47.193	-34.277		47.2261	-37
47.2432	-37.355		47.2512	-40.659		47.2352	-41.975		47.2509	-43.164		47.2509	-43.164		47.2428	-40.562		47.2347	-34.272		47.2677	-36.992
47.2848	-37.348		47.2929	-40.65		47.2769	-41.975		47.2926	-43.15		47.2926	-43.15		47.2844	-40.551		47.2763	-34.268		47.3094	-36.983
47.3265	-37.341		47.3345	-40.64		47.3186	-41.973		47.3343	-43.135		47.3343	-43.135		47.3261	-40.539		47.318	-34.263		47.3511	-36.974
47.3682	-37.335		47.3762	-40.63		47.3602	-41.972		47.3759	-43.12		47.3759	-43.12		47.3678	-40.526		47.3597	-34.259		47.3927	-36.966
47.4098	-37.328		47.4179	-40.62		47.4019	-41.97		47.4176	-43.104		47.4176	-43.104		47.4094	-40.513		47.4013	-34.254		47.4344	-36.958
47.4515	-37.321		47.4596	-40.61		47.4435	-41.968		47.4592	-43.089		47.4592	-43.089		47.4511	-40.499		47.443	-34.25		47.4761	-36.95
47.4932	-37.315		47.5012	-40.599		47.4852	-41.965		47.5009	-43.073		47.5009	-43.073		47.4928	-40.486		47.4847	-34.246		47.5177	-36.942
47.5348	-37.308		47.5429	-40.587		47.5269	-41.962		47.5426	-43.058		47.5426	-43.058		47.5344	-40.473		47.5263	-34.241		47.5594	-36.934
47.5765	-37.3		47.5845	-40.573		47.5685	-41.957		47.5842	-43.043		47.5842	-43.043		47.5761	-40.46		47.568	-34.235		47.6011	-36.926
47.6182	-37.291		47.6262	-40.559		47.6102	-41.953		47.6259	-43.027		47.6259	-43.027		47.6178	-40.447		47.6097	-34.229		47.6427	-36.917
47.6598	-37.282		47.6679	-40.545		47.6519	-41.946		47.6676	-43.011		47.6676	-43.011		47.6594	-40.434		47.6513	-34.223		47.6844	-36.908
47.7015	-37.273		47.7095	-40.531		47.6935	-41.937		47.7093	-42.993		47.7093	-42.993		47.7011	-40.42		47.693	-34.217		47.7261	-36.9
47.7432	-37.263		47.7512	-40.518		47.7352	-41.928		47.7509	-42.973		47.7509	-42.973		47.7428	-40.405		47.7347	-34.211		47.7677	-36.891
47.7848	-37.254		47.7929	-40.505		47.7769	-41.918		47.7926	-42.954		47.7926	-42.954		47.7844	-40.39		47.7763	-34.205		47.8094	-36.882
47.8265	-37.246		47.8345	-40.489		47.8185	-41.908		47.8343	-42.936		47.8343	-42.936		47.8261	-40.373		47.818	-34.199		47.8511	-36.874
47.8682	-37.238		47.8762	-40.47		47.8602	-41.896		47.8759	-42.918		47.8759	-42.918		47.8678	-40.358		47.8597	-34.193		47.8927	-36.865
47.9098	-37.23		47.9179	-40.451		47.9019	-41.885		47.9176	-42.9		47.9176	-42.9		47.9094	-40.343		47.9013	-34.187		47.9344	-36.856
47.9515	-37.223		47.9595	-40.435		47.9436	-41.872		47.9593	-42.881		47.9593	-42.881		47.9511	-40.328		47.943	-34.182		47.9761	-36.847
47.9932	-37.214		48.0012	-40.421		47.9852	-41.86		48.0009	-42.862		48.0009	-42.862		47.9928	-40.314		47.9847	-34.175		48.0177	-36.838
48.0348	-37.206		48.0429	-40.408		48.0269	-41.847		48.0426	-42.842		48.0426	-42.842		48.0344	-40.3		48.0263	-34.169		48.0594	-36.827
48.0765	-37.197		48.0845	-40.396		48.0685	-41.834		48.0843	-42.82		48.0843	-42.82		48.0761	-40.284		48.068	-34.163		48.1011	-36.815
48.1182	-37.187		48.1262	-40.381		48.1102	-41.822		48.1259	-42.798		48.1259	-42.798		48.1178	-40.268		48.1097	-34.156		48.1427	-36.804
48.1598	-37.177		48.1679	-40.364		48.1519	-41.807		48.1676	-42.777		48.1676	-42.777		48.1594	-40.251		48.1513	-34.149		48.1844	-36.793
48.2015	-37.167		48.2095	-40.346		48.1935	-41.79		48.2092	-42.756		48.2092	-42.756		48.2011	-40.234		48.193	-34.142		48.2261	-36.783
48.2432	-37.157		48.2512	-40.33		48.2352	-41.772		48.2509	-42.735		48.2509	-42.735		48.2428	-40.216		48.2347	-34.135		48.2677	-36.772
48.2848	-37.148		48.2929	-40.313		48.2769	-41.753		48.2926	-42.714		48.2926	-42.714		48.2844	-40.199		48.2763	-34.128		48.3094	-36.762
48.3265	-37.138		48.3345	-40.294		48.3185	-41.735		48.3342	-42.691		48.3342	-42.691		48.3261	-40.182		48.318	-34.121		48.3511	-36.752
48.3682	-37.128		48.3762	-40.276		48.3602	-41.717		48.3759	-42.668		48.3759	-42.668		48.3678	-40.166		48.3597	-34.114		48.3927	-36.741
48.4098	-37.118		48.4179	-40.258		48.4019	-41.699		48.4176	-42.644		48.4176	-42.644		48.4094	-40.149		48.4013	-34.107		48.4344	-36.73
48.4515	-37.107		48.4595	-40.241		48.4435	-41.68		48.4592	-42.619		48.4592	-42.619		48.4511	-40.131		48.443	-34.099		48.4761	-36.718
48.4932	-37.096		48.5012	-40.223		48.4852	-41.661		48.5009	-42.595		48.5009	-42.595		48.4928	-40.111		48.4847	-34.091		48.5177	-36.706
48.5348	-37.084		48.5429	-40.204		48.5269	-41.638		48.5426	-42.571		48.5426	-42.571		48.5344	-40.091		48.5263	-34.082		48.5594	-36.693
48.5765	-37.071		48.5845	-40.179		48.5685	-41.611		48.5843	-42.546		48.5843	-42.546		48.5761	-40.07		48.568	-34.073		48.6011	-36.68
48.6182	-37.059		48.6262	-40.152		48.6102	-41.586		48.6259	-42.52		48.6259	-42.52		48.6177	-40.05		48.6097	-34.064		48.6427	-36.667
48.6598	-37.047		48.6679	-40.128		48.6519	-41.562		48.6676	-42.492		48.6676	-42.492		48.6594	-40.029		48.6513	-34.055		48.6844	-36.654
48.7015	-37.035		48.7095	-40.109		48.6935	-41.539		48.7093	-42.463		48.7093	-42.463		48.7011	-40.009		48.693	-34.045		48.7261	-36.641
48.7431	-37.025		48.7512	-40.091		48.7352	-41.517		48.7509	-42.435		48.7509	-42.435		48.7427	-39.989		48.7347	-34.036		48.7677	-36.629
48.7848	-37.014		48.7929	-40.07		48.7769	-41.492		48.7926	-42.407		48.7926	-42.407		48.7844	-39.967		48.7763	-34.027		48.8094	-36.615
48.8265	-37.001		48.8345	-40.048		48.8185	-41.465		48.8342	-42.379		48.8342	-42.379		48.8261	-39.944		48.818	-34.018		48.8511	-36.601
48.8681	-36.988		48.8762	-40.021		48.8602	-41.439		48.8759	-42.35		48.8759	-42.35		48.8677	-39.92		48.8597	-34.009		48.8927	-36.586
48.9098	-36.975		48.9179	-39.992		48.9019	-41.412		48.9176	-42.319		48.9176	-42.319		48.9094	-39.895		48.9013	-33.999		48.9344	-36.57
48.9515	-36.962		48.9595	-39.968		48.9435	-41.384		48.9592	-42.288		48.9592	-42.288		48.9511	-39.871		48.943	-33.988		48.9761	-36.554
48.9931	-36.948		49.0012	-39.945		48.9852	-41.356		49.0009	-42.255		49.0009	-42.255		48.9928	-39.848		48.9847	-33.977		49.0177	-36.538
49.0348	-36.935		49.0429	-39.923		49.0269	-41.325		49.0426	-42.222		49.0426	-42.222		49.0344	-39.823		49.0263	-33.966		49.0594	-36.523
49.0765	-36.922		49.0845	-39.894		49.0685	-41.287		49.0842	-42.189		49.0842	-42.189		49.0761	-39.797		49.068	-33.954		49.1011	-36.508
49.1181	-36.909		49.1262	-39.865		49.1102	-41.249		49.1259	-42.156		49.1259	-42.156		49.1178	-39.77		49.1097	-33.942		49.1427	-36.492
49.1598	-36.896		49.1679	-39.836		49.1519	-41.215		49.1676	-42.122		49.1676	-42.122		49.1594	-39.743		49.1513	-33.93		49.1844	-36.477
49.2015	-36.883		49.2095	-39.806		49.1935	-41.183		49.2092	-42.084		49.2092	-42.084		49.2011	-39.715		49.193	-33.918		49.2261	-36.46
49.2431	-36.869		49.2512	-39.773		49.2352	-41.148		49.2509	-42.047		49.2509	-42.047		49.2428	-39.687		49.2347	-33.905		49.2677	-36.443
49.2848	-36.854		49.2929	-39.735		49.2769	-41.11		49.2926	-42.009		49.2926	-42.009		49.2844	-39.659		49.2763	-33.891		49.3094	-36.424
49.3265	-36.838		49.3345	-39.674		49.3185	-41.065		49.3342	-41.971		49.3342	-41.971		49.3261	-39.63		49.318	-33.877		49.3511	-36.407
49.3681	-36.821		49.3762	-39.613		49.3602	-41.018		49.3759	-41.932		49.3759	-41.932		49.3678	-39.601		49.3597	-33.861		49.3927	-36.389
49.4098	-36.803		49.4179	-39.573		49.4019	-40.973		49.4176	-41.889		49.4176	-41.889		49.4094	-39.57		49.4013	-33.845		49.4344	-36.37
49.4515	-36.786		49.4595	-39.545		49.4435	-40.93		49.4592	-41.845		49.4592	-41.845		49.4511	-39.537		49.443	-33.829		49.4761	-36.352
49.4931	-36.771		49.5012	-39.521		49.4852	-40.884		49.5009	-41.802		49.5009	-41.802		49.4928	-39.505		49.4847	-33.813		49.5177	-36.332
49.5348	-36.755		49.5429	-39.498		49.5269	-40.836		49.5426	-41.758		49.5426	-41.758		49.5344	-39.472		49.5263	-33.796		49.5594	-36.312
49.5765	-36.738		49.5845	-39.475		49.5685	-40.785		49.5842	-41.712		49.5842	-41.712		49.5761	-39.438		49.568	-33.78		49.6011	-36.29
49.6181	-36.718		49.6262	-39.445		49.6102	-40.734		49.6259	-41.663		49.6259	-41.663		49.6177	-39.403		49.6097	-33.763		49.6427	-36.268
49.6598	-36.697		49.6679	-39.408		49.6519	-40.683		49.6676	-41.612		49.6676	-41.612		49.6594	-39.366		49.6513	-33.745		49.6844	-36.247
49.7015	-36.676		49.7095	-39.366		49.6935	-40.63		49.7092	-41.561		49.7092	-41.561		49.7011	-39.327		49.693	-33.726		49.7261	-36.225
49.7431	-36.655		49.7512	-39.318		49.7352	-40.572		49.7509	-41.511		49.7509	-41.511		49.7427	-39.289		49.7347	-33.707		49.7677	-36.204
49.7848	-36.633		49.7929	-39.271		49.7769	-40.511		49.7926	-41.459		49.7926	-41.459		49.7844	-39.251		49.7763	-33.688		49.8094	-36.183
49.8265	-36.613		49.8345	-39.226		49.8185	-40.448		49.8342	-41.405		49.8342	-41.405		49.8261	-39.213		49.818	-33.669		49.8511	-36.161
49.8681	-36.591		49.8762	-39.181		49.8602	-40.384		49.8759	-41.348		49.8759	-41.348		49.8677	-39.171		49.8597	-33.649		49.8927	-36.138
49.9098	-36.568		49.9179	-39.133		49.9019	-40.317		49.9176	-41.292		49.9176	-41.292		49.9094	-39.127		49.9013	-33.629		49.9344	-36.113
49.9515	-36.543		49.9595	-39.078		49.9435	-40.247		49.9592	-41.234		49.9592	-41.234		49.9511	-39.084		49.943	-33.608		49.9761	-36.087
49.9931	-36.516		50.0012	-39.026		49.9852	-40.174		50.0009	-41.173		50.0009	-41.173		49.9927	-39.039		49.9847	-33.587		50.0177	-36.06
50.0348	-36.488		50.0429	-38.973		50.0269	-40.098		50.0426	-41.112		50.0426	-41.112		50.0344	-38.994		50.0263	-33.563		50.0594	-36.034
50.0765	-36.461		50.0845	-38.912		50.0685	-40.022		50.0842	-41.049		50.0842	-41.049		50.0761	-38.948		50.068	-33.539		50.1011	-36.008
50.1181	-36.433		50.1262	-38.849		50.1102	-39.947		50.1259	-40.986		50.1259	-40.986		50.1177	-38.898		50.1097	-33.513		50.1427	-35.979
50.1598	-36.405		50.1679	-38.786		50.1519	-39.867		50.1676	-40.919		50.1676	-40.919		50.1594	-38.849		50.1513	-33.486		50.1844	-35.95
50.2015	-36.377		50.2095	-38.72		50.1935	-39.782		50.2092	-40.851		50.2092	-40.851		50.2011	-38.799		50.193	-33.46		50.2261	-35.919
50.2431	-36.349		50.2512	-38.652		50.2352	-39.699		50.2509	-40.782		50.2509	-40.782		50.2427	-38.749		50.2347	-33.431		50.2677	-35.887
50.2848	-36.318		50.2929	-38.585		50.2769	-39.614		50.2926	-40.713		50.2926	-40.713		50.2844	-38.696		50.2763	-33.401		50.3094	-35.854
50.3265	-36.286		50.3345	-38.517		50.3185	-39.521		50.3342	-40.638		50.3342	-40.638		50.3261	-38.643		50.318	-33.369		50.3511	-35.82
50.3681	-36.253		50.3762	-38.444		50.3602	-39.427		50.3759	-40.564		50.3759	-40.564		50.3677	-38.591		50.3597	-33.338		50.3927	-35.785
50.4098	-36.22		50.4179	-38.364		50.4019	-39.328		50.4176	-40.491		50.4176	-40.491		50.4094	-38.538		50.4013	-33.305		50.4344	-35.748
50.4515	-36.187		50.4595	-38.287		50.4435	-39.225		50.4592	-40.414		50.4592	-40.414		50.4511	-38.482		50.443	-33.271		50.4761	-35.71
50.4931	-36.153		50.5012	-38.209		50.4852	-39.122		50.5009	-40.336		50.5009	-40.336		50.4927	-38.423		50.4847	-33.237		50.5177	-35.67
50.5348	-36.116		50.5429	-38.122		50.5269	-39.019		50.5509	-40.241		50.5509	-40.241		50.5344	-38.365		50.5263	-33.201		50.5594	-35.629
50.5765	-36.077		50.5845	-38.033		50.5685	-38.903		50.5926	-40.161		50.5926	-40.161		50.5761	-38.308		50.568	-33.161		50.6011	-35.588
50.6181	-36.037		50.6262	-37.944		50.6102	-38.784		50.6342	-40.078		50.6342	-40.078		50.6177	-38.248		50.6097	-33.12		50.6427	-35.545
50.6598	-35.997		50.6679	-37.851		50.6519	-38.668		50.6759	-39.995		50.6759	-39.995		50.6594	-38.185		50.6513	-33.08		50.6844	-35.499
50.7015	-35.954		50.7095	-37.756		50.6935	-38.553		50.7176	-39.912		50.7176	-39.912		50.7011	-38.123		50.693	-33.039		50.7261	-35.451
50.7431	-35.909		50.7512	-37.661		50.7352	-38.436		50.7592	-39.826		50.7592	-39.826		50.7427	-38.062		50.7347	-32.995		50.7677	-35.404
50.7848	-35.863		50.7929	-37.561		50.7769	-38.318		50.8009	-39.737		50.8009	-39.737		50.7844	-38.001		50.7763	-32.951		50.8094	-35.356
50.8265	-35.816		50.8345	-37.462		50.8185	-38.199		50.8426	-39.65		50.8426	-39.65		50.8261	-37.938		50.818	-32.906		50.8511	-35.305
50.8681	-35.768		50.8762	-37.361		50.8602	-38.073		50.8842	-39.559		50.8842	-39.559		50.8677	-37.874		50.8596	-32.858		50.8927	-35.253
50.9098	-35.716		50.9178	-37.255		50.9019	-37.945		50.9259	-39.469		50.9259	-39.469		50.9094	-37.809		50.9013	-32.809		50.9344	-35.199
50.9515	-35.662		50.9595	-37.151		50.9435	-37.82		50.9676	-39.378		50.9676	-39.378		50.9511	-37.744		50.943	-32.759		50.9761	-35.144
50.9931	-35.609		51.0012	-37.039		50.9852	-37.688		51.0092	-39.285		51.0092	-39.285		50.9927	-37.679		50.9846	-32.706		51.0178	-35.087
51.0348	-35.555		51.0428	-36.926		51.0269	-37.557		51.0509	-39.19		51.0509	-39.19		51.0344	-37.613		51.0263	-32.652		51.0594	-35.026
51.0765	-35.502		51.0845	-36.811		51.0685	-37.422		51.0926	-39.096		51.0926	-39.096		51.0761	-37.547		51.068	-32.599		51.1011	-34.966
51.1181	-35.446		51.1262	-36.692		51.1102	-37.283		51.1342	-38.999		51.1342	-38.999		51.1177	-37.482		51.1096	-32.544		51.1427	-34.907
51.1598	-35.389		51.1678	-36.567		51.1519	-37.136		51.1759	-38.9		51.1759	-38.9		51.1594	-37.416		51.1513	-32.487		51.1844	-34.845
51.2015	-35.333		51.2095	-36.442		51.1935	-36.987		51.2176	-38.803		51.2176	-38.803		51.2011	-37.347		51.193	-32.429		51.2261	-34.781
51.2431	-35.276		51.2512	-36.318		51.2352	-36.834		51.2592	-38.703		51.2592	-38.703		51.2427	-37.279		51.2347	-32.369		51.2677	-34.716
51.2848	-35.215		51.2928	-36.196		51.2769	-36.697		51.3009	-38.601		51.3009	-38.601		51.2844	-37.212		51.2763	-32.308		51.3094	-34.651
51.3265	-35.15		51.3345	-36.073		51.3252	-36.553		51.3426	-38.503		51.3426	-38.503		51.3261	-37.143		51.318	-32.245		51.3511	-34.586
51.3681	-35.087		51.3762	-35.958		51.3668	-36.419		51.3842	-38.404		51.3842	-38.404		51.3677	-37.074		51.3596	-32.18		51.3927	-34.517
51.4098	-35.021		51.4178	-35.839		51.4085	-36.283		51.4259	-38.303		51.4259	-38.303		51.4094	-37.004		51.4013	-32.114		51.4344	-34.448
51.4515	-34.953		51.4595	-35.716		51.4502	-36.144		51.4676	-38.203		51.4676	-38.203		51.4511	-36.934		51.443	-32.049		51.4761	-34.376
51.4931	-34.884		51.5012	-35.592		51.4918	-36.003		51.5092	-38.102		51.5092	-38.102		51.4927	-36.86		51.4846	-31.983		51.5177	-34.303
51.5348	-34.817		51.5428	-35.461		51.5335	-35.857		51.5509	-37.999		51.5509	-37.999		51.5344	-36.786		51.5263	-31.913		51.5594	-34.23
51.5765	-34.749		51.5845	-35.337		51.5752	-35.715		51.5926	-37.896		51.5926	-37.896		51.5761	-36.715		51.568	-31.843		51.6011	-34.155
51.6181	-34.679		51.6262	-35.208		51.6168	-35.575		51.6342	-37.792		51.6342	-37.792		51.6177	-36.642		51.6096	-31.774		51.6427	-34.08
51.6598	-34.605		51.6678	-35.075		51.6585	-35.438		51.6759	-37.692		51.6759	-37.692		51.6594	-36.567		51.6513	-31.701		51.6844	-34.003
51.7015	-34.534		51.7095	-34.946		51.7002	-35.3		51.7176	-37.595		51.7176	-37.595		51.7011	-36.495		51.693	-31.628		51.7261	-33.924
51.7431	-34.463		51.7512	-34.81		51.7418	-35.158		51.7592	-37.493		51.7592	-37.493		51.7427	-36.423		51.7346	-31.555		51.7677	-33.846
51.7848	-34.39		51.7928	-34.687		51.7835	-35.025		51.8009	-37.393		51.8009	-37.393		51.7844	-36.352		51.7763	-31.481		51.8094	-33.769
51.8265	-34.317		51.8345	-34.568		51.8252	-34.892		51.8426	-37.294		51.8426	-37.294		51.8261	-36.278		51.818	-31.403		51.8511	-33.69
51.8681	-34.244		51.8762	-34.452		51.8668	-34.767		51.8842	-37.192		51.8842	-37.192		51.8677	-36.203		51.8596	-31.329		51.8927	-33.611
51.9098	-34.167		51.9178	-34.337		51.9085	-34.648		51.9259	-37.092		51.9259	-37.092		51.9094	-36.127		51.9013	-31.254		51.9344	-33.533
51.9515	-34.091		51.9595	-34.223		51.9502	-34.526		51.9675	-36.996		51.9675	-36.996		51.9511	-36.05		51.943	-31.178		51.9761	-33.451
51.9931	-34.017		52.0012	-34.11		51.9918	-34.413		52.0092	-36.897		52.0092	-36.897		51.9927	-35.975		51.9846	-31.101		52.0177	-33.369
52.0348	-33.942		52.0428	-33.999		52.0335	-34.298		52.0509	-36.801		52.0509	-36.801		52.0344	-35.899		52.0263	-31.023		52.0594	-33.291
52.0765	-33.865		52.0845	-33.891		52.0752	-34.186		52.0925	-36.706		52.0925	-36.706		52.0761	-35.824		52.068	-30.946		52.1011	-33.212
52.1181	-33.789		52.1262	-33.79		52.1168	-34.011		52.1342	-36.609		52.1342	-36.609		52.1177	-35.744		52.1096	-30.868		52.1427	-33.131
52.1598	-33.715		52.1678	-33.691		52.1585	-33.841		52.1759	-36.514		52.1759	-36.514		52.1594	-35.668		52.1513	-30.791		52.1844	-33.051
52.2015	-33.639		52.2095	-33.595		52.2002	-33.741		52.2176	-36.422		52.2176	-36.422		52.2011	-35.593		52.193	-30.714		52.2261	-32.975
52.2431	-33.56		52.2512	-33.501		52.2418	-33.667		52.2592	-36.329		52.2592	-36.329		52.2427	-35.516		52.2346	-30.636		52.2677	-32.899
52.2848	-33.484		52.2928	-33.413		52.2835	-33.606		52.3009	-36.238		52.3009	-36.238		52.2844	-35.437		52.2763	-30.556		52.3094	-32.824
52.3265	-33.412		52.3345	-33.328		52.3252	-33.544		52.3426	-36.151		52.3426	-36.151		52.3261	-35.362		52.318	-30.479		52.3511	-32.751
52.3681	-33.336		52.3762	-33.245		52.3668	-33.485		52.3842	-36.065		52.3842	-36.065		52.3677	-35.288		52.3596	-30.404		52.3927	-32.681
52.4098	-33.26		52.4178	-33.168		52.4085	-33.424		52.4259	-35.979		52.4259	-35.979		52.4094	-35.211		52.4013	-30.332		52.4344	-32.611
52.4515	-33.183		52.4595	-33.1		52.4502	-33.354		52.4676	-35.895		52.4676	-35.895		52.4511	-35.134		52.443	-30.257		52.4761	-32.542
52.4931	-33.109		52.5012	-33.03		52.4918	-33.278		52.5092	-35.815		52.5092	-35.815		52.4927	-35.061		52.4846	-30.183		52.5177	-32.474
52.5348	-33.035		52.5428	-32.959		52.5335	-33.208		52.5509	-35.733		52.5509	-35.733		52.5344	-34.988		52.5263	-30.11		52.5594	-32.411
52.5765	-32.964		52.5845	-32.89		52.5752	-33.148		52.5926	-35.655		52.5926	-35.655		52.5761	-34.914		52.568	-30.037		52.6011	-32.348
52.6181	-32.896		52.6262	-32.826		52.6168	-33.094		52.6342	-35.581		52.6342	-35.581		52.6177	-34.842		52.6096	-29.963		52.6427	-32.287
52.6598	-32.832		52.6678	-32.759		52.6585	-33.04		52.6759	-35.509		52.6759	-35.509		52.6594	-34.77		52.6513	-29.891		52.6844	-32.23
52.7014	-32.772		52.7095	-32.694		52.7002	-32.993		52.7176	-35.438		52.7176	-35.438		52.7011	-34.699		52.693	-29.821		52.7261	-32.174
52.7431	-32.712		52.7512	-32.635		52.7419	-32.945		52.7592	-35.367		52.7592	-35.367		52.7427	-34.626		52.7346	-29.753		52.7677	-32.119
52.7848	-32.651		52.7928	-32.582		52.7835	-32.901		52.8009	-35.299		52.8009	-35.299		52.7844	-34.556		52.7763	-29.686		52.8094	-32.067
52.8265	-32.592		52.8345	-32.535		52.8252	-32.856		52.8426	-35.235		52.8426	-35.235		52.8261	-34.486		52.818	-29.619		52.8511	-32.014
52.8681	-32.532		52.8762	-32.491		52.8669	-32.81		52.8842	-35.172		52.8842	-35.172		52.8677	-34.419		52.8596	-29.555		52.8927	-31.967
52.9098	-32.471		52.9178	-32.444		52.9085	-32.762		52.9259	-35.109		52.9259	-35.109		52.9094	-34.351		52.9013	-29.492		52.9344	-31.922
52.9515	-32.413		52.9595	-32.395		52.9502	-32.704		52.9676	-35.045		52.9676	-35.045		52.9511	-34.286		52.943	-29.43		52.9761	-31.881
52.9931	-32.355		53.0012	-32.348		52.9919	-32.638		53.0092	-34.987		53.0092	-34.987		52.9927	-34.223		52.9846	-29.37		53.0177	-31.84
53.0348	-32.302		53.0428	-32.298		53.0335	-32.581		53.0509	-34.929		53.0509	-34.929		53.0344	-34.159		53.0263	-29.311		53.0594	-31.8
53.0765	-32.247		53.0845	-32.246		53.0752	-32.531		53.0926	-34.87		53.0926	-34.87		53.0761	-34.096		53.068	-29.252		53.1011	-31.761
53.1181	-32.191		53.1262	-32.192		53.1169	-32.485		53.1342	-34.812		53.1342	-34.812		53.1177	-34.033		53.1096	-29.195		53.1427	-31.722
53.1598	-32.136		53.1678	-32.139		53.1585	-32.441		53.1759	-34.756		53.1759	-34.756		53.1594	-33.972		53.1513	-29.138		53.1844	-31.687
53.2015	-32.083		53.2095	-32.086		53.2002	-32.394		53.2176	-34.703		53.2176	-34.703		53.2011	-33.913		53.193	-29.083		53.2261	-31.654
53.2431	-32.034		53.2512	-32.024		53.2418	-32.345		53.2592	-34.651		53.2592	-34.651		53.2427	-33.855		53.2346	-29.027		53.2678	-31.623
53.2848	-31.983		53.2928	-31.958		53.2835	-32.291		53.3009	-34.596		53.3009	-34.596		53.2844	-33.795		53.2763	-28.972		53.3094	-31.593
53.3265	-31.932		53.3345	-31.888		53.3252	-32.235		53.3426	-34.543		53.3426	-34.543		53.3261	-33.738		53.318	-28.917		53.3511	-31.562
53.3681	-31.884		53.3762	-31.818		53.3668	-32.171		53.3842	-34.491		53.3842	-34.491		53.3677	-33.682		53.3596	-28.862		53.3928	-31.532
53.4098	-31.836		53.4178	-31.749		53.4085	-32.097		53.4259	-34.442		53.4259	-34.442		53.4094	-33.626		53.4013	-28.811		53.4344	-31.501
53.4515	-31.791		53.4595	-31.675		53.4502	-32.02		53.4676	-34.392		53.4676	-34.392		53.4511	-33.57		53.443	-28.759		53.4761	-31.472
53.4931	-31.745		53.5012	-31.596		53.4918	-31.949		53.5092	-34.341		53.5092	-34.341		53.4927	-33.516		53.4913	-28.699		53.5178	-31.442
53.5348	-31.699		53.5428	-31.515		53.5335	-31.881		53.5509	-34.289		53.5509	-34.289		53.5344	-33.465		53.533	-28.648		53.5594	-31.412
53.5764	-31.655		53.5845	-31.433		53.5752	-31.809		53.5926	-34.239		53.5926	-34.239		53.5761	-33.415		53.5746	-28.597		53.6011	-31.381
53.6181	-31.611		53.6262	-31.35		53.6168	-31.732		53.6342	-34.192		53.6342	-34.192		53.6177	-33.367		53.6163	-28.545		53.6428	-31.348
53.6598	-31.566		53.6678	-31.263		53.6585	-31.645		53.6759	-34.142		53.6759	-34.142		53.6594	-33.317		53.658	-28.492		53.6844	-31.316
53.7015	-31.522		53.7095	-31.174		53.7002	-31.557		53.7176	-34.09		53.7176	-34.09		53.7011	-33.268		53.6996	-28.44		53.7261	-31.283
53.7431	-31.48		53.7512	-31.088		53.7418	-31.476		53.7592	-34.04		53.7592	-34.04		53.7427	-33.223		53.7413	-28.386		53.7678	-31.251
53.7848	-31.439		53.7928	-30.991		53.7835	-31.396		53.8009	-33.989		53.8009	-33.989		53.7844	-33.178		53.783	-28.333		53.8094	-31.219
53.8265	-31.4		53.8345	-30.887		53.8252	-31.317		53.8426	-33.941		53.8426	-33.941		53.8261	-33.135		53.8246	-28.28		53.8511	-31.185
53.8681	-31.361		53.8762	-30.782		53.8668	-31.237		53.8842	-33.891		53.8842	-33.891		53.8677	-33.09		53.8663	-28.227		53.8928	-31.148
53.9098	-31.325		53.9178	-30.684		53.9085	-31.16		53.9259	-33.841		53.9259	-33.841		53.9094	-33.045		53.908	-28.174		53.9344	-31.109
53.9515	-31.288		53.9595	-30.585		53.9502	-31.082		53.9676	-33.792		53.9676	-33.792		53.9511	-33.002		53.9496	-28.12		53.9761	-31.07
53.9931	-31.249		54.0012	-30.486		53.9918	-31.004		54.0092	-33.744		54.0092	-33.744		53.9927	-32.961		53.9913	-28.068		54.0178	-31.029
54.0348	-31.212		54.0428	-30.394		54.0335	-30.927		54.0509	-33.699		54.0509	-33.699		54.0344	-32.921		54.033	-28.016		54.0594	-30.986
54.0765	-31.176		54.0845	-30.304		54.0752	-30.853		54.0925	-33.653		54.0925	-33.653		54.0761	-32.88		54.0746	-27.961		54.1011	-30.941
54.1181	-31.138		54.1262	-30.215		54.1168	-30.78		54.1342	-33.607		54.1342	-33.607		54.1177	-32.839		54.1163	-27.908		54.1428	-30.894
54.1598	-31.101		54.1678	-30.129		54.1585	-30.709		54.1759	-33.562		54.1759	-33.562		54.1594	-32.8		54.158	-27.856		54.1844	-30.847
54.2015	-31.061		54.2095	-30.05		54.2002	-30.643		54.2176	-33.519		54.2176	-33.519		54.2011	-32.763		54.1996	-27.805		54.2261	-30.799
54.2431	-31.019		54.2512	-29.97		54.2418	-30.579		54.2592	-33.479		54.2592	-33.479		54.2427	-32.728		54.2413	-27.753		54.2678	-30.75
54.2848	-30.976		54.2928	-29.89		54.2835	-30.52		54.3009	-33.439		54.3009	-33.439		54.2844	-32.693		54.283	-27.7		54.3094	-30.698
54.3265	-30.933		54.3345	-29.814		54.3252	-30.465		54.3426	-33.398		54.3426	-33.398		54.3261	-32.658		54.3246	-27.649		54.3511	-30.643
54.3681	-30.891		54.3762	-29.735		54.3668	-30.409		54.3842	-33.357		54.3842	-33.357		54.3677	-32.622		54.3663	-27.599		54.3928	-30.59
54.4098	-30.848		54.4178	-29.653		54.4085	-30.357		54.4259	-33.318		54.4259	-33.318		54.4094	-32.587		54.408	-27.549		54.4344	-30.534
54.4515	-30.802		54.4595	-29.58		54.4502	-30.311		54.4676	-33.282		54.4676	-33.282		54.4511	-32.554		54.4496	-27.5		54.4761	-30.474
54.4931	-30.757		54.5011	-29.515		54.4918	-30.268		54.5092	-33.247		54.5092	-33.247		54.4927	-32.522		54.4913	-27.45		54.5178	-30.412
54.5348	-30.712		54.5495	-29.442		54.5335	-30.236		54.5509	-33.214		54.5509	-33.214		54.5344	-32.492		54.533	-27.399		54.5594	-30.354
54.5765	-30.666		54.5911	-29.381		54.5752	-30.208		54.5926	-33.182		54.5926	-33.182		54.5761	-32.463		54.5746	-27.351		54.6011	-30.291
54.6181	-30.62		54.6328	-29.326		54.6168	-30.184		54.6342	-33.153		54.6342	-33.153		54.6177	-32.435		54.6163	-27.306		54.6428	-30.226
54.6598	-30.572		54.6745	-29.26		54.6585	-30.165		54.6759	-33.125		54.6759	-33.125		54.6594	-32.407		54.658	-27.261		54.6845	-30.159
54.7014	-30.523		54.7161	-29.196		54.7002	-30.148		54.7176	-33.1		54.7176	-33.1		54.7011	-32.381		54.6996	-27.215		54.7261	-30.093
54.7431	-30.476		54.7578	-29.145		54.7418	-30.134		54.7592	-33.078		54.7592	-33.078		54.7427	-32.358		54.7413	-27.17		54.7678	-30.026
54.7848	-30.432		54.7995	-29.103		54.7835	-30.121		54.8009	-33.058		54.8009	-33.058		54.7844	-32.335		54.783	-27.129		54.8095	-29.958
54.8264	-30.387		54.8411	-29.07		54.8252	-30.111		54.8426	-33.041		54.8426	-33.041		54.8261	-32.314		54.8246	-27.088		54.8511	-29.89
54.8681	-30.342		54.8828	-29.042		54.8668	-30.103		54.8842	-33.024		54.8842	-33.024		54.8677	-32.295		54.8663	-27.051		54.8928	-29.824
54.9098	-30.297		54.9245	-29.014		54.9085	-30.096		54.9259	-33.009		54.9259	-33.009		54.9094	-32.276		54.908	-27.014		54.9345	-29.76
54.9514	-30.254		54.9661	-28.987		54.9502	-30.087		54.9675	-32.996		54.9675	-32.996		54.9511	-32.259		54.9496	-26.977		54.9761	-29.694
54.9931	-30.213		55.0078	-28.959		54.9918	-30.079		55.0092	-32.985		55.0092	-32.985		54.9927	-32.243		54.9913	-26.941		55.0178	-29.627
55.0348	-30.173		55.0495	-28.931		55.0335	-30.075		55.0509	-32.976		55.0509	-32.976		55.0344	-32.226		55.033	-26.908		55.0595	-29.562
55.0764	-30.132		55.0911	-28.909		55.0752	-30.074		55.0926	-32.968		55.0926	-32.968		55.0761	-32.211		55.0746	-26.877		55.1011	-29.497
55.1181	-30.09		55.1328	-28.892		55.1168	-30.074		55.1342	-32.962		55.1342	-32.962		55.1177	-32.197		55.1163	-26.847		55.1428	-29.431
55.1598	-30.05		55.1745	-28.879		55.1585	-30.074		55.1759	-32.959		55.1759	-32.959		55.1594	-32.186		55.158	-26.822		55.1845	-29.367
55.2014	-30.013		55.2161	-28.868		55.2002	-30.074		55.2176	-32.957		55.2176	-32.957		55.2011	-32.176		55.1996	-26.798		55.2261	-29.308
55.2431	-29.978		55.2578	-28.86		55.2418	-30.075		55.2592	-32.956		55.2592	-32.956		55.2427	-32.168		55.2413	-26.777		55.2678	-29.251
55.2914	-29.94		55.2995	-28.857		55.2835	-30.075		55.3009	-32.955		55.3009	-32.955		55.2844	-32.161		55.283	-26.758		55.3095	-29.196
55.3331	-29.908		55.3411	-28.856		55.3252	-30.076		55.3426	-32.956		55.3426	-32.956		55.3261	-32.155		55.3246	-26.74		55.3511	-29.143
55.3748	-29.879		55.3828	-28.856		55.3668	-30.08		55.3842	-32.956		55.3842	-32.956		55.3677	-32.15		55.3663	-26.724		55.3928	-29.092
55.4164	-29.852		55.4245	-28.857		55.4085	-30.089		55.4259	-32.956		55.4259	-32.956		55.4161	-32.144		55.408	-26.712		55.4428	-29.035
55.4581	-29.829		55.4661	-28.857		55.4502	-30.106		55.4676	-32.956		55.4676	-32.956		55.4577	-32.141		55.4496	-26.702		55.4911	-28.985
55.4998	-29.809		55.5078	-28.858		55.4918	-30.136		55.5092	-32.956		55.5092	-32.956		55.4994	-32.138		55.4913	-26.694		55.5328	-28.944
55.5414	-29.792		55.5495	-28.858		55.5335	-30.175		55.5509	-32.957		55.5509	-32.957		55.541	-32.137		55.533	-26.688		55.5745	-28.906
55.5831	-29.778		55.5911	-28.862		55.5752	-30.226		55.5926	-32.959		55.5926	-32.959		55.5827	-32.136		55.5746	-26.683		55.6161	-28.871
55.6248	-29.768		55.6328	-28.871		55.6168	-30.292		55.6342	-32.964		55.6342	-32.964		55.6244	-32.135		55.6163	-26.68		55.6578	-28.841
55.6664	-29.76		55.6745	-28.889		55.6585	-30.371		55.6759	-32.973		55.6759	-32.973		55.6661	-32.135		55.658	-26.678		55.6995	-28.815
55.7081	-29.754		55.7161	-28.922		55.7002	-30.459		55.7176	-32.988		55.7176	-32.988		55.7077	-32.135		55.6996	-26.677		55.7411	-28.792
55.7498	-29.75		55.7578	-28.968		55.7418	-30.547		55.7592	-33.012		55.7592	-33.012		55.7494	-32.135		55.7413	-26.677		55.7828	-28.774
55.7914	-29.746		55.7995	-29.024		55.7835	-30.637		55.8009	-33.044		55.8009	-33.044		55.7911	-32.135		55.783	-26.678		55.8245	-28.758
55.8331	-29.744		55.8411	-29.093		55.8252	-30.726		55.8426	-33.084		55.8426	-33.084		55.8327	-32.136		55.8246	-26.678		55.8661	-28.745
55.8748	-29.743		55.8828	-29.174		55.8668	-30.819		55.8842	-33.134		55.8842	-33.134		55.8744	-32.136		55.8663	-26.678		55.9078	-28.734
55.9164	-29.743		55.9245	-29.261		55.9085	-30.916		55.9259	-33.192		55.9259	-33.192		55.9161	-32.137		55.908	-26.678		55.9495	-28.726
55.9581	-29.743		55.9661	-29.356		55.9502	-31.021		55.9676	-33.257		55.9676	-33.257		55.9577	-32.139		55.9496	-26.679		55.9911	-28.72
55.9998	-29.743		56.0078	-29.463		55.9918	-31.123		56.0092	-33.328		56.0092	-33.328		55.9994	-32.144		55.9913	-26.682		56.0328	-28.716
56.0414	-29.743		56.0495	-29.574		56.0335	-31.23		56.0509	-33.404		56.0509	-33.404		56.041	-32.151		56.0329	-26.689		56.0745	-28.714
56.0831	-29.744		56.0911	-29.689		56.0752	-31.343		56.0926	-33.478		56.0926	-33.478		56.0827	-32.164		56.0746	-26.702		56.1161	-28.713
56.1248	-29.745		56.1328	-29.804		56.1168	-31.453		56.1342	-33.556		56.1342	-33.556		56.1244	-32.183		56.1163	-26.723		56.1578	-28.713
56.1664	-29.749		56.1745	-29.919		56.1585	-31.561		56.1759	-33.638		56.1759	-33.638		56.166	-32.209		56.158	-26.753		56.1995	-28.714
56.2081	-29.756		56.2161	-30.035		56.2002	-31.669		56.2176	-33.719		56.2176	-33.719		56.2077	-32.242		56.1996	-26.793		56.2411	-28.714
56.2498	-29.771		56.2578	-30.141		56.2418	-31.778		56.2592	-33.804		56.2592	-33.804		56.2494	-32.28		56.2413	-26.84		56.2828	-28.714
56.2914	-29.794		56.2995	-30.245		56.2835	-31.887		56.3009	-33.89		56.3009	-33.89		56.291	-32.327		56.2829	-26.894		56.3245	-28.715
56.3331	-29.827		56.3411	-30.349		56.3252	-31.994		56.3426	-33.974		56.3426	-33.974		56.3327	-32.38		56.3246	-26.956		56.3661	-28.717
56.3748	-29.87		56.3828	-30.461		56.3668	-32.098		56.3842	-34.06		56.3842	-34.06		56.3744	-32.439		56.3663	-27.023		56.4078	-28.72
56.4164	-29.922		56.4245	-30.575		56.4085	-32.199		56.4259	-34.146		56.4259	-34.146		56.416	-32.5		56.408	-27.094		56.4495	-28.729
56.4581	-29.98		56.4661	-30.696		56.4502	-32.311		56.4676	-34.234		56.4676	-34.234		56.4577	-32.562		56.4496	-27.166		56.4911	-28.744
56.4998	-30.044		56.5078	-30.815		56.4918	-32.425		56.5092	-34.322		56.5092	-34.322		56.4994	-32.627		56.4913	-27.241		56.5328	-28.767
56.5414	-30.112		56.5495	-30.934		56.5335	-32.537		56.5509	-34.414		56.5509	-34.414		56.541	-32.693		56.5329	-27.318		56.5745	-28.801
56.5831	-30.184		56.5911	-31.051		56.5752	-32.648		56.5992	-34.519		56.5992	-34.519		56.5827	-32.758		56.5746	-27.395		56.6161	-28.844
56.6248	-30.259		56.6328	-31.166		56.6168	-32.758		56.6409	-34.606		56.6409	-34.606		56.6244	-32.826		56.6163	-27.471		56.6578	-28.896
56.6664	-30.334		56.6745	-31.255		56.6585	-32.872		56.6825	-34.696		56.6825	-34.696		56.666	-32.894		56.6579	-27.547		56.6995	-28.954
56.7081	-30.41		56.7161	-31.317		56.7002	-32.985		56.7242	-34.787		56.7242	-34.787		56.7077	-32.965		56.6996	-27.622		56.7411	-29.018
56.7498	-30.486		56.7578	-31.406		56.7418	-33.094		56.7659	-34.884		56.7659	-34.884		56.7494	-33.037		56.7413	-27.698		56.7828	-29.083
56.7914	-30.561		56.7995	-31.527		56.7835	-33.206		56.8075	-34.98		56.8075	-34.98		56.791	-33.108		56.783	-27.773		56.8245	-29.149
56.8331	-30.633		56.8411	-31.65		56.8252	-33.319		56.8492	-35.073		56.8492	-35.073		56.8327	-33.179		56.8246	-27.847		56.8661	-29.219
56.8748	-30.705		56.8828	-31.681		56.8668	-33.431		56.8909	-35.166		56.8909	-35.166		56.8744	-33.251		56.8663	-27.92		56.9078	-29.29
56.9164	-30.777		56.9245	-31.688		56.9085	-33.539		56.9325	-35.26		56.9325	-35.26		56.916	-33.321		56.9079	-27.989		56.9495	-29.363
56.9581	-30.851		56.9661	-31.75		56.9502	-33.645		56.9742	-35.357		56.9742	-35.357		56.9577	-33.394		56.9496	-28.061		56.9911	-29.437
56.9998	-30.926		57.0078	-31.849		56.9918	-33.747		57.0159	-35.452		57.0159	-35.452		56.9994	-33.469		56.9913	-28.133		57.0328	-29.509
57.0414	-30.998		57.0495	-32.01		57.0335	-33.847		57.0575	-35.547		57.0575	-35.547		57.041	-33.544		57.0329	-28.203		57.0745	-29.582
57.0831	-31.067		57.0911	-32.177		57.0752	-33.95		57.0992	-35.64		57.0992	-35.64		57.0827	-33.622		57.0746	-28.277		57.1161	-29.653
57.1248	-31.137		57.1328	-32.352		57.1168	-34.045		57.1409	-35.731		57.1409	-35.731		57.1244	-33.698		57.1163	-28.352		57.1578	-29.722
57.1664	-31.203		57.1745	-32.516		57.1585	-34.138		57.1825	-35.827		57.1825	-35.827		57.166	-33.773		57.1579	-28.424		57.1994	-29.792
57.2081	-31.269		57.2161	-32.663		57.2002	-34.229		57.2242	-35.924		57.2242	-35.924		57.2077	-33.847		57.1996	-28.494		57.2411	-29.861
57.2498	-31.335		57.2578	-32.792		57.2418	-34.318		57.2659	-36.019		57.2659	-36.019		57.2494	-33.919		57.2413	-28.563		57.2828	-29.929
57.2914	-31.401		57.2995	-32.906		57.2835	-34.408		57.3076	-36.112		57.3076	-36.112		57.291	-33.995		57.2829	-28.629		57.3244	-29.999
57.3331	-31.466		57.3411	-33.008		57.3252	-34.498		57.3492	-36.201		57.3492	-36.201		57.3327	-34.07		57.3246	-28.695		57.3661	-30.069
57.3747	-31.533		57.3828	-33.102		57.3668	-34.587		57.3909	-36.291		57.3909	-36.291		57.3744	-34.147		57.3663	-28.76		57.4078	-30.138
57.4164	-31.601		57.4245	-33.189		57.4085	-34.673		57.4326	-36.383		57.4326	-36.383		57.416	-34.225		57.408	-28.826		57.4494	-30.205
57.4581	-31.667		57.4661	-33.272		57.4502	-34.759		57.4742	-36.473		57.4742	-36.473		57.4577	-34.302		57.4496	-28.892		57.4911	-30.27
57.4998	-31.732		57.5078	-33.351		57.4918	-34.84		57.5159	-36.564		57.5159	-36.564		57.4994	-34.377		57.4913	-28.957		57.5328	-30.334
57.5414	-31.798		57.5495	-33.427		57.5335	-34.918		57.5576	-36.652		57.5576	-36.652		57.541	-34.449		57.533	-29.023		57.5744	-30.4
57.5831	-31.863		57.5911	-33.499		57.5752	-34.996		57.5992	-36.737		57.5992	-36.737		57.5827	-34.52		57.5746	-29.087		57.6161	-30.466
57.6248	-31.925		57.6328	-33.57		57.6168	-35.074		57.6409	-36.82		57.6409	-36.82		57.6244	-34.593		57.6163	-29.149		57.6577	-30.533
57.6664	-31.986		57.6745	-33.642		57.6585	-35.152		57.6826	-36.904		57.6826	-36.904		57.666	-34.666		57.658	-29.21		57.6994	-30.599
57.7081	-32.046		57.7161	-33.711		57.7002	-35.226		57.7242	-36.988		57.7242	-36.988		57.7077	-34.739		57.6996	-29.27		57.7411	-30.664
57.7498	-32.104		57.7578	-33.779		57.7418	-35.296		57.7659	-37.073		57.7659	-37.073		57.7494	-34.815		57.7413	-29.326		57.7827	-30.729
57.7914	-32.164		57.7995	-33.845		57.7835	-35.36		57.8076	-37.156		57.8076	-37.156		57.791	-34.888		57.7829	-29.382		57.8244	-30.794
57.8331	-32.226		57.8411	-33.91		57.8252	-35.419		57.8492	-37.237		57.8492	-37.237		57.8327	-34.96		57.8246	-29.435		57.8661	-30.856
57.8748	-32.288		57.8828	-33.971		57.8668	-35.477		57.8909	-37.314		57.8909	-37.314		57.8744	-35.03		57.8663	-29.489		57.9077	-30.918
57.9164	-32.345		57.9245	-34.035		57.9085	-35.532		57.9326	-37.391		57.9326	-37.391		57.916	-35.099		57.908	-29.542		57.9494	-30.977
57.9581	-32.401		57.9661	-34.098		57.9502	-35.585		57.9742	-37.464		57.9742	-37.464		57.9577	-35.166		57.9496	-29.594		57.9911	-31.036
57.9998	-32.454		58.0078	-34.163		57.9918	-35.639		58.0159	-37.537		58.0159	-37.537		57.9994	-35.231		57.9913	-29.647		58.0327	-31.095
58.0414	-32.505		58.0495	-34.225		58.0335	-35.694		58.0576	-37.607		58.0576	-37.607		58.041	-35.298		58.0329	-29.698		58.0744	-31.151
58.0831	-32.554		58.0911	-34.29		58.0752	-35.75		58.0992	-37.679		58.0992	-37.679		58.0827	-35.364		58.0746	-29.748		58.1161	-31.209
58.1248	-32.601		58.1328	-34.361		58.1168	-35.805		58.1409	-37.751		58.1409	-37.751		58.1244	-35.429		58.1163	-29.798		58.1577	-31.263
58.1664	-32.647		58.1745	-34.434		58.1585	-35.859		58.1826	-37.817		58.1826	-37.817		58.166	-35.496		58.1579	-29.846		58.1994	-31.318
58.2081	-32.69		58.2161	-34.504		58.2002	-35.913		58.2242	-37.881		58.2242	-37.881		58.2077	-35.559		58.1996	-29.893		58.2411	-31.374
58.2498	-32.732		58.2578	-34.566		58.2418	-35.966		58.2659	-37.942		58.2659	-37.942		58.2494	-35.62		58.2413	-29.939		58.2827	-31.429
58.2914	-32.773		58.2995	-34.622		58.2835	-36.015		58.3075	-38.002		58.3075	-38.002		58.291	-35.68		58.2829	-29.982		58.3244	-31.483
58.3331	-32.814		58.3411	-34.672		58.3252	-36.061		58.3492	-38.063		58.3492	-38.063		58.3327	-35.737		58.3246	-30.023		58.3661	-31.537
58.3748	-32.854		58.3828	-34.718		58.3668	-36.104		58.3909	-38.119		58.3909	-38.119		58.3744	-35.793		58.3663	-30.062		58.4077	-31.588
58.4164	-32.892		58.4245	-34.762		58.4085	-36.147		58.4325	-38.174		58.4325	-38.174		58.416	-35.848		58.4079	-30.099		58.4494	-31.635
58.4581	-32.931		58.4661	-34.803		58.4502	-36.188		58.4742	-38.226		58.4742	-38.226		58.4577	-35.9		58.4496	-30.136		58.4911	-31.682
58.4998	-32.969		58.5078	-34.841		58.4918	-36.227		58.5159	-38.279		58.5159	-38.279		58.4994	-35.953		58.4913	-30.171		58.5327	-31.727
58.5414	-33.005		58.5495	-34.876		58.5335	-36.265		58.5576	-38.328		58.5576	-38.328		58.541	-36.005		58.5329	-30.205		58.5744	-31.771
58.5831	-33.039		58.5911	-34.91		58.5752	-36.301		58.5992	-38.377		58.5992	-38.377		58.5827	-36.054		58.5746	-30.239		58.6161	-31.814
58.6247	-33.075		58.6328	-34.943		58.6168	-36.336		58.6409	-38.424		58.6409	-38.424		58.6244	-36.104		58.6163	-30.269		58.6577	-31.856
58.6664	-33.11		58.6745	-34.974		58.6585	-36.369		58.6826	-38.47		58.6826	-38.47		58.666	-36.152		58.6579	-30.299		58.6994	-31.896
58.7081	-33.145		58.7161	-35.003		58.7002	-36.4		58.7242	-38.515		58.7242	-38.515		58.7077	-36.2		58.6996	-30.327		58.7411	-31.935
58.7498	-33.178		58.7578	-35.032		58.7418	-36.43		58.7659	-38.559		58.7659	-38.559		58.7494	-36.248		58.7413	-30.355		58.7827	-31.973
58.7914	-33.209		58.7995	-35.06		58.7835	-36.458		58.8076	-38.603		58.8076	-38.603		58.791	-36.293		58.7829	-30.38		58.8244	-32.01
58.8331	-33.24		58.8411	-35.086		58.8252	-36.486		58.8492	-38.645		58.8492	-38.645		58.8327	-36.337		58.8246	-30.405		58.8661	-32.045
58.8748	-33.27		58.8828	-35.112		58.8668	-36.512		58.8909	-38.685		58.8909	-38.685		58.8744	-36.381		58.8663	-30.431		58.9077	-32.08
58.9164	-33.298		58.9245	-35.137		58.9085	-36.538		58.9326	-38.723		58.9326	-38.723		58.916	-36.423		58.9079	-30.454		58.9494	-32.113
58.9581	-33.326		58.9661	-35.162		58.9502	-36.564		58.9742	-38.76		58.9742	-38.76		58.9577	-36.462		58.9496	-30.478		58.9911	-32.144
58.9998	-33.354		59.0078	-35.185		58.9918	-36.588		59.0159	-38.794		59.0159	-38.794		58.9994	-36.499		58.9913	-30.5		59.0327	-32.176
59.0414	-33.38		59.0495	-35.207		59.0335	-36.611		59.0576	-38.827		59.0576	-38.827		59.041	-36.535		59.0329	-30.522		59.0744	-32.206
59.0831	-33.407		59.0911	-35.23		59.0752	-36.633		59.0992	-38.859		59.0992	-38.859		59.0827	-36.57		59.0746	-30.543		59.1161	-32.234
59.1248	-33.432		59.1328	-35.251		59.1168	-36.654		59.1409	-38.889		59.1409	-38.889		59.1244	-36.603		59.1163	-30.564		59.1577	-32.261
59.1664	-33.456		59.1745	-35.273		59.1585	-36.676		59.1826	-38.918		59.1826	-38.918		59.166	-36.634		59.1579	-30.582		59.1994	-32.288
59.2081	-33.477		59.2161	-35.293		59.2001	-36.697		59.2242	-38.945		59.2242	-38.945		59.2077	-36.664		59.1996	-30.601		59.2411	-32.313
59.2498	-33.498		59.2578	-35.314		59.2418	-36.718		59.2659	-38.972		59.2659	-38.972		59.2494	-36.693		59.2413	-30.619		59.2827	-32.337
59.2914	-33.518		59.2995	-35.334		59.2835	-36.738		59.3076	-38.998		59.3076	-38.998		59.291	-36.722		59.2829	-30.636		59.3244	-32.362
59.3331	-33.537		59.3411	-35.353		59.3251	-36.757		59.3492	-39.022		59.3492	-39.022		59.3327	-36.749		59.3246	-30.652		59.3661	-32.385
59.3748	-33.556		59.3828	-35.371		59.3668	-36.776		59.3909	-39.045		59.3909	-39.045		59.3744	-36.774		59.3663	-30.667		59.4077	-32.407
59.4164	-33.575		59.4244	-35.388		59.4085	-36.793		59.4326	-39.067		59.4326	-39.067		59.416	-36.8		59.4079	-30.682		59.4494	-32.429
59.4581	-33.594		59.4661	-35.403		59.4502	-36.808		59.4742	-39.088		59.4742	-39.088		59.4577	-36.824		59.4496	-30.696		59.4911	-32.45
59.4998	-33.612		59.5078	-35.418		59.4918	-36.824		59.5159	-39.107		59.5159	-39.107		59.4994	-36.848		59.4913	-30.708		59.5328	-32.47
59.5414	-33.629		59.5494	-35.432		59.5335	-36.839		59.5575	-39.125		59.5575	-39.125		59.541	-36.871		59.5329	-30.72		59.5744	-32.49
59.5831	-33.644		59.5911	-35.446		59.5751	-36.852		59.5992	-39.143		59.5992	-39.143		59.5827	-36.893		59.5746	-30.73		59.6161	-32.508
59.6248	-33.659		59.6411	-35.462		59.6168	-36.865		59.6409	-39.16		59.6409	-39.16		59.6244	-36.913		59.6163	-30.74		59.6577	-32.526
59.6664	-33.674		59.6828	-35.476		59.6585	-36.877		59.6825	-39.175		59.6825	-39.175		59.666	-36.933		59.6579	-30.75		59.6994	-32.543
59.7081	-33.689		59.7244	-35.488		59.7001	-36.889		59.7242	-39.191		59.7242	-39.191		59.7077	-36.951		59.6996	-30.759		59.7411	-32.561
59.7498	-33.704		59.7661	-35.498		59.7418	-36.902		59.7659	-39.205		59.7659	-39.205		59.7494	-36.968		59.7413	-30.768		59.7828	-32.577
59.7914	-33.719		59.8078	-35.507		59.7835	-36.914		59.8075	-39.218		59.8075	-39.218		59.791	-36.984		59.7829	-30.778		59.8244	-32.591
59.8331	-33.733		59.8494	-35.516		59.8252	-36.925		59.8492	-39.229		59.8492	-39.229		59.8327	-37		59.8246	-30.786		59.8661	-32.605
59.8748	-33.748		59.8911	-35.524		59.8668	-36.936		59.8909	-39.241		59.8909	-39.241		59.8744	-37.014		59.8663	-30.795		59.9078	-32.619
59.9164	-33.762		59.9328	-35.533		59.9085	-36.945		59.9325	-39.251		59.9325	-39.251		59.916	-37.027		59.9079	-30.804		59.9494	-32.632
59.9581	-33.776		59.9744	-35.539		59.9502	-36.954		59.9742	-39.262		59.9742	-39.262		59.9577	-37.04		59.9496	-30.812		59.9911	-32.644
59.9998	-33.791		60.0161	-35.545		59.9918	-36.964		60.0159	-39.271		60.0159	-39.271		59.9994	-37.052		59.9913	-30.821		60.0328	-32.656
60.0414	-33.805		60.0578	-35.55		60.0335	-36.971		60.0575	-39.28		60.0575	-39.28		60.041	-37.063		60.0329	-30.829		60.0744	-32.668
60.0831	-33.818		60.0994	-35.555		60.0752	-36.979		60.0992	-39.289		60.0992	-39.289		60.0827	-37.072		60.0746	-30.837		60.1161	-32.678
60.1247	-33.83		60.1411	-35.56		60.1168	-36.985		60.1409	-39.298		60.1409	-39.298		60.1244	-37.081		60.1163	-30.845		60.1578	-32.688
60.1664	-33.842		60.1828	-35.564		60.1585	-36.991		60.1825	-39.306		60.1825	-39.306		60.166	-37.09		60.1579	-30.852		60.1994	-32.697
60.2081	-33.852		60.2244	-35.568		60.2002	-36.997		60.2242	-39.315		60.2242	-39.315		60.2077	-37.099		60.1996	-30.859		60.2411	-32.705
60.2498	-33.862		60.2661	-35.572		60.2418	-37.003		60.2659	-39.323		60.2659	-39.323		60.2494	-37.108		60.2413	-30.866		60.2828	-32.714
60.2914	-33.872		60.3078	-35.576		60.2835	-37.01		60.3075	-39.331		60.3075	-39.331		60.291	-37.117		60.2829	-30.872		60.3244	-32.722
60.3331	-33.88		60.3494	-35.58		60.3252	-37.017		60.3492	-39.338		60.3492	-39.338		60.3327	-37.125		60.3246	-30.878		60.3661	-32.728
60.3748	-33.888		60.3911	-35.584		60.3668	-37.023		60.3909	-39.346		60.3909	-39.346		60.3744	-37.133		60.3663	-30.884		60.4078	-32.735
60.4164	-33.896		60.4328	-35.587		60.4085	-37.029		60.4325	-39.353		60.4325	-39.353		60.416	-37.141		60.4079	-30.888		60.4494	-32.741
60.4581	-33.904		60.4744	-35.59		60.4502	-37.034		60.4742	-39.358		60.4742	-39.358		60.4577	-37.149		60.4496	-30.893		60.4911	-32.747
60.4997	-33.912		60.5161	-35.592		60.4918	-37.039		60.5159	-39.364		60.5159	-39.364		60.4993	-37.156		60.4913	-30.897		60.5328	-32.753
60.5414	-33.921		60.5578	-35.594		60.5335	-37.043		60.5575	-39.369		60.5575	-39.369		60.541	-37.163		60.5329	-30.902		60.5744	-32.758
60.5831	-33.929		60.5994	-35.596		60.5752	-37.047		60.5992	-39.373		60.5992	-39.373		60.5827	-37.169		60.5746	-30.906		60.6161	-32.764
60.6247	-33.937		60.6411	-35.597		60.6168	-37.051		60.6409	-39.377		60.6409	-39.377		60.6243	-37.175		60.6163	-30.91		60.6578	-32.769
60.6664	-33.944		60.6828	-35.598		60.6585	-37.055		60.6825	-39.381		60.6825	-39.381		60.666	-37.18		60.6579	-30.914		60.6994	-32.774
60.7081	-33.952		60.7244	-35.599		60.7002	-37.058		60.7242	-39.384		60.7242	-39.384		60.7077	-37.185		60.6996	-30.918		60.7411	-32.779
60.7497	-33.959		60.7661	-35.6		60.7418	-37.061		60.7659	-39.387		60.7659	-39.387		60.7494	-37.189		60.7413	-30.922		60.7828	-32.784
60.7914	-33.966		60.8078	-35.6		60.7835	-37.064		60.8075	-39.389		60.8075	-39.389		60.791	-37.193		60.7829	-30.926		60.8244	-32.788
60.8331	-33.972		60.8494	-35.601		60.8252	-37.066		60.8492	-39.391		60.8492	-39.391		60.8327	-37.196		60.8246	-30.93		60.8661	-32.792
60.8747	-33.977		60.8911	-35.602		60.8668	-37.069		60.8909	-39.394		60.8909	-39.394		60.8743	-37.2		60.8663	-30.933		60.9078	-32.796
60.9164	-33.982		60.9328	-35.602		60.9085	-37.072		60.9326	-39.395		60.9326	-39.395		60.916	-37.203		60.9079	-30.936		60.9494	-32.799
60.9581	-33.987		60.9744	-35.603		60.9502	-37.075		60.9742	-39.397		60.9742	-39.397		60.9577	-37.206		60.9496	-30.939		60.9911	-32.802
60.9997	-33.992		61.0161	-35.603		60.9918	-37.078		61.0159	-39.399		61.0159	-39.399		60.9993	-37.209		60.9913	-30.941		61.0328	-32.805
61.0414	-33.998		61.0578	-35.603		61.0335	-37.08		61.0575	-39.4		61.0575	-39.4		61.041	-37.212		61.0329	-30.944		61.0744	-32.808
61.0831	-34.002		61.0994	-35.603		61.0751	-37.082		61.0992	-39.401		61.0992	-39.401		61.0827	-37.215		61.0746	-30.945		61.1161	-32.81
61.1247	-34.007		61.1411	-35.604		61.1168	-37.084		61.1409	-39.402		61.1409	-39.402		61.1243	-37.217		61.1163	-30.947		61.1578	-32.812
61.1664	-34.011		61.1828	-35.604		61.1585	-37.085		61.1825	-39.402		61.1825	-39.402		61.166	-37.219		61.1579	-30.949		61.1994	-32.815
61.2081	-34.016		61.2244	-35.604		61.2002	-37.086		61.2242	-39.403		61.2242	-39.403		61.2077	-37.221		61.1996	-30.95		61.2411	-32.817
61.2497	-34.019		61.2661	-35.604		61.2418	-37.087		61.2659	-39.403		61.2659	-39.403		61.2493	-37.223		61.2413	-30.952		61.2828	-32.819
61.2914	-34.023		61.3078	-35.604		61.2835	-37.088		61.3075	-39.403		61.3075	-39.403		61.291	-37.224		61.2829	-30.953		61.3245	-32.822
61.3331	-34.027		61.3494	-35.604		61.3252	-37.089		61.3492	-39.403		61.3492	-39.403		61.3327	-37.225		61.3246	-30.955		61.3661	-32.824
61.3747	-34.031		61.3911	-35.604		61.3668	-37.091		61.3909	-39.404		61.3909	-39.404		61.3743	-37.226		61.3663	-30.957		61.4078	-32.826
61.4164	-34.035		61.4328	-35.604		61.4085	-37.092		61.4325	-39.404		61.4325	-39.404		61.416	-37.226		61.4079	-30.958		61.4495	-32.828
61.4581	-34.04		61.4744	-35.604		61.4502	-37.093		61.4742	-39.404		61.4742	-39.404		61.4577	-37.227		61.4496	-30.96		61.4911	-32.83
61.4997	-34.045		61.5161	-35.604		61.4918	-37.094		61.5159	-39.404		61.5159	-39.404		61.4993	-37.227		61.4913	-30.961		61.5328	-32.831
61.5414	-34.05		61.5578	-35.604		61.5335	-37.095		61.5575	-39.404		61.5575	-39.404		61.541	-37.227		61.5329	-30.962		61.5745	-32.832
61.5831	-34.054		61.5994	-35.604		61.5752	-37.095		61.5992	-39.404		61.5992	-39.404		61.5827	-37.228		61.5746	-30.963		61.6161	-32.833
61.6247	-34.059		61.6411	-35.604		61.6168	-37.096		61.6409	-39.404		61.6409	-39.404		61.6243	-37.228		61.6163	-30.964		61.6578	-32.834
61.6664	-34.063		61.6828	-35.604		61.6585	-37.096		61.6825	-39.404		61.6825	-39.404		61.666	-37.228		61.6579	-30.965		61.6995	-32.835
61.7081	-34.068		61.7244	-35.604		61.7001	-37.097		61.7242	-39.404		61.7242	-39.404		61.7077	-37.229		61.6996	-30.966		61.7411	-32.836
61.7497	-34.072		61.7661	-35.604		61.7418	-37.098		61.7659	-39.404		61.7659	-39.404		61.7493	-37.229		61.7413	-30.966		61.7828	-32.837
61.7914	-34.076		61.8078	-35.603		61.7835	-37.098		61.8075	-39.404		61.8075	-39.404		61.791	-37.229		61.7829	-30.967		61.8245	-32.838
61.8331	-34.081		61.8494	-35.603		61.8251	-37.099		61.8492	-39.404		61.8492	-39.404		61.8327	-37.229		61.8246	-30.968		61.8661	-32.839
61.8747	-34.085		61.8911	-35.603		61.8668	-37.099		61.8909	-39.404		61.8909	-39.404		61.8743	-37.229		61.8663	-30.968		61.9078	-32.84
61.9164	-34.09		61.9328	-35.603		61.9085	-37.1		61.9325	-39.404		61.9325	-39.404		61.916	-37.229		61.9079	-30.969		61.9495	-32.84
61.9581	-34.095		61.9744	-35.602		61.9501	-37.1		61.9742	-39.403		61.9742	-39.403		61.9577	-37.229		61.9496	-30.969		61.9911	-32.841
61.9997	-34.1		62.0161	-35.602		61.9918	-37.1		62.0159	-39.403		62.0159	-39.403		61.9993	-37.229		61.9913	-30.97		62.0328	-32.842
62.0414	-34.105		62.0578	-35.602		62.0335	-37.101		62.0575	-39.402		62.0575	-39.402		62.041	-37.229		62.0329	-30.97		62.0745	-32.842
62.0831	-34.11		62.0994	-35.601		62.0751	-37.101		62.0992	-39.402		62.0992	-39.402		62.0827	-37.229		62.0746	-30.97		62.1161	-32.843
62.1247	-34.115		62.1411	-35.6		62.1168	-37.102		62.1409	-39.401		62.1409	-39.401		62.1243	-37.229		62.1163	-30.97		62.1578	-32.843
62.1664	-34.12		62.1828	-35.6		62.1585	-37.102		62.1825	-39.4		62.1825	-39.4		62.166	-37.229		62.1579	-30.971		62.1995	-32.844
62.2081	-34.124		62.2244	-35.598		62.2001	-37.103		62.2242	-39.399		62.2242	-39.399		62.2077	-37.229		62.1996	-30.971		62.2411	-32.844
62.2497	-34.127		62.2661	-35.597		62.2418	-37.103		62.2659	-39.397		62.2659	-39.397		62.2493	-37.229		62.2413	-30.971		62.2828	-32.844
62.2914	-34.13		62.3078	-35.595		62.2835	-37.103		62.3075	-39.395		62.3075	-39.395		62.291	-37.229		62.2829	-30.971		62.3245	-32.845
62.3331	-34.132		62.3494	-35.592		62.3251	-37.103		62.3492	-39.392		62.3492	-39.392		62.3327	-37.229		62.3246	-30.971		62.3661	-32.845
62.3747	-34.135		62.3911	-35.59		62.3668	-37.104		62.3909	-39.388		62.3909	-39.388		62.3743	-37.229		62.3663	-30.971		62.4078	-32.845
62.4164	-34.137		62.4328	-35.587		62.4085	-37.104		62.4325	-39.384		62.4325	-39.384		62.416	-37.229		62.4079	-30.972		62.4494	-32.846
62.4581	-34.139		62.4744	-35.585		62.4502	-37.104		62.4742	-39.38		62.4742	-39.38		62.4577	-37.228		62.4496	-30.972		62.4911	-32.846
62.4997	-34.141		62.5161	-35.582		62.4918	-37.104		62.5159	-39.376		62.5159	-39.376		62.4993	-37.228		62.4913	-30.972		62.5328	-32.846
62.5414	-34.143		62.5578	-35.58		62.5335	-37.104		62.5575	-39.371		62.5575	-39.371		62.541	-37.227		62.5329	-30.972		62.5745	-32.846
62.5831	-34.145		62.5994	-35.577		62.5752	-37.104		62.5992	-39.366		62.5992	-39.366		62.5827	-37.227		62.5746	-30.972		62.6161	-32.847
62.6247	-34.148		62.6411	-35.574		62.6168	-37.104		62.6409	-39.36		62.6409	-39.36		62.6243	-37.226		62.6163	-30.972		62.6578	-32.847
62.6664	-34.15		62.6828	-35.571		62.6585	-37.104		62.6825	-39.354		62.6825	-39.354		62.666	-37.225		62.6579	-30.973		62.6995	-32.847
62.7081	-34.153		62.7244	-35.567		62.7068	-37.105		62.7242	-39.348		62.7242	-39.348		62.7077	-37.224		62.6996	-30.973		62.7411	-32.847
62.7497	-34.155		62.7661	-35.562		62.7485	-37.105		62.7659	-39.341		62.7659	-39.341		62.7493	-37.222		62.7413	-30.973		62.7828	-32.847
62.7914	-34.158		62.8078	-35.558		62.7901	-37.105		62.8075	-39.333		62.8075	-39.333		62.791	-37.221		62.7829	-30.973		62.8245	-32.848
62.8331	-34.16		62.8494	-35.553		62.8318	-37.105		62.8492	-39.324		62.8492	-39.324		62.8327	-37.22		62.8246	-30.973		62.8661	-32.848
62.8747	-34.162		62.8911	-35.548		62.8735	-37.105		62.8909	-39.317		62.8909	-39.317		62.8743	-37.218		62.8663	-30.973		62.9078	-32.848
62.9164	-34.164		62.9328	-35.543		62.9151	-37.106		62.9325	-39.309		62.9325	-39.309		62.916	-37.215		62.9079	-30.973		62.9495	-32.848
62.9581	-34.166		62.9744	-35.537		62.9568	-37.106		62.9742	-39.301		62.9742	-39.301		62.9577	-37.212		62.9496	-30.973		62.9911	-32.848
62.9997	-34.168		63.0161	-35.532		62.9985	-37.106		63.0159	-39.293		63.0159	-39.293		62.9993	-37.209		62.9913	-30.973		63.0328	-32.848
63.0414	-34.17		63.0578	-35.526		63.0401	-37.106		63.0575	-39.285		63.0575	-39.285		63.041	-37.205		63.0329	-30.973		63.0745	-32.849
63.0831	-34.172		63.0994	-35.519		63.0818	-37.106		63.0992	-39.277		63.0992	-39.277		63.0827	-37.202		63.0746	-30.973		63.1161	-32.849
63.1247	-34.174		63.1411	-35.512		63.1235	-37.106		63.1409	-39.268		63.1409	-39.268		63.1243	-37.198		63.1163	-30.973		63.1578	-32.849
63.1664	-34.176		63.1828	-35.505		63.1651	-37.106		63.1825	-39.259		63.1825	-39.259		63.166	-37.194		63.1579	-30.973		63.1995	-32.849
63.2081	-34.178		63.2244	-35.497		63.2068	-37.106		63.2242	-39.249		63.2242	-39.249		63.2077	-37.19		63.1996	-30.973		63.2411	-32.849
63.2497	-34.18		63.2661	-35.488		63.2485	-37.106		63.2659	-39.24		63.2659	-39.24		63.2493	-37.185		63.2413	-30.973		63.2828	-32.849
63.2914	-34.182		63.3078	-35.48		63.2901	-37.106		63.3075	-39.231		63.3075	-39.231		63.291	-37.181		63.2829	-30.973		63.3245	-32.849
63.3331	-34.185		63.3494	-35.471		63.3318	-37.106		63.3492	-39.222		63.3492	-39.222		63.3327	-37.176		63.3246	-30.973		63.3661	-32.849
63.3747	-34.187		63.3911	-35.464		63.3735	-37.106		63.3909	-39.213		63.3909	-39.213		63.3743	-37.17		63.3663	-30.973		63.4078	-32.849
63.4164	-34.189		63.4328	-35.456		63.4151	-37.106		63.4325	-39.204		63.4325	-39.204		63.416	-37.164		63.4079	-30.973		63.4495	-32.849
63.4581	-34.19		63.4744	-35.449		63.4568	-37.106		63.4742	-39.196		63.4742	-39.196		63.4577	-37.158		63.4496	-30.973		63.4911	-32.849
63.4997	-34.192		63.5161	-35.442		63.4985	-37.106		63.5159	-39.188		63.5159	-39.188		63.4993	-37.151		63.4913	-30.973		63.5328	-32.849
63.5414	-34.193		63.5578	-35.435		63.5401	-37.106		63.5575	-39.179		63.5575	-39.179		63.541	-37.144		63.5329	-30.973		63.5745	-32.849
63.5831	-34.195		63.5994	-35.427		63.5818	-37.106		63.5992	-39.17		63.5992	-39.17		63.5827	-37.137		63.5746	-30.972		63.6161	-32.849
63.6247	-34.196		63.6411	-35.42		63.6235	-37.106		63.6409	-39.16		63.6409	-39.16		63.6243	-37.13		63.6163	-30.972		63.6578	-32.849
63.6664	-34.197		63.6828	-35.412		63.6651	-37.106		63.6825	-39.151		63.6825	-39.151		63.666	-37.124		63.6579	-30.972		63.6995	-32.849
63.7081	-34.198		63.7244	-35.404		63.7068	-37.106		63.7242	-39.142		63.7242	-39.142		63.7077	-37.118		63.6996	-30.972		63.7411	-32.849
63.7497	-34.199		63.7661	-35.396		63.7485	-37.106		63.7659	-39.133		63.7659	-39.133		63.7493	-37.111		63.7413	-30.972		63.7828	-32.849
63.7914	-34.2		63.8078	-35.388		63.7901	-37.106		63.8075	-39.125		63.8075	-39.125		63.791	-37.105		63.7829	-30.972		63.8245	-32.849
63.8331	-34.201		63.8494	-35.381		63.8318	-37.106		63.8492	-39.117		63.8492	-39.117		63.8327	-37.098		63.8246	-30.972		63.8661	-32.849
63.8747	-34.202		63.8911	-35.373		63.8735	-37.106		63.8909	-39.109		63.8909	-39.109		63.8743	-37.091		63.8663	-30.971		63.9078	-32.849
63.9164	-34.203		63.9328	-35.367		63.9151	-37.106		63.9325	-39.1		63.9325	-39.1		63.916	-37.084		63.9079	-30.971		63.9494	-32.849
63.9581	-34.205		63.9744	-35.361		63.9568	-37.106		63.9742	-39.092		63.9742	-39.092		63.9577	-37.077		63.9496	-30.971		63.9911	-32.849
63.9998	-34.206		64.0161	-35.355		63.9985	-37.106		64.0159	-39.083		64.0159	-39.083		63.9993	-37.07		63.9913	-30.971		64.0328	-32.849
64.0414	-34.208		64.0578	-35.348		64.0401	-37.105		64.0576	-39.073		64.0576	-39.073		64.041	-37.063		64.0329	-30.971		64.0744	-32.848
64.0831	-34.209		64.0994	-35.342		64.0818	-37.105		64.0992	-39.064		64.0992	-39.064		64.0827	-37.056		64.0746	-30.97		64.1161	-32.848
64.1248	-34.21		64.1411	-35.335		64.1235	-37.105		64.1409	-39.055		64.1409	-39.055		64.1243	-37.05		64.1163	-30.97		64.1578	-32.848
64.1664	-34.211		64.1828	-35.328		64.1651	-37.105		64.1826	-39.047		64.1826	-39.047		64.166	-37.044		64.1579	-30.97		64.1995	-32.848
64.2081	-34.212		64.2244	-35.321		64.2068	-37.105		64.2242	-39.039		64.2242	-39.039		64.2077	-37.037		64.1996	-30.97		64.2411	-32.848
64.2498	-34.212		64.2661	-35.316		64.2485	-37.105		64.2659	-39.031		64.2659	-39.031		64.2493	-37.03		64.2413	-30.969		64.2828	-32.848
64.2914	-34.214		64.3078	-35.31		64.2901	-37.105		64.3076	-39.023		64.3076	-39.023		64.291	-37.023		64.2829	-30.969		64.3244	-32.848
64.3331	-34.215		64.3494	-35.305		64.3318	-37.104		64.3492	-39.015		64.3492	-39.015		64.3327	-37.016		64.3246	-30.968		64.3661	-32.848
64.3747	-34.216		64.3911	-35.299		64.3735	-37.104		64.3909	-39.006		64.3909	-39.006		64.3743	-37.009		64.3663	-30.968		64.4078	-32.848
64.4164	-34.217		64.4328	-35.295		64.4151	-37.104		64.4325	-38.997		64.4325	-38.997		64.416	-37.002		64.4079	-30.967		64.4494	-32.847
64.4581	-34.217		64.4744	-35.29		64.4568	-37.103		64.4742	-38.988		64.4742	-38.988		64.4577	-36.995		64.4496	-30.967		64.4911	-32.847
64.4997	-34.218		64.5161	-35.285		64.4985	-37.103		64.5159	-38.98		64.5159	-38.98		64.4993	-36.988		64.4913	-30.966		64.5328	-32.847
64.5414	-34.218		64.5578	-35.28		64.5401	-37.102		64.5575	-38.972		64.5575	-38.972		64.541	-36.982		64.5329	-30.966		64.5744	-32.847
64.5831	-34.219		64.5994	-35.275		64.5818	-37.102		64.5992	-38.964		64.5992	-38.964		64.5827	-36.977		64.5746	-30.965		64.6161	-32.847
64.6248	-34.22		64.6411	-35.27		64.6235	-37.101		64.6409	-38.957		64.6409	-38.957		64.6243	-36.972		64.6229	-30.965		64.6578	-32.847
64.6664	-34.22		64.6828	-35.266		64.6651	-37.1		64.6825	-38.949		64.6825	-38.949		64.666	-36.967		64.6646	-30.964		64.6994	-32.846
64.7081	-34.221		64.7245	-35.263		64.7068	-37.1		64.7242	-38.943		64.7242	-38.943		64.7077	-36.962		64.7063	-30.964		64.7411	-32.846
64.7498	-34.222		64.7661	-35.259		64.7485	-37.1		64.7659	-38.936		64.7659	-38.936		64.7493	-36.957		64.7479	-30.963		64.7828	-32.846
64.7914	-34.223		64.8078	-35.256		64.7901	-37.099		64.8075	-38.93		64.8075	-38.93		64.791	-36.952		64.7896	-30.962		64.8244	-32.846
64.8331	-34.224		64.8495	-35.253		64.8318	-37.099		64.8492	-38.923		64.8492	-38.923		64.8327	-36.947		64.8313	-30.962		64.8661	-32.846
64.8748	-34.225		64.8911	-35.25		64.8735	-37.098		64.8909	-38.916		64.8909	-38.916		64.8743	-36.942		64.8729	-30.961		64.9078	-32.845
64.9164	-34.226		64.9328	-35.246		64.9151	-37.098		64.9325	-38.909		64.9325	-38.909		64.916	-36.937		64.9146	-30.961		64.9494	-32.845
64.9581	-34.227		64.9744	-35.243		64.9568	-37.092		64.9742	-38.902		64.9742	-38.902		64.9577	-36.932		64.9563	-30.96		64.9911	-32.845
64.9998	-34.229		65.0161	-35.24		64.9985	-36.948		65.0159	-38.895		65.0159	-38.895		64.9993	-36.928		64.9979	-30.959		65.0328	-32.845
65.0414	-34.23		65.0578	-35.237		65.0401	-36.875		65.0575	-38.889		65.0575	-38.889		65.041	-36.924		65.0396	-30.959		65.0744	-32.845
65.0831	-34.231		65.0995	-35.233		65.0818	-36.857		65.0992	-38.883		65.0992	-38.883		65.0827	-36.92		65.0813	-30.958		65.1161	-32.844
65.1248	-34.233		65.1411	-35.229		65.1235	-36.846		65.1409	-38.878		65.1409	-38.878		65.1243	-36.917		65.1229	-30.958		65.1578	-32.844
65.1664	-34.234		65.1828	-35.226		65.1651	-36.842		65.1825	-38.872		65.1825	-38.872		65.166	-36.913		65.1646	-30.957		65.1994	-32.844
65.2081	-34.235		65.2245	-35.223		65.2068	-36.844		65.2242	-38.867		65.2242	-38.867		65.2077	-36.909		65.2063	-30.957		65.2411	-32.844
65.2498	-34.236		65.2661	-35.22		65.2485	-36.85		65.2659	-38.861		65.2659	-38.861		65.2493	-36.905		65.2479	-30.957		65.2828	-32.844
65.2914	-34.236		65.3078	-35.217		65.2901	-36.856		65.3075	-38.855		65.3075	-38.855		65.291	-36.901		65.2896	-30.956		65.3244	-32.844
65.3331	-34.237		65.3494	-35.214		65.3318	-36.863		65.3492	-38.849		65.3492	-38.849		65.3327	-36.897		65.3313	-30.956		65.3661	-32.844
65.3748	-34.238		65.3911	-35.212		65.3735	-36.87		65.3909	-38.843		65.3909	-38.843		65.3743	-36.893		65.3729	-30.955		65.4078	-32.844
65.4164	-34.239		65.4328	-35.209		65.4151	-36.876		65.4325	-38.837		65.4325	-38.837		65.416	-36.888		65.4146	-30.955		65.4494	-32.843
65.4581	-34.24		65.4744	-35.206		65.4568	-36.881		65.4742	-38.83		65.4742	-38.83		65.4577	-36.885		65.4563	-30.954		65.4911	-32.843
65.4998	-34.241		65.5161	-35.203		65.4985	-36.885		65.5159	-38.824		65.5159	-38.824		65.4993	-36.881		65.4979	-30.953		65.5327	-32.843
65.5414	-34.242		65.5578	-35.199		65.5401	-36.888		65.5575	-38.818		65.5575	-38.818		65.541	-36.877		65.5396	-30.953		65.5744	-32.843
65.5831	-34.243		65.5994	-35.196		65.5818	-36.891		65.5992	-38.812		65.5992	-38.812		65.5826	-36.874		65.5813	-30.952		65.6161	-32.843
65.6247	-34.244		65.6411	-35.193		65.6235	-36.893		65.6409	-38.806		65.6409	-38.806		65.6243	-36.87		65.6229	-30.951		65.6578	-32.843
65.6664	-34.244		65.6828	-35.19		65.6651	-36.894		65.6825	-38.8		65.6825	-38.8		65.666	-36.866		65.6646	-30.951		65.6994	-32.843
65.7081	-34.245		65.7244	-35.187		65.7068	-36.895		65.7242	-38.794		65.7242	-38.794		65.7077	-36.861		65.7063	-30.95		65.7411	-32.842
65.7498	-34.245		65.7728	-35.183		65.7485	-36.896		65.7659	-38.787		65.7659	-38.787		65.7493	-36.856		65.7479	-30.949		65.7828	-32.842
65.7914	-34.245		65.8144	-35.179		65.7901	-36.896		65.8075	-38.78		65.8075	-38.78		65.791	-36.851		65.7896	-30.948		65.8244	-32.842
65.8331	-34.245		65.8561	-35.176		65.8318	-36.896		65.8492	-38.773		65.8492	-38.773		65.8327	-36.846		65.8313	-30.948		65.8661	-32.842
65.8748	-34.246		65.8978	-35.172		65.8735	-36.896		65.8909	-38.766		65.8909	-38.766		65.8743	-36.841		65.8729	-30.947		65.9078	-32.842
65.9164	-34.246		65.9394	-35.168		65.9151	-36.897		65.9325	-38.758		65.9325	-38.758		65.916	-36.836		65.9146	-30.946		65.9494	-32.842
65.9581	-34.246		65.9811	-35.163		65.9568	-36.897		65.9742	-38.751		65.9742	-38.751		65.9577	-36.832		65.9563	-30.945		65.9911	-32.841
65.9998	-34.246		66.0228	-35.158		65.9985	-36.897		66.0159	-38.743		66.0159	-38.743		65.9993	-36.828		65.998	-30.943		66.0327	-32.841
66.0414	-34.246		66.0644	-35.153		66.0401	-36.896		66.0575	-38.737		66.0575	-38.737		66.041	-36.823		66.0396	-30.942		66.0744	-32.841
66.0831	-34.247		66.1061	-35.148		66.0818	-36.896		66.0992	-38.73		66.0992	-38.73		66.0827	-36.819		66.0813	-30.941		66.1161	-32.841
66.1248	-34.247		66.1478	-35.143		66.1235	-36.896		66.1409	-38.723		66.1409	-38.723		66.1243	-36.814		66.123	-30.94		66.1577	-32.84
66.1664	-34.247		66.1894	-35.138		66.1651	-36.896		66.1825	-38.717		66.1825	-38.717		66.166	-36.808		66.1646	-30.938		66.1994	-32.84
66.2081	-34.247		66.2311	-35.132		66.2068	-36.895		66.2242	-38.709		66.2242	-38.709		66.2077	-36.803		66.2063	-30.937		66.2411	-32.84
66.2498	-34.247		66.2728	-35.127		66.2485	-36.894		66.2659	-38.701		66.2659	-38.701		66.2493	-36.796		66.248	-30.936		66.2827	-32.839
66.2914	-34.247		66.3144	-35.122		66.2901	-36.892		66.3075	-38.693		66.3075	-38.693		66.291	-36.79		66.2896	-30.935		66.3244	-32.839
66.3331	-34.248		66.3561	-35.116		66.3318	-36.89		66.3492	-38.685		66.3492	-38.685		66.3327	-36.784		66.3313	-30.933		66.3661	-32.839
66.3748	-34.248		66.3978	-35.11		66.3735	-36.887		66.3909	-38.677		66.3909	-38.677		66.3743	-36.778		66.3729	-30.931		66.4077	-32.838
66.4248	-34.248		66.4394	-35.104		66.4151	-36.882		66.4325	-38.67		66.4325	-38.67		66.416	-36.772		66.4146	-30.929		66.4494	-32.838
66.4731	-34.248		66.4811	-35.097		66.4568	-36.877		66.4742	-38.662		66.4742	-38.662		66.4577	-36.767		66.4563	-30.927		66.4911	-32.837
66.5148	-34.248		66.5228	-35.089		66.4985	-36.871		66.5159	-38.655		66.5159	-38.655		66.4993	-36.761		66.4979	-30.925		66.5327	-32.837
66.5564	-34.248		66.5644	-35.082		66.5401	-36.864		66.5575	-38.647		66.5575	-38.647		66.541	-36.754		66.5396	-30.923		66.5744	-32.836
66.5981	-34.248		66.6061	-35.076		66.5818	-36.856		66.5992	-38.639		66.5992	-38.639		66.5893	-36.747		66.5813	-30.92		66.6227	-32.835
66.6397	-34.248		66.6478	-35.069		66.6235	-36.848		66.6409	-38.63		66.6409	-38.63		66.631	-36.74		66.6229	-30.918		66.6644	-32.834
66.6814	-34.248		66.6894	-35.063		66.6651	-36.839		66.6825	-38.621		66.6825	-38.621		66.6727	-36.733		66.6646	-30.915		66.7061	-32.833
66.7231	-34.248		66.7311	-35.056		66.7068	-36.829		66.7242	-38.612		66.7242	-38.612		66.7143	-36.725		66.7063	-30.912		66.7477	-32.832
66.7648	-34.248		66.7728	-35.05		66.7485	-36.817		66.7659	-38.603		66.7659	-38.603		66.756	-36.718		66.7479	-30.91		66.7894	-32.831
66.8064	-34.248		66.8144	-35.043		66.7901	-36.805		66.8075	-38.594		66.8075	-38.594		66.7977	-36.711		66.7896	-30.908		66.8311	-32.83
66.8481	-34.248		66.8561	-35.037		66.8318	-36.794		66.8492	-38.586		66.8492	-38.586		66.8393	-36.704		66.8313	-30.905		66.8727	-32.829
66.8898	-34.248		66.8978	-35.03		66.8735	-36.782		66.8909	-38.578		66.8909	-38.578		66.881	-36.697		66.8729	-30.902		66.9144	-32.828
66.9314	-34.248		66.9394	-35.023		66.9151	-36.771		66.9325	-38.569		66.9325	-38.569		66.9227	-36.69		66.9146	-30.9		66.9561	-32.826
66.9731	-34.247		66.9811	-35.016		66.9568	-36.759		66.9742	-38.561		66.9742	-38.561		66.9643	-36.683		66.9563	-30.896		66.9977	-32.825
67.0148	-34.247		67.0228	-35.008		66.9985	-36.747		67.0159	-38.553		67.0159	-38.553		67.006	-36.676		66.9979	-30.893		67.0394	-32.823
67.0564	-34.247		67.0644	-35.001		67.0401	-36.735		67.0575	-38.544		67.0575	-38.544		67.0477	-36.668		67.0396	-30.89		67.0811	-32.821
67.0981	-34.246		67.1061	-34.993		67.0818	-36.723		67.0992	-38.536		67.0992	-38.536		67.0893	-36.66		67.0813	-30.887		67.1227	-32.819
67.1398	-34.246		67.1478	-34.987		67.1235	-36.711		67.1409	-38.526		67.1409	-38.526		67.131	-36.652		67.1229	-30.884		67.1644	-32.817
67.1814	-34.246		67.1894	-34.98		67.1651	-36.698		67.1825	-38.518		67.1825	-38.518		67.1727	-36.643		67.1646	-30.88		67.2061	-32.815
67.2231	-34.245		67.2311	-34.972		67.2068	-36.686		67.2242	-38.51		67.2242	-38.51		67.2143	-36.635		67.2063	-30.877		67.2477	-32.812
67.2648	-34.245		67.2728	-34.965		67.2485	-36.674		67.2659	-38.502		67.2659	-38.502		67.256	-36.627		67.248	-30.874		67.2894	-32.81
67.3064	-34.244		67.3144	-34.957		67.2901	-36.662		67.3075	-38.494		67.3075	-38.494		67.2977	-36.62		67.2896	-30.871		67.3311	-32.807
67.3481	-34.244		67.3561	-34.95		67.3318	-36.651		67.3492	-38.487		67.3492	-38.487		67.3393	-36.612		67.3313	-30.868		67.3727	-32.805
67.3898	-34.243		67.3978	-34.942		67.3735	-36.641		67.3909	-38.479		67.3909	-38.479		67.381	-36.605		67.373	-30.865		67.4144	-32.803
67.4314	-34.242		67.4394	-34.935		67.4151	-36.631		67.4325	-38.471		67.4325	-38.471		67.4227	-36.598		67.4146	-30.862		67.4561	-32.8
67.4731	-34.241		67.4811	-34.928		67.4568	-36.621		67.4742	-38.463		67.4742	-38.463		67.4643	-36.59		67.4563	-30.858		67.4977	-32.797
67.5148	-34.239		67.5228	-34.922		67.4985	-36.611		67.5159	-38.453		67.5159	-38.453		67.506	-36.582		67.498	-30.854		67.5394	-32.794
67.5564	-34.238		67.5644	-34.916		67.5402	-36.601		67.5575	-38.444		67.5575	-38.444		67.5477	-36.574		67.5396	-30.85		67.5811	-32.79
67.5981	-34.236		67.6061	-34.909		67.5818	-36.591		67.5992	-38.435		67.5992	-38.435		67.5893	-36.567		67.5813	-30.846		67.6227	-32.787
67.6398	-34.234		67.6478	-34.903		67.6235	-36.581		67.6409	-38.426		67.6409	-38.426		67.631	-36.559		67.623	-30.842		67.6644	-32.784
67.6814	-34.232		67.6894	-34.897		67.6651	-36.573		67.6825	-38.418		67.6825	-38.418		67.6727	-36.551		67.6646	-30.839		67.7061	-32.781
67.7231	-34.23		67.7311	-34.891		67.7068	-36.565		67.7309	-38.408		67.7309	-38.408		67.7143	-36.543		67.7063	-30.835		67.7477	-32.779
67.7648	-34.227		67.7728	-34.885		67.7485	-36.557		67.7725	-38.401		67.7725	-38.401		67.756	-36.535		67.748	-30.831		67.7894	-32.776
67.8064	-34.225		67.8144	-34.879		67.7901	-36.55		67.8142	-38.392		67.8142	-38.392		67.7977	-36.527		67.7896	-30.827		67.8311	-32.773
67.8481	-34.222		67.8561	-34.871		67.8318	-36.542		67.8559	-38.384		67.8559	-38.384		67.8393	-36.519		67.8313	-30.823		67.8727	-32.771
67.8898	-34.218		67.8978	-34.864		67.8735	-36.534		67.8975	-38.375		67.8975	-38.375		67.881	-36.511		67.8729	-30.819		67.9144	-32.767
67.9314	-34.215		67.9394	-34.858		67.9151	-36.527		67.9392	-38.364		67.9392	-38.364		67.9227	-36.503		67.9146	-30.814		67.9561	-32.764
67.9731	-34.21		67.9811	-34.851		67.9568	-36.519		67.9809	-38.355		67.9809	-38.355		67.9643	-36.494		67.9563	-30.81		67.9977	-32.761
68.0148	-34.206		68.0228	-34.845		67.9985	-36.51		68.0225	-38.345		68.0225	-38.345		68.006	-36.484		67.9979	-30.805		68.0394	-32.756
68.0564	-34.201		68.0644	-34.839		68.0401	-36.502		68.0642	-38.336		68.0642	-38.336		68.0477	-36.475		68.0396	-30.8		68.0811	-32.752
68.0981	-34.197		68.1061	-34.833		68.0818	-36.493		68.1059	-38.326		68.1059	-38.326		68.0893	-36.465		68.0813	-30.795		68.1227	-32.747
68.1398	-34.193		68.1478	-34.826		68.1235	-36.486		68.1475	-38.317		68.1475	-38.317		68.131	-36.456		68.123	-30.79		68.1644	-32.742
68.1814	-34.189		68.1894	-34.819		68.1651	-36.478		68.1892	-38.308		68.1892	-38.308		68.1727	-36.447		68.1646	-30.785		68.2061	-32.737
68.2231	-34.185		68.2311	-34.812		68.2068	-36.471		68.2309	-38.298		68.2309	-38.298		68.2143	-36.438		68.2063	-30.78		68.2477	-32.732
68.2648	-34.181		68.2728	-34.804		68.2485	-36.463		68.2725	-38.287		68.2725	-38.287		68.256	-36.429		68.248	-30.774		68.2894	-32.727
68.3064	-34.175		68.3144	-34.795		68.2901	-36.456		68.3142	-38.276		68.3142	-38.276		68.2977	-36.419		68.2896	-30.769		68.331	-32.722
68.3481	-34.17		68.3561	-34.787		68.3318	-36.448		68.3559	-38.265		68.3559	-38.265		68.3393	-36.409		68.3313	-30.763		68.3727	-32.716
68.3898	-34.164		68.3978	-34.778		68.3735	-36.439		68.3975	-38.253		68.3975	-38.253		68.381	-36.398		68.373	-30.756		68.4144	-32.711
68.4314	-34.159		68.4394	-34.77		68.4151	-36.429		68.4392	-38.241		68.4392	-38.241		68.4227	-36.387		68.4146	-30.749		68.456	-32.704
68.4731	-34.153		68.4811	-34.761		68.4568	-36.421		68.4809	-38.23		68.4809	-38.23		68.4643	-36.377		68.4563	-30.741		68.4977	-32.698
68.5148	-34.147		68.5228	-34.753		68.4985	-36.412		68.5225	-38.219		68.5225	-38.219		68.506	-36.366		68.4979	-30.734		68.5394	-32.691
68.5564	-34.141		68.5644	-34.745		68.5401	-36.403		68.5642	-38.207		68.5642	-38.207		68.5477	-36.356		68.5396	-30.726		68.581	-32.685
68.5981	-34.135		68.6061	-34.735		68.5818	-36.394		68.6059	-38.195		68.6059	-38.195		68.5893	-36.345		68.5813	-30.719		68.6227	-32.679
68.6398	-34.129		68.6478	-34.726		68.6235	-36.386		68.6475	-38.183		68.6475	-38.183		68.631	-36.334		68.623	-30.712		68.6644	-32.672
68.6814	-34.122		68.6894	-34.716		68.6651	-36.377		68.6892	-38.169		68.6892	-38.169		68.6727	-36.322		68.6646	-30.705		68.706	-32.666
68.7231	-34.116		68.7311	-34.706		68.7068	-36.368		68.7309	-38.155		68.7309	-38.155		68.7143	-36.309		68.7063	-30.698		68.7477	-32.659
68.7648	-34.108		68.7728	-34.697		68.7485	-36.359		68.7725	-38.142		68.7725	-38.142		68.756	-36.296		68.748	-30.691		68.7894	-32.652
68.8064	-34.099		68.8144	-34.688		68.7901	-36.349		68.8142	-38.129		68.8142	-38.129		68.7977	-36.282		68.7896	-30.683		68.831	-32.644
68.8481	-34.09		68.8561	-34.68		68.8318	-36.338		68.8559	-38.116		68.8559	-38.116		68.8393	-36.269		68.8313	-30.675		68.8727	-32.636
68.8898	-34.081		68.8978	-34.672		68.8735	-36.328		68.8975	-38.103		68.8975	-38.103		68.881	-36.256		68.873	-30.667		68.9144	-32.628
68.9314	-34.073		68.9394	-34.664		68.9151	-36.318		68.9392	-38.09		68.9392	-38.09		68.9227	-36.244		68.9146	-30.66		68.956	-32.62
68.9731	-34.065		68.9811	-34.656		68.9568	-36.308		68.9809	-38.077		68.9809	-38.077		68.9643	-36.232		68.9563	-30.653		68.9977	-32.613
69.0148	-34.058		69.0228	-34.648		68.9985	-36.299		69.0225	-38.064		69.0225	-38.064		69.006	-36.22		68.998	-30.646		69.0393	-32.605
69.0564	-34.052		69.0644	-34.641		69.0401	-36.29		69.0642	-38.05		69.0642	-38.05		69.0477	-36.207		69.0396	-30.639		69.081	-32.598
69.0981	-34.046		69.1061	-34.634		69.0818	-36.282		69.1059	-38.035		69.1059	-38.035		69.0893	-36.194		69.0813	-30.632		69.1227	-32.591
69.1398	-34.04		69.1478	-34.629		69.1235	-36.274		69.1475	-38.023		69.1475	-38.023		69.131	-36.181		69.123	-30.625		69.1643	-32.585
69.1814	-34.033		69.1894	-34.623		69.1651	-36.266		69.1892	-38.01		69.1892	-38.01		69.1727	-36.169		69.1646	-30.618		69.206	-32.578
69.2231	-34.027		69.2311	-34.618		69.2068	-36.259		69.2309	-37.998		69.2309	-37.998		69.2143	-36.157		69.2063	-30.611		69.2476	-32.572
69.2648	-34.02		69.2728	-34.614		69.2485	-36.252		69.2725	-37.988		69.2725	-37.988		69.256	-36.147		69.248	-30.604		69.2893	-32.566
69.3064	-34.014		69.3144	-34.611		69.2901	-36.245		69.3142	-37.978		69.3142	-37.978		69.2977	-36.137		69.2896	-30.596		69.331	-32.56
69.3481	-34.008		69.3561	-34.607		69.3318	-36.24		69.3559	-37.968		69.3559	-37.968		69.3393	-36.127		69.3313	-30.59		69.3726	-32.554
69.3898	-34.004		69.3978	-34.604		69.3735	-36.235		69.3975	-37.959		69.3975	-37.959		69.381	-36.119		69.373	-30.584		69.4143	-32.548
69.4314	-33.999		69.4394	-34.602		69.4151	-36.231		69.4392	-37.95		69.4392	-37.95		69.4227	-36.11		69.4146	-30.578		69.456	-32.544
69.4731	-33.996		69.4811	-34.6		69.4568	-36.228		69.4809	-37.94		69.4809	-37.94		69.4643	-36.102		69.4563	-30.574		69.4976	-32.539
69.5148	-33.993		69.5228	-34.598		69.4985	-36.225		69.5225	-37.932		69.5225	-37.932		69.506	-36.094		69.498	-30.57		69.5393	-32.535
69.5564	-33.991		69.5644	-34.596		69.5401	-36.223		69.5642	-37.925		69.5642	-37.925		69.5477	-36.086		69.5396	-30.566		69.581	-32.532
69.5981	-33.988		69.6061	-34.595		69.5818	-36.222		69.6059	-37.918		69.6059	-37.918		69.5893	-36.079		69.5813	-30.563		69.6226	-32.529
69.6398	-33.986		69.6478	-34.594		69.6235	-36.22		69.6475	-37.912		69.6475	-37.912		69.631	-36.073		69.623	-30.561		69.6643	-32.526
69.6814	-33.985		69.6894	-34.593		69.6651	-36.219		69.6892	-37.907		69.6892	-37.907		69.6727	-36.067		69.6646	-30.558		69.706	-32.524
69.7231	-33.983		69.7311	-34.592		69.7068	-36.218		69.7309	-37.903		69.7309	-37.903		69.7143	-36.062		69.7063	-30.556		69.7476	-32.522
69.7648	-33.982		69.7728	-34.592		69.7485	-36.218		69.7725	-37.898		69.7725	-37.898		69.756	-36.058		69.7479	-30.553		69.7893	-32.52
69.8064	-33.981		69.8144	-34.592		69.7901	-36.217		69.8142	-37.895		69.8142	-37.895		69.7977	-36.055		69.7896	-30.552		69.831	-32.518
69.8481	-33.98		69.8561	-34.592		69.8318	-36.217		69.8559	-37.891		69.8559	-37.891		69.8393	-36.053		69.8313	-30.55		69.8726	-32.516
69.8898	-33.979		69.8978	-34.592		69.8735	-36.217		69.8975	-37.888		69.8975	-37.888		69.881	-36.05		69.873	-30.549		69.9143	-32.515
69.9314	-33.979		69.9394	-34.591		69.9152	-36.216		69.9392	-37.886		69.9392	-37.886		69.9227	-36.048		69.9146	-30.548		69.956	-32.513
69.9731	-33.978		69.9811	-34.591		69.9568	-36.216		69.9809	-37.883		69.9809	-37.883		69.9643	-36.046		69.9563	-30.547		69.9976	-32.512
70.0148	-33.978		70.0228	-34.591		69.9985	-36.216		70.0225	-37.881		70.0225	-37.881		70.006	-36.044		69.998	-30.546		70.0393	-32.511
70.0564	-33.977		70.0644	-34.591		70.0402	-36.216		70.0642	-37.879		70.0642	-37.879		70.0477	-36.043		70.0396	-30.545		70.0809	-32.51
70.0981	-33.977		70.1061	-34.591		70.0818	-36.216		70.1059	-37.877		70.1059	-37.877		70.0893	-36.042		70.0813	-30.545		70.1226	-32.51
70.1398	-33.977		70.1478	-34.591		70.1235	-36.216		70.1475	-37.876		70.1475	-37.876		70.131	-36.041		70.123	-30.544		70.1643	-32.509
70.1814	-33.977		70.1894	-34.591		70.1652	-36.216		70.1892	-37.875		70.1892	-37.875		70.1727	-36.04		70.1646	-30.544		70.2059	-32.508
70.2231	-33.976		70.2311	-34.591		70.2068	-36.216		70.2309	-37.875		70.2309	-37.875		70.2143	-36.04		70.2063	-30.543		70.2476	-32.508
70.2648	-33.976		70.2728	-34.591		70.2485	-36.216		70.2725	-37.874		70.2725	-37.874		70.256	-36.039		70.248	-30.542		70.2893	-32.507
70.3064	-33.976		70.3145	-34.591		70.2901	-36.216		70.3142	-37.874		70.3142	-37.874		70.2977	-36.039		70.2896	-30.542		70.3309	-32.506
70.3481	-33.976		70.3561	-34.591		70.3318	-36.216		70.3559	-37.874		70.3559	-37.874		70.3393	-36.039		70.3313	-30.541		70.3726	-32.506
70.3898	-33.976		70.3978	-34.591		70.3735	-36.216		70.3975	-37.873		70.3975	-37.873		70.381	-36.038		70.373	-30.541		70.4143	-32.505
70.4314	-33.976		70.4394	-34.591		70.4151	-36.216		70.4392	-37.873		70.4392	-37.873		70.4227	-36.038		70.4146	-30.54		70.4559	-32.505
70.4731	-33.976		70.4811	-34.591		70.4568	-36.216		70.4809	-37.872		70.4809	-37.872		70.4643	-36.038		70.4563	-30.54		70.4976	-32.504
70.5148	-33.975		70.5228	-34.591		70.4985	-36.216		70.5225	-37.872		70.5225	-37.872		70.506	-36.038		70.498	-30.54		70.5393	-32.504
70.5564	-33.975		70.5644	-34.591		70.5401	-36.216		70.5642	-37.872		70.5642	-37.872		70.5477	-36.037		70.5396	-30.539		70.5809	-32.503
70.5981	-33.975		70.6061	-34.591		70.5818	-36.216		70.6059	-37.872		70.6059	-37.872		70.5893	-36.037		70.5813	-30.539		70.6226	-32.503
70.6398	-33.975		70.6478	-34.591		70.6235	-36.216		70.6475	-37.871		70.6475	-37.871		70.631	-36.037		70.623	-30.539		70.6643	-32.502
70.6814	-33.975		70.6894	-34.59		70.6651	-36.216		70.6892	-37.871		70.6892	-37.871		70.6727	-36.037		70.6646	-30.538		70.7059	-32.502
70.7231	-33.975		70.7311	-34.59		70.7068	-36.216		70.7309	-37.871		70.7309	-37.871		70.7143	-36.036		70.7063	-30.538		70.7476	-32.501
70.7648	-33.975		70.7728	-34.59		70.7485	-36.216		70.7725	-37.871		70.7725	-37.871		70.756	-36.036		70.748	-30.537		70.7893	-32.5
70.8064	-33.974		70.8144	-34.59		70.7901	-36.216		70.8142	-37.87		70.8142	-37.87		70.7977	-36.036		70.7896	-30.537		70.8309	-32.5
70.8481	-33.974		70.8561	-34.59		70.8318	-36.216		70.8559	-37.87		70.8559	-37.87		70.8393	-36.036		70.8313	-30.536		70.8726	-32.498
70.8898	-33.974		70.8978	-34.59		70.8735	-36.216		70.8975	-37.87		70.8975	-37.87		70.881	-36.035		70.873	-30.535		70.9143	-32.497
70.9314	-33.974		70.9394	-34.589		70.9151	-36.216		70.9392	-37.869		70.9392	-37.869		70.9227	-36.035		70.9146	-30.534		70.956	-32.496
70.9731	-33.974		70.9811	-34.589		70.9568	-36.216		70.9809	-37.869		70.9809	-37.869		70.9644	-36.035		70.9563	-30.533		70.9976	-32.495
71.0148	-33.973		71.0228	-34.589		70.9985	-36.216		71.0225	-37.868		71.0225	-37.868		71.006	-36.035		70.9979	-30.532		71.0393	-32.493
71.0564	-33.973		71.0644	-34.589		71.0401	-36.216		71.0642	-37.867		71.0642	-37.867		71.0477	-36.034		71.0396	-30.531		71.0809	-32.492
71.0981	-33.973		71.1061	-34.588		71.0818	-36.216		71.1059	-37.866		71.1059	-37.866		71.0893	-36.034		71.0813	-30.529		71.1226	-32.491
71.1398	-33.973		71.1478	-34.588		71.1235	-36.216		71.1475	-37.865		71.1475	-37.865		71.131	-36.033		71.123	-30.528		71.1643	-32.49
71.1814	-33.972		71.1894	-34.587		71.1651	-36.216		71.1892	-37.864		71.1892	-37.864		71.1727	-36.033		71.1646	-30.527		71.206	-32.488
71.2231	-33.972		71.2311	-34.586		71.2068	-36.216		71.2309	-37.863		71.2309	-37.863		71.2143	-36.032		71.2063	-30.525		71.2476	-32.487
71.2648	-33.971		71.2728	-34.586		71.2485	-36.215		71.2725	-37.862		71.2725	-37.862		71.256	-36.032		71.248	-30.523		71.2893	-32.485
71.3064	-33.971		71.3144	-34.585		71.2902	-36.215		71.3142	-37.861		71.3142	-37.861		71.2977	-36.031		71.2896	-30.52		71.331	-32.484
71.3481	-33.97		71.3561	-34.584		71.3318	-36.215		71.3559	-37.86		71.3559	-37.86		71.3393	-36.03		71.3313	-30.518		71.3726	-32.482
71.3898	-33.969		71.3978	-34.583		71.3735	-36.215		71.3975	-37.858		71.3975	-37.858		71.381	-36.029		71.3729	-30.516		71.4143	-32.48
71.4314	-33.967		71.4395	-34.582		71.4152	-36.214		71.4392	-37.856		71.4392	-37.856		71.4227	-36.028		71.4146	-30.513		71.456	-32.478
71.4731	-33.966		71.4811	-34.581		71.4568	-36.214		71.4809	-37.854		71.4809	-37.854		71.4643	-36.027		71.4563	-30.511		71.4976	-32.477
71.5148	-33.965		71.5228	-34.58		71.4985	-36.214		71.5225	-37.853		71.5225	-37.853		71.506	-36.026		71.498	-30.508		71.5393	-32.475
71.5564	-33.964		71.5645	-34.578		71.5401	-36.213		71.5642	-37.85		71.5642	-37.85		71.5477	-36.025		71.5396	-30.505		71.581	-32.473
71.5981	-33.962		71.6061	-34.576		71.5818	-36.213		71.6059	-37.848		71.6059	-37.848		71.5894	-36.023		71.5813	-30.502		71.6226	-32.471
71.6398	-33.961		71.6478	-34.575		71.6235	-36.213		71.6475	-37.846		71.6475	-37.846		71.631	-36.021		71.623	-30.499		71.6643	-32.469
71.6814	-33.96		71.6894	-34.573		71.6651	-36.212		71.6892	-37.844		71.6892	-37.844		71.6727	-36.019		71.6646	-30.497		71.706	-32.468
71.7231	-33.959		71.7311	-34.571		71.7068	-36.212		71.7309	-37.841		71.7309	-37.841		71.7144	-36.017		71.7063	-30.493		71.7476	-32.466
71.7648	-33.957		71.7728	-34.569		71.7485	-36.211		71.7725	-37.839		71.7725	-37.839		71.756	-36.015		71.748	-30.49		71.7893	-32.463
71.8064	-33.955		71.8144	-34.567		71.7902	-36.211		71.8142	-37.837		71.8142	-37.837		71.7977	-36.013		71.7896	-30.487		71.831	-32.461
71.8481	-33.953		71.8561	-34.565		71.8318	-36.21		71.8559	-37.835		71.8559	-37.835		71.8394	-36.012		71.8313	-30.484		71.8726	-32.459
71.8898	-33.951		71.8978	-34.563		71.8735	-36.21		71.8975	-37.833		71.8975	-37.833		71.881	-36.011		71.873	-30.48		71.9143	-32.456
71.9314	-33.948		71.9395	-34.561		71.9152	-36.209		71.9392	-37.83		71.9392	-37.83		71.9227	-36.009		71.9146	-30.477		71.956	-32.454
71.9731	-33.946		71.9811	-34.559		71.9568	-36.208		71.9809	-37.828		71.9809	-37.828		71.9643	-36.008		71.9563	-30.474		71.9976	-32.451
72.0148	-33.944		72.0228	-34.557		71.9985	-36.208		72.0225	-37.825		72.0225	-37.825		72.006	-36.006		71.998	-30.471		72.0393	-32.449
72.0564	-33.942		72.0645	-34.555		72.0402	-36.207		72.0642	-37.823		72.0642	-37.823		72.0477	-36.004		72.0396	-30.469		72.081	-32.447
72.0981	-33.94		72.1061	-34.553		72.0818	-36.207		72.1059	-37.821		72.1059	-37.821		72.0893	-36.002		72.0813	-30.466		72.1227	-32.445
72.1398	-33.939		72.1478	-34.551		72.1235	-36.206		72.1475	-37.818		72.1475	-37.818		72.131	-36		72.123	-30.463		72.1643	-32.443
72.1814	-33.937		72.1895	-34.549		72.1651	-36.206		72.1892	-37.816		72.1892	-37.816		72.1727	-35.999		72.1646	-30.46		72.206	-32.442
72.2231	-33.936		72.2311	-34.547		72.2068	-36.205		72.2309	-37.814		72.2309	-37.814		72.2144	-35.997		72.2063	-30.458		72.2476	-32.44
72.2648	-33.934		72.2728	-34.545		72.2485	-36.205		72.2725	-37.813		72.2725	-37.813		72.256	-35.996		72.248	-30.455		72.2893	-32.438
72.3064	-33.933		72.3145	-34.543		72.2901	-36.205		72.3142	-37.811		72.3142	-37.811		72.2977	-35.994		72.2896	-30.452		72.331	-32.437
72.3481	-33.932		72.3561	-34.541		72.3318	-36.204		72.3559	-37.809		72.3559	-37.809		72.3394	-35.993		72.3313	-30.449		72.3727	-32.435
72.3898	-33.93		72.3978	-34.54		72.3735	-36.204		72.3975	-37.808		72.3975	-37.808		72.381	-35.992		72.373	-30.446		72.4143	-32.434
72.4314	-33.929		72.4395	-34.538		72.4152	-36.203		72.4392	-37.806		72.4392	-37.806		72.4227	-35.99		72.4146	-30.443		72.456	-32.432
72.4731	-33.928		72.4811	-34.537		72.4568	-36.203		72.4809	-37.804		72.4809	-37.804		72.4644	-35.989		72.4563	-30.441		72.4977	-32.431
72.5148	-33.927		72.5228	-34.536		72.4985	-36.203		72.5225	-37.803		72.5225	-37.803		72.506	-35.988		72.498	-30.438		72.5393	-32.429
72.5564	-33.926		72.5645	-34.535		72.5402	-36.202		72.5642	-37.801		72.5642	-37.801		72.5477	-35.986		72.5396	-30.436		72.581	-32.428
72.5981	-33.925		72.6061	-34.533		72.5818	-36.202		72.6059	-37.8		72.6059	-37.8		72.5894	-35.985		72.5813	-30.434		72.6227	-32.427
72.6398	-33.924		72.6478	-34.532		72.6235	-36.202		72.6475	-37.799		72.6475	-37.799		72.631	-35.984		72.623	-30.432		72.6643	-32.426
72.6814	-33.923		72.6895	-34.531		72.6652	-36.202		72.6892	-37.797		72.6892	-37.797		72.6727	-35.982		72.6646	-30.43		72.706	-32.425
72.7231	-33.922		72.7311	-34.529		72.7068	-36.201		72.7309	-37.796		72.7309	-37.796		72.7144	-35.981		72.7063	-30.428		72.7477	-32.424
72.7648	-33.921		72.7728	-34.528		72.7485	-36.201		72.7725	-37.796		72.7725	-37.796		72.756	-35.98		72.748	-30.425		72.7893	-32.423
72.8064	-33.92		72.8145	-34.527		72.7902	-36.201		72.8142	-37.795		72.8142	-37.795		72.7977	-35.979		72.7896	-30.423		72.831	-32.423
72.8481	-33.92		72.8561	-34.526		72.8318	-36.201		72.8559	-37.794		72.8559	-37.794		72.8394	-35.979		72.8313	-30.421		72.8727	-32.422
72.8898	-33.919		72.8978	-34.525		72.8735	-36.201		72.8975	-37.793		72.8975	-37.793		72.881	-35.978		72.873	-30.419		72.9143	-32.421
72.9314	-33.918		72.9395	-34.524		72.9152	-36.2		72.9392	-37.792		72.9392	-37.792		72.9227	-35.977		72.9146	-30.418		72.956	-32.42
72.9731	-33.917		72.9811	-34.523		72.9568	-36.2		72.9809	-37.791		72.9809	-37.791		72.9644	-35.977		72.9563	-30.416		72.9977	-32.419
73.0148	-33.916		73.0228	-34.523		72.9985	-36.2		73.0225	-37.79		73.0225	-37.79		73.006	-35.976		72.998	-30.415		73.0393	-32.418
73.0564	-33.916		73.0645	-34.522		73.0402	-36.2		73.0642	-37.789		73.0642	-37.789		73.0477	-35.975		73.0396	-30.413		73.081	-32.417
73.0981	-33.915		73.1061	-34.522		73.0818	-36.2		73.1059	-37.788		73.1059	-37.788		73.0894	-35.975		73.0813	-30.412		73.1227	-32.417
73.1398	-33.914		73.1478	-34.521		73.1235	-36.2		73.1475	-37.787		73.1475	-37.787		73.131	-35.974		73.123	-30.411		73.1643	-32.416
73.1814	-33.914		73.1895	-34.52		73.1652	-36.199		73.1892	-37.787		73.1892	-37.787		73.1727	-35.973		73.1646	-30.41		73.206	-32.416
73.2231	-33.914		73.2311	-34.52		73.2068	-36.199		73.2309	-37.786		73.2309	-37.786		73.2144	-35.973		73.2063	-30.408		73.2477	-32.415
73.2648	-33.913		73.2728	-34.519		73.2485	-36.199		73.2809	-37.785		73.2809	-37.785		73.256	-35.973		73.248	-30.407		73.2894	-32.415
73.3148	-33.912		73.3145	-34.518		73.2902	-36.199		73.3225	-37.784		73.3225	-37.784		73.306	-35.972		73.2896	-30.406		73.331	-32.415
73.3565	-33.911		73.3561	-34.518		73.3318	-36.199		73.3642	-37.784		73.3642	-37.784		73.3477	-35.972		73.3313	-30.404		73.3727	-32.414
73.3981	-33.91		73.3978	-34.517		73.3735	-36.199		73.4059	-37.783		73.4059	-37.783		73.3894	-35.971		73.373	-30.403		73.4144	-32.414
73.4398	-33.91		73.4395	-34.516		73.4152	-36.199		73.4475	-37.782		73.4475	-37.782		73.431	-35.971		73.4146	-30.402		73.456	-32.413
73.4815	-33.909		73.4812	-34.516		73.4569	-36.199		73.4892	-37.781		73.4892	-37.781		73.4727	-35.97		73.4563	-30.401		73.4977	-32.412
73.5231	-33.908		73.5228	-34.515		73.4985	-36.198		73.5309	-37.78		73.5309	-37.78		73.5144	-35.97		73.498	-30.401		73.5394	-32.412
73.5648	-33.907		73.5645	-34.515		73.5402	-36.198		73.5725	-37.779		73.5725	-37.779		73.556	-35.969		73.5396	-30.4		73.581	-32.411
73.6065	-33.907		73.6061	-34.514		73.5819	-36.198		73.6142	-37.778		73.6142	-37.778		73.5977	-35.969		73.5813	-30.399		73.6227	-32.411
73.6481	-33.906		73.6478	-34.513		73.6235	-36.198		73.6559	-37.777		73.6559	-37.777		73.6394	-35.968		73.623	-30.398		73.6644	-32.41
73.6898	-33.906		73.6895	-34.512		73.6652	-36.198		73.6975	-37.776		73.6975	-37.776		73.681	-35.967		73.6646	-30.397		73.706	-32.41
73.7315	-33.905		73.7311	-34.511		73.7069	-36.198		73.7392	-37.775		73.7392	-37.775		73.7227	-35.966		73.7063	-30.396		73.7477	-32.409
73.7731	-33.904		73.7728	-34.51		73.7485	-36.198		73.7809	-37.775		73.7809	-37.775		73.7644	-35.966		73.748	-30.395		73.7894	-32.409
73.8148	-33.904		73.8145	-34.509		73.7902	-36.198		73.8226	-37.774		73.8226	-37.774		73.806	-35.965		73.7896	-30.395		73.831	-32.408
73.8565	-33.903		73.8561	-34.508		73.8319	-36.198		73.8642	-37.772		73.8642	-37.772		73.8477	-35.964		73.8313	-30.394		73.8727	-32.408
73.8981	-33.902		73.8978	-34.506		73.8735	-36.197		73.9059	-37.771		73.9059	-37.771		73.8894	-35.963		73.873	-30.393		73.9144	-32.407
73.9398	-33.901		73.9395	-34.505		73.9152	-36.197		73.9476	-37.77		73.9476	-37.77		73.931	-35.963		73.9146	-30.392		73.956	-32.406
73.9815	-33.9		73.9811	-34.503		73.9569	-36.197		73.9892	-37.768		73.9892	-37.768		73.9727	-35.962		73.9563	-30.391		73.9977	-32.406
74.0231	-33.899		74.0228	-34.502		73.9985	-36.197		74.0309	-37.766		74.0309	-37.766		74.0144	-35.961		73.998	-30.39		74.0394	-32.405
74.0648	-33.898		74.0645	-34.501		74.0402	-36.197		74.0726	-37.765		74.0726	-37.765		74.056	-35.96		74.0396	-30.389		74.081	-32.404
74.1065	-33.898		74.1061	-34.499		74.0819	-36.196		74.1142	-37.762		74.1142	-37.762		74.0977	-35.959		74.0813	-30.388		74.1227	-32.403
74.1481	-33.897		74.1478	-34.497		74.1235	-36.196		74.1559	-37.76		74.1559	-37.76		74.1394	-35.957		74.123	-30.387		74.1644	-32.403
74.1898	-33.896		74.1895	-34.495		74.1652	-36.196		74.1976	-37.758		74.1976	-37.758		74.181	-35.956		74.1646	-30.386		74.206	-32.402
74.2314	-33.895		74.2311	-34.492		74.2069	-36.196		74.2392	-37.756		74.2392	-37.756		74.2227	-35.954		74.2063	-30.384		74.2477	-32.401
74.2731	-33.894		74.2728	-34.49		74.2552	-36.195		74.2809	-37.755		74.2809	-37.755		74.2644	-35.953		74.248	-30.382		74.2894	-32.401
74.3148	-33.893		74.3145	-34.487		74.2969	-36.195		74.3226	-37.753		74.3226	-37.753		74.306	-35.951		74.2896	-30.38		74.331	-32.4
74.3565	-33.891		74.3561	-34.485		74.3385	-36.195		74.3642	-37.751		74.3642	-37.751		74.3477	-35.949		74.3313	-30.378		74.3727	-32.399
74.3981	-33.89		74.3978	-34.482		74.3802	-36.194		74.4059	-37.749		74.4059	-37.749		74.3894	-35.948		74.373	-30.376		74.4144	-32.398
74.4398	-33.888		74.4395	-34.479		74.4219	-36.194		74.4476	-37.746		74.4476	-37.746		74.431	-35.946		74.4147	-30.374		74.456	-32.397
74.4815	-33.886		74.4811	-34.477		74.4635	-36.193		74.4892	-37.743		74.4892	-37.743		74.4727	-35.944		74.4563	-30.372		74.4977	-32.396
74.5231	-33.885		74.5228	-34.474		74.5052	-36.192		74.5309	-37.741		74.5309	-37.741		74.5144	-35.942		74.498	-30.37		74.5394	-32.395
74.5648	-33.884		74.5645	-34.47		74.5469	-36.192		74.5726	-37.737		74.5726	-37.737		74.556	-35.94		74.5397	-30.368		74.581	-32.394
74.6065	-33.882		74.6061	-34.467		74.5885	-36.191		74.6142	-37.735		74.6142	-37.735		74.5977	-35.937		74.5813	-30.367		74.6227	-32.393
74.6481	-33.881		74.6478	-34.464		74.6302	-36.19		74.6559	-37.732		74.6559	-37.732		74.6394	-35.935		74.623	-30.364		74.6644	-32.393
74.6898	-33.879		74.6895	-34.459		74.6719	-36.188		74.6976	-37.729		74.6976	-37.729		74.681	-35.932		74.6647	-30.362		74.7061	-32.392
74.7315	-33.878		74.7312	-34.455		74.7135	-36.187		74.7392	-37.726		74.7392	-37.726		74.7227	-35.929		74.7063	-30.36		74.7477	-32.391
74.7731	-33.876		74.7728	-34.45		74.7552	-36.186		74.7809	-37.723		74.7809	-37.723		74.7644	-35.927		74.748	-30.357		74.7894	-32.39
74.8148	-33.873		74.8145	-34.446		74.7969	-36.185		74.8226	-37.72		74.8226	-37.72		74.806	-35.924		74.7897	-30.354		74.831	-32.389
74.8565	-33.871		74.8561	-34.442		74.8385	-36.183		74.8642	-37.717		74.8642	-37.717		74.8477	-35.921		74.8313	-30.351		74.8727	-32.388
74.8981	-33.868		74.8978	-34.438		74.8802	-36.182		74.9059	-37.713		74.9059	-37.713		74.8894	-35.919		74.873	-30.348		74.9144	-32.387
74.9398	-33.865		74.9395	-34.434		74.9219	-36.18		74.9476	-37.71		74.9476	-37.71		74.931	-35.916		74.9147	-30.345		74.956	-32.385
74.9814	-33.862		74.9812	-34.43		74.9635	-36.177		74.9892	-37.706		74.9892	-37.706		74.9727	-35.913		74.9563	-30.342		74.9977	-32.384
75.0231	-33.859		75.0228	-34.426		75.0052	-36.175		75.0309	-37.702		75.0309	-37.702		75.0144	-35.911		74.998	-30.339		75.0394	-32.383
75.0648	-33.856		75.0645	-34.421		75.0469	-36.172		75.0726	-37.698		75.0726	-37.698		75.056	-35.907		75.0397	-30.336		75.081	-32.381
75.1065	-33.853		75.1062	-34.416		75.0885	-36.169		75.1142	-37.693		75.1142	-37.693		75.0977	-35.904		75.0813	-30.332		75.1227	-32.38
75.1481	-33.85		75.1478	-34.411		75.1302	-36.166		75.1559	-37.69		75.1559	-37.69		75.1394	-35.9		75.123	-30.329		75.1644	-32.379
75.1898	-33.847		75.1895	-34.406		75.1719	-36.163		75.1976	-37.686		75.1976	-37.686		75.181	-35.897		75.1647	-30.326		75.206	-32.377
75.2314	-33.843		75.2311	-34.401		75.2135	-36.161		75.2392	-37.682		75.2392	-37.682		75.2227	-35.894		75.2063	-30.322		75.2477	-32.376
75.2731	-33.84		75.2728	-34.396		75.2552	-36.158		75.2809	-37.679		75.2809	-37.679		75.2644	-35.891		75.248	-30.318		75.2894	-32.375
75.3148	-33.836		75.3145	-34.391		75.2969	-36.155		75.3226	-37.675		75.3226	-37.675		75.306	-35.888		75.2897	-30.315		75.331	-32.373
75.3564	-33.83		75.3562	-34.386		75.3385	-36.152		75.3642	-37.67		75.3642	-37.67		75.3477	-35.885		75.3313	-30.311		75.3727	-32.372
75.3981	-33.824		75.3978	-34.381		75.3802	-36.148		75.4059	-37.666		75.4059	-37.666		75.3894	-35.882		75.373	-30.307		75.4144	-32.37
75.4398	-33.819		75.4395	-34.376		75.4219	-36.144		75.4476	-37.662		75.4476	-37.662		75.431	-35.879		75.4147	-30.304		75.456	-32.369
75.4815	-33.815		75.4812	-34.37		75.4635	-36.14		75.4892	-37.657		75.4892	-37.657		75.4727	-35.876		75.4563	-30.301		75.4977	-32.367
75.5231	-33.81		75.5228	-34.365		75.5052	-36.137		75.5309	-37.653		75.5309	-37.653		75.5144	-35.872		75.498	-30.297		75.5394	-32.365
75.5648	-33.805		75.5645	-34.359		75.5469	-36.133		75.5726	-37.648		75.5726	-37.648		75.556	-35.868		75.5397	-30.294		75.5811	-32.364
75.6065	-33.801		75.6062	-34.353		75.5885	-36.129		75.6142	-37.644		75.6142	-37.644		75.5977	-35.864		75.5813	-30.29		75.6227	-32.362
75.6481	-33.797		75.6478	-34.347		75.6302	-36.126		75.6559	-37.64		75.6559	-37.64		75.6394	-35.86		75.623	-30.287		75.6644	-32.361
75.6898	-33.792		75.6895	-34.34		75.6719	-36.122		75.6976	-37.637		75.6976	-37.637		75.681	-35.855		75.6647	-30.283		75.706	-32.359
75.7315	-33.788		75.7312	-34.334		75.7135	-36.118		75.7392	-37.633		75.7392	-37.633		75.7227	-35.851		75.7063	-30.278		75.7477	-32.358
75.7731	-33.783		75.7728	-34.328		75.7552	-36.114		75.7809	-37.629		75.7809	-37.629		75.7644	-35.847		75.7563	-30.273		75.7894	-32.357
75.8148	-33.778		75.8145	-34.323		75.7969	-36.11		75.8226	-37.625		75.8226	-37.625		75.806	-35.843		75.8047	-30.267		75.831	-32.355
75.8565	-33.772		75.8562	-34.317		75.8385	-36.106		75.8642	-37.62		75.8642	-37.62		75.8477	-35.839		75.8463	-30.263		75.8727	-32.353
75.8981	-33.766		75.8978	-34.311		75.8802	-36.101		75.9059	-37.616		75.9059	-37.616		75.8894	-35.835		75.888	-30.258		75.9144	-32.351
75.9398	-33.761		75.9395	-34.305		75.9219	-36.095		75.9476	-37.611		75.9476	-37.611		75.9311	-35.831		75.9297	-30.253		75.956	-32.349
75.9815	-33.756		75.9812	-34.299		75.9635	-36.09		75.9892	-37.606		75.9892	-37.606		75.9727	-35.826		75.9713	-30.248		75.9977	-32.346
76.0231	-33.751		76.0228	-34.293		76.0052	-36.084		76.0309	-37.601		76.0309	-37.601		76.0144	-35.821		76.013	-30.243		76.0394	-32.344
76.0648	-33.747		76.0645	-34.286		76.0469	-36.079		76.0726	-37.597		76.0726	-37.597		76.0561	-35.816		76.0547	-30.238		76.081	-32.342
76.1065	-33.743		76.1062	-34.279		76.0885	-36.074		76.1142	-37.593		76.1142	-37.593		76.0977	-35.81		76.0963	-30.232		76.1227	-32.34
76.1481	-33.739		76.1478	-34.273		76.1302	-36.069		76.1559	-37.589		76.1559	-37.589		76.1394	-35.805		76.138	-30.226		76.1644	-32.338
76.1898	-33.734		76.1895	-34.267		76.1719	-36.064		76.1976	-37.584		76.1976	-37.584		76.181	-35.8		76.1796	-30.221		76.206	-32.335
76.2315	-33.729		76.2312	-34.261		76.2135	-36.059		76.2392	-37.58		76.2392	-37.58		76.2227	-35.795		76.2213	-30.215		76.2477	-32.333
76.2731	-33.723		76.2729	-34.254		76.2552	-36.054		76.2809	-37.575		76.2809	-37.575		76.2644	-35.79		76.263	-30.21		76.2894	-32.331
76.3148	-33.717		76.3145	-34.248		76.2969	-36.049		76.3226	-37.57		76.3226	-37.57		76.3061	-35.785		76.3047	-30.204		76.331	-32.329
76.3565	-33.711		76.3562	-34.241		76.3385	-36.043		76.3642	-37.564		76.3642	-37.564		76.3477	-35.78		76.3463	-30.199		76.3727	-32.327
76.3981	-33.704		76.3978	-34.234		76.3802	-36.037		76.4059	-37.559		76.4059	-37.559		76.3894	-35.774		76.388	-30.193		76.4144	-32.325
76.4398	-33.698		76.4395	-34.227		76.4219	-36.031		76.4476	-37.553		76.4476	-37.553		76.4311	-35.768		76.4297	-30.189		76.456	-32.323
76.4815	-33.694		76.4812	-34.219		76.4635	-36.025		76.4892	-37.548		76.4892	-37.548		76.4727	-35.762		76.4713	-30.184		76.4977	-32.321
76.5231	-33.689		76.5229	-34.211		76.5052	-36.019		76.5309	-37.542		76.5309	-37.542		76.5144	-35.756		76.513	-30.178		76.5394	-32.319
76.5648	-33.684		76.5645	-34.204		76.5469	-36.013		76.5726	-37.537		76.5726	-37.537		76.5561	-35.75		76.5547	-30.173		76.581	-32.316
76.6065	-33.68		76.6062	-34.196		76.5885	-36.008		76.6142	-37.532		76.6142	-37.532		76.5977	-35.744		76.5963	-30.166		76.6227	-32.314
76.6481	-33.674		76.6478	-34.189		76.6302	-36.001		76.6559	-37.526		76.6559	-37.526		76.6394	-35.738		76.638	-30.16		76.6644	-32.311
76.6898	-33.667		76.6895	-34.183		76.6719	-35.995		76.6976	-37.521		76.6976	-37.521		76.6811	-35.732		76.6797	-30.154		76.706	-32.309
76.7315	-33.661		76.7312	-34.176		76.7135	-35.989		76.7392	-37.515		76.7392	-37.515		76.7227	-35.726		76.7214	-30.149		76.7477	-32.306
76.7731	-33.654		76.7728	-34.169		76.7552	-35.982		76.7809	-37.509		76.7809	-37.509		76.7644	-35.721		76.763	-30.143		76.7894	-32.303
76.8148	-33.647		76.8145	-34.161		76.7969	-35.974		76.8226	-37.503		76.8226	-37.503		76.8061	-35.714		76.8047	-30.137		76.831	-32.3
76.8565	-33.64		76.8562	-34.153		76.8385	-35.966		76.8642	-37.496		76.8642	-37.496		76.8477	-35.708		76.8464	-30.132		76.8727	-32.297
76.8981	-33.633		76.8978	-34.144		76.8802	-35.959		76.9059	-37.49		76.9059	-37.49		76.8894	-35.701		76.888	-30.126		76.9144	-32.293
76.9398	-33.626		76.9395	-34.136		76.9219	-35.953		76.9476	-37.484		76.9476	-37.484		76.9311	-35.694		76.9297	-30.12		76.956	-32.29
76.9815	-33.62		76.9812	-34.129		76.9635	-35.946		76.9892	-37.478		76.9892	-37.478		76.9727	-35.687		76.9714	-30.114		76.9977	-32.287
77.0231	-33.613		77.0228	-34.121		77.0052	-35.94		77.0309	-37.472		77.0309	-37.472		77.0144	-35.68		77.013	-30.107		77.0394	-32.283
77.0648	-33.607		77.0645	-34.113		77.0469	-35.934		77.0726	-37.467		77.0726	-37.467		77.0561	-35.674		77.0547	-30.1		77.081	-32.28
77.1065	-33.6		77.1128	-34.105		77.0885	-35.927		77.1142	-37.462		77.1142	-37.462		77.0977	-35.667		77.0964	-30.093		77.1227	-32.277
77.1481	-33.593		77.1545	-34.096		77.1302	-35.92		77.1559	-37.456		77.1559	-37.456		77.1394	-35.661		77.138	-30.086		77.1644	-32.274
77.1898	-33.585		77.1962	-34.088		77.1719	-35.913		77.1976	-37.451		77.1976	-37.451		77.1811	-35.655		77.1797	-30.08		77.206	-32.271
77.2315	-33.577		77.2378	-34.08		77.2136	-35.906		77.2392	-37.445		77.2392	-37.445		77.2227	-35.648		77.2214	-30.073		77.2477	-32.268
77.2731	-33.568		77.2795	-34.071		77.2552	-35.899		77.2809	-37.44		77.2809	-37.44		77.2644	-35.641		77.263	-30.067		77.2894	-32.265
77.3148	-33.561		77.3212	-34.062		77.2969	-35.892		77.3226	-37.435		77.3226	-37.435		77.3061	-35.635		77.3047	-30.061		77.331	-32.261
77.3565	-33.554		77.3628	-34.054		77.3386	-35.885		77.3642	-37.43		77.3642	-37.43		77.3477	-35.628		77.3464	-30.055		77.3727	-32.257
77.3981	-33.548		77.4045	-34.045		77.3802	-35.878		77.4059	-37.426		77.4059	-37.426		77.3894	-35.621		77.388	-30.049		77.4144	-32.254
77.4398	-33.541		77.4462	-34.037		77.4219	-35.871		77.4476	-37.422		77.4476	-37.422		77.4311	-35.613		77.4297	-30.043		77.456	-32.25
77.4815	-33.535		77.4878	-34.028		77.4635	-35.864		77.4892	-37.418		77.4892	-37.418		77.4727	-35.607		77.4714	-30.036		77.4977	-32.245
77.5231	-33.53		77.5295	-34.021		77.5052	-35.857		77.5309	-37.415		77.5309	-37.415		77.5144	-35.6		77.513	-30.03		77.5394	-32.241
77.5648	-33.524		77.5712	-34.013		77.5469	-35.85		77.5726	-37.411		77.5726	-37.411		77.5561	-35.594		77.5547	-30.024		77.581	-32.237
77.6131	-33.518		77.6128	-34.004		77.5885	-35.842		77.6142	-37.407		77.6142	-37.407		77.5977	-35.587		77.5964	-30.018		77.6227	-32.233
77.6548	-33.513		77.6545	-33.995		77.6302	-35.833		77.6559	-37.404		77.6559	-37.404		77.6394	-35.581		77.638	-30.012		77.6644	-32.229
77.6965	-33.508		77.6962	-33.986		77.6719	-35.824		77.6976	-37.4		77.6976	-37.4		77.6811	-35.575		77.6797	-30.007		77.706	-32.224
77.7382	-33.502		77.7378	-33.978		77.7135	-35.816		77.7392	-37.397		77.7392	-37.397		77.7294	-35.567		77.7214	-30.001		77.7477	-32.22
77.7798	-33.497		77.7795	-33.97		77.7552	-35.808		77.7809	-37.393		77.7809	-37.393		77.7711	-35.561		77.763	-29.995		77.796	-32.214
77.8215	-33.492		77.8212	-33.962		77.7969	-35.801		77.8226	-37.39		77.8226	-37.39		77.8127	-35.554		77.8047	-29.989		77.8377	-32.209
77.8631	-33.485		77.8628	-33.954		77.8385	-35.794		77.8642	-37.387		77.8642	-37.387		77.8544	-35.548		77.8464	-29.982		77.8794	-32.204
77.9048	-33.479		77.9045	-33.946		77.8802	-35.787		77.9059	-37.384		77.9059	-37.384		77.8961	-35.542		77.888	-29.976		77.921	-32.199
77.9465	-33.473		77.9462	-33.938		77.9219	-35.779		77.9476	-37.382		77.9476	-37.382		77.9377	-35.536		77.9297	-29.97		77.9627	-32.195
77.9882	-33.466		77.9878	-33.93		77.9635	-35.772		77.9892	-37.379		77.9892	-37.379		77.9794	-35.53		77.9714	-29.964		78.0044	-32.19
78.0298	-33.459		78.0295	-33.922		78.0052	-35.764		78.0309	-37.377		78.0309	-37.377		78.0211	-35.525		78.013	-29.958		78.046	-32.186
78.0715	-33.452		78.0712	-33.912		78.0469	-35.755		78.0726	-37.374		78.0726	-37.374		78.0627	-35.518		78.0547	-29.953		78.0877	-32.182
78.1132	-33.445		78.1128	-33.903		78.0885	-35.748		78.1142	-37.371		78.1142	-37.371		78.1044	-35.512		78.0964	-29.948		78.1294	-32.178
78.1548	-33.439		78.1545	-33.894		78.1302	-35.74		78.1559	-37.368		78.1559	-37.368		78.1461	-35.506		78.138	-29.943		78.171	-32.173
78.1965	-33.434		78.1962	-33.886		78.1719	-35.732		78.1976	-37.366		78.1976	-37.366		78.1877	-35.499		78.1797	-29.938		78.2127	-32.169
78.2382	-33.428		78.2379	-33.878		78.2135	-35.725		78.2392	-37.363		78.2392	-37.363		78.2294	-35.492		78.2214	-29.932		78.2544	-32.164
78.2798	-33.421		78.2795	-33.869		78.2552	-35.719		78.2809	-37.36		78.2809	-37.36		78.2711	-35.485		78.263	-29.927		78.296	-32.158
78.3215	-33.415		78.3212	-33.861		78.2969	-35.711		78.3226	-37.357		78.3226	-37.357		78.3127	-35.478		78.3047	-29.921		78.3377	-32.153
78.3632	-33.408		78.3629	-33.852		78.3386	-35.703		78.3642	-37.355		78.3642	-37.355		78.3544	-35.472		78.3464	-29.916		78.3794	-32.147
78.4048	-33.401		78.4045	-33.844		78.3802	-35.695		78.4059	-37.351		78.4059	-37.351		78.3961	-35.466		78.388	-29.911		78.421	-32.142
78.4465	-33.395		78.4462	-33.836		78.4219	-35.687		78.4476	-37.348		78.4476	-37.348		78.4378	-35.46		78.4297	-29.905		78.4627	-32.136
78.4882	-33.389		78.4878	-33.827		78.4636	-35.679		78.4892	-37.345		78.4892	-37.345		78.4794	-35.454		78.4714	-29.9		78.5044	-32.131
78.5298	-33.384		78.5295	-33.819		78.5052	-35.67		78.5309	-37.341		78.5309	-37.341		78.5211	-35.448		78.513	-29.895		78.546	-32.126
78.5715	-33.379		78.5712	-33.81		78.5469	-35.662		78.5726	-37.336		78.5726	-37.336		78.5628	-35.442		78.5547	-29.89		78.5877	-32.12
78.6132	-33.374		78.6128	-33.802		78.5885	-35.653		78.6142	-37.332		78.6142	-37.332		78.6044	-35.436		78.5964	-29.885		78.6294	-32.114
78.6548	-33.369		78.6545	-33.795		78.6302	-35.646		78.6559	-37.326		78.6559	-37.326		78.6461	-35.43		78.638	-29.88		78.671	-32.108
78.6965	-33.365		78.6962	-33.787		78.6719	-35.64		78.6976	-37.32		78.6976	-37.32		78.6877	-35.423		78.6797	-29.874		78.7127	-32.102
78.7382	-33.36		78.7378	-33.778		78.7135	-35.633		78.7392	-37.314		78.7392	-37.314		78.7294	-35.417		78.7214	-29.868		78.7544	-32.096
78.7798	-33.356		78.7795	-33.77		78.7552	-35.625		78.7809	-37.307		78.7809	-37.307		78.7711	-35.411		78.763	-29.862		78.796	-32.09
78.8215	-33.351		78.8212	-33.761		78.7969	-35.618		78.8226	-37.301		78.8226	-37.301		78.8127	-35.406		78.8047	-29.856		78.8377	-32.083
78.8632	-33.345		78.8628	-33.752		78.8386	-35.609		78.8642	-37.295		78.8642	-37.295		78.8544	-35.4		78.8464	-29.85		78.8794	-32.077
78.9048	-33.339		78.9045	-33.743		78.8802	-35.6		78.9059	-37.289		78.9059	-37.289		78.8961	-35.394		78.888	-29.844		78.9211	-32.071
78.9465	-33.332		78.9462	-33.733		78.9219	-35.592		78.9543	-37.282		78.9543	-37.282		78.9378	-35.388		78.9297	-29.838		78.9627	-32.064
78.9882	-33.324		78.9879	-33.724		78.9636	-35.584		78.9959	-37.275		78.9959	-37.275		78.9794	-35.382		78.9714	-29.833		79.0044	-32.058
79.0298	-33.316		79.0295	-33.714		79.0052	-35.577		79.0376	-37.268		79.0376	-37.268		79.0211	-35.376		79.013	-29.828		79.046	-32.051
79.0715	-33.309		79.0712	-33.706		79.0469	-35.57		79.0793	-37.26		79.0793	-37.26		79.0628	-35.369		79.0547	-29.823		79.0877	-32.044
79.1132	-33.304		79.1129	-33.698		79.0885	-35.563		79.1209	-37.253		79.1209	-37.253		79.1044	-35.362		79.0964	-29.817		79.1294	-32.037
79.1548	-33.298		79.1545	-33.689		79.1302	-35.555		79.1626	-37.246		79.1626	-37.246		79.1461	-35.355		79.138	-29.812		79.171	-32.029
79.1965	-33.292		79.1962	-33.681		79.1719	-35.548		79.2043	-37.239		79.2043	-37.239		79.1878	-35.349		79.1797	-29.806		79.2127	-32.022
79.2382	-33.287		79.2379	-33.672		79.2136	-35.541		79.2459	-37.233		79.2459	-37.233		79.2294	-35.342		79.2214	-29.801		79.2544	-32.015
79.2798	-33.281		79.2795	-33.662		79.2552	-35.532		79.2876	-37.226		79.2876	-37.226		79.2711	-35.336		79.263	-29.795		79.296	-32.009
79.3215	-33.274		79.3212	-33.653		79.2969	-35.523		79.3293	-37.219		79.3293	-37.219		79.3128	-35.331		79.3047	-29.79		79.3377	-32.002
79.3632	-33.268		79.3629	-33.644		79.3386	-35.514		79.3709	-37.212		79.3709	-37.212		79.3544	-35.325		79.3464	-29.784		79.3794	-31.995
79.4048	-33.262		79.4045	-33.635		79.3802	-35.505		79.4126	-37.204		79.4126	-37.204		79.3961	-35.319		79.388	-29.779		79.421	-31.989
79.4465	-33.256		79.4462	-33.627		79.4219	-35.497		79.4542	-37.196		79.4542	-37.196		79.4378	-35.312		79.4297	-29.774		79.4627	-31.982
79.4882	-33.249		79.4879	-33.618		79.4636	-35.489		79.4959	-37.188		79.4959	-37.188		79.4794	-35.306		79.4714	-29.769		79.5044	-31.975
79.5298	-33.242		79.5295	-33.609		79.5052	-35.481		79.5376	-37.18		79.5376	-37.18		79.5211	-35.3		79.513	-29.764		79.546	-31.967
79.5715	-33.236		79.5712	-33.6		79.5469	-35.474		79.5792	-37.172		79.5792	-37.172		79.5628	-35.295		79.5547	-29.758		79.5877	-31.96
79.6132	-33.229		79.6129	-33.591		79.5886	-35.465		79.6209	-37.163		79.6209	-37.163		79.6044	-35.289		79.5964	-29.753		79.6294	-31.953
79.6548	-33.223		79.6545	-33.581		79.6302	-35.457		79.6626	-37.155		79.6626	-37.155		79.6461	-35.283		79.6381	-29.747		79.671	-31.947
79.6965	-33.216		79.6962	-33.571		79.6719	-35.448		79.7042	-37.147		79.7042	-37.147		79.6878	-35.278		79.6797	-29.741		79.7127	-31.94
79.7382	-33.209		79.7379	-33.561		79.7136	-35.44		79.7459	-37.139		79.7459	-37.139		79.7294	-35.272		79.7214	-29.735		79.7544	-31.934
79.7798	-33.203		79.7795	-33.551		79.7552	-35.432		79.7876	-37.13		79.7876	-37.13		79.7711	-35.265		79.763	-29.729		79.7961	-31.927
79.8215	-33.196		79.8212	-33.541		79.7969	-35.424		79.8292	-37.12		79.8292	-37.12		79.8128	-35.259		79.8047	-29.723		79.8377	-31.921
79.8632	-33.19		79.8628	-33.531		79.8386	-35.416		79.8709	-37.11		79.8709	-37.11		79.8544	-35.253		79.8464	-29.718		79.8794	-31.914
79.9048	-33.184		79.9045	-33.522		79.8802	-35.409		79.9126	-37.099		79.9126	-37.099		79.8961	-35.245		79.888	-29.713		79.921	-31.908
79.9465	-33.178		79.9462	-33.514		79.9219	-35.401		79.9543	-37.088		79.9543	-37.088		79.9378	-35.238		79.9297	-29.708		79.9627	-31.901
79.9882	-33.172		79.9879	-33.504		79.9636	-35.393		79.9959	-37.078		79.9959	-37.078		79.9794	-35.231		79.9714	-29.702		80.0044	-31.895
80.0298	-33.165		80.0295	-33.494		80.0052	-35.385		80.0376	-37.068		80.0376	-37.068		80.0211	-35.224		80.0131	-29.696		80.046	-31.888
80.0715	-33.158		80.0712	-33.484		80.0486	-35.376		80.0793	-37.059		80.0793	-37.059		80.0628	-35.218		80.0547	-29.691		80.0877	-31.882
80.1132	-33.15		80.1129	-33.474		80.0902	-35.367		80.1209	-37.049		80.1209	-37.049		80.1044	-35.211		80.0964	-29.685		80.1294	-31.876
80.1548	-33.141		80.1545	-33.464		80.1319	-35.358		80.1626	-37.038		80.1626	-37.038		80.1461	-35.205		80.1381	-29.68		80.171	-31.869
80.1965	-33.131		80.1962	-33.455		80.1736	-35.35		80.2043	-37.028		80.2043	-37.028		80.1878	-35.199		80.1797	-29.674		80.2127	-31.863
80.2382	-33.121		80.2379	-33.445		80.2152	-35.341		80.2459	-37.018		80.2459	-37.018		80.2294	-35.193		80.2214	-29.669		80.2544	-31.856
80.2798	-33.111		80.2795	-33.436		80.2569	-35.334		80.2876	-37.007		80.2876	-37.007		80.2711	-35.187		80.2631	-29.664		80.296	-31.85
80.3215	-33.102		80.3212	-33.426		80.2986	-35.327		80.3293	-36.997		80.3293	-36.997		80.3128	-35.179		80.3047	-29.658		80.3377	-31.843
80.3632	-33.094		80.3629	-33.416		80.3402	-35.319		80.3709	-36.988		80.3709	-36.988		80.3544	-35.172		80.3464	-29.653		80.3794	-31.836
80.4048	-33.086		80.4045	-33.406		80.3819	-35.312		80.4126	-36.979		80.4126	-36.979		80.3961	-35.166		80.3881	-29.647		80.421	-31.829
80.4465	-33.078		80.4462	-33.396		80.4236	-35.303		80.4543	-36.972		80.4543	-36.972		80.4378	-35.159		80.4297	-29.641		80.4627	-31.822
80.4882	-33.07		80.4879	-33.385		80.4652	-35.295		80.4959	-36.964		80.4959	-36.964		80.4794	-35.153		80.4714	-29.635		80.5044	-31.816
80.5298	-33.062		80.5295	-33.375		80.5069	-35.286		80.5376	-36.957		80.5376	-36.957		80.5211	-35.147		80.5131	-29.628		80.546	-31.809
80.5715	-33.055		80.5712	-33.365		80.5486	-35.278		80.5793	-36.95		80.5793	-36.95		80.5628	-35.141		80.5547	-29.622		80.5877	-31.803
80.6132	-33.049		80.6129	-33.355		80.5902	-35.269		80.6209	-36.943		80.6209	-36.943		80.6044	-35.135		80.5964	-29.615		80.6294	-31.797
80.6548	-33.042		80.6545	-33.346		80.6319	-35.262		80.6626	-36.936		80.6626	-36.936		80.6461	-35.128		80.6381	-29.609		80.671	-31.791
80.6965	-33.035		80.6962	-33.337		80.6736	-35.254		80.7043	-36.929		80.7043	-36.929		80.6878	-35.122		80.6797	-29.603		80.7127	-31.785
80.7382	-33.029		80.7379	-33.329		80.7152	-35.247		80.7459	-36.922		80.7459	-36.922		80.7294	-35.115		80.7214	-29.598		80.7544	-31.779
80.7798	-33.023		80.7796	-33.32		80.7569	-35.239		80.7876	-36.916		80.7876	-36.916		80.7711	-35.107		80.7631	-29.592		80.796	-31.773
80.8215	-33.016		80.8212	-33.31		80.7986	-35.231		80.8293	-36.909		80.8293	-36.909		80.8128	-35.1		80.8047	-29.586		80.8377	-31.766
80.8632	-33.009		80.8629	-33.301		80.8402	-35.223		80.8709	-36.903		80.8709	-36.903		80.8544	-35.093		80.8464	-29.58		80.8794	-31.759
80.9048	-33.001		80.9046	-33.291		80.8819	-35.214		80.9126	-36.896		80.9126	-36.896		80.8961	-35.087		80.8881	-29.574		80.921	-31.752
80.9465	-32.993		80.9462	-33.283		80.9236	-35.206		80.9543	-36.89		80.9543	-36.89		80.9378	-35.08		80.9297	-29.567		80.9627	-31.745
80.9882	-32.984		80.9879	-33.274		80.9652	-35.197		80.9959	-36.883		80.9959	-36.883		80.9794	-35.074		80.9714	-29.56		81.0044	-31.739
81.0298	-32.975		81.0296	-33.265		81.0069	-35.188		81.0376	-36.876		81.0376	-36.876		81.0211	-35.068		81.0131	-29.554		81.046	-31.733
81.0715	-32.967		81.0712	-33.256		81.0486	-35.18		81.0793	-36.868		81.0793	-36.868		81.0628	-35.062		81.0547	-29.548		81.0877	-31.726
81.1132	-32.961		81.1129	-33.248		81.0919	-35.172		81.1209	-36.859		81.1209	-36.859		81.1044	-35.056		81.0964	-29.542		81.1294	-31.72
81.1548	-32.955		81.1546	-33.239		81.1336	-35.165		81.1626	-36.851		81.1626	-36.851		81.1461	-35.05		81.1381	-29.536		81.171	-31.713
81.1965	-32.95		81.1962	-33.229		81.1753	-35.157		81.2043	-36.843		81.2043	-36.843		81.1878	-35.043		81.1797	-29.53		81.2127	-31.706
81.2382	-32.944		81.2379	-33.219		81.2169	-35.148		81.2459	-36.835		81.2459	-36.835		81.2294	-35.037		81.2214	-29.523		81.2544	-31.698
81.2798	-32.938		81.2796	-33.209		81.2586	-35.139		81.2876	-36.828		81.2876	-36.828		81.2711	-35.031		81.2631	-29.517		81.2961	-31.691
81.3215	-32.931		81.3212	-33.199		81.3003	-35.131		81.3293	-36.82		81.3293	-36.82		81.3128	-35.025		81.3047	-29.51		81.3377	-31.684
81.3632	-32.923		81.3629	-33.189		81.3419	-35.124		81.3709	-36.812		81.3709	-36.812		81.3544	-35.019		81.3464	-29.503		81.3794	-31.677
81.4048	-32.915		81.4046	-33.18		81.3836	-35.116		81.4126	-36.804		81.4126	-36.804		81.3961	-35.014		81.3881	-29.496		81.4211	-31.671
81.4465	-32.907		81.4462	-33.171		81.4253	-35.108		81.4543	-36.795		81.4543	-36.795		81.4378	-35.008		81.4297	-29.489		81.4627	-31.665
81.4882	-32.9		81.4879	-33.163		81.4669	-35.1		81.4959	-36.786		81.4959	-36.786		81.4794	-35.002		81.4714	-29.483		81.5044	-31.659
81.5298	-32.892		81.5296	-33.154		81.5086	-35.093		81.5376	-36.778		81.5376	-36.778		81.5211	-34.996		81.5131	-29.478		81.5461	-31.653
81.5715	-32.885		81.5712	-33.146		81.5503	-35.085		81.5793	-36.769		81.5793	-36.769		81.5628	-34.99		81.5547	-29.473		81.5877	-31.648
81.6132	-32.878		81.6129	-33.137		81.5919	-35.078		81.6209	-36.76		81.6209	-36.76		81.6044	-34.984		81.5964	-29.468		81.6294	-31.642
81.6548	-32.869		81.6546	-33.128		81.6336	-35.067		81.6626	-36.753		81.6626	-36.753		81.6461	-34.977		81.6381	-29.463		81.671	-31.636
81.6965	-32.862		81.6962	-33.119		81.6752	-35.056		81.7043	-36.745		81.7043	-36.745		81.6878	-34.97		81.6797	-29.457		81.7127	-31.63
81.7382	-32.854		81.7379	-33.11		81.7169	-35.044		81.7459	-36.737		81.7459	-36.737		81.7294	-34.964		81.7214	-29.451		81.7544	-31.624
81.7799	-32.846		81.7796	-33.102		81.7586	-35.034		81.7876	-36.728		81.7876	-36.728		81.7711	-34.957		81.7631	-29.445		81.796	-31.619
81.8215	-32.837		81.8212	-33.094		81.8003	-35.024		81.8293	-36.719		81.8293	-36.719		81.8128	-34.951		81.8047	-29.439		81.8377	-31.614
81.8632	-32.829		81.8629	-33.087		81.8419	-35.015		81.8709	-36.71		81.8709	-36.71		81.8544	-34.945		81.8464	-29.433		81.8794	-31.609
81.9048	-32.821		81.9046	-33.079		81.8836	-35.008		81.9126	-36.701		81.9126	-36.701		81.8961	-34.939		81.8881	-29.427		81.921	-31.604
81.9465	-32.814		81.9462	-33.071		81.9253	-35.001		81.9543	-36.692		81.9543	-36.692		81.9378	-34.933		81.9297	-29.421		81.9627	-31.599
81.9882	-32.807		81.9879	-33.063		81.9669	-34.994		81.9959	-36.685		81.9959	-36.685		81.9794	-34.927		81.9714	-29.416		82.0044	-31.594
82.0299	-32.8		82.0296	-33.054		82.0086	-34.988		82.0376	-36.677		82.0376	-36.677		82.0211	-34.921		82.0131	-29.41		82.046	-31.588
82.0715	-32.792		82.0712	-33.045		82.0503	-34.981		82.0793	-36.669		82.0793	-36.669		82.0628	-34.914		82.0547	-29.404		82.0877	-31.583
82.1132	-32.785		82.1129	-33.036		82.0919	-34.975		82.1209	-36.662		82.1209	-36.662		82.1044	-34.908		82.0964	-29.398		82.1294	-31.577
82.1549	-32.777		82.1546	-33.028		82.1336	-34.969		82.1626	-36.655		82.1626	-36.655		82.1461	-34.903		82.1381	-29.392		82.171	-31.572
82.1965	-32.768		82.1962	-33.02		82.1753	-34.964		82.2043	-36.648		82.2043	-36.648		82.1878	-34.897		82.1797	-29.385		82.2127	-31.567
82.2382	-32.759		82.2379	-33.012		82.2169	-34.958		82.246	-36.641		82.246	-36.641		82.2294	-34.892		82.2214	-29.379		82.2544	-31.562
82.2798	-32.75		82.2796	-33.004		82.2586	-34.953		82.2876	-36.633		82.2876	-36.633		82.2711	-34.887		82.2631	-29.373		82.2961	-31.557
82.3215	-32.742		82.3212	-32.996		82.3003	-34.949		82.3293	-36.625		82.3293	-36.625		82.3128	-34.882		82.3047	-29.366		82.3377	-31.552
82.3632	-32.734		82.3629	-32.988		82.3419	-34.944		82.371	-36.618		82.371	-36.618		82.3544	-34.877		82.3464	-29.36		82.3794	-31.547
82.4049	-32.727		82.4046	-32.98		82.3852	-34.939		82.4126	-36.611		82.4126	-36.611		82.3961	-34.872		82.3881	-29.355		82.4211	-31.542
82.4465	-32.718		82.4462	-32.971		82.4269	-34.934		82.4543	-36.603		82.4543	-36.603		82.4378	-34.866		82.4298	-29.349		82.4627	-31.537
82.4882	-32.711		82.4879	-32.962		82.4686	-34.928		82.4959	-36.596		82.4959	-36.596		82.4794	-34.86		82.4714	-29.344		82.5044	-31.533
82.5299	-32.704		82.5296	-32.954		82.5103	-34.921		82.5376	-36.589		82.5376	-36.589		82.5211	-34.854		82.5131	-29.338		82.5461	-31.528
82.5715	-32.697		82.5712	-32.946		82.5519	-34.915		82.5793	-36.582		82.5793	-36.582		82.5628	-34.849		82.5547	-29.333		82.5877	-31.523
82.6132	-32.69		82.6129	-32.938		82.5936	-34.909		82.6209	-36.575		82.6209	-36.575		82.6045	-34.844		82.5964	-29.327		82.6294	-31.518
82.6548	-32.683		82.6546	-32.93		82.6353	-34.903		82.6626	-36.567		82.6626	-36.567		82.6461	-34.839		82.6381	-29.321		82.6711	-31.514
82.6965	-32.675		82.6962	-32.922		82.6769	-34.897		82.7043	-36.559		82.7043	-36.559		82.6878	-34.834		82.6797	-29.316		82.7127	-31.509
82.7382	-32.669		82.7379	-32.913		82.7186	-34.891		82.7459	-36.552		82.7459	-36.552		82.7294	-34.83		82.7214	-29.31		82.7544	-31.504
82.7799	-32.663		82.7796	-32.905		82.7603	-34.886		82.7876	-36.544		82.7876	-36.544		82.7711	-34.825		82.7631	-29.304		82.7961	-31.5
82.8215	-32.657		82.8212	-32.897		82.8019	-34.88		82.8293	-36.536		82.8293	-36.536		82.8128	-34.82		82.8047	-29.299		82.8377	-31.495
82.8632	-32.651		82.8629	-32.887		82.8436	-34.874		82.8709	-36.528		82.8709	-36.528		82.8544	-34.815		82.8464	-29.293		82.8794	-31.491
82.9049	-32.644		82.9046	-32.878		82.8853	-34.867		82.9126	-36.521		82.9126	-36.521		82.8961	-34.809		82.8881	-29.288		82.921	-31.485
82.9465	-32.637		82.9462	-32.868		82.9269	-34.86		82.9543	-36.513		82.9543	-36.513		82.9378	-34.804		82.9297	-29.282		82.9627	-31.48
82.9882	-32.629		82.9879	-32.859		82.9686	-34.852		82.9959	-36.506		82.9959	-36.506		82.9794	-34.798		82.9714	-29.276		83.0044	-31.475
83.0299	-32.622		83.0296	-32.851		83.0103	-34.845		83.0376	-36.498		83.0376	-36.498		83.0211	-34.793		83.0131	-29.27		83.0461	-31.469
83.0715	-32.615		83.0712	-32.842		83.0519	-34.838		83.0793	-36.489		83.0793	-36.489		83.0628	-34.788		83.0547	-29.264		83.0877	-31.463
83.1132	-32.607		83.1129	-32.834		83.0936	-34.831		83.1209	-36.481		83.1209	-36.481		83.1044	-34.784		83.0964	-29.258		83.1294	-31.458
83.1549	-32.601		83.1546	-32.825		83.1353	-34.824		83.1626	-36.473		83.1626	-36.473		83.1461	-34.779		83.1381	-29.251		83.1711	-31.453
83.1965	-32.595		83.1962	-32.816		83.1769	-34.816		83.2043	-36.465		83.2043	-36.465		83.1878	-34.773		83.1797	-29.246		83.2127	-31.448
83.2382	-32.589		83.2379	-32.807		83.2186	-34.808		83.2459	-36.458		83.2459	-36.458		83.2294	-34.768		83.2214	-29.239		83.2544	-31.443
83.2799	-32.583		83.2796	-32.797		83.2603	-34.8		83.2876	-36.451		83.2876	-36.451		83.2711	-34.763		83.2631	-29.234		83.2961	-31.438
83.3216	-32.576		83.3212	-32.788		83.3019	-34.791		83.3293	-36.443		83.3293	-36.443		83.3128	-34.757		83.3047	-29.228		83.3377	-31.432
83.3632	-32.568		83.3629	-32.779		83.3436	-34.783		83.3709	-36.435		83.3709	-36.435		83.3545	-34.75		83.3464	-29.222		83.3794	-31.427
83.4049	-32.558		83.4046	-32.769		83.3853	-34.773		83.4126	-36.428		83.4126	-36.428		83.3961	-34.744		83.3881	-29.216		83.4211	-31.422
83.4465	-32.549		83.4462	-32.761		83.4269	-34.763		83.4543	-36.42		83.4543	-36.42		83.4378	-34.738		83.4297	-29.21		83.4627	-31.416
83.4882	-32.54		83.4879	-32.752		83.4686	-34.755		83.496	-36.411		83.496	-36.411		83.4794	-34.732		83.4714	-29.203		83.5044	-31.411
83.5299	-32.53		83.5296	-32.743		83.5103	-34.746		83.5376	-36.402		83.5376	-36.402		83.5211	-34.726		83.5131	-29.197		83.5461	-31.405
83.5715	-32.522		83.5712	-32.733		83.5519	-34.737		83.5793	-36.393		83.5793	-36.393		83.5628	-34.721		83.5547	-29.19		83.5877	-31.4
83.6132	-32.514		83.6129	-32.722		83.5953	-34.728		83.621	-36.384		83.621	-36.384		83.6045	-34.715		83.5964	-29.184		83.6294	-31.394
83.6549	-32.507		83.6546	-32.712		83.6369	-34.72		83.6626	-36.376		83.6626	-36.376		83.6461	-34.71		83.6381	-29.179		83.6711	-31.388
83.6965	-32.5		83.6962	-32.701		83.6786	-34.71		83.7043	-36.367		83.7043	-36.367		83.6878	-34.703		83.6798	-29.173		83.7127	-31.382
83.7382	-32.492		83.7379	-32.692		83.7203	-34.7		83.746	-36.359		83.746	-36.359		83.7295	-34.697		83.7214	-29.167		83.7544	-31.376
83.7799	-32.484		83.7796	-32.682		83.7619	-34.691		83.7876	-36.351		83.7876	-36.351		83.7711	-34.691		83.7631	-29.161		83.7961	-31.369
83.8215	-32.475		83.8213	-32.673		83.8036	-34.681		83.8293	-36.343		83.8293	-36.343		83.8128	-34.684		83.8048	-29.155		83.8377	-31.362
83.8632	-32.465		83.8629	-32.664		83.8453	-34.671		83.871	-36.334		83.871	-36.334		83.8545	-34.679		83.8464	-29.148		83.8794	-31.355
83.9049	-32.455		83.9046	-32.654		83.8869	-34.662		83.9126	-36.326		83.9126	-36.326		83.8961	-34.673		83.8881	-29.141		83.9211	-31.349
83.9465	-32.446		83.9463	-32.644		83.9286	-34.653		83.9543	-36.318		83.9543	-36.318		83.9378	-34.667		83.9298	-29.133		83.9628	-31.343
83.9882	-32.436		83.9879	-32.634		83.9703	-34.645		83.996	-36.309		83.996	-36.309		83.9795	-34.662		83.9714	-29.126		84.0044	-31.337
84.0299	-32.427		84.0296	-32.623		84.0119	-34.635		84.0376	-36.3		84.0376	-36.3		84.0211	-34.656		84.0131	-29.119		84.0461	-31.331
84.0715	-32.416		84.0713	-32.613		84.0536	-34.625		84.0793	-36.292		84.0793	-36.292		84.0628	-34.65		84.0547	-29.112		84.0878	-31.326
84.1132	-32.406		84.1129	-32.602		84.0953	-34.615		84.121	-36.284		84.121	-36.284		84.1045	-34.644		84.0964	-29.105		84.1294	-31.32
84.1549	-32.396		84.1546	-32.592		84.1369	-34.604		84.1626	-36.276		84.1626	-36.276		84.1461	-34.637		84.1381	-29.099		84.1711	-31.314
84.1965	-32.386		84.1963	-32.583		84.1786	-34.594		84.2043	-36.267		84.2043	-36.267		84.1878	-34.63		84.1798	-29.092		84.2128	-31.307
84.2382	-32.376		84.2379	-32.573		84.2203	-34.583		84.246	-36.259		84.246	-36.259		84.2295	-34.624		84.2214	-29.085		84.2544	-31.301
84.2799	-32.367		84.2796	-32.563		84.2619	-34.573		84.2876	-36.25		84.2876	-36.25		84.2711	-34.617		84.2631	-29.078		84.2961	-31.294
84.3215	-32.358		84.3212	-32.553		84.3036	-34.563		84.3293	-36.24		84.3293	-36.24		84.3128	-34.61		84.3048	-29.07		84.3378	-31.287
84.3632	-32.35		84.3629	-32.542		84.3453	-34.553		84.371	-36.23		84.371	-36.23		84.3545	-34.604		84.3464	-29.062		84.3795	-31.28
84.4049	-32.343		84.4046	-32.531		84.3869	-34.544		84.4126	-36.221		84.4126	-36.221		84.3961	-34.598		84.3881	-29.055		84.4211	-31.273
84.4465	-32.335		84.4462	-32.52		84.4286	-34.534		84.4543	-36.212		84.4543	-36.212		84.4378	-34.592		84.4297	-29.048		84.4628	-31.267
84.4882	-32.327		84.4879	-32.508		84.4703	-34.522		84.496	-36.204		84.496	-36.204		84.4794	-34.585		84.4714	-29.041		84.5045	-31.261
84.5299	-32.317		84.5296	-32.498		84.512	-34.511		84.5376	-36.195		84.5376	-36.195		84.5211	-34.578		84.5131	-29.035		84.5461	-31.254
84.5715	-32.307		84.5713	-32.487		84.5536	-34.5		84.5793	-36.187		84.5793	-36.187		84.5628	-34.571		84.5547	-29.028		84.5878	-31.247
84.6132	-32.298		84.6129	-32.477		84.5953	-34.49		84.621	-36.177		84.621	-36.177		84.6045	-34.564		84.5964	-29.021		84.6295	-31.239
84.6549	-32.289		84.6546	-32.466		84.6369	-34.479		84.6626	-36.168		84.6626	-36.168		84.6461	-34.557		84.6381	-29.014		84.6711	-31.231
84.6965	-32.28		84.6963	-32.455		84.6786	-34.469		84.7043	-36.159		84.7043	-36.159		84.6878	-34.55		84.6798	-29.006		84.7128	-31.223
84.7382	-32.273		84.7379	-32.444		84.7203	-34.46		84.746	-36.15		84.746	-36.15		84.7295	-34.543		84.7214	-28.998		84.7545	-31.215
84.7799	-32.266		84.7796	-32.433		84.762	-34.449		84.7876	-36.141		84.7876	-36.141		84.7711	-34.537		84.7631	-28.99		84.7961	-31.208
84.8215	-32.258		84.8213	-32.421		84.8053	-34.438		84.8293	-36.133		84.8293	-36.133		84.8128	-34.531		84.8048	-28.982		84.8378	-31.201
84.8632	-32.25		84.8629	-32.41		84.847	-34.427		84.871	-36.124		84.871	-36.124		84.8545	-34.525		84.8464	-28.975		84.8795	-31.194
84.9049	-32.242		84.9046	-32.399		84.8886	-34.415		84.9126	-36.116		84.9126	-36.116		84.8961	-34.519		84.8881	-28.968		84.9211	-31.187
84.9466	-32.232		84.9463	-32.389		84.9303	-34.404		84.9543	-36.107		84.9543	-36.107		84.9378	-34.513		84.9298	-28.961		84.9628	-31.18
84.9882	-32.222		84.9879	-32.379		84.972	-34.393		84.996	-36.098		84.996	-36.098		84.9795	-34.506		84.9715	-28.954		85.0045	-31.173
85.0299	-32.212		85.0296	-32.368		85.0136	-34.381		85.0376	-36.089		85.0376	-36.089		85.0211	-34.5		85.0131	-28.947		85.0461	-31.165
85.0716	-32.203		85.0713	-32.357		85.0553	-34.37		85.0793	-36.079		85.0793	-36.079		85.0628	-34.493		85.0548	-28.941		85.0878	-31.157
85.1132	-32.193		85.1129	-32.345		85.097	-34.359		85.121	-36.069		85.121	-36.069		85.1045	-34.486		85.0964	-28.933		85.1295	-31.149
85.1549	-32.184		85.1546	-32.333		85.1386	-34.348		85.1626	-36.058		85.1626	-36.058		85.1461	-34.48		85.1381	-28.926		85.1711	-31.141
85.1966	-32.175		85.1963	-32.321		85.1803	-34.337		85.2043	-36.048		85.2043	-36.048		85.1878	-34.474		85.1798	-28.918		85.2128	-31.134
85.2382	-32.165		85.2379	-32.309		85.222	-34.326		85.246	-36.039		85.246	-36.039		85.2295	-34.468		85.2214	-28.911		85.2545	-31.127
85.2799	-32.155		85.2796	-32.298		85.2636	-34.314		85.2877	-36.029		85.2877	-36.029		85.2712	-34.462		85.2631	-28.903		85.2961	-31.12
85.3216	-32.145		85.3213	-32.287		85.3053	-34.303		85.3293	-36.02		85.3293	-36.02		85.3128	-34.455		85.3048	-28.895		85.3378	-31.113
85.3632	-32.135		85.3629	-32.276		85.347	-34.292		85.371	-36.01		85.371	-36.01		85.3545	-34.448		85.3464	-28.888		85.3795	-31.106
85.4049	-32.124		85.4046	-32.265		85.3886	-34.282		85.4127	-36		85.4127	-36		85.3961	-34.442		85.3881	-28.88		85.4211	-31.099
85.4465	-32.114		85.4463	-32.254		85.4303	-34.272		85.4543	-35.99		85.4543	-35.99		85.4378	-34.435		85.4298	-28.872		85.4628	-31.091
85.4882	-32.104		85.4879	-32.242		85.472	-34.261		85.496	-35.981		85.496	-35.981		85.4795	-34.429		85.4715	-28.864		85.5045	-31.083
85.5299	-32.093		85.5296	-32.23		85.5136	-34.25		85.5377	-35.971		85.5377	-35.971		85.5212	-34.423		85.5131	-28.855		85.5461	-31.075
85.5715	-32.082		85.5713	-32.219		85.5553	-34.24		85.5793	-35.962		85.5793	-35.962		85.5628	-34.417		85.5548	-28.847		85.5878	-31.068
85.6132	-32.071		85.6129	-32.208		85.597	-34.228		85.621	-35.952		85.621	-35.952		85.6045	-34.411		85.5965	-28.838		85.6295	-31.06
85.6549	-32.061		85.6546	-32.196		85.6386	-34.217		85.6627	-35.944		85.6627	-35.944		85.6462	-34.406		85.6381	-28.83		85.6711	-31.053
85.6965	-32.051		85.6963	-32.185		85.6803	-34.205		85.7043	-35.935		85.7043	-35.935		85.6878	-34.4		85.6798	-28.822		85.7128	-31.046
85.7382	-32.04		85.7379	-32.174		85.722	-34.194		85.746	-35.926		85.746	-35.926		85.7295	-34.395		85.7215	-28.814		85.7545	-31.04
85.7799	-32.03		85.7796	-32.163		85.7636	-34.183		85.7877	-35.917		85.7877	-35.917		85.7712	-34.389		85.7631	-28.806		85.7962	-31.033
85.8215	-32.019		85.8213	-32.151		85.8053	-34.173		85.8293	-35.907		85.8293	-35.907		85.8128	-34.383		85.8048	-28.799		85.8378	-31.025
85.8632	-32.009		85.8629	-32.139		85.847	-34.163		85.871	-35.897		85.871	-35.897		85.8545	-34.376		85.8465	-28.791		85.8795	-31.018
85.9049	-31.999		85.9046	-32.127		85.8886	-34.153		85.9127	-35.887		85.9127	-35.887		85.8962	-34.369		85.8881	-28.783		85.9212	-31.01
85.9466	-31.989		85.9463	-32.115		85.9303	-34.143		85.9543	-35.878		85.9543	-35.878		85.9378	-34.363		85.9298	-28.775		85.9628	-31.002
85.9882	-31.979		85.9879	-32.104		85.972	-34.133		85.996	-35.868		85.996	-35.868		85.9795	-34.357		85.9715	-28.766		86.0045	-30.995
86.0299	-31.969		86.0296	-32.094		86.0136	-34.122		86.0377	-35.859		86.0377	-35.859		86.0212	-34.352		86.0131	-28.759		86.0461	-30.988
86.0716	-31.958		86.0713	-32.083		86.0553	-34.111		86.0793	-35.85		86.0793	-35.85		86.0628	-34.347		86.0548	-28.752		86.0878	-30.981
86.1132	-31.947		86.1129	-32.071		86.097	-34.099		86.121	-35.842		86.121	-35.842		86.1045	-34.342		86.0965	-28.744		86.1295	-30.974
86.1549	-31.936		86.1546	-32.061		86.1403	-34.088		86.1627	-35.833		86.1627	-35.833		86.1462	-34.336		86.1381	-28.737		86.1711	-30.967
86.1966	-31.926		86.1963	-32.049		86.182	-34.077		86.2043	-35.823		86.2043	-35.823		86.1878	-34.33		86.1798	-28.729		86.2128	-30.959
86.2382	-31.915		86.2379	-32.038		86.2236	-34.067		86.246	-35.813		86.246	-35.813		86.2295	-34.324		86.2215	-28.72		86.2545	-30.951
86.2799	-31.905		86.2796	-32.027		86.2653	-34.056		86.2877	-35.803		86.2877	-35.803		86.2712	-34.318		86.2631	-28.712		86.2961	-30.943
86.3216	-31.895		86.3213	-32.015		86.307	-34.044		86.3293	-35.793		86.3293	-35.793		86.3128	-34.312		86.3048	-28.704		86.3378	-30.935
86.3632	-31.886		86.3629	-32.004		86.3486	-34.033		86.371	-35.784		86.371	-35.784		86.3545	-34.306		86.3465	-28.696		86.3795	-30.927
86.4049	-31.876		86.4046	-31.993		86.3903	-34.021		86.4126	-35.775		86.4126	-35.775		86.3962	-34.301		86.3881	-28.688		86.4212	-30.918
86.4466	-31.867		86.4463	-31.982		86.432	-34.009		86.4543	-35.766		86.4543	-35.766		86.4378	-34.295		86.4298	-28.68		86.4628	-30.911
86.4882	-31.857		86.4879	-31.971		86.4736	-33.997		86.496	-35.757		86.496	-35.757		86.4795	-34.29		86.4715	-28.672		86.5045	-30.903
86.5299	-31.846		86.5296	-31.96		86.5153	-33.985		86.5377	-35.747		86.5377	-35.747		86.5212	-34.285		86.5131	-28.664		86.5462	-30.896
86.5716	-31.837		86.5713	-31.949		86.557	-33.974		86.5793	-35.738		86.5793	-35.738		86.5628	-34.279		86.5548	-28.657		86.5878	-30.889
86.6132	-31.828		86.6129	-31.937		86.5986	-33.964		86.621	-35.727		86.621	-35.727		86.6045	-34.273		86.5965	-28.65		86.6295	-30.882
86.6549	-31.82		86.6546	-31.925		86.6403	-33.953		86.6627	-35.716		86.6627	-35.716		86.6462	-34.267		86.6381	-28.642		86.6712	-30.873
86.6966	-31.812		86.6963	-31.914		86.682	-33.942		86.7043	-35.706		86.7043	-35.706		86.6878	-34.262		86.6798	-28.634		86.7128	-30.866
86.7382	-31.803		86.7379	-31.902		86.7237	-33.93		86.746	-35.697		86.746	-35.697		86.7295	-34.255		86.7215	-28.626		86.7545	-30.858
86.7799	-31.795		86.7796	-31.891		86.7653	-33.918		86.7877	-35.687		86.7877	-35.687		86.7712	-34.249		86.7631	-28.617		86.7962	-30.85
86.8216	-31.786		86.8213	-31.88		86.807	-33.907		86.8293	-35.678		86.8293	-35.678		86.8128	-34.243		86.8048	-28.608		86.8378	-30.842
86.8632	-31.775		86.8629	-31.869		86.8487	-33.895		86.871	-35.669		86.871	-35.669		86.8545	-34.237		86.8465	-28.6		86.8795	-30.835
86.9049	-31.764		86.9046	-31.856		86.8903	-33.885		86.9127	-35.659		86.9127	-35.659		86.8962	-34.232		86.8881	-28.592		86.9212	-30.828
86.9466	-31.752		86.9463	-31.843		86.932	-33.875		86.9543	-35.649		86.9543	-35.649		86.9378	-34.227		86.9365	-28.583		86.9628	-30.821
86.9882	-31.741		86.988	-31.831		86.9737	-33.864		86.996	-35.638		86.996	-35.638		86.9795	-34.222		86.9781	-28.575		87.0045	-30.813
87.0299	-31.73		87.0296	-31.818		87.0153	-33.852		87.0377	-35.628		87.0377	-35.628		87.0212	-34.216		87.0198	-28.567		87.0462	-30.806
87.0716	-31.72		87.0713	-31.806		87.057	-33.841		87.0793	-35.618		87.0793	-35.618		87.0628	-34.211		87.0615	-28.559		87.0878	-30.797
87.1132	-31.71		87.113	-31.793		87.0987	-33.828		87.121	-35.608		87.121	-35.608		87.1045	-34.205		87.1031	-28.551		87.1295	-30.789
87.1549	-31.701		87.1546	-31.782		87.1403	-33.816		87.1627	-35.598		87.1627	-35.598		87.1462	-34.2		87.1448	-28.542		87.1712	-30.78
87.1966	-31.691		87.1963	-31.769		87.182	-33.803		87.2043	-35.59		87.2043	-35.59		87.1878	-34.194		87.1865	-28.534		87.2128	-30.772
87.2382	-31.681		87.238	-31.757		87.2237	-33.791		87.246	-35.58		87.246	-35.58		87.2295	-34.189		87.2281	-28.526		87.2545	-30.764
87.2799	-31.67		87.2796	-31.743		87.2653	-33.78		87.2877	-35.57		87.2877	-35.57		87.2712	-34.184		87.2698	-28.518		87.2962	-30.757
87.3216	-31.66		87.3213	-31.729		87.307	-33.769		87.3293	-35.561		87.3293	-35.561		87.3128	-34.18		87.3115	-28.511		87.3378	-30.75
87.3632	-31.649		87.363	-31.716		87.3487	-33.757		87.371	-35.55		87.371	-35.55		87.3545	-34.175		87.3531	-28.504		87.3795	-30.743
87.4049	-31.639		87.4046	-31.703		87.392	-33.744		87.4127	-35.539		87.4127	-35.539		87.3962	-34.171		87.3948	-28.497		87.4212	-30.736
87.4466	-31.629		87.4463	-31.689		87.4337	-33.731		87.4543	-35.529		87.4543	-35.529		87.4379	-34.165		87.4365	-28.49		87.4628	-30.728
87.4882	-31.619		87.488	-31.676		87.4753	-33.718		87.496	-35.519		87.496	-35.519		87.4795	-34.16		87.4781	-28.482		87.5045	-30.72
87.5299	-31.61		87.5296	-31.664		87.517	-33.706		87.5377	-35.51		87.5377	-35.51		87.5212	-34.153		87.5198	-28.474		87.5462	-30.712
87.5716	-31.599		87.5713	-31.652		87.5587	-33.694		87.5794	-35.501		87.5794	-35.501		87.5628	-34.147		87.5615	-28.466		87.5878	-30.704
87.6132	-31.588		87.613	-31.639		87.6003	-33.681		87.621	-35.492		87.621	-35.492		87.6045	-34.141		87.6031	-28.458		87.6295	-30.696
87.6549	-31.576		87.6546	-31.625		87.642	-33.668		87.6627	-35.482		87.6627	-35.482		87.6462	-34.135		87.6448	-28.45		87.6712	-30.688
87.6966	-31.564		87.6963	-31.611		87.6837	-33.656		87.7044	-35.472		87.7044	-35.472		87.6878	-34.129		87.6865	-28.442		87.7128	-30.68
87.7382	-31.553		87.738	-31.597		87.7253	-33.643		87.746	-35.462		87.746	-35.462		87.7295	-34.123		87.7281	-28.435		87.7545	-30.672
87.7799	-31.543		87.7796	-31.584		87.767	-33.631		87.7877	-35.451		87.7877	-35.451		87.7712	-34.118		87.7698	-28.426		87.7962	-30.664
87.8216	-31.532		87.8213	-31.571		87.8087	-33.618		87.8294	-35.441		87.8294	-35.441		87.8128	-34.113		87.8115	-28.418		87.8378	-30.656
87.8632	-31.522		87.863	-31.558		87.8504	-33.604		87.871	-35.431		87.871	-35.431		87.8545	-34.107		87.8531	-28.409		87.8795	-30.646
87.9049	-31.511		87.9046	-31.544		87.892	-33.591		87.9127	-35.422		87.9127	-35.422		87.8962	-34.101		87.8948	-28.4		87.9212	-30.637
87.9466	-31.499		87.9463	-31.529		87.9337	-33.58		87.9544	-35.413		87.9544	-35.413		87.9378	-34.094		87.9365	-28.391		87.9628	-30.628
87.9882	-31.486		87.988	-31.515		87.9754	-33.568		87.996	-35.403		87.996	-35.403		87.9795	-34.087		87.9781	-28.381		88.0045	-30.619
88.0299	-31.473		88.0296	-31.499		88.017	-33.556		88.0377	-35.392		88.0377	-35.392		88.0212	-34.081		88.0198	-28.373		88.0462	-30.61
88.0716	-31.46		88.0713	-31.484		88.0587	-33.543		88.0794	-35.382		88.0794	-35.382		88.0628	-34.075		88.0615	-28.364		88.0878	-30.601
88.1133	-31.448		88.113	-31.469		88.1003	-33.531		88.121	-35.372		88.121	-35.372		88.1045	-34.068		88.1031	-28.356		88.1295	-30.593
88.1549	-31.438		88.1546	-31.455		88.142	-33.519		88.1627	-35.362		88.1627	-35.362		88.1462	-34.062		88.1448	-28.347		88.1712	-30.584
88.1966	-31.427		88.1963	-31.442		88.1837	-33.506		88.2044	-35.351		88.2044	-35.351		88.1879	-34.056		88.1865	-28.338		88.2128	-30.575
88.2383	-31.416		88.238	-31.427		88.2253	-33.493		88.246	-35.34		88.246	-35.34		88.2295	-34.05		88.2281	-28.329		88.2545	-30.565
88.2799	-31.405		88.2796	-31.412		88.267	-33.48		88.2877	-35.329		88.2877	-35.329		88.2712	-34.043		88.2698	-28.32		88.2962	-30.556
88.3216	-31.394		88.3213	-31.397		88.3087	-33.468		88.3294	-35.319		88.3294	-35.319		88.3128	-34.037		88.3115	-28.31		88.3378	-30.548
[truncated: 880 more rows]

## Sheet: MSI-78 scans
60% MSI-78			40% MSI-78			20% MSI-78			5% MSI-78			2.5% MSI-78
Temp	Power		Temp	Power		Temp	Power		Temp	Power		Temp	Power
5.00113	-36.078		5.0013	-35.728		5.00138	-35.87		5.00101	-35.984		5.00116	-36.495
5.01845	-35.312		5.01748	-34.873		5.01872	-35.106		5.01823	-35.211		5.01847	-35.727
5.05665	-32.544		5.05521	-32.401		5.05686	-32.32		5.04933	-33.62		5.04961	-33.979
5.09416	-27.744		5.09249	-27.567		5.09429	-27.47		5.09373	-27.731		5.09404	-27.75
5.13479	-24.371		5.13299	-24.023		5.13487	-23.996		5.13431	-24.425		5.13464	-24.142
5.17756	-23.317		5.17568	-22.849		5.18633	-22.737		5.17703	-23.428		5.17739	-22.997
5.22177	-22.999		5.21986	-22.401		5.23074	-22.703		5.22123	-23.208		5.22161	-22.574
5.27601	-25.913		5.2741	-24.989		5.27597	-25.091		5.26635	-25.588		5.26676	-24.718
5.3217	-29.527		5.31982	-28.412		5.32165	-28.525		5.31199	-29.119		5.31242	-28.022
5.36755	-33.622		5.36572	-32.334		5.36749	-32.431		5.35782	-33.192		5.35829	-31.874
5.41335	-37.778		5.41157	-36.345		5.41328	-36.425		5.40365	-37.404		5.40415	-35.883
5.45894	-41.697		5.45724	-40.157		5.45888	-40.229		5.44931	-41.466		5.44984	-39.778
5.50426	-45.183		5.50262	-43.593		5.5042	-43.656		5.49471	-45.164		5.49525	-43.379
5.54923	-48.178		5.54765	-46.597		5.55813	-47.362		5.54874	-49.244		5.54931	-47.255
5.59384	-50.719		5.59232	-49.153		5.60267	-49.731		5.59337	-51.803		5.59395	-49.841
5.63807	-52.835		5.63661	-51.264		5.64683	-51.69		5.63763	-53.929		5.63821	-51.989
5.68194	-54.546		5.68053	-52.941		5.69064	-53.268		5.68152	-55.654		5.68212	-53.707
5.72548	-55.846		5.72411	-54.207		5.73412	-54.469		5.72508	-56.984		5.72567	-55.012
5.7687	-56.786		5.76737	-55.116		5.77729	-55.331		5.76831	-57.948		5.76892	-55.953
5.81165	-57.428		5.81035	-55.727		5.82019	-55.903		5.81127	-58.602		5.81187	-56.589
5.85434	-57.827		5.85307	-56.101		5.86285	-56.25		5.86249	-59.064		5.85458	-56.986
5.89683	-58.035		5.89558	-56.295		5.9053	-56.426		5.90494	-59.251		5.90386	-57.213
5.93913	-58.127		5.9379	-56.378		5.94757	-56.499		5.94722	-59.327		5.94614	-57.291
5.98128	-58.171		5.98007	-56.422		5.9897	-56.541		5.98934	-59.37		5.98827	-57.334
6.02331	-58.18		6.02211	-56.415		6.03171	-56.524		6.03135	-59.351		6.03029	-57.319
6.06524	-57.972		6.06404	-56.162		6.07361	-56.259		6.08163	-58.991		6.0722	-57.056
6.10708	-57.524		6.1059	-55.69		6.11545	-55.785		6.12345	-58.476		6.11404	-56.574
6.14886	-56.951		6.14769	-55.102		6.15722	-55.198		6.16521	-57.862		6.15582	-55.976
6.1906	-56.31		6.18943	-54.453		6.19895	-54.553		6.20693	-57.194		6.19755	-55.324
6.23231	-55.634		6.23114	-53.773		6.24064	-53.884		6.24862	-56.51		6.23926	-54.647
6.27399	-54.955		6.27282	-53.095		6.28231	-53.213		6.29028	-55.824		6.28093	-53.968
6.31565	-54.29		6.31449	-52.429		6.32397	-52.555		6.33193	-55.154		6.32259	-53.301
6.35729	-53.643		6.35614	-51.778		6.36561	-51.916		6.37357	-54.507		6.36424	-52.652
6.39893	-53.02		6.39777	-51.152		6.40724	-51.304		6.4152	-53.888		6.40588	-52.037
6.44057	-52.428		6.4394	-50.564		6.44887	-50.718		6.45682	-53.297		6.44751	-51.447
6.48219	-51.86		6.48103	-50.002		6.4905	-50.162		6.49844	-52.738		6.48913	-50.885
6.52381	-51.328		6.52265	-49.471		6.53212	-49.64		6.54007	-52.208		6.53075	-50.353
6.56544	-50.819		6.56427	-48.963		6.57375	-49.142		6.58169	-51.709		6.57238	-49.854
6.60707	-50.337		6.6059	-48.487		6.61539	-48.665		6.62332	-51.229		6.61401	-49.371
6.64872	-49.874		6.64754	-48.032		6.65703	-48.216		6.66496	-50.776		6.65565	-48.917
6.69038	-49.436		6.68918	-47.6		6.69868	-47.79		6.70661	-50.345		6.6973	-48.482
6.73204	-49.02		6.73084	-47.19		6.74035	-47.384		6.74828	-49.933		6.73897	-48.064
6.77371	-48.617		6.77252	-46.796		6.78203	-46.994		6.78995	-49.543		6.78064	-47.67
6.81539	-48.24		6.8142	-46.418		6.82371	-46.627		6.83164	-49.174		6.82233	-47.291
6.85708	-47.885		6.85589	-46.061		6.8654	-46.277		6.87333	-48.815		6.86402	-46.932
6.89878	-47.541		6.89759	-45.722		6.90709	-45.936		6.91502	-48.474		6.90572	-46.594
6.94048	-47.212		6.93929	-45.4		6.94879	-45.616		6.95672	-48.154		6.94742	-46.27
6.98218	-46.901		6.981	-45.088		6.99049	-45.313		6.99842	-47.849		6.98913	-45.961
7.02389	-46.602		7.02271	-44.796		7.03219	-45.022		7.04012	-47.555		7.03085	-45.662
7.06559	-46.314		7.06442	-44.517		7.07389	-44.742		7.08183	-47.273		7.07256	-45.376
7.1073	-46.035		7.10613	-44.252		7.11559	-44.467		7.12353	-47		7.11427	-45.103
7.149	-45.77		7.15619	-43.941		7.16564	-44.159		7.16523	-46.739		7.15598	-44.843
7.19071	-45.516		7.1979	-43.692		7.20734	-43.914		7.20694	-46.49		7.19768	-44.591
7.23241	-45.275		7.23961	-43.453		7.24904	-43.676		7.24864	-46.244		7.23939	-44.347
7.27412	-45.038		7.28132	-43.223		7.29074	-43.449		7.29034	-46.008		7.28111	-44.112
7.31582	-44.806		7.32303	-43.003		7.33244	-43.227		7.33204	-45.782		7.32281	-43.883
7.35752	-44.58		7.36474	-42.789		7.37414	-43.01		7.37374	-45.563		7.36452	-43.664
7.39922	-44.367		7.40644	-42.578		7.41584	-42.8		7.41544	-45.354		7.40622	-43.454
7.44092	-44.161		7.44815	-42.374		7.45754	-42.599		7.45714	-45.151		7.44792	-43.246
7.48262	-43.961		7.48985	-42.177		7.49923	-42.406		7.49884	-44.952		7.48962	-43.043
7.52432	-43.764		7.53155	-41.99		7.54092	-42.217		7.54054	-44.759		7.53132	-42.846
7.56601	-43.573		7.57326	-41.809		7.58262	-42.033		7.58223	-44.57		7.57302	-42.657
7.60771	-43.387		7.61495	-41.632		7.62431	-41.854		7.62392	-44.388		7.61472	-42.474
7.6494	-43.209		7.65665	-41.457		7.66601	-41.678		7.66562	-44.213		7.65642	-42.298
7.69109	-43.037		7.69834	-41.287		7.7077	-41.51		7.70731	-44.043		7.69811	-42.129
7.73279	-42.873		7.74003	-41.123		7.74939	-41.352		7.749	-43.879		7.73981	-41.965
7.77448	-42.713		7.78173	-40.969		7.79108	-41.196		7.79069	-43.717		7.7815	-41.806
7.81616	-42.557		7.82342	-40.816		7.83277	-41.045		7.83238	-43.56		7.82319	-41.648
7.85785	-42.405		7.86511	-40.67		7.87445	-40.897		7.87407	-43.408		7.86489	-41.499
7.89954	-42.258		7.90681	-40.531		7.91614	-40.754		7.91575	-43.264		7.90658	-41.353
7.94123	-42.116		7.94849	-40.39		7.95782	-40.615		7.95744	-43.126		7.94827	-41.211
7.98292	-41.978		7.99018	-40.256		7.99951	-40.482		7.99913	-42.991		7.98996	-41.075
8.0246	-41.846		8.03187	-40.124		8.04119	-40.355		8.04081	-42.858		8.03164	-40.94
8.06629	-41.718		8.07355	-39.994		8.08288	-40.234		8.08249	-42.732		8.07333	-40.808
8.10797	-41.593		8.11523	-39.874		8.12456	-40.115		8.12417	-42.608		8.11502	-40.681
8.14966	-41.47		8.15692	-39.759		8.16624	-39.998		8.16586	-42.49		8.15671	-40.56
8.19134	-41.35		8.1986	-39.648		8.20792	-39.883		8.20754	-42.374		8.19839	-40.444
8.23302	-41.235		8.24029	-39.542		8.2496	-39.775		8.24922	-42.262		8.24008	-40.334
8.2747	-41.126		8.28197	-39.437		8.29128	-39.667		8.29091	-42.156		8.28176	-40.226
8.31638	-41.02		8.32366	-39.336		8.33297	-39.564		8.33259	-42.053		8.32344	-40.12
8.35806	-40.921		8.36535	-39.234		8.37464	-39.464		8.37427	-41.951		8.36512	-40.018
8.39974	-40.825		8.40703	-39.138		8.41632	-39.37		8.41595	-41.851		8.40681	-39.919
8.44142	-40.732		8.44872	-39.045		8.458	-39.279		8.45763	-41.756		8.44849	-39.821
8.4831	-40.64		8.4904	-38.955		8.49968	-39.193		8.49931	-41.66		8.49017	-39.726
8.52478	-40.549		8.53208	-38.87		8.54137	-39.108		8.54099	-41.57		8.53185	-39.636
8.56646	-40.462		8.57376	-38.789		8.58305	-39.026		8.58266	-41.483		8.57353	-39.547
8.60814	-40.377		8.61544	-38.71		8.62472	-38.944		8.62434	-41.401		8.6152	-39.463
8.64982	-40.295		8.65711	-38.635		8.6664	-38.864		8.66602	-41.322		8.65688	-39.381
8.6915	-40.217		8.69879	-38.562		8.70807	-38.789		8.70769	-41.245		8.69855	-39.303
8.73984	-40.129		8.74047	-38.491		8.74975	-38.716		8.74937	-41.17		8.74023	-39.226
8.78152	-40.06		8.78215	-38.421		8.79143	-38.646		8.79105	-41.097		8.78191	-39.149
8.8232	-39.994		8.82383	-38.351		8.8331	-38.58		8.83272	-41.027		8.82359	-39.074
8.86488	-39.927		8.86551	-38.285		8.87478	-38.516		8.87439	-40.957		8.86527	-39.002
8.90655	-39.859		8.90719	-38.219		8.91645	-38.454		8.91607	-40.891		8.90694	-38.935
8.94823	-39.794		8.94887	-38.156		8.95813	-38.394		8.95774	-40.826		8.94862	-38.869
8.9899	-39.729		8.99054	-38.094		8.99981	-38.337		8.99941	-40.765		8.9903	-38.807
9.03157	-39.667		9.03222	-38.038		9.04148	-38.279		9.04109	-40.707		9.03198	-38.748
9.07325	-39.606		9.07389	-37.983		9.08315	-38.223		9.08277	-40.651		9.07365	-38.691
9.11492	-39.548		9.11557	-37.931		9.12482	-38.17		9.12444	-40.599		9.11533	-38.635
9.15659	-39.494		9.15725	-37.882		9.1665	-38.117		9.16612	-40.547		9.157	-38.581
9.19827	-39.442		9.19892	-37.833		9.20818	-38.064		9.2078	-40.497		9.19868	-38.527
9.23994	-39.392		9.2406	-37.786		9.24985	-38.014		9.24947	-40.448		9.24035	-38.476
9.28995	-39.336		9.29061	-37.73		9.29152	-37.966		9.29114	-40.4		9.29036	-38.414
9.33162	-39.288		9.33228	-37.685		9.33319	-37.92		9.33281	-40.354		9.33203	-38.365
9.3733	-39.241		9.37396	-37.64		9.37486	-37.877		9.37449	-40.307		9.3737	-38.317
9.41497	-39.195		9.41563	-37.597		9.41653	-37.836		9.41616	-40.261		9.41538	-38.272
9.45664	-39.148		9.45731	-37.556		9.45821	-37.797		9.45783	-40.216		9.45705	-38.229
9.49832	-39.104		9.49898	-37.517		9.49988	-37.759		9.4995	-40.174		9.49872	-38.187
9.53999	-39.062		9.54066	-37.48		9.54822	-37.716		9.54117	-40.135		9.54039	-38.146
9.58166	-39.022		9.58233	-37.444		9.58989	-37.68		9.58284	-40.097		9.58207	-38.106
9.62333	-38.985		9.624	-37.41		9.63156	-37.644		9.62451	-40.06		9.62374	-38.067
9.665	-38.948		9.66567	-37.378		9.67323	-37.609		9.66619	-40.025		9.66541	-38.029
9.70666	-38.914		9.70734	-37.347		9.7149	-37.576		9.70786	-39.993		9.70708	-37.991
9.74834	-38.883		9.74901	-37.316		9.75657	-37.543		9.74953	-39.961		9.74876	-37.954
9.79001	-38.854		9.79068	-37.285		9.79825	-37.511		9.7912	-39.93		9.79043	-37.917
9.83168	-38.824		9.83235	-37.254		9.83992	-37.481		9.83287	-39.901		9.8321	-37.882
9.87335	-38.794		9.87402	-37.225		9.88158	-37.452		9.87454	-39.872		9.87376	-37.849
9.91502	-38.766		9.91569	-37.196		9.92325	-37.424		9.91621	-39.843		9.91543	-37.818
9.9567	-38.737		9.95736	-37.168		9.96492	-37.398		9.95788	-39.816		9.9571	-37.788
9.99837	-38.708		9.99904	-37.14		10.0066	-37.373		9.99955	-39.79		9.99878	-37.761
10.04	-38.68		10.0407	-37.112		10.0483	-37.35		10.0412	-39.764		10.0404	-37.734
10.0817	-38.652		10.0824	-37.086		10.0899	-37.327		10.0829	-39.739		10.0821	-37.707
10.1234	-38.625		10.1241	-37.062		10.1316	-37.305		10.1246	-39.715		10.1238	-37.682
10.1651	-38.598		10.1657	-37.04		10.1733	-37.282		10.1662	-39.691		10.1655	-37.657
10.2067	-38.573		10.2074	-37.018		10.2149	-37.259		10.2079	-39.669		10.2071	-37.632
10.2484	-38.549		10.2491	-36.998		10.2566	-37.239		10.2496	-39.647		10.2488	-37.608
10.2901	-38.527		10.2907	-36.98		10.2983	-37.218		10.2912	-39.626		10.2905	-37.584
10.3317	-38.506		10.3324	-36.961		10.3399	-37.197		10.3329	-39.606		10.3321	-37.559
10.3734	-38.486		10.3741	-36.944		10.3816	-37.177		10.3746	-39.586		10.3738	-37.536
10.4151	-38.467		10.4157	-36.926		10.4233	-37.156		10.4162	-39.567		10.4155	-37.514
10.4567	-38.449		10.4574	-36.91		10.4649	-37.138		10.4579	-39.547		10.4571	-37.493
10.4984	-38.43		10.4991	-36.893		10.5066	-37.121		10.4996	-39.528		10.4988	-37.472
10.5401	-38.413		10.5407	-36.876		10.5483	-37.104		10.5412	-39.509		10.5405	-37.453
10.5817	-38.394		10.5824	-36.859		10.5899	-37.089		10.5829	-39.491		10.5822	-37.435
10.6234	-38.376		10.6241	-36.843		10.6316	-37.074		10.6246	-39.473		10.6238	-37.417
10.6651	-38.358		10.6657	-36.828		10.6733	-37.06		10.6663	-39.456		10.6655	-37.4
10.7068	-38.341		10.7074	-36.813		10.715	-37.047		10.7079	-39.44		10.7072	-37.382
10.7484	-38.325		10.7491	-36.8		10.7566	-37.034		10.7496	-39.425		10.7488	-37.366
10.7901	-38.309		10.7908	-36.787		10.7983	-37.022		10.7913	-39.41		10.7905	-37.349
10.8318	-38.295		10.8324	-36.774		10.84	-37.011		10.8329	-39.397		10.8322	-37.333
10.8734	-38.28		10.8741	-36.763		10.8816	-37		10.8746	-39.384		10.8738	-37.317
10.9151	-38.267		10.9158	-36.752		10.9233	-36.988		10.9163	-39.371		10.9155	-37.301
10.9568	-38.254		10.9574	-36.742		10.965	-36.976		10.9579	-39.359		10.9572	-37.285
10.9984	-38.242		10.9991	-36.733		11.0067	-36.965		10.9996	-39.348		10.9988	-37.269
11.0401	-38.231		11.0408	-36.724		11.0483	-36.954		11.0413	-39.337		11.0405	-37.255
11.0818	-38.219		11.0824	-36.715		11.09	-36.943		11.0829	-39.326		11.0822	-37.241
11.1234	-38.207		11.1241	-36.706		11.1317	-36.934		11.1246	-39.315		11.1238	-37.228
11.1651	-38.196		11.1658	-36.697		11.1733	-36.924		11.1663	-39.305		11.1655	-37.215
11.2068	-38.185		11.2074	-36.688		11.215	-36.915		11.2079	-39.295		11.2072	-37.203
11.2484	-38.174		11.2491	-36.68		11.2567	-36.907		11.2496	-39.284		11.2489	-37.192
11.2901	-38.163		11.2908	-36.671		11.2983	-36.899		11.2913	-39.274		11.2905	-37.18
11.3318	-38.152		11.3324	-36.662		11.34	-36.892		11.333	-39.265		11.3322	-37.169
11.3734	-38.142		11.3741	-36.654		11.3817	-36.885		11.3746	-39.255		11.3738	-37.158
11.4151	-38.133		11.4158	-36.647		11.4233	-36.879		11.4163	-39.246		11.4155	-37.147
11.4568	-38.124		11.4574	-36.639		11.465	-36.873		11.458	-39.238		11.4572	-37.136
11.4984	-38.116		11.4991	-36.632		11.5067	-36.866		11.4996	-39.23		11.4989	-37.125
11.5401	-38.108		11.5408	-36.625		11.5483	-36.86		11.5413	-39.222		11.5405	-37.115
11.5818	-38.101		11.5824	-36.619		11.59	-36.854		11.583	-39.215		11.5822	-37.105
11.6235	-38.094		11.6241	-36.614		11.6317	-36.848		11.6246	-39.209		11.6239	-37.095
11.6651	-38.088		11.6658	-36.608		11.6733	-36.842		11.6663	-39.202		11.6655	-37.085
11.7068	-38.081		11.7074	-36.603		11.715	-36.836		11.708	-39.196		11.7072	-37.076
11.7485	-38.075		11.7491	-36.599		11.7567	-36.831		11.7496	-39.189		11.7489	-37.067
11.7901	-38.069		11.7908	-36.594		11.7983	-36.825		11.7913	-39.183		11.7905	-37.059
11.8318	-38.062		11.8325	-36.59		11.84	-36.82		11.833	-39.176		11.8322	-37.051
11.8735	-38.055		11.8741	-36.585		11.8817	-36.814		11.8813	-39.169		11.8739	-37.043
11.9151	-38.05		11.9158	-36.581		11.9233	-36.81		11.923	-39.162		11.9155	-37.036
11.9568	-38.044		11.9575	-36.577		11.965	-36.806		11.9646	-39.156		11.9572	-37.028
11.9985	-38.039		11.9991	-36.573		12.0067	-36.802		12.0063	-39.15		11.9989	-37.02
12.0401	-38.034		12.0408	-36.569		12.0483	-36.798		12.048	-39.145		12.0405	-37.013
12.0818	-38.029		12.0825	-36.566		12.09	-36.795		12.0896	-39.139		12.0822	-37.006
12.1235	-38.024		12.1241	-36.562		12.1317	-36.792		12.1313	-39.134		12.1239	-36.998
12.1651	-38.019		12.1658	-36.559		12.1733	-36.789		12.173	-39.13		12.1655	-36.991
12.2068	-38.014		12.2075	-36.556		12.215	-36.786		12.2146	-39.125		12.2072	-36.984
12.2485	-38.01		12.2491	-36.553		12.2567	-36.783		12.2563	-39.122		12.2489	-36.978
12.2901	-38.005		12.2908	-36.55		12.2983	-36.781		12.298	-39.118		12.2905	-36.972
12.3318	-38.001		12.3325	-36.548		12.34	-36.778		12.3396	-39.115		12.3322	-36.966
12.3735	-37.998		12.3741	-36.546		12.3817	-36.776		12.3813	-39.111		12.3739	-36.96
12.4151	-37.994		12.4158	-36.544		12.4233	-36.773		12.423	-39.108		12.4155	-36.955
12.4568	-37.99		12.4575	-36.542		12.465	-36.771		12.4646	-39.105		12.4572	-36.95
12.4985	-37.986		12.4991	-36.54		12.5067	-36.769		12.5063	-39.102		12.4989	-36.946
12.5401	-37.982		12.5408	-36.538		12.5483	-36.766		12.548	-39.099		12.5405	-36.942
12.5818	-37.979		12.5825	-36.537		12.59	-36.764		12.5896	-39.096		12.5822	-36.938
12.6235	-37.975		12.6241	-36.535		12.6317	-36.762		12.6313	-39.092		12.6239	-36.934
12.6651	-37.971		12.6658	-36.534		12.6733	-36.761		12.673	-39.09		12.6655	-36.929
12.7068	-37.967		12.7075	-36.533		12.715	-36.759		12.7146	-39.087		12.7072	-36.925
12.7485	-37.964		12.7491	-36.531		12.7567	-36.758		12.7563	-39.084		12.7489	-36.921
12.7901	-37.961		12.7908	-36.53		12.7983	-36.756		12.798	-39.081		12.7905	-36.916
12.8318	-37.958		12.8325	-36.529		12.84	-36.755		12.8396	-39.079		12.8322	-36.912
12.8735	-37.955		12.8741	-36.527		12.8817	-36.755		12.8813	-39.077		12.8739	-36.907
12.9151	-37.952		12.9158	-36.526		12.9233	-36.754		12.923	-39.074		12.9155	-36.903
12.9568	-37.95		12.9575	-36.525		12.965	-36.753		12.9646	-39.072		12.9572	-36.899
12.9985	-37.948		12.9991	-36.524		13.0067	-36.752		13.0063	-39.07		12.9989	-36.895
13.0401	-37.946		13.0408	-36.523		13.0483	-36.752		13.048	-39.068		13.0405	-36.892
13.0818	-37.944		13.0825	-36.523		13.09	-36.751		13.0896	-39.067		13.0822	-36.888
13.1235	-37.942		13.1241	-36.522		13.1317	-36.75		13.1313	-39.065		13.1239	-36.885
13.1651	-37.94		13.1658	-36.521		13.1733	-36.75		13.173	-39.063		13.1655	-36.882
13.2068	-37.938		13.2075	-36.521		13.215	-36.749		13.2146	-39.062		13.2072	-36.879
13.2485	-37.937		13.2491	-36.521		13.2567	-36.748		13.2563	-39.06		13.2489	-36.876
13.2901	-37.935		13.2908	-36.52		13.2983	-36.748		13.298	-39.058		13.2905	-36.873
13.3318	-37.933		13.3325	-36.52		13.34	-36.747		13.3396	-39.057		13.3322	-36.87
13.3735	-37.931		13.3741	-36.52		13.3817	-36.747		13.3813	-39.055		13.3739	-36.867
13.4151	-37.929		13.4158	-36.519		13.4233	-36.746		13.423	-39.053		13.4155	-36.863
13.4568	-37.927		13.4575	-36.519		13.465	-36.746		13.4646	-39.052		13.4572	-36.86
13.4985	-37.926		13.4991	-36.519		13.5067	-36.746		13.5063	-39.051		13.4989	-36.857
13.5401	-37.925		13.5408	-36.519		13.5483	-36.745		13.5563	-39.049		13.5405	-36.854
13.5818	-37.924		13.5825	-36.519		13.59	-36.745		13.598	-39.048		13.5822	-36.851
13.6235	-37.923		13.6241	-36.518		13.6317	-36.745		13.6396	-39.047		13.6239	-36.848
13.6651	-37.922		13.6658	-36.518		13.6733	-36.745		13.6813	-39.046		13.6655	-36.845
13.7068	-37.921		13.7075	-36.518		13.715	-36.745		13.723	-39.046		13.7072	-36.842
13.7485	-37.92		13.7491	-36.518		13.7567	-36.745		13.7646	-39.045		13.7489	-36.84
13.7901	-37.919		13.7908	-36.518		13.7983	-36.744		13.8063	-39.044		13.7905	-36.838
13.8318	-37.919		13.8325	-36.518		13.84	-36.744		13.848	-39.043		13.8322	-36.836
13.8735	-37.918		13.8741	-36.518		13.8817	-36.744		13.8896	-39.043		13.8739	-36.834
13.9151	-37.918		13.9158	-36.518		13.9233	-36.744		13.9313	-39.042		13.9155	-36.832
13.9568	-37.917		13.9575	-36.518		13.965	-36.744		13.973	-39.041		13.9572	-36.83
13.9985	-37.917		13.9991	-36.518		14.0067	-36.744		14.0146	-39.041		13.9989	-36.827
14.0401	-37.916		14.0408	-36.518		14.0483	-36.744		14.0563	-39.04		14.0405	-36.825
14.0818	-37.916		14.0825	-36.518		14.09	-36.744		14.098	-39.039		14.0822	-36.823
14.1235	-37.915		14.1241	-36.518		14.1317	-36.744		14.1396	-39.039		14.1239	-36.821
14.1651	-37.914		14.1658	-36.518		14.1733	-36.744		14.1813	-39.038		14.1655	-36.819
14.2068	-37.914		14.2075	-36.518		14.215	-36.744		14.223	-39.038		14.2072	-36.817
14.2485	-37.913		14.2491	-36.518		14.2567	-36.744		14.2646	-39.037		14.2489	-36.816
14.2901	-37.913		14.2908	-36.518		14.2983	-36.744		14.3063	-39.037		14.2905	-36.814
14.3318	-37.912		14.3325	-36.518		14.34	-36.744		14.348	-39.036		14.3322	-36.812
14.3735	-37.912		14.3741	-36.518		14.3817	-36.744		14.3896	-39.036		14.3739	-36.811
14.4151	-37.912		14.4158	-36.518		14.4233	-36.744		14.4313	-39.036		14.4155	-36.809
14.4568	-37.912		14.4574	-36.518		14.465	-36.744		14.473	-39.036		14.4572	-36.808
14.4985	-37.911		14.4991	-36.518		14.5067	-36.744		14.5146	-39.035		14.4989	-36.807
14.5401	-37.911		14.5408	-36.518		14.5483	-36.744		14.5563	-39.035		14.5405	-36.806
14.5818	-37.911		14.5824	-36.518		14.59	-36.745		14.598	-39.035		14.5822	-36.804
14.6235	-37.911		14.6241	-36.518		14.6317	-36.745		14.6396	-39.035		14.6238	-36.803
14.6651	-37.911		14.6658	-36.519		14.6733	-36.745		14.6813	-39.034		14.6655	-36.802
14.7068	-37.91		14.7074	-36.519		14.715	-36.745		14.723	-39.034		14.7072	-36.801
14.7485	-37.91		14.7491	-36.519		14.7567	-36.745		14.7646	-39.034		14.7488	-36.799
14.7901	-37.91		14.7908	-36.519		14.7983	-36.745		14.8063	-39.033		14.7905	-36.798
14.8318	-37.91		14.8324	-36.52		14.84	-36.746		14.848	-39.033		14.8322	-36.797
14.8734	-37.91		14.8741	-36.52		14.8817	-36.746		14.8896	-39.033		14.8739	-36.795
14.9151	-37.909		14.9158	-36.521		14.9233	-36.746		14.9313	-39.033		14.9155	-36.794
14.9568	-37.909		14.9574	-36.521		14.965	-36.747		14.973	-39.032		14.9572	-36.793
14.9984	-37.909		14.9991	-36.522		15.0067	-36.747		15.0146	-39.032		14.9989	-36.791
15.0401	-37.909		15.0408	-36.523		15.0483	-36.748		15.0563	-39.032		15.0405	-36.79
15.0818	-37.909		15.0824	-36.523		15.09	-36.748		15.098	-39.032		15.0822	-36.789
15.1234	-37.909		15.1241	-36.524		15.1317	-36.749		15.1396	-39.032		15.1239	-36.788
15.1651	-37.909		15.1658	-36.525		15.1733	-36.751		15.1813	-39.031		15.1655	-36.788
15.2068	-37.909		15.2074	-36.527		15.215	-36.752		15.223	-39.031		15.2072	-36.787
15.2484	-37.908		15.2491	-36.528		15.2567	-36.753		15.2646	-39.031		15.2489	-36.786
15.2901	-37.908		15.2908	-36.53		15.2983	-36.754		15.3063	-39.031		15.2905	-36.785
15.3318	-37.908		15.3324	-36.532		15.34	-36.756		15.348	-39.031		15.3322	-36.784
15.3734	-37.908		15.3741	-36.534		15.3817	-36.758		15.3896	-39.03		15.3738	-36.783
15.4151	-37.908		15.4158	-36.536		15.4233	-36.759		15.4313	-39.03		15.4155	-36.782
15.4568	-37.908		15.4574	-36.538		15.465	-36.761		15.473	-39.03		15.4572	-36.781
15.4984	-37.908		15.4991	-36.541		15.5067	-36.763		15.5146	-39.03		15.4988	-36.781
15.5401	-37.908		15.5408	-36.544		15.5483	-36.765		15.5563	-39.03		15.5405	-36.78
15.5818	-37.908		15.5824	-36.546		15.59	-36.767		15.598	-39.029		15.5822	-36.779
15.6234	-37.908		15.6241	-36.549		15.6316	-36.769		15.6396	-39.029		15.6238	-36.778
15.6651	-37.908		15.6724	-36.552		15.6733	-36.772		15.6813	-39.029		15.6655	-36.777
15.7068	-37.908		15.7141	-36.555		15.715	-36.775		15.723	-39.029		15.7072	-36.777
15.7484	-37.908		15.7558	-36.558		15.7566	-36.778		15.7646	-39.029		15.7488	-36.776
15.7901	-37.908		15.7974	-36.561		15.7983	-36.781		15.8063	-39.029		15.7905	-36.775
15.8318	-37.908		15.8391	-36.564		15.84	-36.784		15.848	-39.029		15.8322	-36.775
15.8734	-37.908		15.8808	-36.567		15.8816	-36.788		15.8896	-39.028		15.8738	-36.774
15.9151	-37.908		15.9224	-36.571		15.9233	-36.791		15.9313	-39.028		15.9155	-36.774
15.9568	-37.909		15.9641	-36.574		15.965	-36.796		15.973	-39.028		15.9572	-36.773
15.9984	-37.909		16.0058	-36.578		16.0066	-36.799		16.0146	-39.028		15.9988	-36.772
16.0401	-37.909		16.0474	-36.582		16.0483	-36.803		16.0563	-39.028		16.0405	-36.772
16.0818	-37.909		16.0891	-36.587		16.09	-36.807		16.098	-39.028		16.0822	-36.771
16.1234	-37.909		16.1308	-36.591		16.1316	-36.811		16.1396	-39.027		16.1238	-36.77
16.1651	-37.909		16.1724	-36.596		16.1733	-36.815		16.1813	-39.027		16.1655	-36.77
16.2067	-37.909		16.2141	-36.601		16.215	-36.819		16.223	-39.027		16.2072	-36.769
16.2484	-37.909		16.2558	-36.607		16.2566	-36.823		16.2646	-39.027		16.2488	-36.768
16.2901	-37.91		16.2974	-36.612		16.2983	-36.826		16.3063	-39.027		16.2905	-36.767
16.3317	-37.91		16.3391	-36.618		16.34	-36.83		16.348	-39.027		16.3322	-36.767
16.3734	-37.91		16.3808	-36.624		16.3816	-36.834		16.3896	-39.026		16.3738	-36.766
16.4151	-37.91		16.4224	-36.629		16.4233	-36.838		16.4313	-39.026		16.4155	-36.766
16.4567	-37.91		16.4641	-36.635		16.465	-36.842		16.473	-39.026		16.4572	-36.765
16.4984	-37.911		16.5058	-36.641		16.5066	-36.846		16.5146	-39.026		16.4988	-36.765
16.5401	-37.911		16.5474	-36.646		16.5483	-36.851		16.5563	-39.026		16.5405	-36.764
16.5818	-37.911		16.5891	-36.651		16.59	-36.856		16.598	-39.026		16.5822	-36.764
16.6234	-37.912		16.6308	-36.656		16.6316	-36.861		16.6396	-39.026		16.6238	-36.764
16.6651	-37.912		16.6724	-36.662		16.6733	-36.866		16.6813	-39.026		16.6655	-36.764
16.7067	-37.913		16.7141	-36.667		16.715	-36.871		16.723	-39.026		16.7072	-36.763
16.7484	-37.913		16.7558	-36.672		16.7566	-36.877		16.7646	-39.026		16.7488	-36.763
16.7901	-37.914		16.7974	-36.677		16.7983	-36.882		16.8063	-39.026		16.7905	-36.763
16.8317	-37.915		16.8391	-36.683		16.84	-36.888		16.848	-39.026		16.8322	-36.762
16.8734	-37.915		16.8807	-36.689		16.8816	-36.894		16.8896	-39.026		16.8738	-36.762
16.9151	-37.916		16.9224	-36.695		16.9233	-36.9		16.9313	-39.026		16.9155	-36.762
16.9567	-37.916		16.9641	-36.701		16.965	-36.905		16.9729	-39.026		16.9572	-36.762
16.9984	-37.917		17.0057	-36.707		17.0066	-36.911		17.0146	-39.025		16.9988	-36.761
17.0401	-37.918		17.0474	-36.713		17.0483	-36.916		17.0563	-39.025		17.0472	-36.761
17.0817	-37.919		17.0891	-36.719		17.09	-36.921		17.098	-39.025		17.0888	-36.761
17.1234	-37.92		17.1307	-36.726		17.1316	-36.926		17.1396	-39.025		17.1305	-36.76
17.1651	-37.921		17.1724	-36.733		17.1733	-36.932		17.1813	-39.025		17.1721	-36.76
17.2067	-37.923		17.2141	-36.74		17.215	-36.936		17.223	-39.025		17.2138	-36.76
17.2484	-37.925		17.2557	-36.747		17.2566	-36.941		17.2646	-39.025		17.2555	-36.76
17.2901	-37.928		17.2974	-36.754		17.2983	-36.946		17.3063	-39.025		17.2971	-36.76
17.3317	-37.93		17.3391	-36.76		17.34	-36.952		17.3479	-39.025		17.3388	-36.759
17.3734	-37.932		17.3807	-36.766		17.3816	-36.957		17.3896	-39.025		17.3805	-36.759
17.4151	-37.935		17.4224	-36.772		17.4233	-36.963		17.4313	-39.025		17.4221	-36.759
17.4567	-37.937		17.4641	-36.778		17.465	-36.969		17.4729	-39.025		17.4638	-36.759
17.4984	-37.939		17.5057	-36.784		17.5066	-36.975		17.5146	-39.025		17.5055	-36.758
17.5401	-37.942		17.5474	-36.79		17.5483	-36.981		17.5563	-39.025		17.5471	-36.758
17.5817	-37.944		17.5891	-36.796		17.59	-36.987		17.5979	-39.025		17.5888	-36.758
17.6234	-37.946		17.6307	-36.802		17.6316	-36.994		17.6396	-39.025		17.6305	-36.757
17.6651	-37.949		17.6724	-36.807		17.6733	-37.001		17.6813	-39.025		17.6721	-36.757
17.7067	-37.951		17.7141	-36.813		17.715	-37.007		17.7229	-39.025		17.7138	-36.757
17.7484	-37.954		17.7557	-36.819		17.7566	-37.014		17.7646	-39.025		17.7555	-36.757
17.7901	-37.956		17.7974	-36.824		17.7983	-37.02		17.8063	-39.025		17.7971	-36.757
17.8317	-37.959		17.8391	-36.83		17.84	-37.026		17.8479	-39.025		17.8388	-36.756
17.8734	-37.962		17.8807	-36.837		17.8816	-37.032		17.8896	-39.025		17.8805	-36.756
17.9151	-37.965		17.9224	-36.843		17.9233	-37.038		17.9313	-39.025		17.9221	-36.756
17.9567	-37.968		17.9641	-36.85		17.965	-37.043		17.9729	-39.025		17.9638	-36.756
17.9984	-37.972		18.0057	-36.857		18.0066	-37.049		18.0146	-39.025		18.0055	-36.756
18.0401	-37.976		18.0474	-36.864		18.0483	-37.054		18.0563	-39.025		18.0471	-36.756
18.0817	-37.98		18.0891	-36.872		18.09	-37.06		18.0979	-39.025		18.0888	-36.756
18.1234	-37.984		18.1307	-36.879		18.1316	-37.065		18.1396	-39.025		18.1305	-36.755
18.1651	-37.987		18.1724	-36.887		18.1733	-37.07		18.1813	-39.025		18.1721	-36.755
18.2067	-37.99		18.2141	-36.894		18.215	-37.075		18.2229	-39.025		18.2138	-36.755
18.2484	-37.993		18.2557	-36.902		18.2566	-37.081		18.2646	-39.025		18.2555	-36.755
18.2901	-37.997		18.2974	-36.91		18.2983	-37.087		18.3063	-39.025		18.2971	-36.755
18.3317	-37.999		18.3391	-36.917		18.34	-37.092		18.3479	-39.025		18.3388	-36.755
18.3734	-38.002		18.3808	-36.925		18.3816	-37.098		18.3896	-39.025		18.3805	-36.754
18.4151	-38.005		18.4224	-36.932		18.4233	-37.104		18.4313	-39.025		18.4221	-36.754
18.4567	-38.008		18.4641	-36.939		18.4649	-37.11		18.4729	-39.025		18.4638	-36.754
18.4984	-38.011		18.5058	-36.946		18.5066	-37.117		18.5146	-39.025		18.5055	-36.754
18.5401	-38.014		18.5474	-36.953		18.5483	-37.124		18.5563	-39.025		18.5471	-36.754
18.5817	-38.017		18.5891	-36.959		18.59	-37.131		18.598	-39.025		18.5888	-36.754
18.6234	-38.021		18.6308	-36.966		18.6316	-37.138		18.6396	-39.025		18.6305	-36.754
18.6651	-38.024		18.6724	-36.973		18.6733	-37.145		18.6896	-39.025		18.6721	-36.754
18.7067	-38.027		18.7141	-36.98		18.7149	-37.152		18.7313	-39.025		18.7138	-36.754
18.7484	-38.03		18.7558	-36.987		18.7566	-37.159		18.773	-39.025		18.7555	-36.754
18.7901	-38.034		18.7974	-36.994		18.7983	-37.166		18.8146	-39.025		18.7971	-36.753
18.8317	-38.037		18.8391	-37.001		18.8399	-37.172		18.8563	-39.025		18.8388	-36.753
18.8734	-38.041		18.8807	-37.008		18.8816	-37.179		18.898	-39.025		18.8805	-36.753
18.9151	-38.045		18.9224	-37.015		18.9233	-37.186		18.9396	-39.025		18.9221	-36.753
18.9567	-38.05		18.9641	-37.023		18.9649	-37.191		18.9813	-39.025		18.9638	-36.753
18.9984	-38.054		19.0057	-37.03		19.0066	-37.197		19.023	-39.025		19.0055	-36.753
19.0401	-38.058		19.0474	-37.038		19.0483	-37.203		19.0646	-39.025		19.0471	-36.753
19.0817	-38.061		19.0891	-37.046		19.0899	-37.209		19.1063	-39.025		19.0888	-36.753
19.1234	-38.065		19.1307	-37.054		19.1316	-37.215		19.1479	-39.025		19.1305	-36.753
19.1651	-38.068		19.1724	-37.062		19.1733	-37.221		19.1896	-39.025		19.1721	-36.753
19.2067	-38.071		19.2141	-37.07		19.2149	-37.226		19.2313	-39.025		19.2138	-36.753
19.2484	-38.074		19.2557	-37.078		19.2566	-37.233		19.2729	-39.025		19.2555	-36.753
19.2901	-38.078		19.2974	-37.086		19.2983	-37.239		19.3146	-39.025		19.2971	-36.753
19.3317	-38.081		19.3391	-37.093		19.3399	-37.245		19.3563	-39.025		19.3388	-36.753
19.3734	-38.085		19.3807	-37.101		19.3816	-37.251		19.3979	-39.025		19.3805	-36.753
19.4151	-38.088		19.4224	-37.108		19.4233	-37.258		19.4396	-39.024		19.4221	-36.753
19.4567	-38.092		19.4641	-37.115		19.4649	-37.265		19.4813	-39.024		19.4638	-36.753
19.4984	-38.096		19.5057	-37.123		19.5066	-37.272		19.5229	-39.024		19.5055	-36.753
19.5401	-38.101		19.5474	-37.13		19.5483	-37.279		19.5646	-39.024		19.5471	-36.753
19.5817	-38.105		19.5891	-37.137		19.5899	-37.285		19.6063	-39.024		19.5888	-36.753
19.6234	-38.109		19.6307	-37.143		19.6316	-37.292		19.6479	-39.024		19.6305	-36.753
19.6651	-38.113		19.6724	-37.15		19.6733	-37.3		19.6896	-39.024		19.6721	-36.753
19.7067	-38.117		19.7141	-37.156		19.7149	-37.306		19.7313	-39.024		19.7138	-36.753
19.7484	-38.122		19.7557	-37.162		19.7566	-37.313		19.7729	-39.024		19.7555	-36.753
19.7901	-38.126		19.7974	-37.169		19.7983	-37.319		19.8146	-39.024		19.7971	-36.753
19.8317	-38.13		19.8391	-37.175		19.8399	-37.325		19.8563	-39.023		19.8388	-36.753
19.8801	-38.135		19.8807	-37.182		19.8816	-37.331		19.8979	-39.023		19.8805	-36.753
19.9217	-38.139		19.9224	-37.188		19.9233	-37.337		19.9396	-39.023		19.9221	-36.753
19.9634	-38.143		19.9641	-37.196		19.9649	-37.343		19.9813	-39.023		19.9638	-36.753
20.0051	-38.147		20.0057	-37.203		20.0066	-37.349		20.0229	-39.023		20.0055	-36.753
20.0467	-38.151		20.0474	-37.211		20.0483	-37.354		20.0646	-39.023		20.0471	-36.753
20.0884	-38.154		20.0891	-37.219		20.0899	-37.36		20.1063	-39.023		20.0888	-36.753
20.1301	-38.157		20.1307	-37.227		20.1316	-37.365		20.1479	-39.023		20.1305	-36.753
20.1717	-38.16		20.1724	-37.235		20.1733	-37.371		20.1896	-39.022		20.1721	-36.753
20.2134	-38.163		20.2141	-37.243		20.2149	-37.377		20.2313	-39.022		20.2138	-36.753
20.2551	-38.166		20.2557	-37.251		20.2566	-37.383		20.2729	-39.022		20.2555	-36.753
20.2967	-38.17		20.2974	-37.259		20.2983	-37.39		20.3146	-39.022		20.2971	-36.753
20.3384	-38.174		20.3391	-37.266		20.3399	-37.396		20.3563	-39.022		20.3388	-36.753
20.3801	-38.178		20.3807	-37.273		20.3816	-37.403		20.3979	-39.021		20.3805	-36.753
20.4217	-38.182		20.4224	-37.28		20.4232	-37.41		20.4396	-39.021		20.4221	-36.753
20.4634	-38.186		20.4641	-37.287		20.4649	-37.417		20.4812	-39.021		20.4638	-36.753
20.505	-38.19		20.5057	-37.293		20.5066	-37.424		20.5229	-39.021		20.5055	-36.753
20.5467	-38.195		20.5474	-37.299		20.5482	-37.431		20.5646	-39.02		20.5471	-36.753
20.5884	-38.199		20.5891	-37.306		20.5899	-37.438		20.6062	-39.02		20.5888	-36.753
20.63	-38.204		20.6307	-37.312		20.6316	-37.445		20.6479	-39.02		20.6305	-36.753
20.6717	-38.208		20.6724	-37.318		20.6816	-37.453		20.6896	-39.019		20.6721	-36.753
20.7134	-38.212		20.7141	-37.324		20.7299	-37.461		20.7312	-39.019		20.7138	-36.753
20.755	-38.216		20.7557	-37.33		20.7716	-37.467		20.7729	-39.019		20.7555	-36.753
20.7967	-38.22		20.7974	-37.337		20.8133	-37.474		20.8146	-39.018		20.7971	-36.753
20.8384	-38.224		20.8391	-37.343		20.8549	-37.48		20.8562	-39.018		20.8388	-36.753
20.88	-38.228		20.8807	-37.35		20.8966	-37.486		20.8979	-39.018		20.8804	-36.753
20.9217	-38.232		20.9224	-37.357		20.9383	-37.492		20.9396	-39.017		20.9221	-36.753
20.9634	-38.236		20.9641	-37.363		20.9799	-37.498		20.9812	-39.016		20.9638	-36.753
21.005	-38.239		21.0057	-37.371		21.0216	-37.504		21.0229	-39.016		21.0054	-36.753
21.0467	-38.243		21.0474	-37.378		21.0632	-37.51		21.0646	-39.015		21.0471	-36.753
21.0884	-38.248		21.089	-37.386		21.1049	-37.517		21.1062	-39.014		21.0888	-36.753
21.13	-38.252		21.1307	-37.394		21.1466	-37.524		21.1479	-39.014		21.1304	-36.753
21.1717	-38.256		21.1724	-37.402		21.1882	-37.531		21.1896	-39.013		21.1721	-36.753
21.2134	-38.261		21.214	-37.41		21.2299	-37.538		21.2312	-39.012		21.2138	-36.753
21.255	-38.266		21.2557	-37.418		21.2716	-37.545		21.2729	-39.011		21.2554	-36.753
21.2967	-38.271		21.2974	-37.425		21.3132	-37.552		21.3146	-39.01		21.2971	-36.753
21.3384	-38.276		21.339	-37.432		21.3549	-37.559		21.3562	-39.009		21.3388	-36.753
21.38	-38.282		21.3807	-37.44		21.3966	-37.567		21.3979	-39.008		21.3804	-36.753
21.4217	-38.287		21.4224	-37.447		21.4382	-37.574		21.4396	-39.007		21.4221	-36.753
21.4634	-38.292		21.464	-37.455		21.4799	-37.581		21.4812	-39.005		21.4638	-36.753
21.505	-38.298		21.5057	-37.462		21.5216	-37.589		21.5229	-39.004		21.5054	-36.753
21.5467	-38.304		21.5474	-37.469		21.5632	-37.597		21.5646	-39.002		21.5471	-36.753
21.5884	-38.31		21.589	-37.475		21.6049	-37.604		21.6062	-39		21.5888	-36.753
21.63	-38.316		21.6307	-37.482		21.6466	-37.611		21.6479	-38.998		21.6304	-36.753
21.6717	-38.322		21.6724	-37.489		21.6882	-37.618		21.6896	-38.996		21.6721	-36.753
21.7133	-38.328		21.714	-37.495		21.7299	-37.625		21.7312	-38.994		21.7138	-36.753
21.755	-38.333		21.7557	-37.502		21.7716	-37.632		21.7729	-38.993		21.7554	-36.753
21.7967	-38.338		21.7974	-37.51		21.8132	-37.638		21.8146	-38.991		21.7971	-36.753
21.8383	-38.343		21.839	-37.517		21.8549	-37.644		21.8562	-38.989		21.8388	-36.753
21.88	-38.348		21.8807	-37.524		21.8966	-37.65		21.8979	-38.987		21.8804	-36.754
21.9217	-38.354		21.9224	-37.532		21.9382	-37.656		21.9396	-38.986		21.9221	-36.754
21.9633	-38.359		21.964	-37.54		21.9799	-37.662		21.9812	-38.984		21.9638	-36.754
22.005	-38.364		22.0057	-37.548		22.0216	-37.669		22.0229	-38.982		22.0054	-36.754
22.0467	-38.37		22.0474	-37.556		22.0632	-37.675		22.0646	-38.98		22.0471	-36.754
22.0883	-38.375		22.0973	-37.566		22.1132	-37.682		22.1146	-38.977		22.0888	-36.754
22.13	-38.382		22.139	-37.575		22.1549	-37.689		22.1562	-38.975		22.1304	-36.754
22.1717	-38.388		22.1807	-37.583		22.1966	-37.696		22.1979	-38.972		22.1721	-36.754
22.2133	-38.395		22.2223	-37.592		22.2382	-37.703		22.2396	-38.969		22.2138	-36.755
22.255	-38.401		22.264	-37.6		22.2799	-37.711		22.2812	-38.965		22.2554	-36.755
22.2967	-38.407		22.3057	-37.608		22.3216	-37.719		22.3229	-38.962		22.2971	-36.755
22.3383	-38.414		22.3473	-37.616		22.3632	-37.726		22.3645	-38.959		22.3388	-36.755
22.38	-38.42		22.389	-37.624		22.4049	-37.734		22.4062	-38.955		22.3804	-36.755
22.4217	-38.426		22.4307	-37.631		22.4465	-37.742		22.4479	-38.952		22.4221	-36.755
22.4633	-38.432		22.4723	-37.639		22.4882	-37.75		22.4895	-38.948		22.4638	-36.755
22.505	-38.438		22.514	-37.646		22.5299	-37.758		22.5312	-38.944		22.5054	-36.756
22.5467	-38.444		22.5557	-37.653		22.5715	-37.766		22.5729	-38.941		22.5471	-36.756
22.5883	-38.449		22.5973	-37.66		22.6132	-37.773		22.6145	-38.936		22.5888	-36.756
22.63	-38.455		22.639	-37.667		22.6549	-37.781		22.6562	-38.932		22.6304	-36.756
22.6717	-38.461		22.6807	-37.674		22.6965	-37.788		22.6979	-38.927		22.6721	-36.756
22.7133	-38.466		22.7223	-37.681		22.7382	-37.795		22.7395	-38.922		22.7138	-36.756
22.755	-38.472		22.764	-37.689		22.7799	-37.802		22.7812	-38.917		22.7554	-36.757
22.7967	-38.479		22.8057	-37.697		22.8215	-37.809		22.8229	-38.911		22.7971	-36.757
22.8383	-38.485		22.8473	-37.705		22.8632	-37.816		22.8645	-38.906		22.8388	-36.757
22.88	-38.492		22.889	-37.712		22.9049	-37.822		22.9062	-38.901		22.8804	-36.757
22.9217	-38.499		22.9307	-37.72		22.9465	-37.829		22.9479	-38.896		22.9221	-36.757
22.9633	-38.506		22.9723	-37.727		22.9882	-37.836		22.9895	-38.891		22.9638	-36.757
23.005	-38.514		23.014	-37.735		23.0299	-37.843		23.0379	-38.886		23.0054	-36.757
23.0467	-38.523		23.0557	-37.742		23.0715	-37.85		23.0812	-38.881		23.0471	-36.758
23.0883	-38.531		23.0973	-37.75		23.1132	-37.857		23.1295	-38.875		23.0888	-36.758
23.13	-38.539		23.139	-37.758		23.1549	-37.864		23.1712	-38.871		23.1304	-36.758
23.1717	-38.546		23.1807	-37.766		23.1965	-37.872		23.2129	-38.866		23.1721	-36.758
23.2133	-38.553		23.2223	-37.773		23.2382	-37.88		23.2545	-38.861		23.2138	-36.758
23.255	-38.56		23.264	-37.78		23.2799	-37.888		23.2962	-38.857		23.2554	-36.759
23.2967	-38.566		23.3057	-37.786		23.3215	-37.896		23.3379	-38.852		23.2971	-36.759
23.3383	-38.572		23.3473	-37.793		23.3632	-37.905		23.3795	-38.847		23.3387	-36.759
23.38	-38.578		23.389	-37.799		23.4049	-37.913		23.4212	-38.842		23.3804	-36.759
23.4216	-38.584		23.4307	-37.806		23.4465	-37.922		23.4628	-38.837		23.4221	-36.759
23.4633	-38.59		23.4723	-37.812		23.4882	-37.93		23.5045	-38.833		23.4637	-36.76
23.505	-38.596		23.514	-37.818		23.5299	-37.938		23.5462	-38.828		23.5054	-36.76
23.5466	-38.602		23.5556	-37.823		23.5715	-37.946		23.5878	-38.823		23.5471	-36.76
23.5883	-38.607		23.5973	-37.829		23.6132	-37.953		23.6295	-38.819		23.5888	-36.76
23.63	-38.613		23.639	-37.835		23.6549	-37.96		23.6712	-38.814		23.6304	-36.761
23.6717	-38.618		23.6806	-37.841		23.6965	-37.967		23.7128	-38.81		23.6721	-36.761
23.7133	-38.624		23.7223	-37.848		23.7382	-37.975		23.7545	-38.805		23.7138	-36.761
23.755	-38.629		23.764	-37.854		23.7798	-37.982		23.7962	-38.801		23.7554	-36.761
23.7966	-38.635		23.8056	-37.861		23.8215	-37.988		23.8378	-38.796		23.7971	-36.762
23.8383	-38.641		23.8473	-37.868		23.8632	-37.995		23.8795	-38.791		23.8388	-36.762
23.88	-38.648		23.889	-37.875		23.9048	-38.001		23.9212	-38.786		23.8804	-36.762
23.9216	-38.654		23.9306	-37.882		23.9465	-38.007		23.9628	-38.781		23.9221	-36.762
23.9633	-38.66		23.9723	-37.89		23.9882	-38.014		24.0045	-38.776		23.9637	-36.763
24.005	-38.666		24.014	-37.898		24.0298	-38.021		24.0462	-38.771		24.0054	-36.763
24.0466	-38.672		24.0556	-37.907		24.0715	-38.028		24.0878	-38.766		24.0471	-36.763
24.0883	-38.678		24.0973	-37.916		24.1132	-38.035		24.1295	-38.762		24.0887	-36.764
24.13	-38.684		24.139	-37.924		24.1548	-38.042		24.1712	-38.757		24.1304	-36.764
24.1716	-38.689		24.1806	-37.933		24.1965	-38.05		24.2129	-38.751		24.1721	-36.764
24.2133	-38.695		24.2223	-37.942		24.2382	-38.058		24.2545	-38.746		24.2137	-36.765
24.255	-38.7		24.264	-37.949		24.2798	-38.067		24.2962	-38.74		24.2554	-36.765
24.2966	-38.704		24.3056	-37.957		24.3215	-38.075		24.3379	-38.735		24.2971	-36.765
24.3383	-38.709		24.3473	-37.965		24.3632	-38.084		24.3795	-38.728		24.3387	-36.765
24.38	-38.714		24.389	-37.973		24.4048	-38.092		24.4212	-38.722		24.3804	-36.766
24.4216	-38.719		24.4306	-37.98		24.4465	-38.1		24.4629	-38.715		24.4221	-36.766
24.4633	-38.723		24.4723	-37.987		24.4882	-38.109		24.5045	-38.709		24.4637	-36.766
24.505	-38.728		24.514	-37.994		24.5298	-38.118		24.5462	-38.703		24.5054	-36.767
24.5466	-38.734		24.5556	-38.001		24.5715	-38.126		24.5879	-38.696		24.5471	-36.767
24.5883	-38.738		24.5973	-38.008		24.6132	-38.134		24.6295	-38.69		24.5887	-36.767
24.63	-38.743		24.639	-38.016		24.6548	-38.142		24.6712	-38.684		24.6304	-36.768
24.6716	-38.748		24.6806	-38.023		24.6965	-38.149		24.7129	-38.678		24.6721	-36.768
24.7133	-38.753		24.7223	-38.031		24.7382	-38.156		24.7545	-38.672		24.7137	-36.769
24.755	-38.758		24.764	-38.038		24.7798	-38.163		24.7962	-38.666		24.7554	-36.769
24.7966	-38.763		24.8056	-38.046		24.8215	-38.17		24.8378	-38.66		24.7971	-36.77
24.8383	-38.768		24.8473	-38.053		24.8632	-38.177		24.8795	-38.654		24.8387	-36.77
24.88	-38.773		24.889	-38.061		24.9048	-38.184		24.9212	-38.647		24.8804	-36.771
24.9216	-38.778		24.9306	-38.069		24.9465	-38.191		24.9629	-38.641		24.9221	-36.772
24.9633	-38.784		24.9723	-38.076		24.9882	-38.198		25.0045	-38.634		24.9637	-36.772
25.005	-38.789		25.014	-38.085		25.0298	-38.205		25.0462	-38.628		25.0054	-36.773
25.0466	-38.795		25.0556	-38.093		25.0715	-38.213		25.0879	-38.623		25.0471	-36.773
25.0883	-38.8		25.0973	-38.102		25.1132	-38.22		25.1295	-38.617		25.0887	-36.774
25.13	-38.805		25.139	-38.11		25.1548	-38.228		25.1712	-38.613		25.1304	-36.775
25.1716	-38.811		25.1806	-38.117		25.1965	-38.236		25.2129	-38.609		25.1721	-36.775
25.2133	-38.817		25.2223	-38.125		25.2382	-38.244		25.2545	-38.604		25.2137	-36.776
25.255	-38.822		25.264	-38.133		25.2798	-38.252		25.2962	-38.601		25.2554	-36.777
25.2966	-38.827		25.3056	-38.14		25.3215	-38.261		25.3379	-38.597		25.2971	-36.777
25.3383	-38.832		25.3473	-38.147		25.3632	-38.269		25.3795	-38.593		25.3387	-36.778
25.38	-38.836		25.389	-38.154		25.4048	-38.277		25.4212	-38.589		25.3804	-36.779
25.4216	-38.841		25.4306	-38.161		25.4465	-38.286		25.4629	-38.585		25.4221	-36.78
25.4633	-38.846		25.4723	-38.168		25.4882	-38.293		25.5045	-38.582		25.4637	-36.78
25.505	-38.851		25.514	-38.174		25.5298	-38.301		25.5462	-38.577		25.5054	-36.781
25.5466	-38.856		25.5556	-38.18		25.5715	-38.309		25.5879	-38.574		25.5471	-36.782
25.5883	-38.861		25.5973	-38.186		25.6132	-38.316		25.6295	-38.57		25.5887	-36.783
25.63	-38.867		25.639	-38.193		25.6548	-38.324		25.6712	-38.567		25.6304	-36.783
25.6716	-38.873		25.6806	-38.199		25.6965	-38.331		25.7129	-38.564		25.6721	-36.784
25.7133	-38.879		25.7223	-38.205		25.7382	-38.338		25.7545	-38.561		25.7137	-36.784
25.755	-38.886		25.764	-38.212		25.7798	-38.344		25.7962	-38.558		25.7554	-36.785
25.7966	-38.893		25.8056	-38.219		25.8215	-38.35		25.8379	-38.555		25.7971	-36.785
25.8383	-38.899		25.8473	-38.226		25.8632	-38.356		25.8795	-38.552		25.8387	-36.786
25.88	-38.906		25.889	-38.233		25.9048	-38.362		25.9212	-38.55		25.8804	-36.787
25.9216	-38.913		25.9306	-38.241		25.9465	-38.369		25.9628	-38.547		25.9221	-36.787
25.9633	-38.92		25.9723	-38.249		25.9882	-38.375		26.0045	-38.544		25.9637	-36.788
26.005	-38.927		26.014	-38.256		26.0298	-38.382		26.0462	-38.541		26.0054	-36.789
26.0466	-38.934		26.0556	-38.264		26.0715	-38.389		26.0879	-38.538		26.0471	-36.79
26.0883	-38.941		26.0973	-38.272		26.1132	-38.395		26.1295	-38.536		26.0887	-36.791
26.13	-38.947		26.139	-38.28		26.1548	-38.402		26.1712	-38.533		26.1304	-36.791
26.1716	-38.953		26.1806	-38.288		26.1965	-38.41		26.2129	-38.53		26.1721	-36.792
26.2133	-38.959		26.2223	-38.295		26.2382	-38.418		26.2545	-38.528		26.2137	-36.793
26.255	-38.965		26.264	-38.303		26.2798	-38.425		26.2962	-38.525		26.2554	-36.794
26.2966	-38.971		26.3056	-38.31		26.3215	-38.433		26.3379	-38.523		26.2971	-36.794
26.3383	-38.978		26.3473	-38.317		26.3632	-38.442		26.3795	-38.521		26.3387	-36.795
26.38	-38.984		26.389	-38.324		26.4048	-38.45		26.4212	-38.519		26.3804	-36.795
26.4216	-38.991		26.4306	-38.33		26.4465	-38.458		26.4628	-38.518		26.4221	-36.796
26.4633	-38.997		26.4723	-38.337		26.4882	-38.465		26.5045	-38.516		26.4637	-36.796
26.505	-39.003		26.514	-38.344		26.5298	-38.473		26.5462	-38.515		26.5054	-36.797
26.5466	-39.01		26.5556	-38.351		26.5715	-38.481		26.5878	-38.513		26.5471	-36.798
26.5883	-39.016		26.5973	-38.358		26.6132	-38.488		26.6295	-38.511		26.5887	-36.798
26.63	-39.022		26.639	-38.365		26.6548	-38.494		26.6712	-38.509		26.6304	-36.799
26.6716	-39.029		26.6806	-38.373		26.6965	-38.501		26.7128	-38.507		26.6721	-36.8
26.7133	-39.035		26.7223	-38.379		26.7382	-38.507		26.7545	-38.505		26.7137	-36.8
26.755	-39.04		26.764	-38.386		26.7798	-38.514		26.7962	-38.503		26.7554	-36.801
26.7966	-39.046		26.8056	-38.394		26.8215	-38.52		26.8378	-38.501		26.7971	-36.802
26.8383	-39.052		26.8473	-38.401		26.8632	-38.527		26.8795	-38.499		26.8387	-36.802
26.88	-39.057		26.889	-38.409		26.9048	-38.533		26.9212	-38.498		26.8804	-36.803
26.9216	-39.063		26.9306	-38.418		26.9465	-38.54		26.9628	-38.496		26.9221	-36.804
26.9633	-39.068		26.9723	-38.425		26.9882	-38.546		27.0045	-38.494		26.9637	-36.804
27.005	-39.073		27.014	-38.433		27.0298	-38.553		27.0462	-38.493		27.0054	-36.805
27.0466	-39.077		27.0556	-38.441		27.0715	-38.56		27.0878	-38.491		27.047	-36.805
27.0883	-39.081		27.0973	-38.449		27.1132	-38.568		27.1295	-38.489		27.0887	-36.806
27.13	-39.085		27.139	-38.456		27.1548	-38.575		27.1712	-38.487		27.1304	-36.806
27.1716	-39.09		27.1806	-38.464		27.1965	-38.583		27.2128	-38.485		27.172	-36.807
27.2133	-39.095		27.2223	-38.471		27.2382	-38.59		27.2545	-38.483		27.2137	-36.807
27.255	-39.099		27.264	-38.479		27.2798	-38.598		27.2962	-38.481		27.2554	-36.807
27.2966	-39.104		27.3056	-38.486		27.3215	-38.605		27.3378	-38.479		27.297	-36.808
27.3383	-39.109		27.3473	-38.493		27.3632	-38.613		27.3795	-38.476		27.3387	-36.809
27.38	-39.114		27.389	-38.5		27.4048	-38.62		27.4212	-38.474		27.3804	-36.809
27.4216	-39.119		27.4306	-38.507		27.4465	-38.627		27.4628	-38.472		27.422	-36.81
27.4633	-39.125		27.4723	-38.514		27.4882	-38.633		27.5045	-38.47		27.4637	-36.811
27.505	-39.131		27.514	-38.521		27.5298	-38.64		27.5462	-38.468		27.5054	-36.811
27.5466	-39.136		27.5556	-38.528		27.5715	-38.646		27.5878	-38.466		27.547	-36.812
27.5883	-39.142		27.5973	-38.535		27.6132	-38.653		27.6295	-38.464		27.5887	-36.813
27.63	-39.148		27.639	-38.542		27.6548	-38.659		27.6712	-38.462		27.6304	-36.813
27.6716	-39.153		27.6806	-38.55		27.6965	-38.665		27.7128	-38.46		27.672	-36.814
27.7133	-39.159		27.7223	-38.557		27.7382	-38.671		27.7545	-38.458		27.7137	-36.814
27.755	-39.164		27.764	-38.565		27.7798	-38.677		27.7962	-38.456		27.7554	-36.815
27.805	-39.17		27.8056	-38.573		27.8215	-38.684		27.8378	-38.453		27.797	-36.815
27.8466	-39.175		27.8473	-38.581		27.8632	-38.69		27.8795	-38.451		27.8387	-36.816
27.8883	-39.179		27.8889	-38.589		27.9048	-38.697		27.9212	-38.449		27.8804	-36.816
27.93	-39.184		27.9306	-38.598		27.9465	-38.704		27.9628	-38.446		27.922	-36.817
27.9716	-39.188		27.9723	-38.606		27.9881	-38.711		28.0045	-38.444		27.9637	-36.817
28.0133	-39.193		28.014	-38.614		28.0298	-38.719		28.0462	-38.441		28.0054	-36.818
28.055	-39.197		28.0556	-38.621		28.0715	-38.726		28.0878	-38.438		28.047	-36.818
28.0966	-39.202		28.0973	-38.628		28.1131	-38.734		28.1295	-38.436		28.0887	-36.819
28.1383	-39.207		28.1389	-38.636		28.1548	-38.742		28.1712	-38.433		28.1304	-36.819
28.1799	-39.212		28.1806	-38.643		28.1965	-38.75		28.2128	-38.43		28.172	-36.82
28.2216	-39.217		28.2223	-38.65		28.2382	-38.757		28.2545	-38.427		28.2204	-36.82
28.2633	-39.221		28.2639	-38.657		28.2798	-38.765		28.2962	-38.424		28.262	-36.82
28.3049	-39.226		28.3056	-38.663		28.3215	-38.773		28.3378	-38.42		28.3037	-36.821
28.3466	-39.231		28.3473	-38.67		28.3632	-38.78		28.3795	-38.417		28.3454	-36.821
28.3883	-39.235		28.389	-38.677		28.4048	-38.788		28.4212	-38.414		28.387	-36.821
28.43	-39.239		28.4306	-38.683		28.4465	-38.795		28.4628	-38.41		28.4287	-36.822
28.4716	-39.244		28.4723	-38.691		28.4882	-38.801		28.5045	-38.405		28.4704	-36.822
28.5133	-39.248		28.5139	-38.698		28.5298	-38.808		28.5462	-38.401		28.512	-36.822
28.5549	-39.253		28.5556	-38.706		28.5715	-38.815		28.5878	-38.397		28.5537	-36.822
28.5966	-39.258		28.5973	-38.714		28.6132	-38.821		28.6295	-38.393		28.5954	-36.822
28.6383	-39.263		28.6389	-38.723		28.6548	-38.827		28.6712	-38.389		28.637	-36.823
28.68	-39.267		28.6806	-38.733		28.6965	-38.834		28.7128	-38.386		28.6787	-36.823
28.7216	-39.272		28.7223	-38.744		28.7382	-38.84		28.7545	-38.382		28.7204	-36.823
28.7633	-39.276		28.7639	-38.756		28.7798	-38.847		28.7962	-38.379		28.762	-36.824
28.805	-39.281		28.8056	-38.767		28.8215	-38.854		28.8378	-38.375		28.8037	-36.824
28.8466	-39.285		28.8473	-38.777		28.8632	-38.861		28.8795	-38.372		28.8454	-36.824
28.8883	-39.29		28.8889	-38.787		28.9048	-38.867		28.9212	-38.368		28.887	-36.824
28.9299	-39.295		28.9306	-38.796		28.9465	-38.874		28.9628	-38.365		28.9287	-36.825
28.9716	-39.3		28.9723	-38.805		28.9882	-38.882		29.0045	-38.361		28.9704	-36.825
29.0133	-39.305		29.0139	-38.812		29.0298	-38.889		29.0462	-38.358		29.012	-36.825
29.0549	-39.31		29.0556	-38.819		29.0715	-38.896		29.0878	-38.354		29.0537	-36.825
29.0966	-39.315		29.0973	-38.826		29.1132	-38.904		29.1295	-38.351		29.0954	-36.825
29.1383	-39.321		29.1389	-38.833		29.1548	-38.91		29.1712	-38.349		29.137	-36.825
29.1799	-39.326		29.1806	-38.838		29.1965	-38.917		29.2128	-38.346		29.1787	-36.826
29.2216	-39.332		29.2223	-38.844		29.2381	-38.924		29.2545	-38.344		29.2203	-36.826
29.2633	-39.337		29.2639	-38.848		29.2798	-38.93		29.2961	-38.341		29.262	-36.826
29.3049	-39.342		29.3056	-38.853		29.3215	-38.936		29.3378	-38.339		29.3037	-36.826
29.3466	-39.347		29.3473	-38.857		29.3631	-38.942		29.3795	-38.337		29.3453	-36.826
29.3883	-39.352		29.3889	-38.861		29.4048	-38.948		29.4211	-38.335		29.387	-36.827
29.4299	-39.356		29.4306	-38.865		29.4465	-38.954		29.4628	-38.333		29.4287	-36.827
29.4716	-39.36		29.4723	-38.869		29.4881	-38.959		29.5045	-38.332		29.4703	-36.827
29.5133	-39.364		29.5139	-38.873		29.5298	-38.964		29.5461	-38.33		29.512	-36.827
29.5549	-39.368		29.5623	-38.878		29.5715	-38.969		29.5878	-38.328		29.5537	-36.827
29.5966	-39.372		29.6039	-38.883		29.6131	-38.975		29.6295	-38.325		29.5953	-36.827
29.6383	-39.376		29.6456	-38.887		29.6548	-38.98		29.6711	-38.323		29.637	-36.828
29.6799	-39.38		29.6873	-38.892		29.6965	-38.986		29.7128	-38.321		29.6787	-36.828
29.7216	-39.384		29.7289	-38.897		29.7381	-38.992		29.7545	-38.319		29.7203	-36.828
29.7633	-39.389		29.7706	-38.901		29.7798	-38.998		29.7961	-38.318		29.762	-36.828
29.8049	-39.394		29.8122	-38.906		29.8215	-39.004		29.8378	-38.316		29.8037	-36.828
29.8466	-39.399		29.8539	-38.91		29.8631	-39.011		29.8795	-38.314		29.8453	-36.828
29.8883	-39.405		29.8956	-38.915		29.9048	-39.017		29.9211	-38.313		29.887	-36.828
29.9299	-39.41		29.9372	-38.919		29.9465	-39.024		29.9628	-38.312		29.9287	-36.828
29.9716	-39.415		29.9789	-38.923		29.9881	-39.031		30.0045	-38.311		29.9703	-36.829
30.0133	-39.421		30.0206	-38.927		30.0298	-39.038		30.0461	-38.309		30.012	-36.829
30.0549	-39.426		30.0622	-38.931		30.0715	-39.044		30.0878	-38.308		30.0537	-36.829
30.0966	-39.431		30.1039	-38.935		30.1131	-39.051		30.1295	-38.307		30.0953	-36.829
30.1383	-39.435		30.1456	-38.939		30.1548	-39.057		30.1711	-38.306		30.137	-36.829
30.1799	-39.44		30.1872	-38.943		30.1965	-39.063		30.2128	-38.305		30.1787	-36.829
30.2216	-39.444		30.2289	-38.947		30.2381	-39.068		30.2545	-38.304		30.2203	-36.829
30.2633	-39.448		30.2706	-38.952		30.2798	-39.073		30.2961	-38.303		30.262	-36.829
30.3049	-39.452		30.3122	-38.956		30.3215	-39.078		30.3378	-38.302		30.3037	-36.829
30.3466	-39.456		30.3539	-38.96		30.3631	-39.083		30.3795	-38.301		30.3453	-36.829
30.3883	-39.46		30.3956	-38.964		30.4048	-39.089		30.4211	-38.299		30.387	-36.829
30.4299	-39.464		30.4372	-38.969		30.4464	-39.094		30.4628	-38.298		30.4287	-36.829
30.4716	-39.468		30.4789	-38.974		30.4881	-39.099		30.5045	-38.297		30.4703	-36.829
30.5132	-39.471		30.5206	-38.979		30.5298	-39.105		30.5461	-38.296		30.512	-36.829
30.5549	-39.475		30.5622	-38.984		30.5714	-39.11		30.5878	-38.295		30.5537	-36.829
30.5966	-39.479		30.6039	-38.988		30.6131	-39.115		30.6295	-38.294		30.5953	-36.829
30.6383	-39.484		30.6456	-38.992		30.6548	-39.12		30.6711	-38.293		30.637	-36.829
30.6799	-39.488		30.6872	-38.996		30.6964	-39.126		30.7128	-38.291		30.6787	-36.829
30.7216	-39.492		30.7289	-39		30.7381	-39.131		30.7545	-38.29		30.7203	-36.829
30.7633	-39.497		30.7706	-39.003		30.7798	-39.137		30.7961	-38.289		30.762	-36.829
30.8049	-39.501		30.8122	-39.006		30.8214	-39.142		30.8378	-38.287		30.8037	-36.829
30.8466	-39.505		30.8539	-39.01		30.8631	-39.147		30.8795	-38.286		30.8453	-36.829
30.8882	-39.509		30.8956	-39.013		30.9048	-39.152		30.9211	-38.285		30.887	-36.829
30.9299	-39.513		30.9372	-39.015		30.9464	-39.157		30.9628	-38.283		30.9287	-36.829
30.9716	-39.516		30.9789	-39.019		30.9881	-39.162		31.0045	-38.282		30.9703	-36.829
31.0133	-39.519		31.0206	-39.022		31.0298	-39.166		31.0461	-38.281		31.012	-36.829
31.0616	-39.523		31.0622	-39.025		31.0714	-39.17		31.0878	-38.279		31.0537	-36.829
31.1033	-39.526		31.1039	-39.028		31.1131	-39.174		31.1295	-38.278		31.0953	-36.829
31.1449	-39.529		31.1456	-39.032		31.1548	-39.178		31.1711	-38.277		31.137	-36.828
31.1866	-39.532		31.1872	-39.035		31.1964	-39.181		31.2128	-38.276		31.1787	-36.828
31.2283	-39.535		31.2289	-39.038		31.2381	-39.185		31.2544	-38.274		31.2203	-36.828
31.2699	-39.537		31.2706	-39.042		31.2798	-39.189		31.2961	-38.273		31.262	-36.828
31.3116	-39.54		31.3122	-39.046		31.3214	-39.193		31.3378	-38.272		31.3037	-36.828
31.3532	-39.543		31.3539	-39.049		31.3631	-39.198		31.3794	-38.27		31.3453	-36.828
31.3949	-39.546		31.3956	-39.053		31.4048	-39.202		31.4211	-38.269		31.387	-36.828
31.4366	-39.549		31.4372	-39.056		31.4464	-39.207		31.4628	-38.267		31.4287	-36.828
31.4782	-39.553		31.4789	-39.06		31.4881	-39.211		31.5044	-38.266		31.4703	-36.828
31.5199	-39.556		31.5206	-39.063		31.5298	-39.216		31.5461	-38.264		31.512	-36.827
31.5616	-39.56		31.5622	-39.066		31.5714	-39.22		31.5878	-38.262		31.5537	-36.827
31.6032	-39.565		31.6039	-39.069		31.6131	-39.225		31.6294	-38.26		31.5953	-36.827
31.6449	-39.571		31.6456	-39.073		31.6548	-39.229		31.6711	-38.258		31.637	-36.827
31.6866	-39.577		31.6872	-39.076		31.6964	-39.233		31.7128	-38.257		31.6787	-36.827
31.7282	-39.582		31.7289	-39.079		31.7381	-39.237		31.7544	-38.255		31.7203	-36.826
31.7699	-39.587		31.7706	-39.082		31.7798	-39.241		31.7961	-38.253		31.762	-36.826
31.8116	-39.591		31.8122	-39.085		31.8214	-39.244		31.8378	-38.252		31.8037	-36.826
31.8532	-39.595		31.8539	-39.088		31.8631	-39.247		31.8794	-38.25		31.8453	-36.826
31.8949	-39.597		31.8956	-39.091		31.9131	-39.251		31.9211	-38.249		31.887	-36.825
31.9366	-39.6		31.9372	-39.095		31.9614	-39.255		31.9628	-38.247		31.9286	-36.825
31.9782	-39.602		31.9789	-39.098		32.0031	-39.258		32.0044	-38.245		31.9703	-36.825
32.0199	-39.604		32.0206	-39.101		32.0448	-39.261		32.0461	-38.243		32.012	-36.825
32.0616	-39.605		32.0622	-39.104		32.0864	-39.265		32.0878	-38.241		32.0536	-36.825
32.1032	-39.606		32.1039	-39.106		32.1281	-39.268		32.1294	-38.238		32.0953	-36.824
32.1449	-39.608		32.1456	-39.108		32.1698	-39.271		32.1711	-38.236		32.137	-36.824
32.1866	-39.609		32.1872	-39.11		32.2114	-39.275		32.2128	-38.234		32.1786	-36.823
32.2282	-39.61		32.2289	-39.112		32.2531	-39.278		32.2544	-38.232		32.2203	-36.823
32.2699	-39.611		32.2706	-39.114		32.2948	-39.281		32.2961	-38.23		32.262	-36.822
32.3116	-39.612		32.3122	-39.116		32.3364	-39.284		32.3461	-38.227		32.3036	-36.821
32.3532	-39.613		32.3539	-39.117		32.3781	-39.287		32.3878	-38.225		32.3453	-36.82
32.3949	-39.613		32.3956	-39.119		32.4198	-39.289		32.4294	-38.223		32.387	-36.819
32.4366	-39.614		32.4372	-39.12		32.4614	-39.292		32.4711	-38.221		32.4286	-36.818
32.4782	-39.614		32.4789	-39.121		32.5031	-39.294		32.5128	-38.219		32.4703	-36.817
32.5199	-39.614		32.5205	-39.122		32.5448	-39.296		32.5544	-38.216		32.512	-36.817
32.5616	-39.615		32.5622	-39.124		32.5864	-39.298		32.5961	-38.214		32.5536	-36.816
32.6032	-39.615		32.6039	-39.125		32.6281	-39.299		32.6378	-38.211		32.5953	-36.815
32.6449	-39.615		32.6456	-39.126		32.6698	-39.301		32.6794	-38.208		32.637	-36.814
32.6866	-39.615		32.6872	-39.126		32.7114	-39.302		32.7211	-38.205		32.6786	-36.813
32.7282	-39.616		32.7289	-39.127		32.7531	-39.304		32.7628	-38.202		32.7203	-36.812
32.7699	-39.616		32.7706	-39.128		32.7948	-39.305		32.8044	-38.199		32.762	-36.81
32.8116	-39.616		32.8122	-39.128		32.8364	-39.306		32.8461	-38.196		32.8036	-36.809
32.8532	-39.616		32.8539	-39.128		32.8781	-39.308		32.8878	-38.193		32.8453	-36.807
32.8949	-39.616		32.8955	-39.129		32.9198	-39.309		32.9294	-38.19		32.887	-36.806
32.9366	-39.616		32.9372	-39.129		32.9614	-39.31		32.9711	-38.187		32.9286	-36.804
32.9782	-39.617		32.9789	-39.129		33.0031	-39.311		33.0128	-38.184		32.9703	-36.802
33.0199	-39.617		33.0205	-39.129		33.0448	-39.312		33.0544	-38.181		33.012	-36.8
33.0616	-39.617		33.0622	-39.129		33.0864	-39.313		33.0961	-38.178		33.0536	-36.798
33.1032	-39.617		33.1039	-39.13		33.1281	-39.314		33.1378	-38.175		33.0953	-36.796
33.1449	-39.617		33.1455	-39.13		33.1698	-39.315		33.1794	-38.171		33.137	-36.794
33.1865	-39.617		33.1872	-39.13		33.2114	-39.316		33.2211	-38.167		33.1786	-36.792
33.2282	-39.617		33.2289	-39.13		33.2531	-39.316		33.2628	-38.164		33.2203	-36.79
33.2699	-39.617		33.2705	-39.13		33.2948	-39.317		33.3044	-38.16		33.262	-36.788
33.3116	-39.617		33.3122	-39.13		33.3364	-39.317		33.3461	-38.156		33.3036	-36.785
33.3532	-39.617		33.3539	-39.13		33.3781	-39.318		33.3878	-38.153		33.3453	-36.783
33.3949	-39.617		33.3955	-39.13		33.4197	-39.318		33.4294	-38.149		33.387	-36.78
33.4365	-39.616		33.4372	-39.13		33.4614	-39.318		33.4711	-38.145		33.4286	-36.777
33.4782	-39.616		33.4789	-39.13		33.5031	-39.319		33.5127	-38.142		33.4703	-36.774
33.5199	-39.616		33.5205	-39.13		33.5447	-39.319		33.5544	-38.139		33.512	-36.771
33.5615	-39.616		33.5622	-39.13		33.5864	-39.319		33.5961	-38.135		33.5536	-36.767
33.6032	-39.616		33.6039	-39.13		33.6281	-39.319		33.6377	-38.132		33.5953	-36.764
33.6449	-39.616		33.6455	-39.13		33.6697	-39.32		33.6794	-38.128		33.637	-36.761
33.6865	-39.615		33.6872	-39.13		33.7114	-39.32		33.7211	-38.124		33.6786	-36.759
33.7282	-39.615		33.7289	-39.13		33.7531	-39.32		33.7627	-38.12		33.7203	-36.756
33.7699	-39.614		33.7705	-39.13		33.7947	-39.32		33.8044	-38.115		33.7619	-36.754
33.8115	-39.613		33.8122	-39.129		33.8364	-39.32		33.8461	-38.111		33.8036	-36.751
33.8532	-39.611		33.8539	-39.129		33.8781	-39.32		33.8877	-38.107		33.8453	-36.748
33.8949	-39.61		33.8955	-39.128		33.9197	-39.32		33.9294	-38.102		33.887	-36.745
33.9365	-39.608		33.9372	-39.128		33.9614	-39.32		33.9711	-38.098		33.9286	-36.742
33.9782	-39.606		33.9789	-39.127		34.0031	-39.32		34.0127	-38.094		33.9703	-36.738
34.0199	-39.604		34.0205	-39.126		34.0447	-39.32		34.0544	-38.09		34.012	-36.734
34.0615	-39.602		34.0622	-39.125		34.0864	-39.32		34.0961	-38.086		34.0536	-36.73
34.1032	-39.6		34.1039	-39.123		34.1281	-39.32		34.1377	-38.081		34.0953	-36.726
34.1449	-39.597		34.1455	-39.121		34.1697	-39.32		34.1794	-38.076		34.1369	-36.722
34.1865	-39.594		34.1872	-39.118		34.2114	-39.32		34.2278	-38.07		34.1786	-36.718
34.2282	-39.589		34.2289	-39.114		34.2531	-39.32		34.2694	-38.065		34.2203	-36.714
34.2699	-39.584		34.2705	-39.11		34.2947	-39.32		34.3111	-38.059		34.2619	-36.71
34.3115	-39.578		34.3122	-39.105		34.3364	-39.32		34.3527	-38.053		34.3036	-36.706
34.3532	-39.572		34.3539	-39.1		34.3781	-39.32		34.3944	-38.048		34.3453	-36.702
34.3949	-39.565		34.3955	-39.094		34.4197	-39.319		34.4361	-38.042		34.3869	-36.697
34.4365	-39.558		34.4372	-39.088		34.4614	-39.319		34.4777	-38.036		34.4286	-36.692
34.4782	-39.55		34.4789	-39.081		34.5031	-39.318		34.5194	-38.03		34.4703	-36.687
34.5199	-39.542		34.5205	-39.073		34.5447	-39.317		34.5611	-38.024		34.5119	-36.682
34.5615	-39.534		34.5622	-39.064		34.5864	-39.316		34.6027	-38.018		34.5536	-36.677
34.6032	-39.524		34.6039	-39.054		34.6281	-39.315		34.6444	-38.012		34.5953	-36.672
34.6449	-39.514		34.6455	-39.044		34.6697	-39.313		34.6861	-38.006		34.637	-36.666
34.6865	-39.504		34.6872	-39.032		34.7114	-39.311		34.7277	-37.999		34.6786	-36.661
34.7282	-39.493		34.7289	-39.019		34.7531	-39.309		34.7694	-37.993		34.7203	-36.656
34.7699	-39.48		34.7705	-39.006		34.7947	-39.306		34.8111	-37.986		34.762	-36.651
34.8115	-39.467		34.8122	-38.994		34.8364	-39.302		34.8527	-37.979		34.8036	-36.646
34.8532	-39.455		34.8539	-38.981		34.8781	-39.298		34.8944	-37.972		34.8453	-36.641
34.8949	-39.442		34.8955	-38.969		34.9197	-39.293		34.9361	-37.965		34.887	-36.636
34.9365	-39.429		34.9372	-38.956		34.9614	-39.287		34.9777	-37.958		34.9286	-36.631
34.9782	-39.416		34.9789	-38.942		35.0031	-39.28		35.0194	-37.951		34.9703	-36.626
35.0199	-39.402		35.0205	-38.926		35.0447	-39.272		35.0611	-37.944		35.0119	-36.621
35.0615	-39.387		35.0622	-38.91		35.0864	-39.262		35.1027	-37.936		35.0536	-36.615
35.1032	-39.371		35.1039	-38.893		35.1281	-39.252		35.1444	-37.928		35.0953	-36.609
35.1449	-39.355		35.1455	-38.877		35.1697	-39.241		35.1861	-37.92		35.137	-36.604
35.1865	-39.336		35.1872	-38.861		35.2114	-39.23		35.2277	-37.911		35.1786	-36.598
35.2282	-39.318		35.2289	-38.846		35.2531	-39.219		35.2694	-37.902		35.2203	-36.592
35.2699	-39.3		35.2705	-38.83		35.2947	-39.207		35.3111	-37.893		35.262	-36.587
35.3115	-39.281		35.3122	-38.813		35.3364	-39.195		35.3527	-37.885		35.3036	-36.581
35.3532	-39.263		35.3539	-38.795		35.3781	-39.182		35.3944	-37.876		35.3453	-36.576
35.3949	-39.245		35.3955	-38.777		35.4197	-39.168		35.4361	-37.867		35.387	-36.57
35.4365	-39.227		35.4372	-38.758		35.4614	-39.152		35.4777	-37.86		35.4286	-36.564
35.4782	-39.208		35.4789	-38.738		35.5031	-39.135		35.5194	-37.852		35.4703	-36.558
35.5199	-39.188		35.5205	-38.717		35.5447	-39.119		35.5611	-37.843		35.5119	-36.553
35.5615	-39.169		35.5622	-38.697		35.5864	-39.103		35.6027	-37.836		35.5536	-36.546
35.6032	-39.15		35.6039	-38.678		35.6281	-39.086		35.6444	-37.827		35.5953	-36.54
35.6449	-39.13		35.6455	-38.659		35.6697	-39.07		35.6861	-37.818		35.6369	-36.534
35.6865	-39.11		35.6872	-38.638		35.7114	-39.052		35.7277	-37.808		35.6786	-36.527
35.7282	-39.091		35.7289	-38.616		35.7531	-39.034		35.7694	-37.798		35.7203	-36.521
35.7699	-39.07		35.7705	-38.594		35.7947	-39.015		35.8111	-37.788		35.7619	-36.515
35.8115	-39.047		35.8122	-38.572		35.8364	-38.995		35.8527	-37.777		35.8036	-36.509
35.8532	-39.024		35.8539	-38.549		35.8781	-38.973		35.8944	-37.766		35.8453	-36.503
35.8948	-39.001		35.8955	-38.526		35.9197	-38.953		35.9361	-37.756		35.8869	-36.497
35.9365	-38.978		35.9372	-38.503		35.9614	-38.932		35.9777	-37.745		35.9286	-36.49
35.9782	-38.956		35.9789	-38.479		36.0031	-38.912		36.0194	-37.733		35.9703	-36.484
36.0198	-38.933		36.0205	-38.455		36.0447	-38.892		36.0611	-37.722		36.0119	-36.477
36.0615	-38.908		36.0622	-38.43		36.0864	-38.87		36.1027	-37.71		36.0536	-36.47
36.1032	-38.882		36.1039	-38.403		36.1281	-38.847		36.1444	-37.697		36.0953	-36.462
36.1448	-38.855		36.1455	-38.378		36.1697	-38.823		36.1861	-37.684		36.1369	-36.455
36.1865	-38.829		36.1872	-38.352		36.2114	-38.8		36.2277	-37.671		36.1786	-36.448
36.2282	-38.801		36.2289	-38.326		36.2531	-38.776		36.2694	-37.658		36.2203	-36.442
36.2698	-38.774		36.2705	-38.301		36.2947	-38.752		36.3111	-37.646		36.2619	-36.435
36.3115	-38.747		36.3122	-38.276		36.3364	-38.728		36.3527	-37.633		36.3036	-36.429
36.3532	-38.719		36.3539	-38.248		36.3781	-38.703		36.3944	-37.621		36.3453	-36.423
36.3948	-38.689		36.3955	-38.22		36.4197	-38.677		36.4361	-37.609		36.3869	-36.417
36.4365	-38.658		36.4372	-38.191		36.4614	-38.649		36.4777	-37.595		36.4286	-36.41
36.4782	-38.627		36.4788	-38.164		36.5031	-38.62		36.5194	-37.582		36.4703	-36.403
36.5198	-38.596		36.5205	-38.136		36.5447	-38.593		36.5611	-37.568		36.5119	-36.396
36.5615	-38.565		36.5622	-38.108		36.5864	-38.566		36.6027	-37.554		36.5536	-36.388
36.6032	-38.535		36.6038	-38.078		36.628	-38.539		36.6444	-37.541		36.5953	-36.38
36.6448	-38.504		36.6455	-38.047		36.6697	-38.511		36.6861	-37.528		36.6369	-36.373
36.6865	-38.472		36.6872	-38.017		36.7114	-38.481		36.7277	-37.514		36.6786	-36.366
36.7282	-38.439		36.7288	-37.986		36.753	-38.449		36.7694	-37.501		36.7203	-36.359
36.7698	-38.406		36.7705	-37.955		36.7947	-38.418		36.8111	-37.487		36.7619	-36.352
36.8115	-38.372		36.8122	-37.924		36.8364	-38.388		36.8527	-37.474		36.8036	-36.346
36.8532	-38.338		36.8538	-37.894		36.878	-38.357		36.8944	-37.46		36.8453	-36.339
36.8948	-38.305		36.8955	-37.864		36.9197	-38.326		36.9361	-37.445		36.8869	-36.332
36.9365	-38.27		36.9372	-37.832		36.9614	-38.293		36.9777	-37.431		36.9286	-36.326
36.9782	-38.233		36.9788	-37.8		37.003	-38.26		37.0194	-37.416		36.9703	-36.319
37.0198	-38.196		37.0205	-37.768		37.0447	-38.226		37.0611	-37.401		37.0119	-36.312
37.0615	-38.161		37.0622	-37.735		37.0864	-38.192		37.1027	-37.387		37.0536	-36.306
37.1032	-38.125		37.1038	-37.703		37.128	-38.159		37.1444	-37.372		37.0953	-36.299
37.1448	-38.09		37.1455	-37.671		37.1697	-38.126		37.186	-37.358		37.1369	-36.293
37.1865	-38.054		37.1872	-37.637		37.2114	-38.092		37.2277	-37.343		37.1786	-36.286
37.2282	-38.014		37.2288	-37.602		37.253	-38.055		37.2694	-37.328		37.2203	-36.28
37.2698	-37.975		37.2705	-37.567		37.2947	-38.019		37.311	-37.314		37.2619	-36.274
37.3115	-37.935		37.3122	-37.532		37.3364	-37.983		37.3527	-37.299		37.3036	-36.268
37.3532	-37.897		37.3538	-37.498		37.378	-37.947		37.3944	-37.283		37.3453	-36.262
37.3948	-37.859		37.3955	-37.463		37.4197	-37.912		37.436	-37.266		37.3869	-36.256
37.4365	-37.818		37.4372	-37.428		37.4614	-37.873		37.4777	-37.251		37.4286	-36.25
37.4782	-37.775		37.4789	-37.391		37.503	-37.834		37.5194	-37.236		37.4703	-36.243
37.5198	-37.732		37.5205	-37.355		37.5447	-37.794		37.561	-37.221		37.5119	-36.236
37.5615	-37.691		37.5622	-37.319		37.5864	-37.754		37.6027	-37.206		37.5536	-36.229
37.6032	-37.65		37.6038	-37.285		37.628	-37.715		37.6444	-37.19		37.5953	-36.221
37.6448	-37.609		37.6455	-37.25		37.6697	-37.677		37.686	-37.175		37.6369	-36.214
37.6865	-37.565		37.6872	-37.212		37.7114	-37.638		37.7277	-37.159		37.6786	-36.207
37.7282	-37.52		37.7288	-37.173		37.753	-37.596		37.7694	-37.142		37.7203	-36.201
37.7698	-37.475		37.7705	-37.134		37.7947	-37.553		37.811	-37.125		37.7619	-36.195
37.8115	-37.432		37.8122	-37.096		37.8364	-37.51		37.8527	-37.109		37.8036	-36.188
37.8532	-37.387		37.8538	-37.058		37.878	-37.469		37.8944	-37.092		37.8453	-36.182
37.8948	-37.341		37.8955	-37.02		37.9197	-37.427		37.936	-37.076		37.8869	-36.176
37.9365	-37.295		37.9372	-36.981		37.9614	-37.382		37.9777	-37.061		37.9286	-36.17
37.9782	-37.252		37.9788	-36.941		38.003	-37.336		38.0194	-37.045		37.9703	-36.164
38.0198	-37.21		38.0205	-36.901		38.0447	-37.29		38.061	-37.029		38.0119	-36.157
38.0615	-37.167		38.0622	-36.862		38.0864	-37.245		38.1027	-37.013		38.0536	-36.15
38.1032	-37.119		38.1038	-36.823		38.128	-37.199		38.1444	-36.997		38.0953	-36.143
38.1448	-37.07		38.1455	-36.784		38.1697	-37.151		38.186	-36.981		38.1369	-36.137
38.1865	-37.02		38.1872	-36.743		38.2114	-37.103		38.2277	-36.964		38.1786	-36.13
38.2282	-36.972		38.2288	-36.7		38.253	-37.056		38.2694	-36.949		38.2203	-36.124
38.2698	-36.924		38.2705	-36.659		38.2947	-37.009		38.311	-36.934		38.2619	-36.118
38.3115	-36.875		38.3122	-36.62		38.3364	-36.962		38.3527	-36.92		38.3036	-36.113
38.3532	-36.825		38.3538	-36.58		38.378	-36.915		38.3944	-36.905		38.3453	-36.107
38.3948	-36.778		38.3955	-36.54		38.4197	-36.864		38.436	-36.89		38.3869	-36.102
38.4365	-36.73		38.4372	-36.498		38.4614	-36.814		38.4777	-36.874		38.4286	-36.095
38.4781	-36.682		38.4788	-36.456		38.503	-36.765		38.5194	-36.857		38.4702	-36.089
38.5198	-36.633		38.5205	-36.414		38.5447	-36.716		38.561	-36.84		38.5119	-36.082
38.5615	-36.583		38.5621	-36.373		38.5864	-36.666		38.6027	-36.824		38.5536	-36.076
38.6031	-36.533		38.6038	-36.332		38.628	-36.614		38.6444	-36.808		38.5952	-36.07
38.6448	-36.485		38.6455	-36.291		38.6697	-36.56		38.686	-36.792		38.6369	-36.064
38.6865	-36.436		38.6872	-36.248		38.7114	-36.509		38.7277	-36.777		38.6786	-36.058
38.7281	-36.388		38.7288	-36.205		38.753	-36.456		38.7694	-36.762		38.7202	-36.052
38.7698	-36.338		38.7705	-36.163		38.7947	-36.402		38.811	-36.747		38.7619	-36.047
38.8115	-36.286		38.8122	-36.122		38.8364	-36.348		38.8527	-36.732		38.8036	-36.042
38.8531	-36.238		38.8538	-36.08		38.878	-36.292		38.8943	-36.716		38.8452	-36.037
38.8948	-36.193		38.8955	-36.039		38.9197	-36.237		38.936	-36.701		38.8869	-36.032
38.9365	-36.146		38.9372	-35.997		38.9614	-36.183		38.9777	-36.685		38.9286	-36.027
38.9781	-36.097		38.9788	-35.958		39.003	-36.127		39.0193	-36.671		38.9702	-36.022
39.0198	-36.048		39.0205	-35.918		39.0447	-36.07		39.061	-36.656		39.0119	-36.017
39.0615	-36.001		39.0622	-35.878		39.0864	-36.014		39.1027	-36.643		39.0536	-36.012
39.1031	-35.953		39.1038	-35.838		39.128	-35.96		39.1443	-36.629		39.0952	-36.007
39.1531	-35.896		39.1538	-35.789		39.1697	-35.904		39.186	-36.616		39.1369	-36.002
39.1948	-35.848		39.1955	-35.749		39.2114	-35.847		39.2277	-36.602		39.1869	-35.997
39.2365	-35.799		39.2372	-35.709		39.253	-35.79		39.2694	-36.589		39.2286	-35.992
39.2781	-35.752		39.2788	-35.671		39.2947	-35.733		39.311	-36.574		39.2702	-35.988
39.3198	-35.707		39.3205	-35.633		39.3364	-35.676		39.3527	-36.56		39.3119	-35.983
39.3615	-35.663		39.3621	-35.594		39.378	-35.619		39.3943	-36.547		39.3602	-35.979
39.4031	-35.618		39.4038	-35.556		39.4197	-35.56		39.436	-36.533		39.4036	-35.974
39.4448	-35.573		39.4455	-35.519		39.4614	-35.503		39.4777	-36.52		39.4519	-35.969
39.4865	-35.528		39.4871	-35.483		39.503	-35.447		39.5193	-36.508		39.4936	-35.964
39.5281	-35.485		39.5288	-35.449		39.5447	-35.391		39.561	-36.496		39.5352	-35.96
39.5698	-35.442		39.5705	-35.415		39.5863	-35.331		39.6027	-36.484		39.5769	-35.955
39.6115	-35.4		39.6121	-35.382		39.628	-35.274		39.6444	-36.472		39.6186	-35.951
39.6531	-35.358		39.6538	-35.348		39.6697	-35.218		39.686	-36.46		39.6602	-35.947
39.6948	-35.317		39.6955	-35.315		39.7114	-35.162		39.7277	-36.448		39.7019	-35.943
39.7365	-35.279		39.7372	-35.282		39.753	-35.106		39.7693	-36.437		39.7436	-35.939
39.7781	-35.244		39.7788	-35.252		39.7947	-35.05		39.811	-36.425		39.7852	-35.935
39.8198	-35.209		39.8205	-35.225		39.8364	-34.996		39.8527	-36.413		39.8269	-35.932
39.8615	-35.176		39.8622	-35.198		39.878	-34.944		39.8943	-36.401		39.8686	-35.928
39.9031	-35.142		39.9038	-35.171		39.9197	-34.892		39.936	-36.389		39.9102	-35.925
39.9448	-35.109		39.9455	-35.146		39.9614	-34.839		39.9777	-36.378		39.9519	-35.922
39.9865	-35.077		39.9871	-35.121		40.003	-34.787		40.0193	-36.367		39.9935	-35.918
40.0281	-35.049		40.0288	-35.097		40.0447	-34.737		40.061	-36.356		40.0352	-35.915
40.0698	-35.024		40.0705	-35.075		40.0864	-34.69		40.1027	-36.345		40.0769	-35.911
40.1115	-35		40.1121	-35.054		40.128	-34.643		40.1443	-36.334		40.1185	-35.908
40.1531	-34.978		40.1538	-35.036		40.1697	-34.597		40.186	-36.323		40.1602	-35.904
40.1948	-34.956		40.1955	-35.018		40.2114	-34.552		40.2277	-36.311		40.2019	-35.901
40.2365	-34.936		40.2371	-35.001		40.253	-34.509		40.2693	-36.3		40.2435	-35.898
40.2781	-34.915		40.2788	-34.984		40.2947	-34.468		40.311	-36.291		40.2852	-35.896
40.3198	-34.897		40.3205	-34.968		40.3364	-34.429		40.3527	-36.281		40.3269	-35.893
40.3614	-34.881		40.3621	-34.953		40.378	-34.39		40.3943	-36.273		40.3685	-35.89
40.4031	-34.867		40.4038	-34.939		40.4197	-34.354		40.436	-36.264		40.4102	-35.888
40.4448	-34.855		40.4455	-34.927		40.4613	-34.319		40.4777	-36.255		40.4519	-35.886
40.4864	-34.846		40.4871	-34.916		40.503	-34.286		40.5193	-36.246		40.4935	-35.884
40.5281	-34.838		40.5288	-34.906		40.5447	-34.254		40.561	-36.237		40.5352	-35.881
40.5698	-34.831		40.5705	-34.898		40.5864	-34.226		40.6027	-36.228		40.5769	-35.879
40.6114	-34.825		40.6121	-34.891		40.628	-34.201		40.6443	-36.219		40.6185	-35.877
40.6531	-34.821		40.6538	-34.886		40.6697	-34.178		40.686	-36.21		40.6602	-35.875
40.6948	-34.818		40.6955	-34.881		40.7113	-34.157		40.7277	-36.202		40.7019	-35.872
40.7364	-34.815		40.7371	-34.877		40.753	-34.138		40.7693	-36.194		40.7435	-35.87
40.7781	-34.813		40.7788	-34.874		40.7947	-34.12		40.811	-36.186		40.7852	-35.868
40.8198	-34.812		40.8205	-34.871		40.8363	-34.104		40.8526	-36.179		40.8269	-35.867
40.8614	-34.812		40.8621	-34.869		40.878	-34.09		40.8943	-36.172		40.8685	-35.865
40.9031	-34.812		40.9038	-34.867		40.9197	-34.08		40.936	-36.165		40.9102	-35.864
40.9448	-34.812		40.9455	-34.867		40.9613	-34.071		40.9776	-36.157		40.9519	-35.863
40.9864	-34.812		40.9871	-34.866		41.003	-34.064		41.0193	-36.149		40.9935	-35.862
41.0281	-34.812		41.0288	-34.866		41.0447	-34.059		41.061	-36.141		41.0352	-35.861
41.0698	-34.812		41.0705	-34.866		41.0863	-34.055		41.1026	-36.134		41.0769	-35.86
41.1114	-34.813		41.1121	-34.866		41.128	-34.053		41.1443	-36.127		41.1185	-35.859
41.1531	-34.814		41.1538	-34.866		41.1697	-34.051		41.186	-36.121		41.1602	-35.858
41.1948	-34.816		41.1955	-34.867		41.2113	-34.05		41.2276	-36.115		41.2019	-35.857
41.2364	-34.82		41.2371	-34.867		41.253	-34.05		41.2693	-36.109		41.2435	-35.857
41.2781	-34.827		41.2788	-34.867		41.2946	-34.05		41.311	-36.104		41.2852	-35.856
41.3198	-34.839		41.3205	-34.869		41.3363	-34.05		41.3526	-36.099		41.3269	-35.855
41.3614	-34.856		41.3621	-34.871		41.378	-34.05		41.3943	-36.095		41.3685	-35.855
41.4031	-34.878		41.4038	-34.876		41.4196	-34.05		41.436	-36.09		41.4102	-35.854
41.4448	-34.907		41.4455	-34.883		41.4613	-34.05		41.4776	-36.086		41.4519	-35.854
41.4864	-34.941		41.4871	-34.894		41.503	-34.051		41.5193	-36.081		41.4935	-35.853
41.5281	-34.979		41.5288	-34.909		41.5447	-34.052		41.561	-36.076		41.5352	-35.853
41.5698	-35.023		41.5705	-34.929		41.5863	-34.055		41.6026	-36.072		41.5769	-35.853
41.6114	-35.07		41.6121	-34.953		41.628	-34.061		41.6443	-36.067		41.6185	-35.853
41.6531	-35.12		41.6538	-34.983		41.6697	-34.072		41.686	-36.064		41.6602	-35.852
41.6948	-35.173		41.6955	-35.019		41.7113	-34.088		41.7276	-36.06		41.7019	-35.852
41.7364	-35.229		41.7371	-35.058		41.753	-34.11		41.7693	-36.057		41.7435	-35.852
41.7781	-35.283		41.7788	-35.102		41.7947	-34.141		41.811	-36.054		41.7852	-35.852
41.8198	-35.338		41.8205	-35.15		41.8363	-34.176		41.8526	-36.052		41.8269	-35.852
41.8614	-35.396		41.8621	-35.2		41.878	-34.218		41.8943	-36.049		41.8685	-35.851
41.9031	-35.454		41.9038	-35.253		41.9196	-34.264		41.936	-36.047		41.9102	-35.851
41.9448	-35.514		41.9455	-35.306		41.9613	-34.315		41.9776	-36.045		41.9519	-35.851
41.9864	-35.578		41.9871	-35.36		42.003	-34.371		42.0193	-36.043		41.9935	-35.851
42.0281	-35.642		42.0288	-35.416		42.0446	-34.428		42.061	-36.041		42.0352	-35.851
42.0698	-35.707		42.0705	-35.472		42.0863	-34.489		42.1026	-36.04		42.0769	-35.851
42.1114	-35.771		42.1121	-35.526		42.128	-34.551		42.1443	-36.039		42.1185	-35.851
42.1531	-35.835		42.1538	-35.583		42.1696	-34.617		42.186	-36.037		42.1602	-35.851
42.1948	-35.9		42.1955	-35.641		42.2113	-34.684		42.2276	-36.036		42.2019	-35.851
42.2364	-35.964		42.2371	-35.7		42.253	-34.749		42.2693	-36.036		42.2435	-35.851
42.2781	-36.03		42.2855	-35.77		42.2946	-34.816		42.3109	-36.035		42.2852	-35.851
42.3198	-36.098		42.3271	-35.833		42.3363	-34.88		42.3526	-36.035		42.3269	-35.851
42.3681	-36.177		42.3688	-35.896		42.378	-34.945		42.3943	-36.035		42.3685	-35.851
42.4098	-36.249		42.4105	-35.958		42.4196	-35.014		42.4359	-36.034		42.4102	-35.851
42.4514	-36.321		42.4521	-36.019		42.4613	-35.083		42.4776	-36.034		42.4519	-35.852
42.4931	-36.391		42.4938	-36.08		42.503	-35.155		42.5193	-36.034		42.4935	-35.852
42.5348	-36.461		42.5355	-36.139		42.5446	-35.228		42.5609	-36.034		42.5352	-35.852
42.5764	-36.529		42.5771	-36.2		42.5863	-35.299		42.6026	-36.034		42.5769	-35.852
42.6181	-36.597		42.6188	-36.263		42.628	-35.37		42.6443	-36.034		42.6185	-35.852
42.6598	-36.664		42.6605	-36.324		42.6696	-35.439		42.686	-36.034		42.6602	-35.853
42.7014	-36.733		42.7021	-36.388		42.7113	-35.511		42.7276	-36.035		42.7019	-35.853
42.7431	-36.802		42.7438	-36.453		42.753	-35.586		42.7693	-36.035		42.7435	-35.854
42.7848	-36.87		42.7854	-36.517		42.7946	-35.661		42.811	-36.035		42.7852	-35.855
42.8264	-36.935		42.8271	-36.581		42.8363	-35.738		42.8526	-36.036		42.8269	-35.856
42.8681	-36.999		42.8688	-36.642		42.878	-35.818		42.8943	-36.037		42.8685	-35.858
42.9098	-37.063		42.9104	-36.702		42.9196	-35.896		42.9359	-36.038		42.9102	-35.859
42.9514	-37.124		42.9521	-36.76		42.9613	-35.976		42.9776	-36.041		42.9519	-35.861
42.9931	-37.184		42.9938	-36.819		43.003	-36.053		43.0193	-36.045		42.9935	-35.863
43.0348	-37.242		43.0354	-36.874		43.0446	-36.131		43.0609	-36.05		43.0352	-35.866
43.0764	-37.301		43.0771	-36.927		43.093	-36.224		43.1026	-36.057		43.0768	-35.868
43.1181	-37.359		43.1188	-36.98		43.1346	-36.304		43.1443	-36.065		43.1185	-35.871
43.1598	-37.415		43.1604	-37.033		43.1763	-36.381		43.1859	-36.075		43.1602	-35.874
43.2014	-37.47		43.2021	-37.085		43.218	-36.46		43.2276	-36.088		43.2018	-35.877
43.2431	-37.525		43.2438	-37.136		43.2596	-36.536		43.2693	-36.103		43.2435	-35.881
43.2847	-37.581		43.2854	-37.186		43.3013	-36.61		43.3109	-36.12		43.2852	-35.885
43.3264	-37.634		43.3271	-37.236		43.343	-36.685		43.3526	-36.138		43.3268	-35.89
43.3681	-37.685		43.3688	-37.285		43.3846	-36.759		43.3943	-36.157		43.3685	-35.895
43.4098	-37.733		43.4104	-37.332		43.4263	-36.833		43.4359	-36.178		43.4102	-35.9
43.4514	-37.779		43.4521	-37.378		43.468	-36.908		43.4776	-36.2		43.4518	-35.905
43.4931	-37.825		43.4938	-37.421		43.5096	-36.982		43.5193	-36.223		43.4935	-35.911
43.5348	-37.869		43.5354	-37.463		43.5513	-37.05		43.5609	-36.246		43.5352	-35.917
43.5764	-37.911		43.5771	-37.504		43.593	-37.117		43.6026	-36.271		43.5769	-35.923
43.6181	-37.954		43.6188	-37.544		43.6346	-37.182		43.6443	-36.296		43.6185	-35.93
43.6598	-37.995		43.6604	-37.582		43.6763	-37.244		43.6859	-36.32		43.6602	-35.936
43.7014	-38.035		43.7021	-37.619		43.718	-37.303		43.7276	-36.345		43.7018	-35.942
43.7431	-38.071		43.7438	-37.656		43.7596	-37.361		43.7693	-36.371		43.7435	-35.948
43.7848	-38.106		43.7854	-37.69		43.8013	-37.417		43.8109	-36.397		43.7852	-35.955
43.8264	-38.14		43.8271	-37.723		43.843	-37.474		43.8526	-36.422		43.8268	-35.961
43.8681	-38.172		43.8688	-37.755		43.8846	-37.529		43.8943	-36.446		43.8685	-35.967
43.9098	-38.204		43.9104	-37.786		43.9263	-37.581		43.9359	-36.469		43.9102	-35.973
43.9514	-38.235		43.9521	-37.816		43.968	-37.632		43.9776	-36.492		43.9518	-35.979
43.9931	-38.266		43.9938	-37.845		44.0096	-37.679		44.0193	-36.516		43.9935	-35.984
44.0347	-38.296		44.0354	-37.873		44.0513	-37.725		44.0609	-36.539		44.0352	-35.99
44.0764	-38.325		44.0771	-37.901		44.093	-37.768		44.1026	-36.562		44.0768	-35.996
44.1181	-38.353		44.1188	-37.927		44.1346	-37.809		44.1443	-36.584		44.1185	-36.001
44.1597	-38.379		44.1604	-37.953		44.1763	-37.847		44.1859	-36.606		44.1602	-36.007
44.2014	-38.405		44.2021	-37.978		44.218	-37.883		44.2276	-36.626		44.2018	-36.013
44.2431	-38.431		44.2438	-38.004		44.2596	-37.916		44.2693	-36.647		44.2435	-36.018
44.2848	-38.456		44.2854	-38.029		44.3013	-37.949		44.3109	-36.667		44.2852	-36.024
44.3264	-38.48		44.3271	-38.053		44.343	-37.98		44.3526	-36.687		44.3268	-36.03
44.3681	-38.503		44.3688	-38.077		44.3846	-38.008		44.3943	-36.706		44.3685	-36.035
44.4097	-38.526		44.4104	-38.101		44.4263	-38.036		44.4359	-36.725		44.4102	-36.04
44.4514	-38.548		44.4521	-38.123		44.468	-38.062		44.4776	-36.744		44.4518	-36.045
44.4931	-38.57		44.4938	-38.144		44.5096	-38.086		44.5193	-36.761		44.4935	-36.049
44.5347	-38.591		44.5354	-38.165		44.5513	-38.109		44.5609	-36.778		44.5352	-36.054
44.5764	-38.612		44.5771	-38.185		44.593	-38.133		44.6026	-36.795		44.5768	-36.058
44.6181	-38.633		44.6188	-38.205		44.6346	-38.155		44.6443	-36.811		44.6185	-36.062
44.6597	-38.653		44.6604	-38.224		44.6763	-38.176		44.6859	-36.826		44.6602	-36.066
44.7014	-38.672		44.7021	-38.242		44.718	-38.196		44.7276	-36.841		44.7018	-36.07
44.7431	-38.691		44.7438	-38.26		44.7596	-38.215		44.7693	-36.856		44.7435	-36.074
44.7847	-38.71		44.7854	-38.278		44.8013	-38.233		44.8109	-36.87		44.7852	-36.077
44.8264	-38.727		44.8271	-38.295		44.843	-38.25		44.8526	-36.885		44.8268	-36.081
44.8681	-38.746		44.8688	-38.312		44.8846	-38.266		44.8943	-36.899		44.8685	-36.085
44.9097	-38.763		44.9104	-38.329		44.9263	-38.281		44.9359	-36.912		44.9102	-36.088
44.9514	-38.78		44.9521	-38.345		44.968	-38.295		44.9776	-36.925		44.9518	-36.092
44.9931	-38.796		44.9938	-38.361		45.0096	-38.309		45.0193	-36.939		44.9935	-36.095
45.0347	-38.813		45.0354	-38.377		45.0513	-38.32		45.0609	-36.952		45.0352	-36.099
45.0764	-38.83		45.0771	-38.392		45.0929	-38.331		45.1026	-36.965		45.0768	-36.102
45.1181	-38.845		45.1188	-38.407		45.1346	-38.342		45.1443	-36.977		45.1185	-36.105
45.1597	-38.86		45.1604	-38.421		45.1763	-38.351		45.1859	-36.99		45.1602	-36.108
45.2014	-38.875		45.2021	-38.435		45.2179	-38.36		45.2276	-37.002		45.2018	-36.111
45.2431	-38.89		45.2437	-38.448		45.2596	-38.368		45.2693	-37.013		45.2435	-36.114
45.2847	-38.904		45.2854	-38.46		45.3013	-38.375		45.3109	-37.023		45.2852	-36.116
45.3264	-38.918		45.3271	-38.472		45.3429	-38.382		45.3526	-37.034		45.3268	-36.119
45.3681	-38.93		45.3687	-38.483		45.3846	-38.389		45.3943	-37.043		45.3685	-36.121
45.4097	-38.942		45.4104	-38.493		45.4263	-38.395		45.4426	-37.054		45.4102	-36.123
45.4514	-38.953		45.4521	-38.502		45.4679	-38.402		45.4843	-37.063		45.4518	-36.126
45.4931	-38.964		45.4937	-38.511		45.5096	-38.408		45.5259	-37.071		45.4935	-36.128
45.5347	-38.974		45.5354	-38.519		45.5513	-38.414		45.5676	-37.079		45.5352	-36.131
45.5764	-38.984		45.5771	-38.528		45.5929	-38.42		45.6093	-37.086		45.5768	-36.133
45.6181	-38.993		45.6187	-38.536		45.6346	-38.425		45.6509	-37.093		45.6185	-36.136
45.6597	-39.001		45.6604	-38.544		45.6763	-38.43		45.6926	-37.099		45.6601	-36.139
45.7014	-39.009		45.7021	-38.553		45.7179	-38.436		45.7343	-37.106		45.7018	-36.142
45.7431	-39.016		45.7437	-38.562		45.7596	-38.441		45.7759	-37.112		45.7435	-36.144
45.7847	-39.024		45.7854	-38.57		45.8013	-38.445		45.8176	-37.117		45.7851	-36.146
45.8264	-39.032		45.8271	-38.578		45.8429	-38.449		45.8593	-37.123		45.8268	-36.148
45.8681	-39.039		45.8688	-38.586		45.8846	-38.453		45.9009	-37.129		45.8685	-36.15
45.9097	-39.046		45.9104	-38.595		45.9263	-38.456		45.9426	-37.134		45.9101	-36.152
45.9514	-39.054		45.9521	-38.603		45.9679	-38.459		45.9843	-37.14		45.9518	-36.153
45.9931	-39.061		45.9937	-38.611		46.0096	-38.462		46.0259	-37.144		45.9935	-36.154
46.0347	-39.069		46.0354	-38.619		46.0513	-38.464		46.0676	-37.149		46.0351	-36.155
46.0764	-39.076		46.0771	-38.626		46.0929	-38.466		46.1093	-37.154		46.0768	-36.157
46.1181	-39.084		46.1187	-38.633		46.1346	-38.467		46.1509	-37.158		46.1185	-36.158
46.1597	-39.091		46.1604	-38.639		46.1763	-38.469		46.1926	-37.162		46.1601	-36.159
46.2014	-39.098		46.2021	-38.645		46.2179	-38.47		46.2342	-37.166		46.2018	-36.16
46.2431	-39.105		46.2437	-38.651		46.2596	-38.472		46.2759	-37.17		46.2435	-36.161
46.2847	-39.111		46.2854	-38.655		46.3013	-38.473		46.3176	-37.173		46.2851	-36.163
46.3264	-39.116		46.3271	-38.659		46.3429	-38.475		46.3592	-37.176		46.3268	-36.164
46.3681	-39.122		46.3687	-38.663		46.3846	-38.476		46.4009	-37.179		46.3685	-36.165
46.4097	-39.127		46.4104	-38.667		46.4263	-38.477		46.4426	-37.181		46.4101	-36.166
46.4514	-39.131		46.4521	-38.671		46.4679	-38.478		46.4842	-37.184		46.4518	-36.167
46.493	-39.135		46.4937	-38.675		46.5096	-38.479		46.5259	-37.186		46.4935	-36.169
46.5347	-39.139		46.5354	-38.678		46.5513	-38.479		46.5676	-37.188		46.5351	-36.17
46.5764	-39.142		46.5771	-38.682		46.5929	-38.479		46.6092	-37.19		46.5768	-36.17
46.618	-39.146		46.6187	-38.685		46.6346	-38.48		46.6509	-37.192		46.6185	-36.171
46.6597	-39.15		46.6604	-38.689		46.6763	-38.48		46.6926	-37.194		46.6601	-36.172
46.7014	-39.153		46.7021	-38.692		46.7179	-38.48		46.7342	-37.196		46.7018	-36.173
46.743	-39.157		46.7437	-38.696		46.7596	-38.481		46.7759	-37.198		46.7435	-36.174
46.7847	-39.161		46.7854	-38.699		46.8013	-38.481		46.8176	-37.2		46.7851	-36.174
46.8264	-39.165		46.8271	-38.702		46.8429	-38.481		46.8592	-37.201		46.8268	-36.175
46.868	-39.168		46.8687	-38.705		46.8846	-38.481		46.9009	-37.202		46.8685	-36.176
46.9097	-39.172		46.9104	-38.707		46.9263	-38.481		46.9426	-37.203		46.9101	-36.176
46.9514	-39.174		46.9521	-38.709		46.9679	-38.482		46.9842	-37.204		46.9518	-36.177
46.993	-39.178		46.9937	-38.711		47.0096	-38.482		47.0259	-37.205		46.9935	-36.178
47.0347	-39.186		47.0354	-38.713		47.0513	-38.482		47.0676	-37.206		47.0351	-36.178
47.0764	-39.2		47.0771	-38.714		47.0929	-38.482		47.1092	-37.207		47.0768	-36.178
47.118	-39.213		47.1187	-38.716		47.1346	-38.482		47.1509	-37.207		47.1185	-36.179
47.1597	-39.224		47.1604	-38.717		47.1763	-38.482		47.1926	-37.208		47.1601	-36.179
47.2014	-39.233		47.2021	-38.719		47.2179	-38.482		47.2342	-37.209		47.2018	-36.179
47.243	-39.24		47.2437	-38.72		47.2596	-38.482		47.2759	-37.209		47.2435	-36.179
47.2847	-39.246		47.2854	-38.721		47.3013	-38.482		47.3176	-37.21		47.2851	-36.18
47.3264	-39.25		47.3271	-38.722		47.3429	-38.482		47.3592	-37.21		47.3268	-36.18
47.368	-39.253		47.3687	-38.724		47.3846	-38.482		47.4009	-37.21		47.3685	-36.18
47.4097	-39.256		47.4104	-38.724		47.4263	-38.482		47.4426	-37.211		47.4101	-36.18
47.4514	-39.258		47.4521	-38.725		47.4679	-38.482		47.4842	-37.211		47.4518	-36.181
47.493	-39.26		47.4937	-38.726		47.5096	-38.481		47.5259	-37.211		47.4935	-36.181
47.5347	-39.261		47.5354	-38.726		47.5512	-38.481		47.5676	-37.211		47.5351	-36.181
47.5764	-39.262		47.5771	-38.726		47.5929	-38.481		47.6092	-37.211		47.5768	-36.181
47.618	-39.263		47.6187	-38.727		47.6346	-38.481		47.6509	-37.212		47.6185	-36.181
47.6597	-39.264		47.6604	-38.727		47.6762	-38.48		47.6926	-37.212		47.6601	-36.182
47.7014	-39.265		47.702	-38.727		47.7179	-38.48		47.7342	-37.212		47.7018	-36.182
47.743	-39.265		47.7437	-38.727		47.7596	-38.479		47.7759	-37.212		47.7435	-36.182
47.7847	-39.265		47.7854	-38.727		47.8012	-38.478		47.8176	-37.212		47.7851	-36.182
47.8264	-39.266		47.827	-38.727		47.8429	-38.477		47.8592	-37.212		47.8268	-36.182
47.868	-39.266		47.8687	-38.728		47.8846	-38.476		47.9009	-37.212		47.8685	-36.182
47.9097	-39.266		47.9104	-38.728		47.9262	-38.474		47.9426	-37.212		47.9101	-36.182
47.9514	-39.266		47.952	-38.728		47.9679	-38.472		47.9842	-37.212		47.9518	-36.182
47.993	-39.266		47.9937	-38.728		48.0096	-38.47		48.0259	-37.212		47.9935	-36.182
48.0347	-39.266		48.0354	-38.728		48.0512	-38.467		48.0676	-37.211		48.0351	-36.182
48.0764	-39.266		48.0771	-38.728		48.0929	-38.465		48.1092	-37.211		48.0768	-36.183
48.118	-39.266		48.1187	-38.728		48.1346	-38.462		48.1509	-37.211		48.1185	-36.183
48.1597	-39.266		48.1604	-38.728		48.1763	-38.458		48.1926	-37.211		48.1601	-36.183
48.2014	-39.266		48.202	-38.728		48.2179	-38.454		48.2342	-37.211		48.2018	-36.183
48.243	-39.266		48.2437	-38.728		48.2596	-38.449		48.2759	-37.211		48.2435	-36.183
48.2847	-39.266		48.2854	-38.728		48.3013	-38.443		48.3176	-37.21		48.2851	-36.183
48.3263	-39.266		48.327	-38.728		48.3429	-38.437		48.3592	-37.21		48.3268	-36.183
48.368	-39.266		48.3687	-38.728		48.3846	-38.43		48.4009	-37.21		48.3684	-36.183
48.4097	-39.266		48.4104	-38.728		48.4262	-38.423		48.4426	-37.209		48.4101	-36.182
48.4514	-39.265		48.452	-38.727		48.4679	-38.415		48.4842	-37.208		48.4518	-36.182
48.493	-39.265		48.4937	-38.727		48.5096	-38.408		48.5259	-37.207		48.4934	-36.182
48.5347	-39.264		48.5354	-38.727		48.5512	-38.4		48.5676	-37.206		48.5351	-36.182
48.5764	-39.263		48.577	-38.727		48.5929	-38.392		48.6092	-37.205		48.5768	-36.182
48.618	-39.262		48.6187	-38.726		48.6346	-38.384		48.6509	-37.203		48.6184	-36.182
48.6597	-39.261		48.6604	-38.725		48.6762	-38.376		48.6926	-37.201		48.6601	-36.182
48.7014	-39.259		48.702	-38.724		48.7179	-38.366		48.7342	-37.198		48.7018	-36.182
48.743	-39.258		48.7437	-38.723		48.7596	-38.357		48.7759	-37.195		48.7435	-36.182
48.7847	-39.255		48.7854	-38.721		48.8012	-38.348		48.8176	-37.191		48.7851	-36.182
48.8264	-39.253		48.827	-38.719		48.8429	-38.337		48.8592	-37.188		48.8268	-36.181
48.868	-39.249		48.8687	-38.716		48.8846	-38.328		48.9009	-37.184		48.8685	-36.181
48.9097	-39.245		48.9104	-38.713		48.9262	-38.319		48.9426	-37.18		48.9101	-36.181
48.9514	-39.24		48.952	-38.709		48.9679	-38.31		48.9842	-37.175		48.9518	-36.18
48.993	-39.235		48.9937	-38.705		49.0096	-38.301		49.0259	-37.171		48.9935	-36.18
49.0347	-39.229		49.0354	-38.701		49.0512	-38.292		49.0676	-37.166		49.0351	-36.18
49.0764	-39.222		49.077	-38.696		49.0929	-38.283		49.1092	-37.161		49.0768	-36.179
49.118	-39.216		49.1187	-38.691		49.1346	-38.273		49.1509	-37.155		49.1185	-36.178
49.1597	-39.209		49.1604	-38.685		49.1762	-38.262		49.1925	-37.149		49.1601	-36.178
49.2014	-39.202		49.202	-38.679		49.2179	-38.251		49.2342	-37.142		49.2018	-36.177
49.243	-39.195		49.2437	-38.671		49.2596	-38.241		49.2759	-37.135		49.2435	-36.176
49.2847	-39.187		49.2854	-38.663		49.3012	-38.231		49.3175	-37.128		49.2851	-36.175
49.3264	-39.178		49.327	-38.655		49.3429	-38.221		49.3592	-37.121		49.3268	-36.173
49.368	-39.169		49.3687	-38.646		49.3846	-38.212		49.4009	-37.114		49.3685	-36.172
49.4097	-39.158		49.4104	-38.636		49.4262	-38.204		49.4426	-37.106		49.4101	-36.17
49.4513	-39.147		49.452	-38.627		49.4679	-38.194		49.4842	-37.098		49.4518	-36.167
49.493	-39.135		49.4937	-38.618		49.5096	-38.185		49.5259	-37.091		49.4934	-36.165
49.5347	-39.124		49.5354	-38.608		49.5512	-38.176		49.5676	-37.084		49.5351	-36.162
49.5763	-39.112		49.577	-38.598		49.5929	-38.166		49.6092	-37.075		49.5768	-36.158
49.618	-39.101		49.6187	-38.587		49.6346	-38.156		49.6509	-37.067		49.6184	-36.154
49.6597	-39.089		49.6604	-38.576		49.6762	-38.145		49.6925	-37.058		49.6601	-36.15
49.7013	-39.078		49.702	-38.564		49.7179	-38.134		49.7342	-37.049		49.7018	-36.146
49.743	-39.066		49.7437	-38.552		49.7596	-38.124		49.7759	-37.04		49.7434	-36.142
49.7847	-39.054		49.7854	-38.54		49.8012	-38.114		49.8175	-37.032		49.7851	-36.138
49.8263	-39.042		49.827	-38.528		49.8429	-38.105		49.8592	-37.023		49.8268	-36.133
49.868	-39.029		49.8687	-38.516		49.8846	-38.095		49.9009	-37.015		49.8684	-36.128
49.9097	-39.017		49.9104	-38.505		49.9262	-38.085		49.9425	-37.007		49.9101	-36.122
49.9513	-39.006		49.952	-38.494		49.9679	-38.075		49.9842	-36.998		49.9518	-36.115
49.993	-38.995		49.9937	-38.483		50.0095	-38.065		50.0259	-36.99		49.9934	-36.108
50.0347	-38.984		50.0354	-38.471		50.0512	-38.055		50.0675	-36.981		50.0351	-36.1
50.0763	-38.972		50.077	-38.458		50.0929	-38.043		50.1092	-36.973		50.0768	-36.092
50.118	-38.961		50.1187	-38.445		50.1345	-38.032		50.1509	-36.964		50.1184	-36.084
50.1597	-38.949		50.1604	-38.433		50.1762	-38.021		50.1925	-36.955		50.1601	-36.076
50.2013	-38.936		50.202	-38.421		50.2179	-38.011		50.2342	-36.945		50.2018	-36.068
50.243	-38.924		50.2437	-38.41		50.2595	-38.001		50.2759	-36.937		50.2434	-36.059
50.2847	-38.911		50.2854	-38.397		50.3012	-37.992		50.3175	-36.928		50.2851	-36.05
50.3263	-38.9		50.327	-38.385		50.3429	-37.981		50.3592	-36.92		50.3268	-36.04
50.368	-38.89		50.3687	-38.373		50.3845	-37.971		50.4009	-36.912		50.3684	-36.029
50.4097	-38.878		50.4104	-38.36		50.4262	-37.961		50.4425	-36.904		50.4101	-36.018
50.4514	-38.867		50.452	-38.348		50.4679	-37.95		50.4842	-36.895		50.4518	-36.006
50.493	-38.858		50.4937	-38.334		50.5095	-37.939		50.5259	-36.886		50.4934	-35.993
50.5347	-38.849		50.5354	-38.32		50.5512	-37.928		50.5675	-36.877		50.5418	-35.977
50.5763	-38.84		50.577	-38.306		50.5929	-37.917		50.6092	-36.867		50.5834	-35.964
50.618	-38.83		50.6187	-38.292		50.6345	-37.907		50.6509	-36.858		50.6251	-35.951
50.6597	-38.819		50.6604	-38.28		50.6762	-37.897		50.6925	-36.85		50.6668	-35.937
50.7013	-38.807		50.702	-38.266		50.7179	-37.888		50.7342	-36.841		50.7084	-35.923
50.743	-38.796		50.7437	-38.253		50.7595	-37.879		50.7759	-36.834		50.7501	-35.909
50.7847	-38.784		50.7854	-38.24		50.8012	-37.869		50.8175	-36.826		50.7918	-35.894
50.8263	-38.772		50.827	-38.226		50.8429	-37.859		50.8592	-36.817		50.8334	-35.879
50.868	-38.761		50.8687	-38.212		50.8845	-37.849		50.9009	-36.809		50.8751	-35.863
50.9097	-38.749		50.9104	-38.198		50.9262	-37.838		50.9425	-36.8		50.9168	-35.847
50.9513	-38.737		50.952	-38.185		50.9679	-37.826		50.9842	-36.79		50.9584	-35.83
50.993	-38.724		50.9937	-38.172		51.0095	-37.815		51.0259	-36.781		51.0001	-35.813
51.0347	-38.71		51.0354	-38.159		51.0512	-37.805		51.0675	-36.771		51.0418	-35.795
51.0763	-38.697		51.077	-38.147		51.0929	-37.795		51.1092	-36.762		51.0834	-35.776
51.118	-38.683		51.1187	-38.133		51.1345	-37.785		51.1509	-36.753		51.1251	-35.757
51.1597	-38.668		51.1604	-38.12		51.1762	-37.776		51.1925	-36.743		51.1668	-35.737
51.2013	-38.654		51.202	-38.107		51.2179	-37.766		51.2342	-36.733		51.2084	-35.717
51.243	-38.639		51.2437	-38.093		51.2595	-37.756		51.2759	-36.724		51.2501	-35.697
51.2847	-38.625		51.2854	-38.078		51.3012	-37.746		51.3175	-36.714		51.2918	-35.678
51.3263	-38.609		51.327	-38.063		51.3429	-37.735		51.3592	-36.705		51.3334	-35.659
51.368	-38.594		51.3687	-38.05		51.3845	-37.724		51.4009	-36.695		51.3751	-35.639
51.4097	-38.578		51.4104	-38.037		51.4262	-37.713		51.4425	-36.684		51.4168	-35.618
51.4513	-38.562		51.452	-38.023		51.4679	-37.702		51.4842	-36.672		51.4584	-35.597
51.493	-38.545		51.4937	-38.011		51.5095	-37.692		51.5259	-36.662		51.5001	-35.575
51.5347	-38.53		51.5354	-37.998		51.5512	-37.683		51.5675	-36.652		51.5418	-35.553
51.5763	-38.516		51.577	-37.985		51.5929	-37.673		51.6092	-36.642		51.5834	-35.532
51.618	-38.502		51.6187	-37.971		51.6345	-37.663		51.6509	-36.632		51.6251	-35.511
51.6597	-38.489		51.6603	-37.957		51.6762	-37.653		51.6925	-36.622		51.6668	-35.489
51.7013	-38.475		51.702	-37.943		51.7179	-37.642		51.7342	-36.612		51.7084	-35.466
51.743	-38.461		51.7437	-37.93		51.7595	-37.63		51.7759	-36.602		51.7501	-35.443
51.7847	-38.447		51.7853	-37.916		51.8012	-37.618		51.8175	-36.591		51.7918	-35.418
51.8263	-38.433		51.827	-37.903		51.8429	-37.607		51.8592	-36.581		51.8334	-35.392
51.868	-38.418		51.8687	-37.891		51.8845	-37.596		51.9009	-36.57		51.8751	-35.367
51.9097	-38.403		51.9103	-37.878		51.9262	-37.586		51.9425	-36.559		51.9168	-35.343
51.9513	-38.39		51.952	-37.864		51.9679	-37.576		51.9842	-36.549		51.9584	-35.319
51.993	-38.377		51.9937	-37.85		52.0095	-37.567		52.0259	-36.538		52.0001	-35.295
52.0347	-38.364		52.0354	-37.836		52.0512	-37.557		52.0675	-36.528		52.0418	-35.27
52.0763	-38.35		52.077	-37.822		52.0929	-37.546		52.1092	-36.518		52.0834	-35.245
52.118	-38.336		52.1187	-37.807		52.1345	-37.535		52.1509	-36.508		52.1251	-35.22
52.1597	-38.321		52.1604	-37.794		52.1762	-37.523		52.1925	-36.497		52.1668	-35.196
52.2013	-38.306		52.202	-37.781		52.2179	-37.511		52.2342	-36.486		52.2084	-35.173
52.243	-38.29		52.2437	-37.769		52.2595	-37.5		52.2759	-36.475		52.2501	-35.15
52.2847	-38.275		52.2853	-37.756		52.3012	-37.489		52.3175	-36.463		52.2918	-35.128
52.3263	-38.259		52.327	-37.743		52.3429	-37.479		52.3592	-36.452		52.3334	-35.104
52.368	-38.244		52.3687	-37.73		52.3845	-37.468		52.4009	-36.441		52.3751	-35.08
52.4097	-38.229		52.4104	-37.716		52.4262	-37.457		52.4425	-36.43		52.4167	-35.057
52.4513	-38.215		52.452	-37.702		52.4679	-37.446		52.4842	-36.419		52.4584	-35.032
52.493	-38.199		52.4937	-37.687		52.5095	-37.435		52.5259	-36.409		52.5001	-35.009
52.5347	-38.184		52.5353	-37.673		52.5512	-37.423		52.5675	-36.398		52.5417	-34.986
52.5763	-38.167		52.577	-37.66		52.5929	-37.41		52.6092	-36.387		52.5834	-34.964
52.618	-38.152		52.6187	-37.647		52.6345	-37.397		52.6509	-36.375		52.6251	-34.943
52.6597	-38.137		52.6603	-37.634		52.6762	-37.385		52.6925	-36.364		52.6667	-34.921
52.7013	-38.122		52.702	-37.621		52.7179	-37.373		52.7342	-36.352		52.7084	-34.899
52.743	-38.107		52.7437	-37.606		52.7595	-37.361		52.7759	-36.34		52.7501	-34.877
52.7847	-38.092		52.7853	-37.592		52.8012	-37.35		52.8175	-36.329		52.7917	-34.857
52.8263	-38.077		52.827	-37.576		52.8429	-37.339		52.8592	-36.318		52.8334	-34.837
52.868	-38.062		52.8687	-37.562		52.8845	-37.326		52.9009	-36.307		52.8751	-34.818
52.9097	-38.045		52.9103	-37.547		52.9262	-37.314		52.9425	-36.296		52.9167	-34.801
52.9513	-38.029		52.952	-37.532		52.9679	-37.302		52.9842	-36.285		52.9584	-34.783
52.993	-38.013		52.9937	-37.518		53.0095	-37.289		53.0259	-36.273		53.0001	-34.765
53.0347	-37.997		53.0353	-37.505		53.0512	-37.278		53.0675	-36.261		53.0417	-34.747
53.0763	-37.982		53.077	-37.491		53.0929	-37.267		53.1092	-36.249		53.0834	-34.729
53.118	-37.966		53.1187	-37.476		53.1345	-37.256		53.1509	-36.237		53.1251	-34.712
53.1597	-37.951		53.1603	-37.46		53.1762	-37.246		53.1925	-36.225		53.1667	-34.696
53.2013	-37.934		53.202	-37.445		53.2179	-37.235		53.2342	-36.213		53.2084	-34.68
53.243	-37.916		53.2437	-37.43		53.2595	-37.224		53.2759	-36.202		53.2501	-34.665
53.2847	-37.899		53.2853	-37.415		53.3012	-37.212		53.3175	-36.191		53.2917	-34.65
53.3263	-37.882		53.327	-37.4		53.3429	-37.2		53.3592	-36.18		53.3334	-34.636
53.368	-37.866		53.3687	-37.387		53.3845	-37.187		53.4008	-36.169		53.3751	-34.622
53.4096	-37.85		53.4104	-37.373		53.4262	-37.175		53.4425	-36.158		53.4167	-34.608
53.4513	-37.834		53.452	-37.358		53.4679	-37.163		53.4842	-36.146		53.4584	-34.595
53.493	-37.818		53.4937	-37.344		53.5095	-37.151		53.5258	-36.135		53.5001	-34.582
53.5347	-37.802		53.5354	-37.33		53.5512	-37.139		53.5675	-36.124		53.5417	-34.569
53.583	-37.782		53.577	-37.315		53.5929	-37.128		53.6092	-36.112		53.5834	-34.558
53.6247	-37.765		53.6187	-37.3		53.6345	-37.118		53.6508	-36.101		53.6251	-34.546
53.6663	-37.747		53.6604	-37.285		53.6762	-37.108		53.6925	-36.091		53.6668	-34.535
53.708	-37.73		53.7087	-37.269		53.7179	-37.097		53.7342	-36.081		53.7084	-34.524
53.7497	-37.714		53.7503	-37.255		53.7595	-37.086		53.7759	-36.071		53.7501	-34.513
53.7913	-37.697		53.792	-37.241		53.8012	-37.075		53.8175	-36.061		53.7917	-34.501
53.833	-37.682		53.8337	-37.228		53.8429	-37.064		53.8592	-36.05		53.8334	-34.489
53.8747	-37.666		53.8753	-37.214		53.8845	-37.054		53.9009	-36.039		53.8751	-34.477
53.9163	-37.65		53.917	-37.199		53.9262	-37.043		53.9425	-36.028		53.9168	-34.465
53.958	-37.635		53.9587	-37.184		53.9679	-37.033		53.9842	-36.017		53.9584	-34.455
53.9997	-37.619		54.0003	-37.17		54.0095	-37.023		54.0259	-36.007		54.0001	-34.445
54.0413	-37.602		54.042	-37.156		54.0512	-37.012		54.0675	-35.997		54.0418	-34.435
54.083	-37.585		54.0837	-37.142		54.0929	-37.002		54.1092	-35.987		54.0834	-34.426
54.1247	-37.568		54.1253	-37.127		54.1345	-36.991		54.1509	-35.977		54.1251	-34.416
54.1663	-37.551		54.167	-37.114		54.1762	-36.98		54.1925	-35.968		54.1667	-34.408
54.208	-37.535		54.2087	-37.1		54.2179	-36.969		54.2342	-35.958		54.2084	-34.397
54.2497	-37.518		54.2503	-37.087		54.2595	-36.958		54.2759	-35.948		54.2501	-34.387
54.2913	-37.501		54.292	-37.072		54.3079	-36.946		54.3175	-35.938		54.2917	-34.377
54.333	-37.482		54.3337	-37.058		54.3495	-36.936		54.3592	-35.928		54.3334	-34.367
54.3747	-37.463		54.3753	-37.043		54.3912	-36.926		54.4009	-35.919		54.3751	-34.357
54.4163	-37.445		54.417	-37.029		54.4329	-36.916		54.4425	-35.909		54.4167	-34.346
54.458	-37.427		54.4587	-37.015		54.4745	-36.907		54.4842	-35.9		54.4584	-34.337
54.4997	-37.409		54.5003	-37.001		54.5162	-36.897		54.5259	-35.891		54.5001	-34.328
54.5413	-37.393		54.542	-36.989		54.5579	-36.887		54.5675	-35.883		54.5417	-34.319
54.583	-37.376		54.5837	-36.975		54.5995	-36.877		54.6092	-35.875		54.5834	-34.31
54.6247	-37.359		54.6253	-36.962		54.6412	-36.867		54.6509	-35.866		54.6251	-34.301
54.6663	-37.341		54.667	-36.948		54.6829	-36.857		54.6925	-35.857		54.6667	-34.291
54.708	-37.323		54.7087	-36.933		54.7245	-36.848		54.7342	-35.848		54.7084	-34.282
54.7497	-37.304		54.7503	-36.919		54.7662	-36.839		54.7758	-35.838		54.7501	-34.273
54.7913	-37.286		54.792	-36.906		54.8079	-36.83		54.8175	-35.828		54.7917	-34.264
54.833	-37.268		54.8337	-36.892		54.8495	-36.822		54.8592	-35.819		54.8334	-34.256
54.8747	-37.249		54.8753	-36.879		54.8912	-36.813		54.9008	-35.81		54.8751	-34.248
54.9163	-37.232		54.917	-36.866		54.9329	-36.804		54.9425	-35.801		54.9167	-34.24
54.958	-37.214		54.9587	-36.854		54.9745	-36.795		54.9842	-35.793		54.9584	-34.233
54.9997	-37.197		55.0003	-36.84		55.0162	-36.786		55.0258	-35.785		55.0001	-34.226
55.0413	-37.179		55.042	-36.827		55.0579	-36.777		55.0675	-35.776		55.0417	-34.22
55.083	-37.16		55.0837	-36.813		55.0995	-36.767		55.1092	-35.767		55.0834	-34.213
55.1247	-37.142		55.1253	-36.798		55.1412	-36.758		55.1508	-35.759		55.1251	-34.207
55.1663	-37.124		55.167	-36.783		55.1829	-36.749		55.1925	-35.751		55.1667	-34.201
55.208	-37.107		55.2087	-36.769		55.2245	-36.74		55.2342	-35.742		55.2084	-34.195
55.2497	-37.09		55.2503	-36.756		55.2662	-36.732		55.2758	-35.734		55.2501	-34.189
55.2913	-37.073		55.292	-36.743		55.3079	-36.723		55.3175	-35.726		55.2917	-34.184
55.333	-37.055		55.3337	-36.731		55.3495	-36.715		55.3592	-35.718		55.3334	-34.179
55.3746	-37.036		55.3753	-36.717		55.3912	-36.706		55.4008	-35.71		55.3751	-34.175
55.4163	-37.017		55.417	-36.703		55.4329	-36.697		55.4425	-35.702		55.4167	-34.171
55.458	-36.999		55.4587	-36.689		55.4745	-36.687		55.4842	-35.694		55.4584	-34.167
55.4996	-36.983		55.5003	-36.675		55.5162	-36.677		55.5258	-35.685		55.5001	-34.163
55.5413	-36.966		55.542	-36.661		55.5579	-36.667		55.5675	-35.676		55.5417	-34.16
55.583	-36.951		55.5836	-36.648		55.5995	-36.658		55.6092	-35.667		55.5834	-34.156
55.6246	-36.934		55.6253	-36.634		55.6412	-36.648		55.6508	-35.658		55.6251	-34.153
55.6663	-36.917		55.667	-36.621		55.6829	-36.639		55.6925	-35.648		55.6667	-34.15
55.708	-36.899		55.7087	-36.607		55.7245	-36.629		55.7342	-35.639		55.7084	-34.146
55.7496	-36.881		55.7503	-36.593		55.7662	-36.619		55.7758	-35.631		55.7501	-34.144
55.7913	-36.864		55.792	-36.579		55.8079	-36.609		55.8175	-35.623		55.7917	-34.141
55.833	-36.847		55.8337	-36.564		55.8495	-36.599		55.8592	-35.614		55.8334	-34.139
55.8746	-36.83		55.8753	-36.549		55.8912	-36.589		55.9008	-35.606		55.8751	-34.136
55.9163	-36.813		55.917	-36.535		55.9329	-36.578		55.9425	-35.599		55.9167	-34.135
55.958	-36.797		55.9587	-36.52		55.9745	-36.567		55.9842	-35.591		55.9584	-34.133
55.9996	-36.78		56.0003	-36.506		56.0162	-36.557		56.0258	-35.583		56.0001	-34.131
56.0413	-36.762		56.042	-36.493		56.0579	-36.547		56.0675	-35.574		56.0417	-34.13
56.083	-36.744		56.0837	-36.48		56.0995	-36.538		56.1092	-35.565		56.0834	-34.129
56.1246	-36.726		56.1253	-36.466		56.1412	-36.529		56.1508	-35.556		56.1251	-34.127
56.1663	-36.707		56.167	-36.453		56.1829	-36.52		56.1925	-35.548		56.1667	-34.126
56.208	-36.689		56.2087	-36.439		56.2245	-36.511		56.2342	-35.54		56.2084	-34.125
56.2497	-36.672		56.2503	-36.424		56.2662	-36.502		56.2758	-35.532		56.2501	-34.124
56.2913	-36.655		56.292	-36.41		56.3079	-36.492		56.3175	-35.524		56.2917	-34.123
56.333	-36.639		56.3337	-36.397		56.3495	-36.482		56.3592	-35.516		56.3334	-34.122
56.3747	-36.622		56.3753	-36.384		56.3912	-36.473		56.4008	-35.508		56.3751	-34.121
56.4163	-36.603		56.417	-36.371		56.4329	-36.463		56.4425	-35.499		56.4167	-34.121
56.458	-36.585		56.4587	-36.359		56.4745	-36.454		56.4842	-35.49		56.4584	-34.12
56.4996	-36.567		56.5003	-36.346		56.5162	-36.445		56.5258	-35.481		56.5001	-34.12
56.5413	-36.55		56.542	-36.332		56.5579	-36.436		56.5742	-35.471		56.5417	-34.12
56.583	-36.533		56.5837	-36.318		56.5995	-36.426		56.6158	-35.463		56.5834	-34.119
56.6246	-36.517		56.6253	-36.304		56.6412	-36.417		56.6575	-35.454		56.6251	-34.119
56.6663	-36.5		56.667	-36.291		56.6829	-36.407		56.6992	-35.447		56.6667	-34.119
56.708	-36.484		56.7087	-36.277		56.7245	-36.397		56.7408	-35.439		56.7084	-34.119
56.7496	-36.467		56.7503	-36.264		56.7662	-36.386		56.7825	-35.432		56.7501	-34.118
56.7913	-36.448		56.792	-36.252		56.8079	-36.376		56.8242	-35.424		56.7917	-34.118
56.833	-36.43		56.8336	-36.24		56.8495	-36.366		56.8658	-35.417		56.8334	-34.118
56.8746	-36.413		56.8753	-36.229		56.8912	-36.357		56.9075	-35.41		56.8751	-34.118
56.9163	-36.397		56.917	-36.216		56.9328	-36.347		56.9492	-35.401		56.9167	-34.117
56.958	-36.381		56.9586	-36.203		56.9745	-36.338		56.9908	-35.393		56.9584	-34.117
56.9996	-36.366		57.0003	-36.191		57.0162	-36.33		57.0325	-35.385		57.0001	-34.117
57.0413	-36.35		57.042	-36.178		57.0578	-36.322		57.0742	-35.377		57.0417	-34.117
57.083	-36.335		57.0837	-36.165		57.0995	-36.312		57.1158	-35.369		57.0834	-34.117
57.1246	-36.319		57.1253	-36.152		57.1412	-36.302		57.1575	-35.361		57.1251	-34.117
57.1663	-36.303		57.167	-36.141		57.1829	-36.293		57.1992	-35.354		57.1667	-34.116
57.208	-36.286		57.2086	-36.129		57.2245	-36.283		57.2408	-35.346		57.2084	-34.116
57.2496	-36.27		57.2503	-36.117		57.2662	-36.273		57.2825	-35.339		57.25	-34.116
57.2913	-36.254		57.292	-36.106		57.3079	-36.263		57.3242	-35.331		57.2917	-34.116
57.333	-36.239		57.3336	-36.095		57.3495	-36.254		57.3658	-35.323		57.3334	-34.116
57.3746	-36.224		57.3753	-36.083		57.3912	-36.245		57.4075	-35.315		57.375	-34.116
57.4163	-36.209		57.417	-36.07		57.4329	-36.237		57.4492	-35.306		57.4167	-34.116
57.458	-36.194		57.4586	-36.058		57.4745	-36.228		57.4908	-35.298		57.4584	-34.116
57.4996	-36.179		57.5003	-36.047		57.5162	-36.218		57.5325	-35.29		57.5	-34.115
57.5413	-36.163		57.542	-36.035		57.5579	-36.209		57.5742	-35.282		57.5417	-34.115
57.583	-36.147		57.5837	-36.024		57.5995	-36.199		57.6158	-35.274		57.5834	-34.115
57.6246	-36.131		57.6253	-36.014		57.6412	-36.188		57.6575	-35.267		57.6251	-34.115
57.6663	-36.117		57.667	-36.004		57.6829	-36.179		57.6992	-35.259		57.6667	-34.115
57.708	-36.102		57.7087	-35.994		57.7245	-36.17		57.7408	-35.25		57.7084	-34.115
57.7496	-36.088		57.7503	-35.984		57.7662	-36.16		57.7825	-35.242		57.7501	-34.115
57.7913	-36.074		57.792	-35.973		57.8079	-36.152		57.8242	-35.233		57.7917	-34.115
57.833	-36.06		57.8337	-35.963		57.8495	-36.144		57.8658	-35.225		57.8334	-34.115
57.8746	-36.044		57.8753	-35.952		57.8912	-36.135		57.9075	-35.216		57.8751	-34.115
57.9163	-36.029		57.917	-35.942		57.9329	-36.126		57.9492	-35.208		57.9167	-34.115
57.958	-36.014		57.9586	-35.932		57.9745	-36.117		57.9909	-35.201		57.9584	-34.115
57.9996	-36		58.0003	-35.923		58.0162	-36.108		58.0325	-35.194		58.0001	-34.115
58.0413	-35.987		58.042	-35.913		58.0578	-36.099		58.0742	-35.187		58.0417	-34.115
58.083	-35.974		58.0836	-35.904		58.0995	-36.089		58.1158	-35.18		58.0834	-34.115
58.1246	-35.96		58.1253	-35.894		58.1412	-36.08		58.1575	-35.172		58.1251	-34.115
58.1663	-35.946		58.167	-35.884		58.1829	-36.071		58.1992	-35.165		58.1667	-34.114
58.208	-35.932		58.2086	-35.873		58.2245	-36.063		58.2408	-35.157		58.2084	-34.114
58.2496	-35.918		58.2503	-35.863		58.2662	-36.054		58.2825	-35.148		58.2501	-34.114
58.2913	-35.903		58.292	-35.853		58.3078	-36.046		58.3242	-35.14		58.2917	-34.114
58.333	-35.888		58.3336	-35.843		58.3495	-36.037		58.3658	-35.131		58.3334	-34.114
58.3746	-35.874		58.3753	-35.833		58.3912	-36.028		58.4075	-35.123		58.3751	-34.114
58.4163	-35.86		58.417	-35.824		58.4329	-36.019		58.4492	-35.115		58.4167	-34.114
58.458	-35.847		58.4586	-35.815		58.4745	-36.009		58.4908	-35.107		58.4584	-34.114
58.4996	-35.834		58.5003	-35.806		58.5162	-35.999		58.5325	-35.1		58.5001	-34.114
58.5413	-35.822		58.542	-35.797		58.5578	-35.99		58.5742	-35.093		58.5417	-34.114
58.583	-35.809		58.5836	-35.788		58.5995	-35.982		58.6158	-35.086		58.5834	-34.114
58.6246	-35.796		58.6253	-35.779		58.6412	-35.973		58.6575	-35.078		58.6251	-34.113
58.6663	-35.782		58.667	-35.769		58.6828	-35.965		58.6992	-35.07		58.6667	-34.113
58.708	-35.767		58.7086	-35.76		58.7245	-35.956		58.7408	-35.062		58.7084	-34.113
58.7496	-35.753		58.7503	-35.751		58.7662	-35.948		58.7825	-35.054		58.7501	-34.113
58.7913	-35.74		58.792	-35.743		58.8078	-35.939		58.8242	-35.046		58.7917	-34.113
58.833	-35.727		58.8336	-35.735		58.8495	-35.929		58.8658	-35.038		58.8334	-34.112
58.8746	-35.713		58.8753	-35.727		58.8912	-35.92		58.9075	-35.03		58.8751	-34.112
58.9163	-35.7		58.917	-35.72		58.9328	-35.911		58.9492	-35.023		58.9167	-34.112
58.958	-35.687		58.9586	-35.712		58.9745	-35.903		58.9908	-35.015		58.9584	-34.112
58.9996	-35.674		59.0003	-35.704		59.0162	-35.894		59.0325	-35.008		59.0001	-34.111
59.0413	-35.66		59.042	-35.696		59.0579	-35.886		59.0742	-35.001		59.0417	-34.111
59.083	-35.646		59.0836	-35.687		59.0995	-35.878		59.1158	-34.993		59.0834	-34.111
59.1246	-35.632		59.1253	-35.679		59.1412	-35.87		59.1575	-34.985		59.1251	-34.11
59.1663	-35.62		59.167	-35.671		59.1828	-35.861		59.1992	-34.976		59.1667	-34.11
59.208	-35.607		59.2086	-35.662		59.2245	-35.852		59.2408	-34.968		59.2084	-34.109
59.2496	-35.595		59.2503	-35.655		59.2662	-35.844		59.2825	-34.961		59.2501	-34.108
59.2913	-35.583		59.292	-35.647		59.3078	-35.834		59.3242	-34.954		59.2917	-34.108
59.333	-35.57		59.3336	-35.641		59.3495	-35.825		59.3658	-34.947		59.3334	-34.107
59.3746	-35.558		59.3753	-35.634		59.3912	-35.817		59.4075	-34.94		59.3751	-34.107
59.4163	-35.546		59.417	-35.627		59.4328	-35.809		59.4492	-34.933		59.4167	-34.106
59.458	-35.534		59.4586	-35.62		59.4745	-35.802		59.4908	-34.927		59.4584	-34.105
59.4996	-35.522		59.5003	-35.612		59.5162	-35.795		59.5325	-34.92		59.5001	-34.104
59.5413	-35.511		59.542	-35.604		59.5578	-35.787		59.5742	-34.912		59.5417	-34.103
59.583	-35.501		59.5836	-35.596		59.5995	-35.779		59.6158	-34.905		59.5834	-34.102
59.6246	-35.491		59.6253	-35.589		59.6412	-35.771		59.6575	-34.898		59.6251	-34.1
59.6663	-35.48		59.667	-35.582		59.6828	-35.763		59.6992	-34.89		59.6667	-34.099
59.708	-35.47		59.7086	-35.576		59.7245	-35.754		59.7408	-34.883		59.7084	-34.098
59.7496	-35.459		59.7503	-35.57		59.7662	-35.745		59.7825	-34.876		59.7501	-34.096
59.7913	-35.448		59.792	-35.564		59.8079	-35.736		59.8242	-34.869		59.7917	-34.095
59.833	-35.436		59.8336	-35.558		59.8495	-35.727		59.8658	-34.862		59.8334	-34.094
59.8746	-35.424		59.8753	-35.551		59.8912	-35.719		59.9075	-34.854		59.8751	-34.092
59.9163	-35.412		59.917	-35.545		59.9328	-35.712		59.9492	-34.847		59.9167	-34.09
59.958	-35.401		59.9586	-35.538		59.9745	-35.704		59.9908	-34.839		59.9584	-34.088
59.9996	-35.391		60.0003	-35.531		60.0162	-35.697		60.0325	-34.831		60.0001	-34.086
60.0413	-35.381		60.042	-35.524		60.0578	-35.689		60.0742	-34.823		60.0417	-34.084
60.083	-35.371		60.0836	-35.517		60.0995	-35.682		60.1158	-34.815		60.0834	-34.081
60.1246	-35.361		60.1253	-35.51		60.1412	-35.674		60.1575	-34.808		60.1251	-34.079
60.1663	-35.351		60.167	-35.504		60.1828	-35.666		60.1992	-34.8		60.1667	-34.076
60.208	-35.34		60.2086	-35.498		60.2245	-35.657		60.2408	-34.793		60.2084	-34.073
60.2496	-35.329		60.2503	-35.492		60.2662	-35.649		60.2825	-34.786		60.2501	-34.07
60.2913	-35.318		60.292	-35.486		60.3079	-35.642		60.3242	-34.779		60.2917	-34.068
60.333	-35.307		60.3336	-35.48		60.3495	-35.635		60.3658	-34.772		60.3334	-34.065
60.3746	-35.297		60.3753	-35.474		60.3912	-35.629		60.4075	-34.765		60.3751	-34.062
60.4163	-35.287		60.417	-35.468		60.4328	-35.623		60.4492	-34.758		60.4167	-34.059
60.458	-35.277		60.4586	-35.462		60.4745	-35.617		60.4908	-34.751		60.4584	-34.055
60.4996	-35.267		60.5003	-35.456		60.5162	-35.61		60.5325	-34.744		60.5001	-34.052
60.5413	-35.256		60.542	-35.45		60.5578	-35.603		60.5742	-34.737		60.5417	-34.048
60.583	-35.246		60.5836	-35.444		60.5995	-35.596		60.6158	-34.731		60.5834	-34.044
60.6246	-35.236		60.6253	-35.439		60.6412	-35.589		60.6575	-34.724		60.6251	-34.039
60.6663	-35.225		60.667	-35.433		60.6828	-35.582		60.6991	-34.717		60.6667	-34.035
60.708	-35.214		60.7086	-35.428		60.7245	-35.575		60.7408	-34.711		60.7084	-34.03
60.7496	-35.203		60.7503	-35.423		60.7662	-35.568		60.7825	-34.705		60.75	-34.026
60.7913	-35.193		60.792	-35.418		60.8078	-35.562		60.8241	-34.699		60.7917	-34.021
60.833	-35.183		60.8336	-35.412		60.8495	-35.556		60.8658	-34.692		60.8334	-34.016
60.8746	-35.174		60.8753	-35.407		60.8912	-35.55		60.9075	-34.685		60.875	-34.012
60.9163	-35.166		60.917	-35.401		60.9328	-35.544		60.9492	-34.678		60.9167	-34.007
60.958	-35.157		60.9586	-35.395		60.9745	-35.538		60.9908	-34.671		60.9584	-34.001
60.9996	-35.149		61.0003	-35.39		61.0162	-35.532		61.0325	-34.663		61.0001	-33.995
61.0413	-35.141		61.042	-35.385		61.0578	-35.526		61.0742	-34.656		61.0417	-33.989
61.083	-35.132		61.0836	-35.38		61.0995	-35.52		61.1158	-34.65		61.0834	-33.982
61.1246	-35.124		61.1253	-35.375		61.1412	-35.514		61.1575	-34.644		61.1251	-33.976
61.1663	-35.116		61.167	-35.371		61.1828	-35.509		61.1992	-34.638		61.1667	-33.97
61.208	-35.109		61.2086	-35.366		61.2245	-35.503		61.2408	-34.632		61.2084	-33.963
61.2496	-35.101		61.2503	-35.362		61.2662	-35.498		61.2825	-34.625		61.2501	-33.957
61.2913	-35.094		61.292	-35.358		61.3078	-35.494		61.3241	-34.619		61.2917	-33.95
61.333	-35.086		61.3336	-35.353		61.3495	-35.489		61.3658	-34.612		61.3334	-33.944
61.3746	-35.079		61.3753	-35.348		61.3912	-35.485		61.4075	-34.606		61.3751	-33.938
61.4163	-35.071		61.417	-35.344		61.4328	-35.481		61.4492	-34.599		61.4167	-33.932
61.458	-35.064		61.4586	-35.339		61.4745	-35.477		61.4908	-34.592		61.4584	-33.925
61.4996	-35.055		61.5003	-35.335		61.5162	-35.473		61.5325	-34.586		61.5001	-33.918
61.5413	-35.046		61.542	-35.331		61.5578	-35.469		61.5742	-34.579		61.5417	-33.911
61.583	-35.037		61.5836	-35.327		61.5995	-35.464		61.6158	-34.573		61.5834	-33.904
61.6246	-35.029		61.6253	-35.323		61.6412	-35.46		61.6575	-34.568		61.6251	-33.897
61.6663	-35.022		61.667	-35.319		61.6828	-35.456		61.6992	-34.562		61.6667	-33.889
61.708	-35.015		61.7086	-35.315		61.7245	-35.452		61.7408	-34.556		61.7084	-33.881
61.7496	-35.008		61.7503	-35.311		61.7662	-35.449		61.7825	-34.549		61.7567	-33.872
61.7913	-35.002		61.792	-35.308		61.8078	-35.445		61.8242	-34.543		61.7984	-33.863
61.833	-34.996		61.8336	-35.304		61.8495	-35.442		61.8658	-34.536		61.84	-33.855
61.8746	-34.989		61.8753	-35.299		61.8912	-35.439		61.9075	-34.529		61.8817	-33.845
61.9163	-34.982		61.917	-35.295		61.9328	-35.436		61.9492	-34.522		61.9234	-33.836
61.9579	-34.976		61.9586	-35.291		61.9745	-35.433		61.9908	-34.516		61.9651	-33.826
61.9996	-34.969		62.0003	-35.287		62.0162	-35.429		62.0325	-34.51		62.0067	-33.817
62.0413	-34.962		62.042	-35.284		62.0578	-35.426		62.0742	-34.505		62.0484	-33.808
62.0829	-34.956		62.0836	-35.281		62.0995	-35.422		62.1158	-34.499		62.09	-33.799
62.1246	-34.95		62.1253	-35.278		62.1412	-35.419		62.1575	-34.495		62.1317	-33.791
62.1663	-34.944		62.167	-35.274		62.1828	-35.417		62.1992	-34.489		62.1734	-33.783
62.2079	-34.939		62.2086	-35.272		62.2245	-35.414		62.2408	-34.484		62.215	-33.774
62.2496	-34.934		62.2503	-35.269		62.2662	-35.411		62.2825	-34.479		62.2567	-33.766
62.2913	-34.929		62.292	-35.266		62.3078	-35.409		62.3242	-34.473		62.2984	-33.756
62.3329	-34.924		62.3336	-35.263		62.3495	-35.407		62.3658	-34.468		62.34	-33.746
62.3746	-34.919		62.3753	-35.259		62.3912	-35.405		62.4075	-34.463		62.3817	-33.737
62.4163	-34.914		62.417	-35.256		62.4328	-35.402		62.4492	-34.457		62.4234	-33.727
62.458	-34.908		62.4586	-35.253		62.4745	-35.4		62.4908	-34.452		62.465	-33.718
62.4996	-34.902		62.5003	-35.251		62.5162	-35.398		62.5325	-34.448		62.5067	-33.709
62.5413	-34.896		62.542	-35.248		62.5578	-35.396		62.5742	-34.443		62.5484	-33.7
62.583	-34.891		62.5836	-35.246		62.5995	-35.394		62.6158	-34.438		62.59	-33.691
62.6246	-34.886		62.6253	-35.244		62.6412	-35.392		62.6575	-34.433		62.6317	-33.682
62.6663	-34.881		62.667	-35.241		62.6828	-35.39		62.6992	-34.428		62.6734	-33.673
62.708	-34.877		62.7086	-35.239		62.7245	-35.388		62.7408	-34.422		62.715	-33.663
62.7496	-34.872		62.7503	-35.237		62.7662	-35.386		62.7825	-34.416		62.7567	-33.653
62.7913	-34.866		62.792	-35.235		62.8078	-35.384		62.8241	-34.411		62.7984	-33.643
62.833	-34.86		62.8336	-35.233		62.8495	-35.383		62.8658	-34.406		62.84	-33.634
62.8746	-34.855		62.8753	-35.23		62.8912	-35.381		62.9075	-34.401		62.8817	-33.624
62.9163	-34.85		62.917	-35.228		62.9328	-35.38		62.9492	-34.395		62.9234	-33.615
62.958	-34.844		62.9586	-35.225		62.9745	-35.379		62.9908	-34.391		62.965	-33.607
62.9996	-34.839		63.0003	-35.223		63.0162	-35.377		63.0325	-34.386		63.0067	-33.598
63.0413	-34.835		63.042	-35.221		63.0578	-35.375		63.0742	-34.381		63.0484	-33.589
63.0829	-34.832		63.0836	-35.219		63.0995	-35.374		63.1158	-34.377		63.09	-33.581
63.1246	-34.828		63.1253	-35.218		63.1412	-35.372		63.1575	-34.372		63.1317	-33.572
63.1663	-34.825		63.167	-35.216		63.1828	-35.37		63.1992	-34.368		63.1734	-33.563
63.2079	-34.821		63.2086	-35.215		63.2245	-35.369		63.2408	-34.363		63.215	-33.553
63.2496	-34.817		63.2503	-35.213		63.2662	-35.368		63.2825	-34.358		63.2567	-33.544
63.2913	-34.813		63.292	-35.211		63.3079	-35.367		63.3242	-34.353		63.2984	-33.536
63.333	-34.808		63.3336	-35.21		63.3495	-35.366		63.3658	-34.349		63.34	-33.528
63.3746	-34.804		63.3753	-35.208		63.3912	-35.365		63.4075	-34.345		63.3817	-33.519
63.4163	-34.799		63.417	-35.206		63.4328	-35.364		63.4492	-34.341		63.4234	-33.511
63.458	-34.795		63.4586	-35.205		63.4745	-35.363		63.4908	-34.337		63.465	-33.502
63.4996	-34.791		63.5003	-35.203		63.5162	-35.362		63.5325	-34.333		63.5067	-33.493
63.5413	-34.788		63.542	-35.201		63.5578	-35.361		63.5742	-34.329		63.5484	-33.484
63.583	-34.785		63.5836	-35.2		63.5995	-35.36		63.6158	-34.325		63.59	-33.475
63.6246	-34.781		63.6253	-35.199		63.6412	-35.359		63.6575	-34.321		63.6317	-33.466
63.6663	-34.778		63.667	-35.197		63.6828	-35.358		63.6992	-34.317		63.6734	-33.457
63.708	-34.775		63.7086	-35.196		63.7245	-35.358		63.7408	-34.312		63.7151	-33.448
63.7496	-34.771		63.7503	-35.195		63.7662	-35.357		63.7825	-34.308		63.7567	-33.439
63.7913	-34.768		63.792	-35.194		63.8078	-35.356		63.8242	-34.303		63.7984	-33.431
63.833	-34.764		63.8336	-35.192		63.8495	-35.355		63.8658	-34.299		63.84	-33.423
63.8746	-34.76		63.8753	-35.191		63.8912	-35.355		63.9075	-34.295		63.8817	-33.415
63.9163	-34.756		63.917	-35.189		63.9329	-35.354		63.9492	-34.291		63.9234	-33.407
63.958	-34.753		63.9586	-35.188		63.9745	-35.354		63.9908	-34.288		63.965	-33.398
63.9996	-34.749		64.0003	-35.187		64.0162	-35.353		64.0325	-34.284		64.0067	-33.39
64.0413	-34.745		64.042	-35.185		64.0579	-35.353		64.0742	-34.28		64.0484	-33.381
64.083	-34.742		64.0837	-35.184		64.0995	-35.352		64.1158	-34.276		64.0901	-33.372
64.1246	-34.738		64.1253	-35.182		64.1412	-35.351		64.1575	-34.272		64.1317	-33.363
64.1663	-34.734		64.167	-35.181		64.1829	-35.351		64.1992	-34.268		64.1734	-33.355
64.2079	-34.73		64.2087	-35.18		64.2245	-35.35		64.2408	-34.264		64.2151	-33.347
64.2496	-34.726		64.2503	-35.178		64.2662	-35.349		64.2825	-34.26		64.2567	-33.339
64.2913	-34.722		64.292	-35.177		64.3078	-35.349		64.3242	-34.256		64.2984	-33.332
64.333	-34.717		64.3337	-35.176		64.3495	-35.348		64.3658	-34.253		64.3401	-33.324
64.3746	-34.712		64.3753	-35.174		64.3912	-35.348		64.4075	-34.249		64.3817	-33.316
64.4163	-34.706		64.417	-35.173		64.4328	-35.347		64.4492	-34.246		64.4234	-33.307
64.458	-34.701		64.4586	-35.171		64.4745	-35.347		64.4908	-34.243		64.4651	-33.298
64.4996	-34.697		64.5003	-35.169		64.5162	-35.346		64.5325	-34.24		64.5067	-33.29
64.5413	-34.693		64.542	-35.168		64.5578	-35.346		64.5741	-34.237		64.5484	-33.281
64.583	-34.69		64.5836	-35.167		64.5995	-35.345		64.6158	-34.234		64.59	-33.273
64.6246	-34.687		64.6253	-35.165		64.6412	-35.345		64.6575	-34.231		64.6317	-33.266
64.6663	-34.685		64.667	-35.164		64.6828	-35.344		64.6992	-34.227		64.6734	-33.259
64.7146	-34.681		64.7086	-35.162		64.7245	-35.344		64.7408	-34.223		64.7151	-33.252
64.7563	-34.678		64.7503	-35.161		64.7662	-35.343		64.7825	-34.22		64.7567	-33.246
64.798	-34.674		64.792	-35.16		64.8078	-35.343		64.8242	-34.216		64.7984	-33.239
64.8396	-34.671		64.8336	-35.158		64.8495	-35.342		64.8658	-34.213		64.8401	-33.233
64.8813	-34.668		64.882	-35.157		64.8912	-35.342		64.9075	-34.21		64.8817	-33.227
64.923	-34.664		64.9236	-35.155		64.9328	-35.341		64.9492	-34.207		64.9234	-33.221
64.9646	-34.661		64.9653	-35.153		64.9745	-35.341		64.9908	-34.205		64.9651	-33.214
65.0063	-34.658		65.007	-35.151		65.0162	-35.34		65.0325	-34.202		65.0067	-33.208
65.048	-34.655		65.0486	-35.15		65.0578	-35.34		65.0742	-34.199		65.0484	-33.202
65.0896	-34.652		65.0903	-35.148		65.0995	-35.34		65.1158	-34.196		65.0901	-33.196
65.1313	-34.649		65.132	-35.146		65.1412	-35.339		65.1575	-34.193		65.1317	-33.19
65.173	-34.645		65.1736	-35.145		65.1828	-35.338		65.1992	-34.19		65.1734	-33.184
65.2146	-34.642		65.2153	-35.143		65.2245	-35.338		65.2408	-34.187		65.2151	-33.178
65.2563	-34.638		65.257	-35.142		65.2662	-35.337		65.2825	-34.183		65.2567	-33.172
65.298	-34.633		65.2986	-35.14		65.3078	-35.337		65.3242	-34.18		65.2984	-33.165
65.3396	-34.629		65.3403	-35.139		65.3495	-35.336		65.3658	-34.177		65.3401	-33.158
65.3813	-34.624		65.382	-35.137		65.3912	-35.335		65.4075	-34.175		65.3817	-33.152
65.423	-34.62		65.4236	-35.136		65.4412	-35.335		65.4492	-34.172		65.4234	-33.145
65.4646	-34.616		65.4653	-35.134		65.4895	-35.334		65.4908	-34.169		65.465	-33.139
65.5063	-34.612		65.507	-35.132		65.5312	-35.334		65.5325	-34.167		65.5067	-33.134
65.548	-34.609		65.5486	-35.13		65.5728	-35.333		65.5742	-34.164		65.5484	-33.128
65.5896	-34.605		65.5903	-35.129		65.6145	-35.333		65.6158	-34.161		65.5901	-33.123
65.6313	-34.601		65.632	-35.127		65.6562	-35.332		65.6575	-34.158		65.6317	-33.118
65.673	-34.597		65.6736	-35.126		65.6978	-35.332		65.6992	-34.154		65.6734	-33.113
65.7146	-34.593		65.7153	-35.124		65.7395	-35.331		65.7408	-34.15		65.715	-33.108
65.7563	-34.588		65.757	-35.123		65.7812	-35.331		65.7825	-34.146		65.7567	-33.102
65.7979	-34.583		65.7986	-35.121		65.8228	-35.33		65.8242	-34.143		65.7984	-33.096
65.8396	-34.579		65.8403	-35.12		65.8645	-35.329		65.8658	-34.139		65.8401	-33.091
65.8813	-34.575		65.882	-35.118		65.9062	-35.329		65.9075	-34.136		65.8817	-33.085
65.923	-34.571		65.9236	-35.116		65.9478	-35.328		65.9492	-34.133		65.9234	-33.079
65.9646	-34.567		65.9653	-35.114		65.9895	-35.328		65.9908	-34.13		65.9651	-33.074
66.0063	-34.563		66.007	-35.112		66.0312	-35.327		66.0325	-34.126		66.0067	-33.069
66.048	-34.559		66.0486	-35.11		66.0728	-35.327		66.0742	-34.123		66.0484	-33.064
66.0896	-34.555		66.0903	-35.108		66.1145	-35.326		66.1158	-34.119		66.0901	-33.06
66.1313	-34.551		66.132	-35.106		66.1562	-35.326		66.1575	-34.116		66.1317	-33.055
66.173	-34.547		66.1736	-35.104		66.1978	-35.325		66.1992	-34.112		66.1734	-33.05
66.2146	-34.542		66.2153	-35.102		66.2395	-35.324		66.2408	-34.109		66.215	-33.044
66.2563	-34.537		66.257	-35.101		66.2811	-35.324		66.2825	-34.105		66.2567	-33.039
66.298	-34.532		66.2986	-35.099		66.3228	-35.323		66.3242	-34.102		66.2984	-33.033
66.3396	-34.527		66.3403	-35.098		66.3645	-35.322		66.3658	-34.098		66.34	-33.027
66.3813	-34.522		66.382	-35.096		66.4062	-35.321		66.4075	-34.095		66.3817	-33.022
66.423	-34.517		66.4236	-35.095		66.4478	-35.321		66.4492	-34.091		66.4234	-33.017
66.4646	-34.512		66.4653	-35.093		66.4895	-35.32		66.4908	-34.087		66.465	-33.012
66.5063	-34.508		66.507	-35.091		66.5312	-35.319		66.5325	-34.083		66.5067	-33.008
66.548	-34.504		66.5486	-35.089		66.5728	-35.319		66.5742	-34.079		66.5484	-33.003
66.5896	-34.5		66.5903	-35.088		66.6145	-35.318		66.6158	-34.074		66.59	-32.998
66.6313	-34.496		66.632	-35.087		66.6562	-35.318		66.6575	-34.069		66.6317	-32.994
66.673	-34.491		66.6736	-35.085		66.6978	-35.318		66.6992	-34.063		66.6734	-32.989
66.7146	-34.487		66.7153	-35.084		66.7395	-35.317		66.7408	-34.059		66.715	-32.984
66.7563	-34.483		66.757	-35.083		66.7812	-35.317		66.7825	-34.054		66.7567	-32.979
66.798	-34.479		66.7986	-35.082		66.8228	-35.316		66.8242	-34.05		66.7984	-32.974
66.8396	-34.476		66.8403	-35.081		66.8645	-35.316		66.8658	-34.046		66.84	-32.969
66.8813	-34.472		66.882	-35.08		66.9062	-35.315		66.9075	-34.042		66.8817	-32.965
66.923	-34.469		66.9236	-35.079		66.9478	-35.315		66.9492	-34.038		66.9234	-32.96
66.9646	-34.466		66.9653	-35.078		66.9895	-35.315		66.9908	-34.034		66.965	-32.956
67.0063	-34.463		67.007	-35.077		67.0312	-35.314		67.0325	-34.03		67.0067	-32.952
67.048	-34.46		67.0486	-35.075		67.0728	-35.314		67.0742	-34.026		67.0484	-32.947
67.0896	-34.456		67.0903	-35.074		67.1145	-35.314		67.1158	-34.021		67.0901	-32.943
67.1313	-34.452		67.132	-35.073		67.1562	-35.314		67.1575	-34.017		67.1317	-32.939
67.173	-34.448		67.1736	-35.071		67.1978	-35.314		67.1992	-34.012		67.1734	-32.934
67.2146	-34.444		67.2153	-35.07		67.2395	-35.313		67.2408	-34.008		67.215	-32.929
67.2563	-34.441		67.257	-35.069		67.2812	-35.313		67.2825	-34.003		67.2567	-32.924
67.298	-34.437		67.2986	-35.068		67.3228	-35.313		67.3242	-33.999		67.2984	-32.92
67.3396	-34.433		67.3403	-35.067		67.3645	-35.313		67.3658	-33.994		67.34	-32.916
67.3813	-34.43		67.382	-35.066		67.4062	-35.312		67.4075	-33.99		67.3817	-32.911
67.423	-34.427		67.4236	-35.065		67.4478	-35.312		67.4492	-33.985		67.4234	-32.906
67.4646	-34.423		67.4653	-35.064		67.4895	-35.312		67.4908	-33.98		67.465	-32.902
67.5063	-34.42		67.507	-35.063		67.5312	-35.312		67.5325	-33.975		67.5067	-32.898
67.548	-34.417		67.5486	-35.061		67.5728	-35.311		67.5742	-33.97		67.5484	-32.894
67.5896	-34.414		67.5903	-35.06		67.6145	-35.311		67.6158	-33.964		67.59	-32.889
67.6313	-34.41		67.632	-35.059		67.6562	-35.311		67.6575	-33.959		67.6317	-32.884
67.673	-34.407		67.6736	-35.057		67.6978	-35.311		67.6992	-33.954		67.6734	-32.879
67.7146	-34.403		67.7153	-35.056		67.7395	-35.31		67.7408	-33.948		67.715	-32.874
67.7563	-34.399		67.757	-35.055		67.7812	-35.31		67.7892	-33.942		67.7567	-32.869
67.798	-34.395		67.7986	-35.054		67.8228	-35.31		67.8308	-33.937		67.7984	-32.864
67.8396	-34.391		67.8403	-35.053		67.8645	-35.309		67.8725	-33.932		67.84	-32.859
67.8813	-34.388		67.882	-35.051		67.9062	-35.309		67.9142	-33.926		67.8817	-32.855
67.923	-34.385		67.9236	-35.05		67.9478	-35.308		67.9558	-33.921		67.9234	-32.85
67.9646	-34.381		67.9653	-35.048		67.9895	-35.307		67.9975	-33.914		67.9651	-32.846
68.0063	-34.377		68.007	-35.046		68.0312	-35.306		68.0392	-33.908		68.0067	-32.841
68.048	-34.373		68.0486	-35.044		68.0728	-35.306		68.0808	-33.901		68.0484	-32.836
68.0896	-34.367		68.0903	-35.042		68.1145	-35.305		68.1225	-33.895		68.0901	-32.83
68.1313	-34.361		68.132	-35.039		68.1562	-35.304		68.1642	-33.888		68.1317	-32.824
68.173	-34.355		68.1736	-35.037		68.1978	-35.303		68.2058	-33.881		68.1734	-32.818
68.2146	-34.348		68.2153	-35.034		68.2395	-35.302		68.2475	-33.875		68.215	-32.813
68.2563	-34.341		68.257	-35.032		68.2812	-35.301		68.2892	-33.869		68.2567	-32.807
68.298	-34.335		68.2986	-35.029		68.3228	-35.3		68.3308	-33.862		68.2984	-32.801
68.3396	-34.329		68.3403	-35.026		68.3645	-35.299		68.3725	-33.855		68.34	-32.796
68.3813	-34.323		68.382	-35.023		68.4062	-35.297		68.4142	-33.848		68.3817	-32.79
68.423	-34.316		68.4236	-35.02		68.4478	-35.295		68.4558	-33.841		68.4234	-32.784
68.4646	-34.31		68.4653	-35.017		68.4895	-35.293		68.4975	-33.833		68.465	-32.777
68.5063	-34.303		68.507	-35.013		68.5312	-35.291		68.5392	-33.825		68.5067	-32.771
68.548	-34.296		68.5486	-35.009		68.5728	-35.289		68.5808	-33.817		68.5484	-32.764
68.5896	-34.289		68.5903	-35.005		68.6145	-35.287		68.6225	-33.809		68.5901	-32.757
68.6313	-34.282		68.632	-35.001		68.6562	-35.285		68.6642	-33.801		68.6317	-32.751
68.673	-34.275		68.6736	-34.997		68.6978	-35.283		68.7058	-33.794		68.6734	-32.744
68.7146	-34.269		68.7153	-34.993		68.7395	-35.281		68.7475	-33.786		68.7151	-32.737
68.7563	-34.262		68.757	-34.99		68.7812	-35.278		68.7892	-33.779		68.7567	-32.729
68.798	-34.255		68.7986	-34.986		68.8228	-35.276		68.8308	-33.771		68.7984	-32.723
68.8396	-34.249		68.8403	-34.983		68.8645	-35.274		68.8725	-33.764		68.8401	-32.717
68.8813	-34.242		68.882	-34.98		68.9062	-35.271		68.9142	-33.756		68.8817	-32.71
68.923	-34.236		68.9236	-34.977		68.9478	-35.269		68.9558	-33.747		68.9234	-32.703
68.9646	-34.229		68.9653	-34.973		68.9895	-35.266		68.9975	-33.74		68.965	-32.696
69.0063	-34.222		69.007	-34.97		69.0312	-35.264		69.0392	-33.732		69.0067	-32.689
69.048	-34.214		69.0486	-34.967		69.0729	-35.262		69.0808	-33.725		69.0484	-32.682
69.0896	-34.207		69.0903	-34.963		69.1145	-35.26		69.1225	-33.719		69.09	-32.675
69.1313	-34.201		69.132	-34.96		69.1562	-35.258		69.1642	-33.713		69.1317	-32.668
69.173	-34.196		69.1736	-34.957		69.1979	-35.256		69.2058	-33.706		69.1734	-32.661
69.2146	-34.191		69.2153	-34.955		69.2395	-35.254		69.2475	-33.7		69.2151	-32.655
69.2563	-34.187		69.257	-34.953		69.2812	-35.253		69.2892	-33.695		69.2567	-32.65
69.298	-34.183		69.2986	-34.951		69.3229	-35.251		69.3308	-33.689		69.2984	-32.645
69.3396	-34.18		69.3403	-34.949		69.3645	-35.25		69.3725	-33.683		69.3401	-32.639
69.3813	-34.177		69.382	-34.948		69.4062	-35.249		69.4142	-33.677		69.3817	-32.634
69.423	-34.174		69.4236	-34.947		69.4479	-35.248		69.4558	-33.672		69.4234	-32.629
69.4646	-34.17		69.4653	-34.946		69.4895	-35.247		69.4975	-33.667		69.4651	-32.624
69.5063	-34.167		69.507	-34.945		69.5312	-35.246		69.5392	-33.663		69.5067	-32.619
69.548	-34.164		69.5486	-34.944		69.5729	-35.245		69.5808	-33.659		69.5484	-32.615
69.5896	-34.161		69.5903	-34.943		69.6145	-35.244		69.6225	-33.655		69.5901	-32.611
69.6313	-34.159		69.632	-34.943		69.6562	-35.244		69.6642	-33.652		69.6317	-32.607
69.673	-34.157		69.6736	-34.942		69.6978	-35.244		69.7058	-33.648		69.6734	-32.604
69.7146	-34.156		69.7153	-34.942		69.7395	-35.243		69.7475	-33.645		69.7151	-32.601
69.7563	-34.154		69.757	-34.941		69.7812	-35.243		69.7892	-33.642		69.7567	-32.599
69.798	-34.153		69.7986	-34.941		69.8228	-35.243		69.8308	-33.638		69.7984	-32.596
69.8396	-34.152		69.8403	-34.941		69.8645	-35.243		69.8725	-33.636		69.84	-32.594
69.8813	-34.151		69.882	-34.941		69.9062	-35.243		69.9142	-33.633		69.8817	-32.591
69.923	-34.15		69.9236	-34.941		69.9478	-35.243		69.9558	-33.63		69.9234	-32.589
69.9646	-34.149		69.9653	-34.94		69.9895	-35.242		69.9975	-33.628		69.9651	-32.587
[truncated: 1,320 more rows]

## Sheet: MSI-78 scrambled scans
60% MSI-78s			60% MSI-78s			20% MSI-78s			20% MSI-78s			5% MSI-78s
[truncated: 2,879 more rows]

[truncated: 2 more sheets: Antibiotic scans, Misc Scans]
